# Supplementary material
Source: publisher figshare collection journal article supplement (https://wiley.figshare.com/ndownloader/files/17599175)
Supplement: Supplementary file 1 [file 17599175]

year,rep,transect,set,group,ind,adults,pups,animals,chop,glare,ISU,date,observer,region,stratum,length_m,area_km2,CC,west_lat,west_long,east_lat,east_long,GROUP_X,GROUP_Y,look
1999,5,68,14,0,1,0,0,0,0,0,,5/13/199,DMONSON,GLBA,H,418.14824,0.167259296,0,6512527.322,440573.4424,6512735.238,440935.4625,,,
1999,1,74,6,0,1,0,0,0,0,0,,5/8/99,DMONSON,GLBA,H,1034.52853,0.413811412,0,6511628.31,440617.5595,6512145.538,441513.0489,,,
1999,2,74,2,0,1,0,0,0,0,0,,5/9/99,DMONSON,GLBA,H,1034.52853,0.413811412,0,6511628.31,440617.5595,6512145.538,441513.0489,,,
1999,3,74,4,0,1,0,0,0,0,0,,5/10/199,DMONSON,GLBA,H,1034.52853,0.413811412,0,6511628.31,440617.5595,6512145.538,441513.0489,,,
1999,4,74,6,0,1,0,0,0,0,0,,5/12/199,DMONSON,GLBA,H,1034.52853,0.413811412,0,6511628.31,440617.5595,6512145.538,441513.0489,,,
1999,5,76,14,0,1,0,0,0,0,0,,5/13/199,DMONSON,GLBA,H,1678.94878,0.671579512,0,6505549.138,442886.3726,6506387.384,444340.1985,,,
1999,1,76,6,0,1,0,0,0,0,0,,5/8/99,DMONSON,GLBA,H,447.74468,0.179097872,0,6510377.687,438449.8705,6510601.696,438838.521,,,
1999,2,76,2,0,1,0,0,0,0,0,,5/9/99,DMONSON,GLBA,H,447.74468,0.179097872,0,6510377.687,438449.8705,6510601.696,438838.521,,,
1999,3,76,4,0,1,0,0,0,4,0,,5/10/199,DMONSON,GLBA,H,447.74468,0.179097872,0,6510377.687,438449.8705,6510601.696,438838.521,,,
1999,4,76,6,0,1,0,0,0,4,0,,5/12/199,DMONSON,GLBA,H,447.74468,0.179097872,0,6510377.687,438449.8705,6510601.696,438838.521,,,
1999,5,78,14,0,1,0,0,0,0,0,,5/13/199,DMONSON,GLBA,H,478.18256,0.191273024,0,6503354.227,429486.5637,6503593.627,429899.9384,,,
1999,5,79,14,0,1,0,0,0,0,0,,5/13/199,DMONSON,GLBA,H,586.40825,0.2345633,0,6503349.699,424677.2086,6503642.451,425185.7311,,,
1999,1,79,6,0,1,0,0,0,4,0,,5/8/99,DMONSON,GLBA,H,1018.56201,0.407424804,0,6507068.614,432720.8016,6507578.725,433602.8642,,,
1999,2,79,2,0,1,0,0,0,0,0,,5/9/99,DMONSON,GLBA,H,1018.56201,0.407424804,0,6507068.614,432720.8016,6507578.725,433602.8642,,,
1999,3,79,4,0,1,0,0,0,4,0,,5/10/199,DMONSON,GLBA,H,1018.56201,0.407424804,0,6507068.614,432720.8016,6507578.725,433602.8642,,,
1999,4,79,6,0,1,0,0,0,4,0,,5/12/199,DMONSON,GLBA,H,1018.56201,0.407424804,0,6507068.614,432720.8016,6507578.725,433602.8642,,,
1999,5,80,14,0,1,0,0,0,0,0,,5/13/199,DMONSON,GLBA,H,1730.47963,0.692191852,0,6501588.129,426425.3,6502452.923,427923.5457,,,
1999,1,80,6,0,1,0,0,0,0,0,,5/8/99,DMONSON,GLBA,H,1286.76306,0.514705224,0,6506903.669,442033.9383,6507546.106,443147.5243,,,
1999,2,80,2,0,1,0,0,0,0,0,,5/9/99,DMONSON,GLBA,H,1286.76306,0.514705224,0,6506903.669,442033.9383,6507546.106,443147.5243,,,
1999,3,80,4,0,1,0,0,0,0,0,,5/10/199,DMONSON,GLBA,H,1286.76306,0.514705224,0,6506903.669,442033.9383,6507546.106,443147.5243,,,
1999,4,80,6,0,1,0,0,0,4,0,,5/12/199,DMONSON,GLBA,H,1286.76306,0.514705224,0,6506903.669,442033.9383,6507546.106,443147.5243,,,
1999,5,81,14,0,1,0,0,0,0,0,,5/13/199,DMONSON,GLBA,H,833.03252,0.333213008,0,6501156.931,444877.7046,6501573.672,445598.4707,,,
1999,5,82,14,0,1,0,0,0,0,0,,5/13/199,DMONSON,GLBA,H,416.90721,0.166762884,0,6500788.187,429840.6838,6500997.015,430201.5014,,,
1999,5,83,14,0,1,0,0,0,0,0,,5/13/199,DMONSON,GLBA,H,518.79766,0.207519064,0,6499855.034,442622.7315,6500113.856,443071.697,,,
1999,5,84,14,0,1,0,0,0,0,0,,5/13/199,DMONSON,GLBA,H,1464.57995,0.58583198,0,6499631.292,427836.4487,6500363.47,429104.2845,,,
1999,1,84,6,0,1,0,0,0,0,0,,5/8/99,DMONSON,GLBA,H,1357.03873,0.542815492,0,6504861.97,443296.7239,6505541.013,444472.0661,,,
1999,2,84,2,0,1,0,0,0,0,0,,5/9/99,DMONSON,GLBA,H,1357.03873,0.542815492,0,6504861.97,443296.7239,6505541.013,444472.0661,,,
1999,3,84,4,0,1,0,0,0,0,0,,5/10/199,DMONSON,GLBA,H,1357.03873,0.542815492,0,6504861.97,443296.7239,6505541.013,444472.0661,,,
1999,4,84,6,0,1,0,0,0,0,0,,5/12/199,DMONSON,GLBA,H,1357.03873,0.542815492,0,6504861.97,443296.7239,6505541.013,444472.0661,,,
1999,1,85,6,0,1,0,0,0,4,0,,5/8/99,DMONSON,GLBA,H,638.84143,0.255536572,0,6504430.847,437748.4979,6504750.556,438301.6872,,,
1999,2,85,2,0,1,0,0,0,4,0,,5/9/99,DMONSON,GLBA,H,638.84143,0.255536572,0,6504430.847,437748.4979,6504750.556,438301.6872,,,
1999,3,85,4,0,1,0,0,0,0,0,,5/10/199,DMONSON,GLBA,H,638.84143,0.255536572,0,6504430.847,437748.4979,6504750.556,438301.6872,,,
1999,4,85,6,0,1,0,0,0,4,0,,5/12/199,DMONSON,GLBA,H,638.84143,0.255536572,0,6504430.847,437748.4979,6504750.556,438301.6872,,,
1999,5,86,14,0,1,0,0,0,0,0,,5/13/199,DMONSON,GLBA,H,415.59833,0.166239332,0,6499016.517,445970.2574,6499226.86,446328.3994,,,
1999,1,86,6,0,1,0,0,0,0,0,,5/8/99,DMONSON,GLBA,H,719.33624,0.287734496,0,6502762.965,425263.6078,6503124.165,425885.6519,,,
1999,2,86,2,0,1,0,0,0,0,0,,5/9/99,DMONSON,GLBA,H,719.33624,0.287734496,0,6502762.965,425263.6078,6503124.165,425885.6519,,,
1999,3,86,4,0,1,0,0,0,1,0,,5/10/199,DMONSON,GLBA,H,719.33624,0.287734496,0,6502762.965,425263.6078,6503124.165,425885.6519,,,
1999,4,86,6,0,1,0,0,0,4,0,,5/12/199,DMONSON,GLBA,H,719.33624,0.287734496,0,6502762.965,425263.6078,6503124.165,425885.6519,,,
1999,1,87,6,0,1,0,0,0,0,0,,5/8/99,DMONSON,GLBA,H,424.47461,0.169789844,0,6502399.284,429432.4997,6502611.682,429799.063,,,
1999,2,87,2,0,1,0,0,0,4,0,,5/9/99,DMONSON,GLBA,H,424.47461,0.169789844,0,6502399.284,429432.4997,6502611.682,429799.063,,,
1999,3,87,4,0,1,0,0,0,4,0,,5/10/199,DMONSON,GLBA,H,424.47461,0.169789844,0,6502399.284,429432.4997,6502611.682,429799.063,,,
1999,4,87,6,0,1,0,0,0,2,0,,5/12/199,DMONSON,GLBA,H,424.47461,0.169789844,0,6502399.284,429432.4997,6502611.682,429799.063,,,
1999,5,88,14,0,1,0,0,0,0,0,,5/13/199,DMONSON,GLBA,H,506.40298,0.202561192,0,6496909.1,447117.7534,6497161.159,447555.9925,,,
1999,5,89,14,0,1,0,0,0,0,0,,5/13/199,DMONSON,GLBA,H,1658.1059,0.66324236,0,6496510.36,441631.9687,6497341.051,443067.007,,,
1999,1,89,6,0,1,0,0,0,2,0,,5/8/99,DMONSON,GLBA,H,1702.49201,0.680996804,0,6500847.082,426743.2179,6501697.601,428217.2151,,,
1999,2,89,2,0,1,0,0,0,4,0,,5/9/99,DMONSON,GLBA,H,1702.49201,0.680996804,0,6500847.082,426743.2179,6501697.601,428217.2151,,,
1999,3,89,4,0,1,0,0,0,0,0,,5/10/199,DMONSON,GLBA,H,1702.49201,0.680996804,0,6500847.082,426743.2179,6501697.601,428217.2151,,,
1999,4,89,6,0,1,0,0,0,4,0,,5/12/199,DMONSON,GLBA,H,1702.49201,0.680996804,0,6500847.082,426743.2179,6501697.601,428217.2151,,,
1999,5,90,14,0,1,0,0,0,0,0,,5/13/199,DMONSON,GLBA,H,417.74129,0.167096516,0,6495862.922,435709.5832,6496072.279,436071.4869,,,
1999,1,90,6,0,1,0,0,0,0,0,,5/8/99,DMONSON,GLBA,H,556.43243,0.222572972,0,6500689.272,445666.4195,6500968.401,446148.253,,,
1999,2,90,2,0,1,0,0,0,0,0,,5/9/99,DMONSON,GLBA,H,556.43243,0.222572972,0,6500689.272,445666.4195,6500968.401,446148.253,,,
1999,3,90,4,0,1,0,0,0,0,0,,5/10/199,DMONSON,GLBA,H,556.43243,0.222572972,0,6500689.272,445666.4195,6500968.401,446148.253,,,
1999,4,90,6,0,1,0,0,0,4,0,,5/12/199,DMONSON,GLBA,H,556.43243,0.222572972,0,6500689.272,445666.4195,6500968.401,446148.253,,,
1999,5,92,14,0,1,0,0,0,0,0,,5/13/199,DMONSON,GLBA,H,5071.63156,2.028652624,0,6494975.711,429375.4751,6497512.083,433766.9466,,,
1999,5,93,14,0,1,0,0,0,4,0,,5/13/199,DMONSON,GLBA,H,5229.92787,2.091971148,0,6493826.267,446578.7244,6496443.169,451106.8489,,,
1999,1,93,6,0,1,0,0,0,0,0,,5/8/99,DMONSON,GLBA,H,482.91405,0.19316562,0,6498469.303,446621.9488,6498710.435,447040.5408,,,
1999,2,93,2,0,1,0,0,0,0,0,,5/9/99,DMONSON,GLBA,H,482.91405,0.19316562,0,6498469.303,446621.9488,6498710.435,447040.5408,,,
1999,3,93,4,0,1,0,0,0,0,0,,5/10/199,DMONSON,GLBA,H,482.91405,0.19316562,0,6498469.303,446621.9488,6498710.435,447040.5408,,,
1999,4,93,6,0,1,0,0,0,4,0,,5/12/199,DMONSON,GLBA,H,482.91405,0.19316562,0,6498469.303,446621.9488,6498710.435,447040.5408,,,
1999,5,94,14,0,1,0,0,0,0,0,,5/13/199,DMONSON,GLBA,H,549.28998,0.219715992,0,6493517.793,436445.5074,6493792.201,436921.0788,,,
1999,1,94,6,0,1,0,0,0,4,0,,5/8/99,DMONSON,GLBA,H,1972.00292,0.788801168,0,6497231.209,430080.7387,6498218.118,431788.1368,,,
1999,2,94,2,0,1,0,0,0,4,0,,5/9/99,DMONSON,GLBA,H,1972.00292,0.788801168,0,6497231.209,430080.7387,6498218.118,431788.1368,,,
1999,3,94,4,0,1,0,0,0,4,0,,5/10/199,DMONSON,GLBA,H,1972.00292,0.788801168,0,6497231.209,430080.7387,6498218.118,431788.1368,,,
1999,4,94,6,0,1,0,0,0,4,0,,5/12/199,DMONSON,GLBA,H,1972.00292,0.788801168,0,6497231.209,430080.7387,6498218.118,431788.1368,,,
1999,5,95,14,0,1,0,0,0,3,0,,5/13/199,DMONSON,GLBA,H,3553.47726,1.421390904,0,6492874.199,430533.9862,6494650.782,433610.7652,,,
1999,5,96,14,0,1,0,0,0,0,0,,5/13/199,DMONSON,GLBA,H,2400.28663,0.960114652,0,6491526.279,432999.9008,6492727.334,435078.0757,,,
1999,1,96,6,0,1,0,0,0,0,0,,5/8/99,DMONSON,GLBA,H,420.28381,0.168113524,0,6496419.562,428674.0586,6496630.087,429038.2746,,,
1999,2,96,2,0,1,0,0,0,0,0,,5/9/99,DMONSON,GLBA,H,420.28381,0.168113524,0,6496419.562,428674.0586,6496630.087,429038.2746,,,
1999,3,96,4,0,1,0,0,0,0,0,,5/10/199,DMONSON,GLBA,H,420.28381,0.168113524,0,6496419.562,428674.0586,6496630.087,429038.2746,,,
1999,4,96,6,0,1,0,0,0,0,0,,5/12/199,DMONSON,GLBA,H,420.28381,0.168113524,0,6496419.562,428674.0586,6496630.087,429038.2746,,,
1999,5,97,14,1,1,1,0,1,0,0,,5/13/199,DMONSON,GLBA,H,6196.79923,2.478719692,0,6490168.937,440244.769,6493267.999,445610.4119,441363.6403,6490850.286,
1999,5,97,14,2,1,1,0,1,0,0,,5/13/199,DMONSON,GLBA,H,6196.79923,2.478719692,0,6490168.937,440244.769,6493267.999,445610.4119,441605.2407,6490957.665,
1999,5,97,14,3,1,40,1,41,0,0,,5/13/199,DMONSON,GLBA,H,6196.79923,2.478719692,1,6490168.937,440244.769,6493267.999,445610.4119,440493.94,6490324.074,
1999,5,98,14,0,1,0,0,0,0,0,,5/13/199,DMONSON,GLBA,H,1809.25221,0.723700884,0,6489409.123,448513.3133,6490313.061,450079.326,,,
1999,1,98,6,0,1,0,0,0,4,0,,5/8/99,DMONSON,GLBA,H,409.0819,0.16363276,0,6495164.191,436100.2101,6495370.014,436453.376,,,
1999,2,98,2,0,1,0,0,0,4,0,,5/9/99,DMONSON,GLBA,H,409.0819,0.16363276,0,6495164.191,436100.2101,6495370.014,436453.376,,,
1999,3,98,4,0,1,0,0,0,4,0,,5/10/199,DMONSON,GLBA,H,409.0819,0.16363276,0,6495164.191,436100.2101,6495370.014,436453.376,,,
1999,4,98,6,0,1,0,0,0,0,0,,5/12/199,DMONSON,GLBA,H,409.0819,0.16363276,0,6495164.191,436100.2101,6495370.014,436453.376,,,
1999,5,99,14,0,1,0,0,0,0,0,,5/13/199,DMONSON,GLBA,H,730.55599,0.292222396,0,6488985.97,433395.0416,6489350.164,434028.1762,,,
1999,1,99,6,0,1,0,0,0,4,0,,5/8/99,DMONSON,GLBA,H,2904.23215,1.16169286,0,6495062.113,445521.0698,6496514.422,448036.4258,,,
1999,2,99,2,0,1,0,0,0,4,0,,5/9/99,DMONSON,GLBA,H,2904.23215,1.16169286,0,6495062.113,445521.0698,6496514.422,448036.4258,,,
1999,3,99,4,0,1,0,0,0,0,0,,5/10/199,DMONSON,GLBA,H,2904.23215,1.16169286,0,6495062.113,445521.0698,6496514.422,448036.4258,,,
1999,4,99,6,0,1,0,0,0,0,0,,5/12/199,DMONSON,GLBA,H,2904.23215,1.16169286,0,6495062.113,445521.0698,6496514.422,448036.4258,,,
1999,5,100,14,0,1,0,0,0,4,0,,5/13/199,DMONSON,GLBA,H,677.13299,0.270853196,0,6487316.836,449705.1504,6487663.877,450287.2115,,,
1999,1,100,6,1,1,1,0,1,0,0,2,5/8/99,DMONSON,GLBA,H,2974.03285,1.18961314,0,6494676.054,430454.5855,6496164.146,433030.047,430717.9839,6494842.179,19991002
1999,2,100,2,0,1,0,0,0,4,0,,5/9/99,DMONSON,GLBA,H,2974.03285,1.18961314,0,6494676.054,430454.5855,6496164.146,433030.047,,,
1999,3,100,4,0,1,0,0,0,0,0,,5/10/199,DMONSON,GLBA,H,2974.03285,1.18961314,0,6494676.054,430454.5855,6496164.146,433030.047,,,
1999,4,100,6,0,1,0,0,0,1,0,,5/12/199,DMONSON,GLBA,H,2974.03285,1.18961314,0,6494676.054,430454.5855,6496164.146,433030.047,,,
1999,5,101,14,0,1,0,0,0,0,0,,5/13/199,DMONSON,GLBA,H,953.43021,0.381372084,0,6484749.625,435662.5453,6485229.896,436485.5078,,,
1999,1,101,6,0,1,0,0,0,4,0,,5/8/99,DMONSON,GLBA,H,1269.85944,0.507943776,0,6494253.368,448918.2567,6494888.699,450018.599,,,
1999,2,101,2,0,1,0,0,0,4,0,,5/9/99,DMONSON,GLBA,H,1269.85944,0.507943776,0,6494253.368,448918.2567,6494888.699,450018.599,,,
1999,3,101,4,0,1,0,0,0,4,0,,5/10/199,DMONSON,GLBA,H,1269.85944,0.507943776,0,6494253.368,448918.2567,6494888.699,450018.599,,,
1999,4,101,6,0,1,0,0,0,0,0,,5/12/199,DMONSON,GLBA,H,1269.85944,0.507943776,0,6494253.368,448918.2567,6494888.699,450018.599,,,
1999,5,102,14,0,1,0,0,0,1,0,,5/13/199,DMONSON,GLBA,H,8734.07931,3.493631724,0,6484704.678,440378.8855,6489077.101,447938.334,,,
1999,1,102,6,0,1,0,0,0,4,0,,5/8/99,DMONSON,GLBA,H,2928.86322,1.171545288,0,6493385.106,442615.6756,6494850.136,445151.8242,,,
1999,2,102,2,0,1,0,0,0,4,0,,5/9/99,DMONSON,GLBA,H,2928.86322,1.171545288,0,6493385.106,442615.6756,6494850.136,445151.8242,,,
1999,3,102,4,0,1,0,0,0,4,0,,5/10/199,DMONSON,GLBA,H,2928.86322,1.171545288,0,6493385.106,442615.6756,6494850.136,445151.8242,,,
1999,4,102,6,0,1,0,0,0,0,0,,5/12/199,DMONSON,GLBA,H,2928.86322,1.171545288,0,6493385.106,442615.6756,6494850.136,445151.8242,,,
1999,5,103,14,0,1,0,0,0,0,0,,5/13/199,DMONSON,GLBA,H,866.79941,0.346719764,0,6483276.175,442701.3958,6483708.843,443452.1172,,,
1999,1,103,6,0,1,0,0,0,4,0,,5/8/99,DMONSON,GLBA,H,1149.89475,0.4599579,0,6493186.664,447072.1266,6493761.633,448067.5994,,,
1999,2,103,2,0,1,0,0,0,4,0,,5/9/99,DMONSON,GLBA,H,1149.89475,0.4599579,0,6493186.664,447072.1266,6493761.633,448067.5994,,,
1999,3,103,4,0,1,0,0,0,4,0,,5/10/199,DMONSON,GLBA,H,1149.89475,0.4599579,0,6493186.664,447072.1266,6493761.633,448067.5994,,,
1999,4,103,6,0,1,0,0,0,0,0,,5/12/199,DMONSON,GLBA,H,1149.89475,0.4599579,0,6493186.664,447072.1266,6493761.633,448067.5994,,,
1999,5,104,14,0,1,0,0,0,0,0,,5/13/199,DMONSON,GLBA,H,882.15169,0.352860676,0,6482237.506,440906.165,6482678.921,441670.0586,,,
1999,1,104,6,0,1,0,0,0,4,0,,5/8/99,DMONSON,GLBA,H,441.98036,0.176792144,0,6492761.268,436742.4966,6492981.511,437126.1279,,,
1999,2,104,2,0,1,0,0,0,4,0,,5/9/99,DMONSON,GLBA,H,441.98036,0.176792144,0,6492761.268,436742.4966,6492981.511,437126.1279,,,
1999,3,104,4,0,1,0,0,0,0,0,,5/10/199,DMONSON,GLBA,H,441.98036,0.176792144,0,6492761.268,436742.4966,6492981.511,437126.1279,,,
1999,4,104,6,0,1,0,0,0,0,0,,5/12/199,DMONSON,GLBA,H,441.98036,0.176792144,0,6492761.268,436742.4966,6492981.511,437126.1279,,,
1999,5,105,14,0,1,0,0,0,0,0,,5/13/199,DMONSON,GLBA,H,1410.59687,0.564238748,0,6481908.799,445133.371,6482613.855,446354.4049,,,
1999,1,105,6,0,1,0,0,0,4,0,,5/8/99,DMONSON,GLBA,H,711.38621,0.284554484,0,6492107.872,440405.3282,6492464.167,441020.6693,,,
1999,2,105,2,0,1,0,0,0,4,0,,5/9/99,DMONSON,GLBA,H,711.38621,0.284554484,0,6492107.872,440405.3282,6492464.167,441020.6693,,,
1999,3,105,4,0,1,0,0,0,4,0,,5/10/199,DMONSON,GLBA,H,711.38621,0.284554484,0,6492107.872,440405.3282,6492464.167,441020.6693,,,
1999,4,105,6,0,1,0,0,0,0,0,,5/12/199,DMONSON,GLBA,H,711.38621,0.284554484,0,6492107.872,440405.3282,6492464.167,441020.6693,,,
1999,5,106,14,0,1,0,0,0,0,0,,5/13/199,DMONSON,GLBA,H,788.40399,0.315361596,0,6481566.599,439745.7623,6481960.771,440428.5086,,,
1999,1,106,6,0,1,0,0,0,3,0,,5/8/99,DMONSON,GLBA,H,2360.94188,0.944376752,0,6490825.458,433388.5421,6492005.014,435432.655,,,
1999,2,106,2,0,1,0,0,0,3,0,,5/9/99,DMONSON,GLBA,H,2360.94188,0.944376752,0,6490825.458,433388.5421,6492005.014,435432.655,,,
1999,3,106,4,0,1,0,0,0,0,0,,5/10/199,DMONSON,GLBA,H,2360.94188,0.944376752,0,6490825.458,433388.5421,6492005.014,435432.655,,,
1999,4,106,6,0,1,0,0,0,0,0,,5/12/199,DMONSON,GLBA,H,2360.94188,0.944376752,0,6490825.458,433388.5421,6492005.014,435432.655,,,
1999,5,107,14,0,1,0,0,0,0,0,,5/13/199,DMONSON,GLBA,H,535.38176,0.214152704,0,6480289.807,442329.9476,6480557.694,442793.9167,,,
1999,1,107,6,0,1,0,0,0,0,0,,5/8/99,DMONSON,GLBA,H,2205.45927,0.882183708,0,6488639.036,448786.5659,6489742.892,450695.9071,,,
1999,2,107,2,0,1,0,0,0,4,0,,5/9/99,DMONSON,GLBA,H,2205.45927,0.882183708,0,6488639.036,448786.5659,6489742.892,450695.9071,,,
1999,3,107,4,0,1,0,0,0,0,0,,5/10/199,DMONSON,GLBA,H,2205.45927,0.882183708,0,6488639.036,448786.5659,6489742.892,450695.9071,,,
1999,4,107,6,0,1,0,0,0,0,0,,5/12/199,DMONSON,GLBA,H,2205.45927,0.882183708,0,6488639.036,448786.5659,6489742.892,450695.9071,,,
1999,5,108,14,0,1,0,0,0,0,0,,5/13/199,DMONSON,GLBA,H,2228.51585,0.89140634,0,6479687.507,436503.6125,6480807.552,438427.9646,,,
1999,1,108,6,0,1,0,0,0,0,0,,5/8/99,DMONSON,GLBA,H,2643.7769,1.05751076,0,6487414.271,441869.6833,6488737.632,444159.4561,,,
1999,2,108,2,0,1,0,0,0,4,0,,5/9/99,DMONSON,GLBA,H,2643.7769,1.05751076,0,6487414.271,441869.6833,6488737.632,444159.4561,,,
1999,3,108,4,0,1,0,0,0,2,0,,5/10/199,DMONSON,GLBA,H,2643.7769,1.05751076,0,6487414.271,441869.6833,6488737.632,444159.4561,,,
1999,4,108,6,0,1,0,0,0,0,0,,5/12/199,DMONSON,GLBA,H,2643.7769,1.05751076,0,6487414.271,441869.6833,6488737.632,444159.4561,,,
1999,5,109,14,0,1,0,0,0,0,0,,5/13/199,DMONSON,GLBA,H,1623.66512,0.649466048,0,6476879.829,446026.7303,6477694.073,447431.6218,,,
1999,1,109,6,0,1,0,0,0,0,0,,5/8/99,DMONSON,GLBA,H,914.70602,0.365882408,0,6486526.997,449933.8735,6486975.302,450729.9413,,,
1999,2,109,2,0,1,0,0,0,4,0,,5/9/99,DMONSON,GLBA,H,914.70602,0.365882408,0,6486526.997,449933.8735,6486975.302,450729.9413,,,
1999,3,109,4,0,1,0,0,0,0,0,,5/10/199,DMONSON,GLBA,H,914.70602,0.365882408,0,6486526.997,449933.8735,6486975.302,450729.9413,,,
1999,4,109,6,0,1,0,0,0,0,0,,5/12/199,DMONSON,GLBA,H,914.70602,0.365882408,0,6486526.997,449933.8735,6486975.302,450729.9413,,,
1999,5,110,14,0,1,0,0,0,0,0,,5/13/199,DMONSON,GLBA,H,507.72523,0.203090092,0,6475167.942,438261.5253,6475422.742,438701.8307,,,
1999,1,110,6,0,1,0,0,0,4,0,,5/8/99,DMONSON,GLBA,H,583.29729,0.233318916,0,6486444.918,435393.2171,6486735.439,435898.1353,,,
1999,2,110,2,0,1,0,0,0,4,0,,5/9/99,DMONSON,GLBA,H,583.29729,0.233318916,0,6486444.918,435393.2171,6486735.439,435898.1353,,,
1999,3,110,4,0,1,0,0,0,4,0,,5/10/199,DMONSON,GLBA,H,583.29729,0.233318916,0,6486444.918,435393.2171,6486735.439,435898.1353,,,
1999,4,110,6,0,1,0,0,0,0,0,,5/12/199,DMONSON,GLBA,H,583.29729,0.233318916,0,6486444.918,435393.2171,6486735.439,435898.1353,,,
1999,5,111,14,0,1,0,0,0,0,0,,5/13/199,DMONSON,GLBA,H,1304.68222,0.521872888,0,6474223.179,446223.0357,6474875.993,447353.9599,,,
1999,1,111,6,0,1,0,0,0,1,0,,5/8/99,DMONSON,GLBA,H,4754.0229,1.90160916,0,6486186.089,430146.9698,6488562.942,434263.3853,,,
1999,2,111,2,0,1,0,0,0,2,0,,5/9/99,DMONSON,GLBA,H,4754.0229,1.90160916,0,6486186.089,430146.9698,6488562.942,434263.3853,,,
1999,3,111,4,0,1,0,0,0,0,0,,5/10/199,DMONSON,GLBA,H,4754.0229,1.90160916,0,6486186.089,430146.9698,6488562.942,434263.3853,,,
1999,4,111,6,0,1,0,0,0,0,0,,5/12/199,DMONSON,GLBA,H,4754.0229,1.90160916,0,6486186.089,430146.9698,6488562.942,434263.3853,,,
1999,5,112,14,0,1,0,0,0,0,0,,5/13/199,DMONSON,GLBA,H,542.37704,0.216950816,0,6472610.185,438630.6677,6472881.274,439100.7157,,,
1999,1,112,6,0,1,0,0,0,4,0,,5/8/99,DMONSON,GLBA,H,579.75404,0.231901616,0,6486169.909,439717.4628,6486459.159,440220.1118,,,
1999,2,112,2,0,1,0,0,0,4,0,,5/9/99,DMONSON,GLBA,H,579.75404,0.231901616,0,6486169.909,439717.4628,6486459.159,440220.1118,,,
1999,3,112,4,0,1,0,0,0,0,0,,5/10/199,DMONSON,GLBA,H,579.75404,0.231901616,0,6486169.909,439717.4628,6486459.159,440220.1118,,,
1999,4,112,6,0,1,0,0,0,0,0,,5/12/199,DMONSON,GLBA,H,579.75404,0.231901616,0,6486169.909,439717.4628,6486459.159,440220.1118,,,
1999,5,113,14,0,1,0,0,0,4,0,,5/13/199,DMONSON,GLBA,H,850.42248,0.340168992,0,6471019.041,445475.3158,6471445.048,446211.3511,,,
1999,1,113,6,0,1,0,0,0,0,0,,5/8/99,DMONSON,GLBA,H,1004.84893,0.401939572,0,6485532.334,448213.6171,6486035.012,449083.6373,,,
1999,2,113,2,0,1,0,0,0,4,0,,5/9/99,DMONSON,GLBA,H,1004.84893,0.401939572,0,6485532.334,448213.6171,6486035.012,449083.6373,,,
1999,3,113,4,0,1,0,0,0,0,0,,5/10/199,DMONSON,GLBA,H,1004.84893,0.401939572,0,6485532.334,448213.6171,6486035.012,449083.6373,,,
1999,4,113,6,0,1,0,0,0,0,0,,5/12/199,DMONSON,GLBA,H,1004.84893,0.401939572,0,6485532.334,448213.6171,6486035.012,449083.6373,,,
1999,5,114,14,1,1,1,1,2,4,0,,5/13/199,DMONSON,GLBA,H,3465.57778,1.386231112,0,6469065.957,437291.6576,6470799.178,440292.127,439226.4549,6470170.297,
1999,1,114,6,0,1,0,0,0,4,0,,5/8/99,DMONSON,GLBA,H,850.99632,0.340398528,0,6483816.4,435640.4117,6484240.533,436377.1457,,,
1999,2,114,2,0,1,0,0,0,4,0,,5/9/99,DMONSON,GLBA,H,850.99632,0.340398528,0,6483816.4,435640.4117,6484240.533,436377.1457,,,
1999,3,114,4,0,1,0,0,0,0,0,,5/10/199,DMONSON,GLBA,H,850.99632,0.340398528,0,6483816.4,435640.4117,6484240.533,436377.1457,,,
1999,4,114,6,0,1,0,0,0,0,0,,5/12/199,DMONSON,GLBA,H,850.99632,0.340398528,0,6483816.4,435640.4117,6484240.533,436377.1457,,,
1999,1,115,6,0,1,0,0,0,1,0,,5/8/99,DMONSON,GLBA,H,9427.13133,3.770852532,0,6483290.41,439531.2195,6488007.643,447693.0719,,,
1999,2,115,2,0,1,0,0,0,3,0,,5/9/99,DMONSON,GLBA,H,9427.13133,3.770852532,0,6483290.41,439531.2195,6488007.643,447693.0719,,,
1999,3,115,4,0,1,0,0,0,1,0,,5/10/199,DMONSON,GLBA,H,9427.13133,3.770852532,0,6483290.41,439531.2195,6488007.643,447693.0719,,,
1999,4,115,6,0,1,0,0,0,0,0,,5/12/199,DMONSON,GLBA,H,9427.13133,3.770852532,0,6483290.41,439531.2195,6488007.643,447693.0719,,,
1999,1,116,6,0,1,0,0,0,0,0,,5/8/99,DMONSON,GLBA,H,460.43919,0.184175676,0,6483173.901,444128.6271,6483403.941,444527.4535,,,
1999,2,116,2,0,1,0,0,0,4,0,,5/9/99,DMONSON,GLBA,H,460.43919,0.184175676,0,6483173.901,444128.6271,6483403.941,444527.4535,,,
1999,3,116,4,0,1,0,0,0,0,0,,5/10/199,DMONSON,GLBA,H,460.43919,0.184175676,0,6483173.901,444128.6271,6483403.941,444527.4535,,,
1999,4,116,6,0,1,0,0,0,0,0,,5/12/199,DMONSON,GLBA,H,460.43919,0.184175676,0,6483173.901,444128.6271,6483403.941,444527.4535,,,
1999,5,117,14,0,1,0,0,0,4,0,,5/13/199,DMONSON,GLBA,H,1717.49126,0.686996504,0,6467735.295,439785.0814,6468592.546,441273.2322,,,
1999,1,117,6,0,1,0,0,0,0,0,,5/8/99,DMONSON,GLBA,H,575.8041,0.23032164,0,6482835.854,448341.2442,6483122.537,448840.6893,,,
1999,2,117,2,0,1,0,0,0,0,0,,5/9/99,DMONSON,GLBA,H,575.8041,0.23032164,0,6482835.854,448341.2442,6483122.537,448840.6893,,,
1999,3,117,4,0,1,0,0,0,0,0,,5/10/199,DMONSON,GLBA,H,575.8041,0.23032164,0,6482835.854,448341.2442,6483122.537,448840.6893,,,
1999,4,117,6,0,1,0,0,0,0,0,,5/12/199,DMONSON,GLBA,H,575.8041,0.23032164,0,6482835.854,448341.2442,6483122.537,448840.6893,,,
1999,1,118,6,0,1,0,0,0,0,0,,5/8/99,DMONSON,GLBA,H,485.01766,0.194007064,0,6482055.822,446992.2898,6482298.853,447412.6111,,,
1999,2,118,2,0,1,0,0,0,0,0,,5/9/99,DMONSON,GLBA,H,485.01766,0.194007064,0,6482055.822,446992.2898,6482298.853,447412.6111,,,
1999,3,118,4,0,1,0,0,0,0,0,,5/10/199,DMONSON,GLBA,H,485.01766,0.194007064,0,6482055.822,446992.2898,6482298.853,447412.6111,,,
1999,4,118,6,0,1,0,0,0,0,0,,5/12/199,DMONSON,GLBA,H,485.01766,0.194007064,0,6482055.822,446992.2898,6482298.853,447412.6111,,,
1999,5,119,14,0,1,0,0,0,4,0,,5/13/199,DMONSON,GLBA,H,678.46475,0.2713859,0,6466221.532,441966.0798,6466561.837,442553.7909,,,
1999,1,119,6,0,1,0,0,0,4,0,,5/8/99,DMONSON,GLBA,H,917.64131,0.367056524,0,6481626.541,436649.7383,6482085.205,437444.6727,,,
1999,2,119,2,0,1,0,0,0,2,0,,5/9/99,DMONSON,GLBA,H,917.64131,0.367056524,0,6481626.541,436649.7383,6482085.205,437444.6727,,,
1999,3,119,4,0,1,0,0,0,1,0,,5/10/199,DMONSON,GLBA,H,917.64131,0.367056524,0,6481626.541,436649.7383,6482085.205,437444.6727,,,
1999,4,119,6,0,1,0,0,0,0,0,,5/12/199,DMONSON,GLBA,H,917.64131,0.367056524,0,6481626.541,436649.7383,6482085.205,437444.6727,,,
1999,1,120,6,0,1,0,0,0,0,0,,5/8/99,DMONSON,GLBA,H,636.14359,0.254457436,0,6481185.686,445482.0659,6481502.853,446032.9187,,,
1999,2,120,2,0,1,0,0,0,0,0,,5/9/99,DMONSON,GLBA,H,636.14359,0.254457436,0,6481185.686,445482.0659,6481502.853,446032.9187,,,
1999,3,120,4,0,1,0,0,0,0,0,,5/10/199,DMONSON,GLBA,H,636.14359,0.254457436,0,6481185.686,445482.0659,6481502.853,446032.9187,,,
1999,4,120,6,0,1,0,0,0,0,0,,5/12/199,DMONSON,GLBA,H,636.14359,0.254457436,0,6481185.686,445482.0659,6481502.853,446032.9187,,,
1999,1,121,6,0,1,0,0,0,4,0,,5/8/99,DMONSON,GLBA,H,1923.30754,0.769323016,0,6480928.064,440235.8186,6481888.553,441901.3588,,,
1999,2,121,2,0,1,0,0,0,4,0,,5/9/99,DMONSON,GLBA,H,1923.30754,0.769323016,0,6480928.064,440235.8186,6481888.553,441901.3588,,,
1999,3,121,4,0,1,0,0,0,3,0,,5/10/199,DMONSON,GLBA,H,1923.30754,0.769323016,0,6480928.064,440235.8186,6481888.553,441901.3588,,,
1999,4,121,6,0,1,0,0,0,0,0,,5/12/199,DMONSON,GLBA,H,1923.30754,0.769323016,0,6480928.064,440235.8186,6481888.553,441901.3588,,,
1999,1,122,6,0,1,0,0,0,4,0,,5/8/99,DMONSON,GLBA,H,777.81581,0.311126324,0,6479738.386,442978.4674,6480127.678,443652.3565,,,
1999,2,122,2,0,1,0,0,0,4,0,,5/9/99,DMONSON,GLBA,H,777.81581,0.311126324,0,6479738.386,442978.4674,6480127.678,443652.3565,,,
1999,3,122,4,0,1,0,0,0,2,0,,5/10/199,DMONSON,GLBA,H,777.81581,0.311126324,0,6479738.386,442978.4674,6480127.678,443652.3565,,,
1999,4,122,6,0,1,0,0,0,0,0,,5/12/199,DMONSON,GLBA,H,777.81581,0.311126324,0,6479738.386,442978.4674,6480127.678,443652.3565,,,
1999,1,123,6,0,1,0,0,0,4,0,,5/8/99,DMONSON,GLBA,H,1878.28782,0.751315128,0,6478830.235,436605.5321,6479769.406,438232.6685,,,
1999,2,123,2,0,1,0,0,0,1,0,,5/9/99,DMONSON,GLBA,H,1878.28782,0.751315128,0,6478830.235,436605.5321,6479769.406,438232.6685,,,
1999,3,123,4,0,1,0,0,0,0,0,,5/10/199,DMONSON,GLBA,H,1878.28782,0.751315128,0,6478830.235,436605.5321,6479769.406,438232.6685,,,
1999,4,123,6,0,1,0,0,0,0,0,,5/12/199,DMONSON,GLBA,H,1878.28782,0.751315128,0,6478830.235,436605.5321,6479769.406,438232.6685,,,
1999,1,124,6,0,1,0,0,0,0,0,,5/8/99,DMONSON,GLBA,H,452.61711,0.181046844,0,6476824.979,437931.2462,6477050.802,438323.237,,,
1999,2,124,2,0,1,0,0,0,4,0,,5/9/99,DMONSON,GLBA,H,452.61711,0.181046844,0,6476824.979,437931.2462,6477050.802,438323.237,,,
1999,3,124,4,0,1,0,0,0,4,0,,5/10/199,DMONSON,GLBA,H,452.61711,0.181046844,0,6476824.979,437931.2462,6477050.802,438323.237,,,
1999,4,124,6,0,1,0,0,0,0,0,,5/12/199,DMONSON,GLBA,H,452.61711,0.181046844,0,6476824.979,437931.2462,6477050.802,438323.237,,,
1999,1,125,6,0,1,0,0,0,0,0,,5/8/99,DMONSON,GLBA,H,1243.93662,0.497574648,0,6475968.29,446047.3079,6476590.216,447124.7845,,,
1999,2,125,2,0,1,0,0,0,3,0,,5/9/99,DMONSON,GLBA,H,1243.93662,0.497574648,0,6475968.29,446047.3079,6476590.216,447124.7845,,,
1999,3,125,4,0,1,0,0,0,0,0,,5/10/199,DMONSON,GLBA,H,1243.93662,0.497574648,0,6475968.29,446047.3079,6476590.216,447124.7845,,,
1999,4,125,6,0,1,0,0,0,0,0,,5/12/199,DMONSON,GLBA,H,1243.93662,0.497574648,0,6475968.29,446047.3079,6476590.216,447124.7845,,,
1999,1,126,6,1,1,1,0,1,0,0,7,5/8/99,DMONSON,GLBA,H,978.62435,0.39144974,0,6474099.14,438009.9459,6474588.839,438857.3387,438661.1946,6474448.631,19991007
1999,2,126,2,1,1,7,3,10,4,0,15,5/9/99,DMONSON,GLBA,H,978.62435,0.39144974,0,6474099.14,438009.9459,6474588.839,438857.3387,438653.2645,6474475.476,19991015
1999,3,126,4,1,1,3,0,3,4,0,19,5/10/199,DMONSON,GLBA,H,978.62435,0.39144974,0,6474099.14,438009.9459,6474588.839,438857.3387,438548.938,6474412.635,19991019
1999,3,126,4,2,1,2,0,2,4,0,19,5/10/199,DMONSON,GLBA,H,978.62435,0.39144974,0,6474099.14,438009.9459,6474588.839,438857.3387,438687.736,6474472.12,19992019
1999,3,126,4,3,1,1,0,1,4,0,19,5/10/199,DMONSON,GLBA,H,978.62435,0.39144974,0,6474099.14,438009.9459,6474588.839,438857.3387,438786.8775,6474571.262,19993019
1999,4,126,6,0,1,0,0,0,0,0,,5/12/199,DMONSON,GLBA,H,978.62435,0.39144974,0,6474099.14,438009.9459,6474588.839,438857.3387,,,
1999,1,127,6,1,1,1,0,1,4,0,10,5/8/99,DMONSON,GLBA,H,889.05153,0.355620612,0,6473280.821,446190.6559,6473723.2,446960.5136,446864.6125,6473663.736,19991010
1999,2,127,2,0,1,0,0,0,0,0,,5/9/99,DMONSON,GLBA,H,889.05153,0.355620612,0,6473280.821,446190.6559,6473723.2,446960.5136,,,
1999,3,127,4,0,1,0,0,0,3,0,,5/10/199,DMONSON,GLBA,H,889.05153,0.355620612,0,6473280.821,446190.6559,6473723.2,446960.5136,,,
1999,4,127,6,0,1,0,0,0,0,0,,5/12/199,DMONSON,GLBA,H,889.05153,0.355620612,0,6473280.821,446190.6559,6473723.2,446960.5136,,,
1999,1,128,6,1,1,1,0,1,4,0,,5/8/99,DMONSON,GLBA,H,400.16408,0.160065632,0,6471978.704,439137.4246,6472179.375,439483.6182,439319.4928,6472093.945,
1999,2,128,2,0,1,0,0,0,4,0,,5/9/99,DMONSON,GLBA,H,400.16408,0.160065632,0,6471978.704,439137.4246,6472179.375,439483.6182,,,
1999,3,128,4,0,1,0,0,0,4,0,,5/10/199,DMONSON,GLBA,H,400.16408,0.160065632,0,6471978.704,439137.4246,6472179.375,439483.6182,,,
1999,4,128,6,0,1,0,0,0,0,0,,5/12/199,DMONSON,GLBA,H,400.16408,0.160065632,0,6471978.704,439137.4246,6472179.375,439483.6182,,,
1999,1,129,6,0,1,0,0,0,4,0,,5/8/99,DMONSON,GLBA,H,856.83787,0.342735148,0,6470172.449,450409.3322,6470601.159,451150.8431,,,
1999,2,129,2,0,1,0,0,0,0,0,,5/9/99,DMONSON,GLBA,H,856.83787,0.342735148,0,6470172.449,450409.3322,6470601.159,451150.8431,,,
1999,3,129,4,0,1,0,0,0,0,0,,5/10/199,DMONSON,GLBA,H,856.83787,0.342735148,0,6470172.449,450409.3322,6470601.159,451150.8431,,,
1999,4,129,6,1,1,1,0,1,4,0,32,5/12/199,DMONSON,GLBA,H,856.83787,0.342735148,0,6470172.449,450409.3322,6470601.159,451150.8431,450990.4285,6470479.008,19991032
1999,1,130,6,0,1,0,0,0,4,0,,5/8/99,DMONSON,GLBA,H,2846.07598,1.138430392,0,6470129.273,445532.2226,6471547.221,447998.5331,,,
1999,2,130,2,0,1,0,0,0,0,0,,5/9/99,DMONSON,GLBA,H,2846.07598,1.138430392,0,6470129.273,445532.2226,6471547.221,447998.5331,,,
1999,3,130,4,0,1,0,0,0,2,0,,5/10/199,DMONSON,GLBA,H,2846.07598,1.138430392,0,6470129.273,445532.2226,6471547.221,447998.5331,,,
1999,4,130,6,0,1,0,0,0,0,0,,5/12/199,DMONSON,GLBA,H,2846.07598,1.138430392,0,6470129.273,445532.2226,6471547.221,447998.5331,,,
1999,1,131,6,0,1,0,0,0,0,0,,5/8/99,DMONSON,GLBA,H,2806.04723,1.122418892,0,6467729.996,446178.1337,6469133.989,448608.4282,,,
1999,2,131,2,0,1,0,0,0,3,0,,5/9/99,DMONSON,GLBA,H,2806.04723,1.122418892,0,6467729.996,446178.1337,6469133.989,448608.4282,,,
1999,3,131,4,1,1,2,0,2,0,0,17,5/10/199,DMONSON,GLBA,H,2806.04723,1.122418892,0,6467729.996,446178.1337,6469133.989,448608.4282,447194.072,6468246.038,19991017
1999,4,131,6,0,1,0,0,0,3,0,,5/12/199,DMONSON,GLBA,H,2806.04723,1.122418892,0,6467729.996,446178.1337,6469133.989,448608.4282,,,
1999,1,132,6,0,1,0,0,0,0,0,,5/8/99,DMONSON,GLBA,H,1459.7842,0.58391368,0,6467199.805,440460.0327,6467928.851,441723.8736,,,
1999,2,132,2,0,1,0,0,0,4,0,,5/9/99,DMONSON,GLBA,H,1459.7842,0.58391368,0,6467199.805,440460.0327,6467928.851,441723.8736,,,
1999,3,132,4,0,1,0,0,0,4,0,,5/10/199,DMONSON,GLBA,H,1459.7842,0.58391368,0,6467199.805,440460.0327,6467928.851,441723.8736,,,
1999,4,132,6,0,1,0,0,0,0,0,,5/12/199,DMONSON,GLBA,H,1459.7842,0.58391368,0,6467199.805,440460.0327,6467928.851,441723.8736,,,
1999,5,136,14,0,1,0,0,0,0,0,,5/13/199,DMONSON,GLBA,H,4802.65686,1.921062744,0,6508463.995,438337.4395,6510866.879,442495.5014,,,
1999,5,137,14,0,1,0,0,0,0,0,,5/13/199,DMONSON,GLBA,H,1906.37413,0.762549652,0,6507708.547,441828.6304,6508662.301,443479.6106,,,
1999,5,139,14,0,1,0,0,0,0,0,,5/13/199,DMONSON,GLBA,H,6898.87214,2.759548856,0,6500465.049,438881.0815,6503913.414,444854.8616,,,
1999,5,140,14,0,1,0,0,0,0,0,,5/13/199,DMONSON,GLBA,H,2594.25423,1.037701692,0,6497941.337,429710.9602,6499239.746,431957.0322,,,
1999,5,141,14,0,1,0,0,0,0,0,,5/13/199,DMONSON,GLBA,H,3555.99876,1.422399504,0,6493981.833,442048.7111,6495759.89,445128.7672,,,
1999,5,142,14,0,1,0,0,0,0,0,,5/13/199,DMONSON,GLBA,H,1474.84302,0.589937208,0,6491316.393,447033.198,6492054.652,448310.5855,,,
1999,5,143,14,1,1,2,0,2,0,0,,5/13/199,DMONSON,GLBA,H,6171.92974,2.468771896,0,6487745.156,440844.5731,6490830.526,446189.503,441196.7759,6488084.697,
1999,5,143,14,2,1,51,4,55,0,0,,5/13/199,DMONSON,GLBA,H,6171.92974,2.468771896,1,6487745.156,440844.5731,6490830.526,446189.503,441188.5399,6487945.594,
1999,1,143,6,0,1,0,0,0,0,0,,5/8/99,DMONSON,GLBA,H,1267.47702,0.506990808,0,6509558.941,441834.1381,6510194.11,442932.4288,,,
1999,2,143,2,0,1,0,0,0,0,0,,5/9/99,DMONSON,GLBA,H,1267.47702,0.506990808,0,6509558.941,441834.1381,6510194.11,442932.4288,,,
1999,3,143,4,0,1,0,0,0,0,0,,5/10/199,DMONSON,GLBA,H,1267.47702,0.506990808,0,6509558.941,441834.1381,6510194.11,442932.4288,,,
1999,4,143,6,0,1,0,0,0,0,0,,5/12/199,DMONSON,GLBA,H,1267.47702,0.506990808,0,6509558.941,441834.1381,6510194.11,442932.4288,,,
1999,5,144,14,1,1,1,0,1,0,0,46,5/13/199,DMONSON,GLBA,H,1208.42626,0.483370504,0,6486550.202,433978.0241,6487154.486,435023.3233,434909.9902,6487046.305,19991046
1999,1,144,6,0,1,0,0,0,0,0,,5/8/99,DMONSON,GLBA,H,1313.38039,0.525352156,0,6508508.288,440012.619,6509164.64,441149.4923,,,
1999,2,144,2,0,1,0,0,0,0,0,,5/9/99,DMONSON,GLBA,H,1313.38039,0.525352156,0,6508508.288,440012.619,6509164.64,441149.4923,,,
1999,3,144,4,0,1,0,0,0,0,0,,5/10/199,DMONSON,GLBA,H,1313.38039,0.525352156,0,6508508.288,440012.619,6509164.64,441149.4923,,,
1999,4,144,6,0,1,0,0,0,4,0,,5/12/199,DMONSON,GLBA,H,1313.38039,0.525352156,0,6508508.288,440012.619,6509164.64,441149.4923,,,
1999,5,145,14,0,1,0,0,0,0,0,,5/13/199,DMONSON,GLBA,H,687.39452,0.274957808,0,6486043.802,433085.5955,6486386.322,433680.9813,,,
1999,1,145,6,0,1,0,0,0,2,0,,5/8/99,DMONSON,GLBA,H,1909.74811,0.763899244,0,6504035.48,427465.5394,6504990.626,429118.9332,,,
1999,2,145,2,0,1,0,0,0,2,0,,5/9/99,DMONSON,GLBA,H,1909.74811,0.763899244,0,6504035.48,427465.5394,6504990.626,429118.9332,,,
1999,3,145,4,0,1,0,0,0,4,0,,5/10/199,DMONSON,GLBA,H,1909.74811,0.763899244,0,6504035.48,427465.5394,6504990.626,429118.9332,,,
1999,4,145,6,0,1,0,0,0,4,0,,5/12/199,DMONSON,GLBA,H,1909.74811,0.763899244,0,6504035.48,427465.5394,6504990.626,429118.9332,,,
1999,5,146,14,0,1,0,0,0,3,0,,5/13/199,DMONSON,GLBA,H,5398.23619,2.159294476,0,6485969.432,428170.2574,6488666.866,432844.0971,,,
1999,1,146,6,1,1,4,0,4,1,0,1,5/8/99,DMONSON,GLBA,H,4042.24524,1.616898096,0,6501082.931,441552.3919,6503105.103,445053.2335,444050.8283,6502536.775,19991001
1999,2,146,2,0,1,0,0,0,0,0,,5/9/99,DMONSON,GLBA,H,4042.24524,1.616898096,0,6501082.931,441552.3919,6503105.103,445053.2335,,,
1999,3,146,4,0,1,0,0,0,0,0,,5/10/199,DMONSON,GLBA,H,4042.24524,1.616898096,0,6501082.931,441552.3919,6503105.103,445053.2335,,,
1999,4,146,6,1,1,1,0,1,4,0,,5/12/199,DMONSON,GLBA,H,4042.24524,1.616898096,0,6501082.931,441552.3919,6503105.103,445053.2335,442053.0533,6501368.431,
1999,5,147,14,0,1,0,0,0,1,0,,5/13/199,DMONSON,GLBA,H,6489.1332,2.59565328,0,6483975.062,443911.6973,6487222.583,449530.1528,,,
1999,1,147,6,1,1,2,0,2,4,0,,5/8/99,DMONSON,GLBA,H,781.1414,0.31245656,0,6499898.582,439499.3334,6500289.035,440176.0197,439702.0274,6500090.575,
1999,2,147,2,0,1,0,0,0,0,0,,5/9/99,DMONSON,GLBA,H,781.1414,0.31245656,0,6499898.582,439499.3334,6500289.035,440176.0197,,,
1999,3,147,4,1,1,1,0,1,0,0,29,5/10/199,DMONSON,GLBA,H,781.1414,0.31245656,0,6499898.582,439499.3334,6500289.035,440176.0197,439654.7446,6500012.176,19991029
1999,4,147,6,3,1,1,0,1,4,0,,5/12/199,DMONSON,GLBA,H,781.1414,0.31245656,0,6499898.582,439499.3334,6500289.035,440176.0197,440009.2148,6500270.25,
1999,4,147,6,1,1,1,0,1,4,0,43,5/12/199,DMONSON,GLBA,H,781.1414,0.31245656,0,6499898.582,439499.3334,6500289.035,440176.0197,439597.3963,6499934.694,19991043
1999,4,147,6,2,1,1,0,1,4,0,43,5/12/199,DMONSON,GLBA,H,781.1414,0.31245656,0,6499898.582,439499.3334,6500289.035,440176.0197,439688.9118,6500056.714,19992043
1999,5,148,14,0,1,0,0,0,0,0,,5/13/199,DMONSON,GLBA,H,1799.4912,0.71979648,0,6483087.126,447173.4058,6483986.964,448731.4878,,,
1999,1,148,6,0,1,0,0,0,2,0,,5/8/99,DMONSON,GLBA,H,2675.50803,1.070203212,0,6498971.351,428292.8101,6500308.508,430610.1512,,,
1999,2,148,2,0,1,0,0,0,4,0,,5/9/99,DMONSON,GLBA,H,2675.50803,1.070203212,0,6498971.351,428292.8101,6500308.508,430610.1512,,,
1999,3,148,4,0,1,0,0,0,2,0,,5/10/199,DMONSON,GLBA,H,2675.50803,1.070203212,0,6498971.351,428292.8101,6500308.508,430610.1512,,,
1999,4,148,6,0,1,0,0,0,4,0,,5/12/199,DMONSON,GLBA,H,2675.50803,1.070203212,0,6498971.351,428292.8101,6500308.508,430610.1512,,,
1999,5,149,14,0,1,0,0,0,0,0,,5/13/199,DMONSON,GLBA,H,1862.22917,0.744891668,0,6482094.157,435857.1288,6483023.955,437469.3751,,,
1999,5,150,14,0,1,0,0,0,0,0,,5/13/199,DMONSON,GLBA,H,1093.06441,0.437225764,0,6481586.345,449373.8554,6482132.867,450319.9902,,,
1999,1,150,6,0,1,0,0,0,4,0,,5/8/99,DMONSON,GLBA,H,1209.93792,0.483975168,0,6496851.056,434220.6531,6497455.3,435269.0355,,,
1999,2,150,2,0,1,0,0,0,4,0,,5/9/99,DMONSON,GLBA,H,1209.93792,0.483975168,0,6496851.056,434220.6531,6497455.3,435269.0355,,,
1999,3,150,4,0,1,0,0,0,0,0,,5/10/199,DMONSON,GLBA,H,1209.93792,0.483975168,0,6496851.056,434220.6531,6497455.3,435269.0355,,,
1999,4,150,6,0,1,0,0,0,3,0,,5/12/199,DMONSON,GLBA,H,1209.93792,0.483975168,0,6496851.056,434220.6531,6497455.3,435269.0355,,,
1999,5,151,14,0,1,0,0,0,0,0,,5/13/199,DMONSON,GLBA,H,3743.74769,1.497499076,0,6478924.057,444764.685,6480795.069,448006.0693,,,
1999,1,151,6,0,1,0,0,0,4,0,,5/8/99,DMONSON,GLBA,H,2709.36628,1.083746512,0,6495475.652,441444.9905,6496829.431,443790.7802,,,
1999,2,151,2,0,1,0,0,0,4,0,,5/9/99,DMONSON,GLBA,H,2709.36628,1.083746512,0,6495475.652,441444.9905,6496829.431,443790.7802,,,
1999,3,151,4,0,1,0,0,0,4,0,,5/10/199,DMONSON,GLBA,H,2709.36628,1.083746512,0,6495475.652,441444.9905,6496829.431,443790.7802,,,
1999,4,151,6,0,1,0,0,0,0,0,,5/12/199,DMONSON,GLBA,H,2709.36628,1.083746512,0,6495475.652,441444.9905,6496829.431,443790.7802,,,
1999,5,152,14,0,1,0,0,0,0,0,,5/13/199,DMONSON,GLBA,H,893.47451,0.357389804,0,6477649.861,437762.2693,6478097.969,438535.304,,,
1999,1,152,6,0,1,0,0,0,0,0,,5/8/99,DMONSON,GLBA,H,1032.52044,0.413008176,0,6493887.653,429088.2283,6494402.38,429981.5541,,,
1999,2,152,2,0,1,0,0,0,3,0,,5/9/99,DMONSON,GLBA,H,1032.52044,0.413008176,0,6493887.653,429088.2283,6494402.38,429981.5541,,,
1999,3,152,4,0,1,0,0,0,0,0,,5/10/199,DMONSON,GLBA,H,1032.52044,0.413008176,0,6493887.653,429088.2283,6494402.38,429981.5541,,,
1999,4,152,6,0,1,0,0,0,0,0,,5/12/199,DMONSON,GLBA,H,1032.52044,0.413008176,0,6493887.653,429088.2283,6494402.38,429981.5541,,,
1999,1,153,6,0,1,0,0,0,3,0,,5/8/99,DMONSON,GLBA,H,3633.79104,1.453516416,0,6492229.004,431016.1363,6494045.629,434162.6735,,,
1999,2,153,2,0,1,0,0,0,4,0,,5/9/99,DMONSON,GLBA,H,3633.79104,1.453516416,0,6492229.004,431016.1363,6494045.629,434162.6735,,,
1999,3,153,4,0,1,0,0,0,0,0,,5/10/199,DMONSON,GLBA,H,3633.79104,1.453516416,0,6492229.004,431016.1363,6494045.629,434162.6735,,,
1999,4,153,6,1,1,1,0,1,2,0,42,5/12/199,DMONSON,GLBA,H,3633.79104,1.453516416,0,6492229.004,431016.1363,6494045.629,434162.6735,433984.4628,6493950.821,19991042
1999,1,154,6,0,1,0,0,0,0,0,,5/8/99,DMONSON,GLBA,H,2311.06833,0.924427332,0,6491566.457,444266.7737,6492722.524,446267.9134,,,
1999,2,154,2,0,1,0,0,0,2,0,,5/9/99,DMONSON,GLBA,H,2311.06833,0.924427332,0,6491566.457,444266.7737,6492722.524,446267.9134,,,
1999,3,154,4,0,1,0,0,0,0,0,,5/10/199,DMONSON,GLBA,H,2311.06833,0.924427332,0,6491566.457,444266.7737,6492722.524,446267.9134,,,
1999,4,154,6,0,1,0,0,0,0,0,,5/12/199,DMONSON,GLBA,H,2311.06833,0.924427332,0,6491566.457,444266.7737,6492722.524,446267.9134,,,
1999,1,155,6,0,1,0,0,0,0,0,,5/8/99,DMONSON,GLBA,H,1270.09811,0.508039244,0,6489751.354,431529.3953,6490385.59,432629.1146,,,
1999,2,155,2,0,1,0,0,0,0,0,,5/9/99,DMONSON,GLBA,H,1270.09811,0.508039244,0,6489751.354,431529.3953,6490385.59,432629.1146,,,
1999,3,155,4,0,1,0,0,0,0,0,,5/10/199,DMONSON,GLBA,H,1270.09811,0.508039244,0,6489751.354,431529.3953,6490385.59,432629.1146,,,
1999,4,155,6,0,1,0,0,0,0,0,,5/12/199,DMONSON,GLBA,H,1270.09811,0.508039244,0,6489751.354,431529.3953,6490385.59,432629.1146,,,
1999,1,156,6,1,1,5,0,5,4,0,4,5/8/99,DMONSON,GLBA,H,3869.5128,1.54780512,0,6489423.681,440553.6079,6491358.213,443903.9742,440665.6832,6489539.79,19991004
1999,1,156,6,2,1,1,0,1,4,0,,5/8/99,DMONSON,GLBA,H,3869.5128,1.54780512,0,6489423.681,440553.6079,6491358.213,443903.9742,441752.8836,6490132.809,
1999,2,156,2,1,1,1,0,1,4,0,12,5/9/99,DMONSON,GLBA,H,3869.5128,1.54780512,0,6489423.681,440553.6079,6491358.213,443903.9742,440735.2331,6489641.676,19991012
1999,2,156,2,2,1,1,0,1,4,0,12,5/9/99,DMONSON,GLBA,H,3869.5128,1.54780512,0,6489423.681,440553.6079,6491358.213,443903.9742,440910.3321,6489566.633,19992012
1999,3,156,4,3,1,4,0,4,0,0,,5/10/199,DMONSON,GLBA,H,3869.5128,1.54780512,0,6489423.681,440553.6079,6491358.213,443903.9742,441155.8008,6489700.089,
1999,3,156,4,4,1,3,0,3,0,0,,5/10/199,DMONSON,GLBA,H,3869.5128,1.54780512,0,6489423.681,440553.6079,6491358.213,443903.9742,440854.0569,6489519.042,
1999,3,156,4,1,1,2,0,2,0,0,23,5/10/199,DMONSON,GLBA,H,3869.5128,1.54780512,0,6489423.681,440553.6079,6491358.213,443903.9742,441658.707,6490122.53,19991023
1999,3,156,4,2,1,1,0,1,0,0,23,5/10/199,DMONSON,GLBA,H,3869.5128,1.54780512,0,6489423.681,440553.6079,6491358.213,443903.9742,441517.8929,6490042.065,19992023
1999,4,156,6,3,1,23,0,23,0,0,,5/12/199,DMONSON,GLBA,H,3869.5128,1.54780512,0,6489423.681,440553.6079,6491358.213,443903.9742,441774.8449,6490091.321,
1999,4,156,6,4,1,2,0,2,0,0,,5/12/199,DMONSON,GLBA,H,3869.5128,1.54780512,0,6489423.681,440553.6079,6491358.213,443903.9742,441906.6263,6490201.139,
1999,4,156,6,5,1,1,0,1,0,0,,5/12/199,DMONSON,GLBA,H,3869.5128,1.54780512,0,6489423.681,440553.6079,6491358.213,443903.9742,442148.2261,6490288.993,
1999,4,156,6,1,1,2,0,2,0,0,40,5/12/199,DMONSON,GLBA,H,3869.5128,1.54780512,0,6489423.681,440553.6079,6491358.213,443903.9742,441379.4996,6489981.502,19991040
1999,4,156,6,2,1,1,0,1,0,0,40,5/12/199,DMONSON,GLBA,H,3869.5128,1.54780512,0,6489423.681,440553.6079,6491358.213,443903.9742,441247.7173,6489783.83,19992040
1999,1,157,6,0,1,0,0,0,0,0,,5/8/99,DMONSON,GLBA,H,4224.08493,1.689633972,0,6489320.99,445167.2857,6491435.431,448824.1614,,,
1999,2,157,2,0,1,0,0,0,2,0,,5/9/99,DMONSON,GLBA,H,4224.08493,1.689633972,0,6489320.99,445167.2857,6491435.431,448824.1614,,,
1999,3,157,4,0,1,0,0,0,0,0,,5/10/199,DMONSON,GLBA,H,4224.08493,1.689633972,0,6489320.99,445167.2857,6491435.431,448824.1614,,,
1999,4,157,6,0,1,0,0,0,0,0,,5/12/199,DMONSON,GLBA,H,4224.08493,1.689633972,0,6489320.99,445167.2857,6491435.431,448824.1614,,,
1999,1,158,6,0,1,0,0,0,0,0,,5/8/99,DMONSON,GLBA,H,1846.98872,0.738795488,0,6484034.508,445618.851,6484959.156,447218.0757,,,
1999,2,158,2,0,1,0,0,0,4,0,,5/9/99,DMONSON,GLBA,H,1846.98872,0.738795488,0,6484034.508,445618.851,6484959.156,447218.0757,,,
1999,3,158,4,0,1,0,0,0,0,0,,5/10/199,DMONSON,GLBA,H,1846.98872,0.738795488,0,6484034.508,445618.851,6484959.156,447218.0757,,,
1999,4,158,6,0,1,0,0,0,0,0,,5/12/199,DMONSON,GLBA,H,1846.98872,0.738795488,0,6484034.508,445618.851,6484959.156,447218.0757,,,
1999,1,159,6,0,1,0,0,0,0,0,,5/8/99,DMONSON,GLBA,H,5117.89823,2.047159292,0,6478324.134,445327.4577,6480883.566,449759.5918,,,
1999,2,159,2,0,1,0,0,0,3,0,,5/9/99,DMONSON,GLBA,H,5117.89823,2.047159292,0,6478324.134,445327.4577,6480883.566,449759.5918,,,
1999,3,159,4,0,1,0,0,0,0,0,,5/10/199,DMONSON,GLBA,H,5117.89823,2.047159292,0,6478324.134,445327.4577,6480883.566,449759.5918,,,
1999,4,159,6,0,1,0,0,0,4,0,,5/12/199,DMONSON,GLBA,H,5117.89823,2.047159292,0,6478324.134,445327.4577,6480883.566,449759.5918,,,
1999,1,160,6,0,1,0,0,0,2,0,,5/8/99,DMONSON,GLBA,H,1953.51997,0.781407988,0,6468862.519,438540.9823,6469840.551,440232.7218,,,
1999,2,160,2,0,1,0,0,0,4,0,,5/9/99,DMONSON,GLBA,H,1953.51997,0.781407988,0,6468862.519,438540.9823,6469840.551,440232.7218,,,
1999,3,160,4,0,1,0,0,0,4,0,,5/10/199,DMONSON,GLBA,H,1953.51997,0.781407988,0,6468862.519,438540.9823,6469840.551,440232.7218,,,
1999,4,160,6,0,1,0,0,0,0,0,,5/12/199,DMONSON,GLBA,H,1953.51997,0.781407988,0,6468862.519,438540.9823,6469840.551,440232.7218,,,
1999,5,223,14,0,1,0,0,0,0,0,,5/13/199,DMONSON,GLBA,H,1850.55044,0.740220176,0,6510972.726,440280.3728,6511896.823,441883.6433,,,
1999,5,226,14,0,1,0,0,0,0,0,,5/13/199,DMONSON,GLBA,H,981.01902,0.392407608,0,6509292.207,442170.9466,6509782.639,443020.0151,,,
1999,5,227,14,0,1,0,0,0,0,0,,5/13/199,DMONSON,GLBA,H,402.79278,0.161117112,0,6508556.008,440894.9932,6508756.738,441243.731,,,
1999,5,230,14,0,1,0,0,0,0,0,,5/13/199,DMONSON,GLBA,H,632.83602,0.253134408,0,6506774.054,433010.3813,6507091.333,433557.8227,,,
1999,1,231,6,0,1,0,0,0,0,0,,5/8/99,DMONSON,GLBA,H,432.38761,0.172955044,0,6512797.82,440242.8733,6513012.936,440617.537,,,
1999,2,231,2,0,1,0,0,0,0,0,,5/9/99,DMONSON,GLBA,H,432.38761,0.172955044,0,6512797.82,440242.8733,6513012.936,440617.537,,,
1999,3,231,4,0,1,0,0,0,0,0,,5/10/199,DMONSON,GLBA,H,432.38761,0.172955044,0,6512797.82,440242.8733,6513012.936,440617.537,,,
1999,4,231,6,0,1,0,0,0,0,0,,5/12/199,DMONSON,GLBA,H,432.38761,0.172955044,0,6512797.82,440242.8733,6513012.936,440617.537,,,
1999,5,233,14,0,1,0,0,0,0,0,,5/13/199,DMONSON,GLBA,H,433.34872,0.173339488,0,6504481.652,429038.1137,6504697.565,429413.2733,,,
1999,5,234,14,0,1,0,0,0,0,0,,5/13/199,DMONSON,GLBA,H,1482.62586,0.593050344,0,6504398.007,443293.8245,6505140.467,444577.4877,,,
1999,5,236,14,0,1,0,0,0,0,0,,5/13/199,DMONSON,GLBA,H,990.88584,0.396354336,0,6503959.648,437733.2208,6504454.561,438591.8301,,,
1999,5,237,14,0,1,0,0,0,0,0,,5/13/199,DMONSON,GLBA,H,584.57645,0.23383058,0,6503481.559,427308.2196,6503774.688,427814.5854,,,
1999,1,237,6,0,1,0,0,0,0,0,,5/8/99,DMONSON,GLBA,H,1192.24307,0.476897228,0,6507919.27,441392.348,6508514.464,442424.9141,,,
1999,2,237,2,0,1,0,0,0,0,0,,5/9/99,DMONSON,GLBA,H,1192.24307,0.476897228,0,6507919.27,441392.348,6508514.464,442424.9141,,,
1999,3,237,4,0,1,0,0,0,0,0,,5/10/199,DMONSON,GLBA,H,1192.24307,0.476897228,0,6507919.27,441392.348,6508514.464,442424.9141,,,
1999,4,237,6,0,1,0,0,0,2,0,,5/12/199,DMONSON,GLBA,H,1192.24307,0.476897228,0,6507919.27,441392.348,6508514.464,442424.9141,,,
1999,5,238,14,0,1,0,0,0,0,0,,5/13/199,DMONSON,GLBA,H,698.23851,0.279295404,0,6503272.508,441341.5909,6503619.811,441945.3161,,,
1999,5,239,14,0,1,0,0,0,0,0,,5/13/199,DMONSON,GLBA,H,534.15172,0.213660688,0,6502539.723,425677.1921,6502807.49,426139.8034,,,
1999,5,240,14,0,1,0,0,0,0,0,,5/13/199,DMONSON,GLBA,H,417.10416,0.166841664,0,6501983.919,429512.0336,6502192.718,429872.7616,,,
1999,5,241,14,0,1,0,0,0,0,0,,5/13/199,DMONSON,GLBA,H,4096.41696,1.638566784,0,6500651.589,441602.0377,6502699.144,445149.0424,,,
1999,1,241,6,0,1,0,0,0,1,0,,5/8/99,DMONSON,GLBA,H,2714.77379,1.085909516,0,6505766.933,442465.3567,6507126.738,444814.4525,,,
1999,2,241,2,0,1,0,0,0,0,0,,5/9/99,DMONSON,GLBA,H,2714.77379,1.085909516,0,6505766.933,442465.3567,6507126.738,444814.4525,,,
1999,3,241,4,0,1,0,0,0,1,0,,5/10/199,DMONSON,GLBA,H,2714.77379,1.085909516,0,6505766.933,442465.3567,6507126.738,444814.4525,,,
1999,4,241,6,0,1,0,0,0,0,0,,5/12/199,DMONSON,GLBA,H,2714.77379,1.085909516,0,6505766.933,442465.3567,6507126.738,444814.4525,,,
1999,5,243,14,0,1,0,0,0,0,0,,5/13/199,DMONSON,GLBA,H,1735.68254,0.694273016,0,6500460.387,426874.3382,6501328.977,428377.8065,,,
1999,5,244,14,0,1,0,0,0,0,0,,5/13/199,DMONSON,GLBA,H,667.48911,0.266995644,0,6500377.523,445929.137,6500711.035,446507.524,,,
1999,1,244,6,0,1,0,0,0,0,0,,5/8/99,DMONSON,GLBA,H,501.24179,0.200496716,0,6503578.389,424275.4755,6503827.976,424709.6759,,,
1999,2,244,2,0,1,0,0,0,0,0,,5/9/99,DMONSON,GLBA,H,501.24179,0.200496716,0,6503578.389,424275.4755,6503827.976,424709.6759,,,
1999,3,244,4,0,1,0,0,0,3,0,,5/10/199,DMONSON,GLBA,H,501.24179,0.200496716,0,6503578.389,424275.4755,6503827.976,424709.6759,,,
1999,4,244,6,0,1,0,0,0,4,0,,5/12/199,DMONSON,GLBA,H,501.24179,0.200496716,0,6503578.389,424275.4755,6503827.976,424709.6759,,,
1999,5,245,14,0,1,0,0,0,0,0,,5/13/199,DMONSON,GLBA,H,2759.19673,1.103678692,0,6498723.257,428662.9419,6500102.042,431052.6481,,,
1999,1,245,6,0,1,0,0,0,3,0,,5/8/99,DMONSON,GLBA,H,819.38034,0.327752136,0,6503313.462,438216.0339,6503723.602,438924.4925,,,
1999,2,245,2,0,1,0,0,0,4,0,,5/9/99,DMONSON,GLBA,H,819.38034,0.327752136,0,6503313.462,438216.0339,6503723.602,438924.4925,,,
1999,3,245,4,0,1,0,0,0,0,0,,5/10/199,DMONSON,GLBA,H,819.38034,0.327752136,0,6503313.462,438216.0339,6503723.602,438924.4925,,,
1999,4,245,6,0,1,0,0,0,4,0,,5/12/199,DMONSON,GLBA,H,819.38034,0.327752136,0,6503313.462,438216.0339,6503723.602,438924.4925,,,
1999,1,246,6,0,1,0,0,0,0,0,,5/8/99,DMONSON,GLBA,H,1696.9108,0.67876432,0,6501913.658,426192.4946,6502762.202,427661.3549,,,
1999,2,246,2,0,1,0,0,0,3,0,,5/9/99,DMONSON,GLBA,H,1696.9108,0.67876432,0,6501913.658,426192.4946,6502762.202,427661.3549,,,
1999,3,246,4,0,1,0,0,0,0,0,,5/10/199,DMONSON,GLBA,H,1696.9108,0.67876432,0,6501913.658,426192.4946,6502762.202,427661.3549,,,
1999,4,246,6,0,1,0,0,0,4,0,,5/12/199,DMONSON,GLBA,H,1696.9108,0.67876432,0,6501913.658,426192.4946,6502762.202,427661.3549,,,
1999,1,247,6,0,1,0,0,0,4,0,,5/8/99,DMONSON,GLBA,H,582.11502,0.232846008,0,6501786.848,430770.9632,6502076.767,431274.3051,,,
1999,2,247,2,0,1,0,0,0,4,0,,5/9/99,DMONSON,GLBA,H,582.11502,0.232846008,0,6501786.848,430770.9632,6502076.767,431274.3051,,,
1999,3,247,4,0,1,0,0,0,4,0,,5/10/199,DMONSON,GLBA,H,582.11502,0.232846008,0,6501786.848,430770.9632,6502076.767,431274.3051,,,
1999,4,247,6,0,1,0,0,0,4,0,,5/12/199,DMONSON,GLBA,H,582.11502,0.232846008,0,6501786.848,430770.9632,6502076.767,431274.3051,,,
1999,5,248,14,0,1,0,0,0,0,0,,5/13/199,DMONSON,GLBA,H,486.1255,0.1944502,0,6498054.306,446703.4034,6498297.277,447123.9947,,,
1999,1,248,6,0,1,0,0,0,0,0,,5/8/99,DMONSON,GLBA,H,1402.28341,0.560913364,0,6501247.725,444236.6176,6501948.792,445450.888,,,
1999,2,248,2,0,1,0,0,0,0,0,,5/9/99,DMONSON,GLBA,H,1402.28341,0.560913364,0,6501247.725,444236.6176,6501948.792,445450.888,,,
1999,3,248,4,0,1,0,0,0,0,0,,5/10/199,DMONSON,GLBA,H,1402.28341,0.560913364,0,6501247.725,444236.6176,6501948.792,445450.888,,,
1999,4,248,6,0,1,0,0,0,4,0,,5/12/199,DMONSON,GLBA,H,1402.28341,0.560913364,0,6501247.725,444236.6176,6501948.792,445450.888,,,
1999,5,249,14,0,1,0,0,0,0,0,,5/13/199,DMONSON,GLBA,H,2082.51238,0.833004952,0,6496841.093,430202.5749,6497880.212,432005.9198,,,
1999,1,249,6,0,1,0,0,0,0,0,,5/8/99,DMONSON,GLBA,H,639.0812,0.25563248,0,6501095.549,429574.3234,6501414.117,430127.7062,,,
1999,2,249,2,0,1,0,0,0,4,0,,5/9/99,DMONSON,GLBA,H,639.0812,0.25563248,0,6501095.549,429574.3234,6501414.117,430127.7062,,,
1999,3,249,4,0,1,0,0,0,4,0,,5/10/199,DMONSON,GLBA,H,639.0812,0.25563248,0,6501095.549,429574.3234,6501414.117,430127.7062,,,
1999,4,249,6,0,1,0,0,0,4,0,,5/12/199,DMONSON,GLBA,H,639.0812,0.25563248,0,6501095.549,429574.3234,6501414.117,430127.7062,,,
1999,1,250,6,0,1,0,0,0,2,0,,5/8/99,DMONSON,GLBA,H,1330.6234,0.53224936,0,6500130.741,442302.6047,6500796.85,443455.1551,,,
1999,2,250,2,0,1,0,0,0,0,0,,5/9/99,DMONSON,GLBA,H,1330.6234,0.53224936,0,6500130.741,442302.6047,6500796.85,443455.1551,,,
1999,3,250,4,0,1,0,0,0,0,0,,5/10/199,DMONSON,GLBA,H,1330.6234,0.53224936,0,6500130.741,442302.6047,6500796.85,443455.1551,,,
1999,4,250,6,0,1,0,0,0,4,0,,5/12/199,DMONSON,GLBA,H,1330.6234,0.53224936,0,6500130.741,442302.6047,6500796.85,443455.1551,,,
1999,5,252,14,0,1,0,0,0,0,0,,5/13/199,DMONSON,GLBA,H,696.49369,0.278597476,0,6495986.161,428724.2659,6496335.278,429327.4242,,,
1999,1,252,6,0,1,0,0,0,4,0,,5/8/99,DMONSON,GLBA,H,1579.26529,0.631706116,0,6499849.058,427404.9097,6500633.082,428773.3893,,,
1999,2,252,2,0,1,0,0,0,4,0,,5/9/99,DMONSON,GLBA,H,1579.26529,0.631706116,0,6499849.058,427404.9097,6500633.082,428773.3893,,,
1999,3,252,4,0,1,0,0,0,0,0,,5/10/199,DMONSON,GLBA,H,1579.26529,0.631706116,0,6499849.058,427404.9097,6500633.082,428773.3893,,,
1999,4,252,6,0,1,0,0,0,4,0,,5/12/199,DMONSON,GLBA,H,1579.26529,0.631706116,0,6499849.058,427404.9097,6500633.082,428773.3893,,,
1999,1,253,6,0,1,0,0,0,0,0,,5/8/99,DMONSON,GLBA,H,589.17811,0.235671244,0,6499435.16,445894.7616,6499728.789,446404.0274,,,
1999,2,253,2,0,1,0,0,0,0,0,,5/9/99,DMONSON,GLBA,H,589.17811,0.235671244,0,6499435.16,445894.7616,6499728.789,446404.0274,,,
1999,3,253,4,0,1,0,0,0,0,0,,5/10/199,DMONSON,GLBA,H,589.17811,0.235671244,0,6499435.16,445894.7616,6499728.789,446404.0274,,,
1999,4,253,6,0,1,0,0,0,4,0,,5/12/199,DMONSON,GLBA,H,589.17811,0.235671244,0,6499435.16,445894.7616,6499728.789,446404.0274,,,
1999,5,254,14,0,1,0,0,0,0,0,,5/13/199,DMONSON,GLBA,H,2824.0848,1.12963392,0,6495114.938,441612.0543,6496526.766,444058.5963,,,
1999,5,255,14,0,1,0,0,0,4,0,,5/13/199,DMONSON,GLBA,H,2787.326,1.1149304,0,6494855.51,445963.9282,6496250.056,448377.739,,,
1999,1,255,6,0,1,0,0,0,4,0,,5/8/99,DMONSON,GLBA,H,454.56607,0.181826428,0,6497313.176,447019.6159,6497539.834,447413.9007,,,
1999,2,255,2,0,1,0,0,0,0,0,,5/9/99,DMONSON,GLBA,H,454.56607,0.181826428,0,6497313.176,447019.6159,6497539.834,447413.9007,,,
1999,3,255,4,0,1,0,0,0,0,0,,5/10/199,DMONSON,GLBA,H,454.56607,0.181826428,0,6497313.176,447019.6159,6497539.834,447413.9007,,,
1999,4,255,6,0,1,0,0,0,0,0,,5/12/199,DMONSON,GLBA,H,454.56607,0.181826428,0,6497313.176,447019.6159,6497539.834,447413.9007,,,
1999,5,256,14,0,1,0,0,0,0,0,,5/13/199,DMONSON,GLBA,H,400.59935,0.16023974,0,6494815.776,436295.1081,6495016.145,436642.391,,,
1999,1,256,6,0,1,0,0,0,4,0,,5/8/99,DMONSON,GLBA,H,1173.19327,0.469277308,0,6496929.117,441554.9425,6497515.355,442571.8098,,,
1999,2,256,2,0,1,0,0,0,0,0,,5/9/99,DMONSON,GLBA,H,1173.19327,0.469277308,0,6496929.117,441554.9425,6497515.355,442571.8098,,,
1999,3,256,4,0,1,0,0,0,4,0,,5/10/199,DMONSON,GLBA,H,1173.19327,0.469277308,0,6496929.117,441554.9425,6497515.355,442571.8098,,,
1999,4,256,6,0,1,0,0,0,0,0,,5/12/199,DMONSON,GLBA,H,1173.19327,0.469277308,0,6496929.117,441554.9425,6497515.355,442571.8098,,,
1999,5,257,14,0,1,0,0,0,3,0,,5/13/199,DMONSON,GLBA,H,2667.63877,1.067055508,0,6494338.127,430669.5585,6495673.14,432979.953,,,
1999,5,258,14,0,1,0,0,0,0,0,,5/13/199,DMONSON,GLBA,H,642.89426,0.257157704,0,6493796.228,429730.2638,6494118.482,430287.6175,,,
1999,1,258,6,0,1,0,0,0,2,0,,5/8/99,DMONSON,GLBA,H,2649.70186,1.059880744,0,6496024.766,430389.4867,6497348.728,432684.2923,,,
1999,2,258,2,0,1,0,0,0,4,0,,5/9/99,DMONSON,GLBA,H,2649.70186,1.059880744,0,6496024.766,430389.4867,6497348.728,432684.2923,,,
1999,3,258,4,0,1,0,0,0,4,0,,5/10/199,DMONSON,GLBA,H,2649.70186,1.059880744,0,6496024.766,430389.4867,6497348.728,432684.2923,,,
1999,4,258,6,0,1,0,0,0,0,0,,5/12/199,DMONSON,GLBA,H,2649.70186,1.059880744,0,6496024.766,430389.4867,6497348.728,432684.2923,,,
1999,5,259,14,0,1,0,0,0,0,0,,5/13/199,DMONSON,GLBA,H,2580.79278,1.032317112,0,6492857.802,442503.2164,6494148.85,444737.816,,,
1999,1,259,6,0,1,0,0,0,4,0,,5/8/99,DMONSON,GLBA,H,833.92191,0.333568764,0,6495362.492,429234.2133,6495778.202,429957.7916,,,
1999,2,259,2,0,1,0,0,0,0,0,,5/9/99,DMONSON,GLBA,H,833.92191,0.333568764,0,6495362.492,429234.2133,6495778.202,429957.7916,,,
1999,3,259,4,0,1,0,0,0,0,0,,5/10/199,DMONSON,GLBA,H,833.92191,0.333568764,0,6495362.492,429234.2133,6495778.202,429957.7916,,,
1999,4,259,6,0,1,0,0,0,0,0,,5/12/199,DMONSON,GLBA,H,833.92191,0.333568764,0,6495362.492,429234.2133,6495778.202,429957.7916,,,
1999,5,260,14,0,1,0,0,0,0,0,,5/13/199,DMONSON,GLBA,H,648.28642,0.259314568,0,6492566.827,446795.155,6492891.442,447356.0607,,,
1999,5,261,14,0,1,0,0,0,0,0,,5/13/199,DMONSON,GLBA,H,2498.0578,0.99922312,0,6492474.818,432242.3343,6493724.153,434405.4148,,,
1999,1,261,6,0,1,0,0,0,4,0,,5/8/99,DMONSON,GLBA,H,404.94022,0.161976088,0,6494025.021,436527.4308,6494227.219,436877.7076,,,
1999,2,261,2,0,1,0,0,0,4,0,,5/9/99,DMONSON,GLBA,H,404.94022,0.161976088,0,6494025.021,436527.4308,6494227.219,436877.7076,,,
1999,3,261,4,0,1,0,0,0,4,0,,5/10/199,DMONSON,GLBA,H,404.94022,0.161976088,0,6494025.021,436527.4308,6494227.219,436877.7076,,,
1999,4,261,6,0,1,0,0,0,0,0,,5/12/199,DMONSON,GLBA,H,404.94022,0.161976088,0,6494025.021,436527.4308,6494227.219,436877.7076,,,
1999,5,262,14,0,1,0,0,0,0,0,,5/13/199,DMONSON,GLBA,H,1018.27305,0.40730922,0,6492006.766,436229.8608,6492515.888,437110.8731,,,
1999,1,262,6,0,1,0,0,0,0,0,,5/8/99,DMONSON,GLBA,H,4155.24292,1.662097168,0,6492940.295,429847.6969,6495017.376,433446.4444,,,
1999,2,262,2,0,1,0,0,0,4,0,,5/9/99,DMONSON,GLBA,H,4155.24292,1.662097168,0,6492940.295,429847.6969,6495017.376,433446.4444,,,
1999,3,262,4,0,1,0,0,0,0,0,,5/10/199,DMONSON,GLBA,H,4155.24292,1.662097168,0,6492940.295,429847.6969,6495017.376,433446.4444,,,
1999,4,262,6,0,1,0,0,0,2,0,,5/12/199,DMONSON,GLBA,H,4155.24292,1.662097168,0,6492940.295,429847.6969,6495017.376,433446.4444,,,
1999,5,263,14,0,1,0,0,0,0,0,,5/13/199,DMONSON,GLBA,H,1105.39122,0.442156488,0,6491517.377,440181.0055,6492068.925,441137.8575,,,
1999,1,263,6,0,1,0,0,0,4,0,,5/8/99,DMONSON,GLBA,H,2377.09379,0.950837516,0,6491891.14,432829.6434,6493079.423,434889.0509,,,
1999,2,263,2,0,1,0,0,0,4,0,,5/9/99,DMONSON,GLBA,H,2377.09379,0.950837516,0,6491891.14,432829.6434,6493079.423,434889.0509,,,
1999,3,263,4,0,1,0,0,0,0,0,,5/10/199,DMONSON,GLBA,H,2377.09379,0.950837516,0,6491891.14,432829.6434,6493079.423,434889.0509,,,
1999,4,263,6,0,1,0,0,0,2,0,,5/12/199,DMONSON,GLBA,H,2377.09379,0.950837516,0,6491891.14,432829.6434,6493079.423,434889.0509,,,
1999,5,264,14,0,1,0,0,0,0,0,,5/13/199,DMONSON,GLBA,H,420.53093,0.168212372,0,6491506.802,449759.9917,6491715.575,450123.4242,,,
1999,1,264,6,0,1,0,0,0,0,0,,5/8/99,DMONSON,GLBA,H,1278.26681,0.511306724,0,6491798.326,447078.5214,6492434.906,448186.6624,,,
1999,2,264,2,0,1,0,0,0,0,0,,5/9/99,DMONSON,GLBA,H,1278.26681,0.511306724,0,6491798.326,447078.5214,6492434.906,448186.6624,,,
1999,3,264,4,0,1,0,0,0,0,0,,5/10/199,DMONSON,GLBA,H,1278.26681,0.511306724,0,6491798.326,447078.5214,6492434.906,448186.6624,,,
1999,4,264,6,0,1,0,0,0,0,0,,5/12/199,DMONSON,GLBA,H,1278.26681,0.511306724,0,6491798.326,447078.5214,6492434.906,448186.6624,,,
1999,1,265,6,0,1,0,0,0,0,0,,5/8/99,DMONSON,GLBA,H,1798.56581,0.719426324,0,6488341.558,431481.4064,6489240.761,433039.3213,,,
1999,2,265,2,0,1,0,0,0,2,0,,5/9/99,DMONSON,GLBA,H,1798.56581,0.719426324,0,6488341.558,431481.4064,6489240.761,433039.3213,,,
1999,3,265,4,1,1,1,0,1,0,0,25,5/10/199,DMONSON,GLBA,H,1798.56581,0.719426324,0,6488341.558,431481.4064,6489240.761,433039.3213,432103.492,6488613.812,19991025
1999,4,265,6,0,1,0,0,0,0,0,,5/12/199,DMONSON,GLBA,H,1798.56581,0.719426324,0,6488341.558,431481.4064,6489240.761,433039.3213,,,
1999,5,265,14,0,1,0,0,0,0,0,,5/13/199,DMONSON,GLBA,H,425.16991,0.170067964,0,6491496.051,435344.7082,6491708.99,435712.906,,,
1999,1,266,6,0,1,0,0,0,0,0,,5/8/99,DMONSON,GLBA,H,1186.50099,0.474600396,0,6486444.138,428195.4802,6487037.939,429223.1231,,,
1999,2,266,2,0,1,0,0,0,4,0,,5/9/99,DMONSON,GLBA,H,1186.50099,0.474600396,0,6486444.138,428195.4802,6487037.939,429223.1231,,,
1999,3,266,4,0,1,0,0,0,0,0,,5/10/199,DMONSON,GLBA,H,1186.50099,0.474600396,0,6486444.138,428195.4802,6487037.939,429223.1231,,,
1999,4,266,6,0,1,0,0,0,0,0,,5/12/199,DMONSON,GLBA,H,1186.50099,0.474600396,0,6486444.138,428195.4802,6487037.939,429223.1231,,,
1999,5,266,14,0,1,0,0,0,0,0,,5/13/199,DMONSON,GLBA,H,2465.62714,0.986250856,0,6491131.542,444310.0364,6492365.612,446444.3215,,,
1999,1,267,6,0,1,0,0,0,4,0,,5/8/99,DMONSON,GLBA,H,547.66822,0.219067288,0,6485450.064,436072.3387,6485724.461,436546.9546,,,
1999,2,267,2,0,1,0,0,0,4,0,,5/9/99,DMONSON,GLBA,H,547.66822,0.219067288,0,6485450.064,436072.3387,6485724.461,436546.9546,,,
1999,4,267,6,0,1,0,0,0,0,0,,5/12/199,DMONSON,GLBA,H,547.66822,0.219067288,0,6485450.064,436072.3387,6485724.461,436546.9546,,,
1999,5,267,14,0,1,0,0,0,0,0,,5/13/199,DMONSON,GLBA,H,1099.88969,0.439955876,0,6490476.126,447964.7236,6491027.757,448917.7544,,,
1999,1,268,6,0,1,0,0,0,4,0,,5/8/99,DMONSON,GLBA,H,914.25569,0.365702276,0,6485121.581,440302.6578,6485579.14,441095.4568,,,
1999,2,268,2,1,1,1,0,1,1,0,,5/9/99,DMONSON,GLBA,H,914.25569,0.365702276,0,6485121.581,440302.6578,6485579.14,441095.4568,440309.9924,6485239.186,
1999,3,268,4,1,1,1,0,1,0,0,20,5/10/199,DMONSON,GLBA,H,914.25569,0.365702276,0,6485121.581,440302.6578,6485579.14,441095.4568,440310.9187,6485234.283,19991020
1999,4,268,6,0,1,0,0,0,0,0,,5/12/199,DMONSON,GLBA,H,914.25569,0.365702276,0,6485121.581,440302.6578,6485579.14,441095.4568,,,
1999,5,268,14,0,1,0,0,0,0,0,,5/13/199,DMONSON,GLBA,H,461.66532,0.184666128,0,6490426.471,433493.3163,6490657.268,433893.0679,,,
1999,1,269,6,0,1,0,0,0,0,0,,5/8/99,DMONSON,GLBA,H,834.53334,0.333813336,0,6484049.967,448034.6564,6484467.309,448757.2058,,,
1999,2,269,2,0,1,0,0,0,0,0,,5/9/99,DMONSON,GLBA,H,834.53334,0.333813336,0,6484049.967,448034.6564,6484467.309,448757.2058,,,
1999,3,269,4,0,1,0,0,0,0,0,,5/10/199,DMONSON,GLBA,H,834.53334,0.333813336,0,6484049.967,448034.6564,6484467.309,448757.2058,,,
1999,4,269,6,0,1,0,0,0,0,0,,5/12/199,DMONSON,GLBA,H,834.53334,0.333813336,0,6484049.967,448034.6564,6484467.309,448757.2058,,,
1999,5,269,14,0,1,0,0,0,0,0,,5/13/199,DMONSON,GLBA,H,2499.63264,0.999853056,0,6489619.964,441692.8654,6490868.907,443857.1788,,,
1999,1,270,6,0,1,0,0,0,0,0,,5/8/99,DMONSON,GLBA,H,574.54969,0.229819876,0,6483493.074,447072.9515,6483781.476,447570.4914,,,
1999,2,270,2,0,1,0,0,0,4,0,,5/9/99,DMONSON,GLBA,H,574.54969,0.229819876,0,6483493.074,447072.9515,6483781.476,447570.4914,,,
1999,3,270,4,0,1,0,0,0,0,0,,5/10/199,DMONSON,GLBA,H,574.54969,0.229819876,0,6483493.074,447072.9515,6483781.476,447570.4914,,,
1999,4,270,6,0,1,0,0,0,0,0,,5/12/199,DMONSON,GLBA,H,574.54969,0.229819876,0,6483493.074,447072.9515,6483781.476,447570.4914,,,
1999,5,270,14,0,1,0,0,0,0,0,,5/13/199,DMONSON,GLBA,H,400.2687,0.16010748,0,6486291.375,435926.7963,6486489.874,436273.839,,,
1999,1,271,6,0,1,0,0,0,0,0,,5/8/99,DMONSON,GLBA,H,568.0372,0.22721488,0,6482644.581,445606.3603,6482931.023,446098.2611,,,
1999,2,271,2,0,1,0,0,0,4,0,,5/9/99,DMONSON,GLBA,H,568.0372,0.22721488,0,6482644.581,445606.3603,6482931.023,446098.2611,,,
1999,3,271,4,0,1,0,0,0,0,0,,5/10/199,DMONSON,GLBA,H,568.0372,0.22721488,0,6482644.581,445606.3603,6482931.023,446098.2611,,,
1999,4,271,6,0,1,0,0,0,0,0,,5/12/199,DMONSON,GLBA,H,568.0372,0.22721488,0,6482644.581,445606.3603,6482931.023,446098.2611,,,
1999,5,271,14,0,1,0,0,0,0,0,,5/13/199,DMONSON,GLBA,H,740.1014,0.29604056,0,6486106.611,450008.129,6486477.072,450649.869,,,
1999,1,272,6,0,1,0,0,0,0,0,,5/8/99,DMONSON,GLBA,H,946.33788,0.378535152,0,6481736.206,448838.1453,6482209.994,449657.0172,,,
1999,2,272,2,0,1,0,0,0,0,0,,5/9/99,DMONSON,GLBA,H,946.33788,0.378535152,0,6481736.206,448838.1453,6482209.994,449657.0172,,,
1999,3,272,4,0,1,0,0,0,0,0,,5/10/199,DMONSON,GLBA,H,946.33788,0.378535152,0,6481736.206,448838.1453,6482209.994,449657.0172,,,
1999,5,272,14,0,1,0,0,0,0,0,,5/13/199,DMONSON,GLBA,H,480.64539,0.192258156,0,6485686.071,439679.8998,6485926.523,440096.395,,,
1999,1,273,6,0,1,0,0,0,4,0,,5/8/99,DMONSON,GLBA,H,1351.44499,0.540577996,0,6480657.244,437371.3108,6481334.736,438541.2638,,,
1999,2,273,2,0,1,0,0,0,4,0,,5/9/99,DMONSON,GLBA,H,1351.44499,0.540577996,0,6480657.244,437371.3108,6481334.736,438541.2638,,,
1999,3,273,4,0,1,0,0,0,0,0,,5/10/199,DMONSON,GLBA,H,1351.44499,0.540577996,0,6480657.244,437371.3108,6481334.736,438541.2638,,,
1999,4,273,6,0,1,0,0,0,0,0,,5/12/199,DMONSON,GLBA,H,1351.44499,0.540577996,0,6480657.244,437371.3108,6481334.736,438541.2638,,,
1999,5,273,14,0,1,0,0,0,0,0,,5/13/199,DMONSON,GLBA,H,830.5974,0.33223896,0,6485013.95,448117.3885,6485427.634,448836.7924,,,
1999,1,274,6,0,1,0,0,0,4,0,,5/8/99,DMONSON,GLBA,H,484.09414,0.193637656,0,6480558.243,441998.3537,6480800.756,442418.1801,,,
1999,2,274,2,0,1,0,0,0,4,0,,5/9/99,DMONSON,GLBA,H,484.09414,0.193637656,0,6480558.243,441998.3537,6480800.756,442418.1801,,,
1999,3,274,4,0,1,0,0,0,0,0,,5/10/199,DMONSON,GLBA,H,484.09414,0.193637656,0,6480558.243,441998.3537,6480800.756,442418.1801,,,
1999,4,274,6,0,1,0,0,0,0,0,,5/12/199,DMONSON,GLBA,H,484.09414,0.193637656,0,6480558.243,441998.3537,6480800.756,442418.1801,,,
1999,5,274,14,0,1,0,0,0,0,0,,5/13/199,DMONSON,GLBA,H,1694.05026,0.677620104,0,6483911.305,446207.9459,6484758.14,447675.8559,,,
1999,1,275,6,0,1,0,0,0,0,0,,5/8/99,DMONSON,GLBA,H,2067.35367,0.826941468,0,6479953.317,445751.8796,6480986.843,447541.8458,,,
1999,2,275,2,0,1,0,0,0,0,0,,5/9/99,DMONSON,GLBA,H,2067.35367,0.826941468,0,6479953.317,445751.8796,6480986.843,447541.8458,,,
1999,3,275,4,0,1,0,0,0,0,0,,5/10/199,DMONSON,GLBA,H,2067.35367,0.826941468,0,6479953.317,445751.8796,6480986.843,447541.8458,,,
1999,5,275,14,0,1,0,0,0,0,0,,5/13/199,DMONSON,GLBA,H,903.53255,0.36141302,0,6483421.001,435757.3508,6483872.248,436540.259,,,
1999,1,276,6,0,1,0,0,0,0,0,,5/8/99,DMONSON,GLBA,H,665.91858,0.266367432,0,6477992.823,437553.5899,6478325.183,438131.1038,,,
1999,2,276,2,0,1,0,0,0,1,0,,5/9/99,DMONSON,GLBA,H,665.91858,0.266367432,0,6477992.823,437553.5899,6478325.183,438131.1038,,,
1999,3,276,4,0,1,0,0,0,4,0,,5/10/199,DMONSON,GLBA,H,665.91858,0.266367432,0,6477992.823,437553.5899,6478325.183,438131.1038,,,
1999,4,276,6,0,1,0,0,0,0,0,,5/12/199,DMONSON,GLBA,H,665.91858,0.266367432,0,6477992.823,437553.5899,6478325.183,438131.1038,,,
1999,5,276,14,0,1,0,0,0,1,0,,5/13/199,DMONSON,GLBA,H,8887.73854,3.555095416,0,6483126.57,440047.7212,6487570.811,447744.5075,,,
1999,1,277,6,0,1,0,0,0,0,0,,5/8/99,DMONSON,GLBA,H,1956.20555,0.78248222,0,6477278.514,445916.3801,6478255.88,447610.4118,,,
1999,2,277,2,0,1,0,0,0,3,0,,5/9/99,DMONSON,GLBA,H,1956.20555,0.78248222,0,6477278.514,445916.3801,6478255.88,447610.4118,,,
1999,3,277,4,0,1,0,0,0,0,0,,5/10/199,DMONSON,GLBA,H,1956.20555,0.78248222,0,6477278.514,445916.3801,6478255.88,447610.4118,,,
1999,4,277,6,0,1,0,0,0,0,0,,5/12/199,DMONSON,GLBA,H,1956.20555,0.78248222,0,6477278.514,445916.3801,6478255.88,447610.4118,,,
1999,5,277,14,0,1,0,0,0,0,0,,5/13/199,DMONSON,GLBA,H,596.65433,0.238661732,0,6481489.454,437210.5422,6481787.447,437727.7277,,,
1999,1,278,6,0,1,0,0,0,0,0,,5/8/99,DMONSON,GLBA,H,419.78401,0.167913604,0,6475622.837,438250.1697,6475832.448,438612.7917,,,
1999,2,278,2,0,1,0,0,0,4,0,,5/9/99,DMONSON,GLBA,H,419.78401,0.167913604,0,6475622.837,438250.1697,6475832.448,438612.7917,,,
1999,3,278,4,0,1,0,0,0,4,0,,5/10/199,DMONSON,GLBA,H,419.78401,0.167913604,0,6475622.837,438250.1697,6475832.448,438612.7917,,,
1999,4,278,6,0,1,0,0,0,0,0,,5/12/199,DMONSON,GLBA,H,419.78401,0.167913604,0,6475622.837,438250.1697,6475832.448,438612.7917,,,
1999,5,278,14,0,1,0,0,0,0,0,,5/13/199,DMONSON,GLBA,H,1133.8607,0.45354428,0,6480833.024,440873.3213,6481399.247,441856.1843,,,
1999,1,279,6,0,1,0,0,0,4,0,,5/8/99,DMONSON,GLBA,H,1440.3299,0.57613196,0,6474705.227,446258.851,6475423.288,447507.3638,,,
1999,2,279,2,0,1,0,0,0,3,0,,5/9/99,DMONSON,GLBA,H,1440.3299,0.57613196,0,6474705.227,446258.851,6475423.288,447507.3638,,,
1999,3,279,4,0,1,0,0,0,3,0,,5/10/199,DMONSON,GLBA,H,1440.3299,0.57613196,0,6474705.227,446258.851,6475423.288,447507.3638,,,
1999,4,279,6,0,1,0,0,0,0,0,,5/12/199,DMONSON,GLBA,H,1440.3299,0.57613196,0,6474705.227,446258.851,6475423.288,447507.3638,,,
1999,5,279,14,0,1,0,0,0,0,0,,5/13/199,DMONSON,GLBA,H,800.37888,0.320151552,0,6479504.362,443374.901,6479904.577,444068.3985,,,
1999,1,280,6,0,1,0,0,0,4,0,,5/8/99,DMONSON,GLBA,H,935.74999,0.374299996,0,6472875.34,438290.8004,6473343.391,439102.0259,,,
1999,2,280,2,0,1,0,0,0,4,0,,5/9/99,DMONSON,GLBA,H,935.74999,0.374299996,0,6472875.34,438290.8004,6473343.391,439102.0259,,,
1999,3,280,4,0,1,0,0,0,4,0,,5/10/199,DMONSON,GLBA,H,935.74999,0.374299996,0,6472875.34,438290.8004,6473343.391,439102.0259,,,
1999,4,280,6,0,1,0,0,0,0,0,,5/12/199,DMONSON,GLBA,H,935.74999,0.374299996,0,6472875.34,438290.8004,6473343.391,439102.0259,,,
1999,5,280,14,0,1,0,0,0,0,0,,5/13/199,DMONSON,GLBA,H,1331.42459,0.532569836,0,6478603.427,446609.9158,6479267.172,447763.0296,,,
1999,1,281,6,0,1,0,0,0,4,0,,5/8/99,DMONSON,GLBA,H,439.92882,0.175971528,0,6471644.288,445757.888,6471869.234,446135.2755,,,
1999,2,281,2,0,1,0,0,0,4,0,,5/9/99,DMONSON,GLBA,H,439.92882,0.175971528,0,6471644.288,445757.888,6471869.234,446135.2755,,,
1999,3,281,4,0,1,0,0,0,0,0,,5/10/199,DMONSON,GLBA,H,439.92882,0.175971528,0,6471644.288,445757.888,6471869.234,446135.2755,,,
1999,4,281,6,0,1,0,0,0,0,0,,5/12/199,DMONSON,GLBA,H,439.92882,0.175971528,0,6471644.288,445757.888,6471869.234,446135.2755,,,
1999,5,281,14,0,1,0,0,0,0,0,,5/13/199,DMONSON,GLBA,H,1148.86754,0.459547016,0,6478601.023,437008.592,6479175.375,438004.3994,,,
1999,1,282,6,0,1,0,0,0,4,0,,5/8/99,DMONSON,GLBA,H,1597.67241,0.639068964,0,6468078.037,439582.497,6468877.382,440966.2997,,,
1999,2,282,2,0,1,0,0,0,4,0,,5/9/99,DMONSON,GLBA,H,1597.67241,0.639068964,0,6468078.037,439582.497,6468877.382,440966.2997,,,
1999,3,282,4,0,1,0,0,0,4,0,,5/10/199,DMONSON,GLBA,H,1597.67241,0.639068964,0,6468078.037,439582.497,6468877.382,440966.2997,,,
1999,4,282,6,0,1,0,0,0,0,0,,5/12/199,DMONSON,GLBA,H,1597.67241,0.639068964,0,6468078.037,439582.497,6468877.382,440966.2997,,,
1999,5,282,14,0,1,0,0,0,0,0,,5/13/199,DMONSON,GLBA,H,677.14523,0.270858092,0,6476382.701,437966.1233,6476720.551,438552.6796,,,
1999,1,283,6,0,1,0,0,0,0,0,,5/8/99,DMONSON,GLBA,H,473.49427,0.189397708,0,6467248.76,433346.2664,6467486.823,433757.2438,,,
1999,2,283,2,0,1,0,0,0,0,0,,5/9/99,DMONSON,GLBA,H,473.49427,0.189397708,0,6467248.76,433346.2664,6467486.823,433757.2438,,,
1999,4,283,6,0,1,0,0,0,0,0,,5/12/199,DMONSON,GLBA,H,473.49427,0.189397708,0,6467248.76,433346.2664,6467486.823,433757.2438,,,
1999,5,283,14,0,1,0,0,0,0,0,,5/13/199,DMONSON,GLBA,H,1401.08251,0.560433004,0,6475547.891,446117.4896,6476247.808,447331.4478,,,
1999,1,284,6,0,1,0,0,0,0,0,,5/8/99,DMONSON,GLBA,H,2911.8956,1.16475824,0,6466164.175,445866.837,6467620.626,448387.6762,,,
1999,2,284,2,0,1,0,0,0,4,0,,5/9/99,DMONSON,GLBA,H,2911.8956,1.16475824,0,6466164.175,445866.837,6467620.626,448387.6762,,,
1999,3,284,4,0,1,0,0,0,2,0,,5/10/199,DMONSON,GLBA,H,2911.8956,1.16475824,0,6466164.175,445866.837,6467620.626,448387.6762,,,
1999,4,284,6,0,1,0,0,0,0,0,,5/12/199,DMONSON,GLBA,H,2911.8956,1.16475824,0,6466164.175,445866.837,6467620.626,448387.6762,,,
1999,5,284,14,1,1,7,3,10,0,0,51,5/13/199,DMONSON,GLBA,H,1105.21673,0.442086692,0,6473682.167,438088.1363,6474235.133,439045.6975,438964.7211,6474050.54,19991051
1999,5,284,14,2,1,1,0,1,0,0,51,5/13/199,DMONSON,GLBA,H,1105.21673,0.442086692,0,6473682.167,438088.1363,6474235.133,439045.6975,438836.5992,6473977.328,19992051
1999,5,285,14,0,1,0,0,0,4,0,,5/13/199,DMONSON,GLBA,H,956.96847,0.382787388,0,6472688.153,445966.2063,6473166.822,446794.1841,,,
1999,5,286,14,0,1,0,0,0,1,0,,5/13/199,DMONSON,GLBA,H,558.1025,0.223241,0,6471541.901,439179.4091,6471820.269,439663.2999,,,
1999,5,287,14,0,1,0,0,0,0,0,,5/13/199,DMONSON,GLBA,H,674.7269,0.26989076,0,6471068.42,438357.995,6471410.132,438939.5021,,,
1999,5,288,14,0,1,0,0,0,4,0,,5/13/199,DMONSON,GLBA,H,499.05834,0.199623336,0,6469886.545,450712.9052,6470135.41,451145.0623,,,
1999,5,289,14,0,1,0,0,0,4,0,,5/13/199,DMONSON,GLBA,H,4671.62113,1.868648452,0,6469748.694,445675.1913,6472081.57,449722.8901,,,
1999,5,290,14,0,1,0,0,0,4,0,,5/13/199,DMONSON,GLBA,H,720.91028,0.288364112,0,6468680.566,439022.9931,6469040.289,439647.005,,,
1999,5,293,14,0,1,0,0,0,4,0,,5/13/199,DMONSON,GLBA,H,1484.31103,0.593724412,0,6466764.847,440504.2133,6467504.723,441789.8103,,,
1999,1,301,6,0,1,0,0,0,1,0,,5/8/99,DMONSON,GLBA,H,4910.87438,1.964349752,0,6508743.696,438023.225,6511200.52,442275.6065,,,
1999,2,301,2,0,1,0,0,0,0,0,,5/9/99,DMONSON,GLBA,H,4910.87438,1.964349752,0,6508743.696,438023.225,6511200.52,442275.6065,,,
1999,3,301,4,0,1,0,0,0,1,0,,5/10/199,DMONSON,GLBA,H,4910.87438,1.964349752,0,6508743.696,438023.225,6511200.52,442275.6065,,,
1999,4,301,6,0,1,0,0,0,2,0,,5/12/199,DMONSON,GLBA,H,4910.87438,1.964349752,0,6508743.696,438023.225,6511200.52,442275.6065,,,
1999,1,302,6,0,1,0,0,0,2,0,,5/8/99,DMONSON,GLBA,H,4033.88951,1.613555804,0,6502277.62,441222.1342,6504294.021,444715.2571,,,
1999,2,302,2,0,1,0,0,0,2,0,,5/9/99,DMONSON,GLBA,H,4033.88951,1.613555804,0,6502277.62,441222.1342,6504294.021,444715.2571,,,
1999,3,302,4,0,1,0,0,0,0,0,,5/10/199,DMONSON,GLBA,H,4033.88951,1.613555804,0,6502277.62,441222.1342,6504294.021,444715.2571,,,
1999,4,302,6,0,1,0,0,0,4,0,,5/12/199,DMONSON,GLBA,H,4033.88951,1.613555804,0,6502277.62,441222.1342,6504294.021,444715.2571,,,
1999,1,303,6,0,1,0,0,0,4,0,,5/8/99,DMONSON,GLBA,H,1800.65297,0.720261188,0,6500829.642,438711.6706,6501729.724,440270.7014,,,
1999,2,303,2,1,1,1,0,1,4,0,11,5/9/99,DMONSON,GLBA,H,1800.65297,0.720261188,0,6500829.642,438711.6706,6501729.724,440270.7014,440084.8667,6501648.466,19991011
1999,3,303,4,0,1,0,0,0,0,0,,5/10/199,DMONSON,GLBA,H,1800.65297,0.720261188,0,6500829.642,438711.6706,6501729.724,440270.7014,,,
1999,4,303,6,0,1,0,0,0,4,0,,5/12/199,DMONSON,GLBA,H,1800.65297,0.720261188,0,6500829.642,438711.6706,6501729.724,440270.7014,,,
1999,1,304,6,0,1,0,0,0,2,0,,5/8/99,DMONSON,GLBA,H,2772.3675,1.108947,0,6498216.321,429387.6568,6499602.77,431789.14,,,
1999,2,304,2,0,1,0,0,0,4,0,,5/9/99,DMONSON,GLBA,H,2772.3675,1.108947,0,6498216.321,429387.6568,6499602.77,431789.14,,,
1999,3,304,4,0,1,0,0,0,4,0,,5/10/199,DMONSON,GLBA,H,2772.3675,1.108947,0,6498216.321,429387.6568,6499602.77,431789.14,,,
1999,4,304,6,0,1,0,0,0,4,0,,5/12/199,DMONSON,GLBA,H,2772.3675,1.108947,0,6498216.321,429387.6568,6499602.77,431789.14,,,
1999,1,305,6,0,1,0,0,0,4,0,,5/8/99,DMONSON,GLBA,H,3232.46985,1.29298794,0,6494402.335,441978.3917,6496019.124,444776.8919,,,
1999,2,305,2,0,1,0,0,0,4,0,,5/9/99,DMONSON,GLBA,H,3232.46985,1.29298794,0,6494402.335,441978.3917,6496019.124,444776.8919,,,
1999,3,305,4,0,1,0,0,0,3,0,,5/10/199,DMONSON,GLBA,H,3232.46985,1.29298794,0,6494402.335,441978.3917,6496019.124,444776.8919,,,
1999,4,305,6,0,1,0,0,0,0,0,,5/12/199,DMONSON,GLBA,H,3232.46985,1.29298794,0,6494402.335,441978.3917,6496019.124,444776.8919,,,
1999,5,305,14,0,1,0,0,0,0,0,,5/13/199,DMONSON,GLBA,H,1385.71525,0.5542861,0,6509761.975,438184.2835,6510453.925,439384.4199,,,
1999,1,306,6,0,1,0,0,0,3,0,,5/8/99,DMONSON,GLBA,H,4870.00471,1.948001884,0,6494067.226,446196.2815,6496502.026,450414.0988,,,
1999,2,306,2,0,1,0,0,0,4,0,,5/9/99,DMONSON,GLBA,H,4870.00471,1.948001884,0,6494067.226,446196.2815,6496502.026,450414.0988,,,
1999,3,306,4,0,1,0,0,0,2,0,,5/10/199,DMONSON,GLBA,H,4870.00471,1.948001884,0,6494067.226,446196.2815,6496502.026,450414.0988,,,
1999,4,306,6,0,1,0,0,0,0,0,,5/12/199,DMONSON,GLBA,H,4870.00471,1.948001884,0,6494067.226,446196.2815,6496502.026,450414.0988,,,
1999,1,307,6,0,1,0,0,0,3,0,,5/8/99,DMONSON,GLBA,H,6556.88033,2.622752132,0,6490547.875,440103.1033,6493826.143,445780.0538,,,
1999,2,307,2,0,1,0,0,0,4,0,,5/9/99,DMONSON,GLBA,H,6556.88033,2.622752132,0,6490547.875,440103.1033,6493826.143,445780.0538,,,
1999,3,307,4,2,1,1,0,1,0,0,,5/10/199,DMONSON,GLBA,H,6556.88033,2.622752132,0,6490547.875,440103.1033,6493826.143,445780.0538,442081.1483,6491671.481,
1999,3,307,4,1,1,1,0,1,0,0,27,5/10/199,DMONSON,GLBA,H,6556.88033,2.622752132,0,6490547.875,440103.1033,6493826.143,445780.0538,440290.8029,6490625.437,19991027
1999,4,307,6,1,1,1,0,1,0,0,,5/12/199,DMONSON,GLBA,H,6556.88033,2.622752132,0,6490547.875,440103.1033,6493826.143,445780.0538,444146.918,6492880.703,
1999,4,307,6,2,1,1,0,1,0,0,,5/12/199,DMONSON,GLBA,H,6556.88033,2.622752132,0,6490547.875,440103.1033,6493826.143,445780.0538,443927.2814,6492770.885,
1999,4,307,6,3,1,2,0,2,0,0,41,5/12/199,DMONSON,GLBA,H,6556.88033,2.622752132,0,6490547.875,440103.1033,6493826.143,445780.0538,440808.4445,6490991.829,19993041
1999,4,307,6,4,1,1,0,1,0,0,41,5/12/199,DMONSON,GLBA,H,6556.88033,2.622752132,0,6490547.875,440103.1033,6493826.143,445780.0538,440698.6266,6490838.084,19994041
1999,5,307,14,0,1,0,0,0,0,0,,5/13/199,DMONSON,GLBA,H,1067.68121,0.427072484,0,6506226.263,441658.6037,6506763.774,442580.5832,,,
1999,1,308,6,1,1,1,0,1,4,0,5,5/8/99,DMONSON,GLBA,H,6708.16777,2.683267108,0,6488138.548,440727.2409,6491486.435,446539.9181,441233.9917,6488452.59,19991005
1999,1,308,6,2,1,1,0,1,4,0,,5/8/99,DMONSON,GLBA,H,6708.16777,2.683267108,0,6488138.548,440727.2409,6491486.435,446539.9181,440764.5198,6488254.917,
1999,2,308,2,1,1,1,0,1,3,0,13,5/9/99,DMONSON,GLBA,H,6708.16777,2.683267108,0,6488138.548,440727.2409,6491486.435,446539.9181,441210.5034,6488491.025,19991013
1999,2,308,2,2,1,2,0,2,3,0,13,5/9/99,DMONSON,GLBA,H,6708.16777,2.683267108,0,6488138.548,440727.2409,6491486.435,446539.9181,441460.6451,6488466.011,19992013
1999,3,308,4,1,1,1,0,1,0,0,21,5/10/199,DMONSON,GLBA,H,6708.16777,2.683267108,0,6488138.548,440727.2409,6491486.435,446539.9181,440934.5223,6488251.72,19991021
1999,3,308,4,1,1,1,0,1,0,0,22,5/10/199,DMONSON,GLBA,H,6708.16777,2.683267108,0,6488138.548,440727.2409,6491486.435,446539.9181,443247.8901,6489599.508,19991022
1999,3,308,4,2,1,1,0,1,0,0,,5/10/199,DMONSON,GLBA,H,6708.16777,2.683267108,0,6488138.548,440727.2409,6491486.435,446539.9181,441879.9857,6488794.859,
1999,3,308,4,3,1,1,0,1,0,0,,5/10/199,DMONSON,GLBA,H,6708.16777,2.683267108,0,6488138.548,440727.2409,6491486.435,446539.9181,442262.1943,6488996.021,
1999,3,308,4,5,1,2,0,2,0,0,,5/10/199,DMONSON,GLBA,H,6708.16777,2.683267108,0,6488138.548,440727.2409,6491486.435,446539.9181,443609.9829,6489800.671,
1999,4,308,6,1,1,1,0,1,0,0,38,5/12/199,DMONSON,GLBA,H,6708.16777,2.683267108,0,6488138.548,440727.2409,6491486.435,446539.9181,441533.2451,6488685.648,19991038
1999,4,308,6,2,1,1,0,1,0,0,38,5/12/199,DMONSON,GLBA,H,6708.16777,2.683267108,0,6488138.548,440727.2409,6491486.435,446539.9181,441708.9537,6488641.72,19992038
1999,4,308,6,3,1,2,0,2,0,0,,5/12/199,DMONSON,GLBA,H,6708.16777,2.683267108,0,6488138.548,440727.2409,6491486.435,446539.9181,442301.9716,6489080.993,
1999,4,308,6,4,1,1,0,1,0,0,,5/12/199,DMONSON,GLBA,H,6708.16777,2.683267108,0,6488138.548,440727.2409,6491486.435,446539.9181,442916.9543,6489410.448,
1999,1,309,6,0,1,0,0,0,0,0,,5/8/99,DMONSON,GLBA,H,1221.35242,0.488540968,0,6486954.657,433878.0288,6487566.127,434935.9811,,,
1999,2,309,2,0,1,0,0,0,1,0,,5/9/99,DMONSON,GLBA,H,1221.35242,0.488540968,0,6486954.657,433878.0288,6487566.127,434935.9811,,,
1999,3,309,4,0,1,0,0,0,2,0,,5/10/199,DMONSON,GLBA,H,1221.35242,0.488540968,0,6486954.657,433878.0288,6487566.127,434935.9811,,,
1999,4,309,6,1,1,1,0,1,0,0,39,5/12/199,DMONSON,GLBA,H,1221.35242,0.488540968,0,6486954.657,433878.0288,6487566.127,434935.9811,434771.4933,6487456.903,19991039
1999,5,309,14,0,1,0,0,0,0,0,,5/13/199,DMONSON,GLBA,H,887.16798,0.354867192,0,6496798.326,434929.7658,6497242.17,435698.4188,,,
1999,5,310,14,0,1,0,0,0,0,0,,5/13/199,DMONSON,GLBA,H,2279.43303,0.911773212,0,6488970.503,430969.2713,6490109.193,432943.5802,,,
1999,1,310,6,1,1,1,0,1,0,0,6,5/8/99,DMONSON,GLBA,H,9490.79154,3.796316616,0,6486000.669,441825.372,6490745.942,450044.1155,442667.12,6486574.699,19991006
1999,2,310,2,0,1,0,0,0,2,0,,5/9/99,DMONSON,GLBA,H,9490.79154,3.796316616,0,6486000.669,441825.372,6490745.942,450044.1155,,,
1999,3,310,4,0,1,0,0,0,0,0,,5/10/199,DMONSON,GLBA,H,9490.79154,3.796316616,0,6486000.669,441825.372,6490745.942,450044.1155,,,
1999,4,310,6,0,1,0,0,0,0,0,,5/12/199,DMONSON,GLBA,H,9490.79154,3.796316616,0,6486000.669,441825.372,6490745.942,450044.1155,,,
1999,1,311,6,0,1,0,0,0,2,0,,5/8/99,DMONSON,GLBA,H,11241.0369,4.49641476,0,6482587.489,440713.1351,6488207.482,450447.4778,,,
1999,2,311,2,0,1,0,0,0,3,0,,5/9/99,DMONSON,GLBA,H,11241.0369,4.49641476,0,6482587.489,440713.1351,6488207.482,450447.4778,,,
1999,3,311,4,0,1,0,0,0,1,0,,5/10/199,DMONSON,GLBA,H,11241.0369,4.49641476,0,6482587.489,440713.1351,6488207.482,450447.4778,,,
1999,4,311,6,0,1,0,0,0,0,0,,5/12/199,DMONSON,GLBA,H,11241.0369,4.49641476,0,6482587.489,440713.1351,6488207.482,450447.4778,,,
1999,5,311,14,0,1,0,0,0,4,0,,5/13/199,DMONSON,GLBA,H,2455.90893,0.982363572,0,6488033.466,448544.7029,6489266.268,450668.5479,,,
1999,1,312,6,0,1,0,0,0,4,0,,5/8/99,DMONSON,GLBA,H,1822.30735,0.72892294,0,6482460.629,435692.996,6483370.492,437270.8002,,,
1999,2,312,2,0,1,0,0,0,1,0,,5/9/99,DMONSON,GLBA,H,1822.30735,0.72892294,0,6482460.629,435692.996,6483370.492,437270.8002,,,
1999,3,312,4,0,1,0,0,0,2,0,,5/10/199,DMONSON,GLBA,H,1822.30735,0.72892294,0,6482460.629,435692.996,6483370.492,437270.8002,,,
1999,4,312,6,0,1,0,0,0,0,0,,5/12/199,DMONSON,GLBA,H,1822.30735,0.72892294,0,6482460.629,435692.996,6483370.492,437270.8002,,,
1999,5,312,14,0,1,0,0,0,0,0,,5/13/199,DMONSON,GLBA,H,642.00973,0.256803892,0,6487452.864,428351.8703,6487663.575,428705.2723,,,
1999,1,313,6,1,1,3,0,3,0,0,9,5/8/99,DMONSON,GLBA,H,3868.44144,1.547376576,0,6469100.049,436553.771,6471035.228,439903.7747,439698.3688,6470791.38,19991009
1999,2,313,2,0,1,0,0,0,1,0,,5/9/99,DMONSON,GLBA,H,3868.44144,1.547376576,0,6469100.049,436553.771,6471035.228,439903.7747,,,
1999,3,313,4,1,1,4,0,4,0,0,18,5/10/199,DMONSON,GLBA,H,3868.44144,1.547376576,0,6469100.049,436553.771,6471035.228,439903.7747,439771.8867,6470918.281,19991018
1999,4,313,6,1,1,1,0,1,0,0,34,5/12/199,DMONSON,GLBA,H,3868.44144,1.547376576,0,6469100.049,436553.771,6471035.228,439903.7747,439770.9675,6470956.107,19991034
1999,4,313,6,2,1,4,2,6,0,0,,5/12/199,DMONSON,GLBA,H,3868.44144,1.547376576,0,6469100.049,436553.771,6471035.228,439903.7747,439657.489,6470766.976,
1999,5,313,14,1,1,1,0,1,0,0,,5/13/199,DMONSON,GLBA,H,5607.68261,2.243073044,0,6487156.608,442224.1346,6489962.788,447078.8826,442938.6171,6487647.559,
1999,1,314,6,0,1,0,0,0,1,0,,5/8/99,DMONSON,GLBA,H,6115.89925,2.4463597,0,6468940.525,445871.8061,6471998.406,451168.1872,,,
1999,2,314,2,0,1,0,0,0,2,0,,5/9/99,DMONSON,GLBA,H,6115.89925,2.4463597,0,6468940.525,445871.8061,6471998.406,451168.1872,,,
1999,3,314,4,1,1,1,0,1,1,0,16,5/10/199,DMONSON,GLBA,H,6115.89925,2.4463597,0,6468940.525,445871.8061,6471998.406,451168.1872,447032.0917,6469673.674,19991016
1999,3,314,4,2,1,1,0,1,1,0,16,5/10/199,DMONSON,GLBA,H,6115.89925,2.4463597,0,6468940.525,445871.8061,6471998.406,451168.1872,446969.8611,6469569.957,19992016
1999,3,314,4,3,1,2,0,2,1,0,16,5/10/199,DMONSON,GLBA,H,6115.89925,2.4463597,0,6468940.525,445871.8061,6471998.406,451168.1872,447115.0652,6469549.213,19993016
1999,4,314,6,0,1,0,0,0,3,0,,5/12/199,DMONSON,GLBA,H,6115.89925,2.4463597,0,6468940.525,445871.8061,6471998.406,451168.1872,,,
1999,5,314,14,0,1,0,0,0,3,0,,5/13/199,DMONSON,GLBA,H,4240.09958,1.696039832,0,6486118.49,430817.9143,6488232.425,434492.7523,,,
1999,1,315,6,0,1,0,0,0,0,0,,5/8/99,DMONSON,GLBA,H,980.25976,0.392103904,0,6466233.133,441183.3898,6466723.504,442033.0075,,,
1999,2,315,2,0,1,0,0,0,4,0,,5/9/99,DMONSON,GLBA,H,980.25976,0.392103904,0,6466233.133,441183.3898,6466723.504,442033.0075,,,
1999,3,315,4,0,1,0,0,0,4,0,,5/10/199,DMONSON,GLBA,H,980.25976,0.392103904,0,6466233.133,441183.3898,6466723.504,442033.0075,,,
1999,4,315,6,0,1,0,0,0,0,0,,5/12/199,DMONSON,GLBA,H,980.25976,0.392103904,0,6466233.133,441183.3898,6466723.504,442033.0075,,,
1999,5,315,14,0,1,0,0,0,0,0,,5/13/199,DMONSON,GLBA,H,1763.57855,0.70543142,0,6482778.776,444245.4669,6483659.326,445773.0148,,,
1999,3,329,4,0,1,0,0,0,0,0,,5/10/199,DMONSON,GLBA,L,2054.84776,0.821939104,0,6510820.874,438710.722,6511849.27,440490.69,,,
1999,2,329,2,0,1,0,0,0,0,0,,5/9/99,DMONSON,GLBA,L,1605.68129,0.642272516,0,6512561.109,438525.0185,6513363.421,439914.9941,,,
1999,2,330,2,0,1,0,0,0,0,0,,5/9/99,DMONSON,GLBA,L,1210.02687,0.484010748,0,6511580.539,436826.6494,6512185.407,437874.5982,,,
1999,5,330,14,0,1,0,0,0,0,0,,5/13/199,DMONSON,GLBA,L,1592.49876,0.636999504,0,6512561.109,438525.0185,6513358.034,439903.337,,,
1999,5,331,14,0,1,0,0,0,0,0,,5/13/199,DMONSON,GLBA,L,1210.02687,0.484010748,0,6511580.539,436826.6494,6512185.407,437874.5982,,,
1999,3,332,4,0,1,0,0,0,4,0,,5/10/199,DMONSON,GLBA,L,1937.77085,0.77510834,0,6509629.02,436645.2323,6510598.718,438323.0794,,,
1999,1,332,6,0,1,0,0,0,3,0,,5/8/99,DMONSON,GLBA,L,3987.15722,1.594862888,0,6510677.895,436862.1384,6512672.349,440315.2158,,,
1999,4,332,6,0,1,0,0,0,2,0,,5/12/199,DMONSON,GLBA,L,3987.15722,1.594862888,0,6510677.895,436862.1384,6512672.349,440315.2158,,,
1999,3,334,4,0,1,0,0,0,4,0,,5/10/199,DMONSON,GLBA,L,1477.21536,0.590886144,0,6507798.059,433476.2161,6508537.379,434754.9286,,,
1999,3,335,4,0,1,0,0,0,4,0,,5/10/199,DMONSON,GLBA,L,2010.48761,0.804195044,0,6507576.498,437889.6528,6508582.87,439631.3744,,,
1999,1,335,6,0,1,0,0,0,4,0,,5/8/99,DMONSON,GLBA,L,955.0301,0.38201204,0,6508141.442,437268.9982,6508620.04,438095.6066,,,
1999,4,335,6,0,1,0,0,0,0,0,,5/12/199,DMONSON,GLBA,L,955.0301,0.38201204,0,6508141.442,437268.9982,6508620.04,438095.6066,,,
1999,2,335,2,0,1,0,0,0,0,0,,5/9/99,DMONSON,GLBA,L,697.34867,0.278939468,0,6509333.132,432933.8123,6509680.968,433538.3928,,,
1999,5,335,14,0,1,0,0,0,0,0,,5/13/199,DMONSON,GLBA,L,697.34867,0.278939468,0,6509333.132,432933.8123,6509680.968,433538.3928,,,
1999,3,336,4,0,1,0,0,0,4,0,,5/10/199,DMONSON,GLBA,L,823.88172,0.329552688,0,6506877.218,431880.8063,6507289.849,432593.251,,,
1999,2,336,2,0,1,0,0,0,0,0,,5/9/99,DMONSON,GLBA,L,970.72896,0.388291584,0,6508827.478,436855.2087,6509311.323,437696.2959,,,
1999,5,336,14,0,1,0,0,0,0,0,,5/13/199,DMONSON,GLBA,L,1229.7346,0.49189384,0,6508827.478,436855.2087,6509441.386,437919.4715,,,
1999,1,336,6,0,1,0,0,0,4,0,,5/8/99,DMONSON,GLBA,L,4582.91508,1.833166032,0,6507464.742,431297.9781,6509755.721,435265.8227,,,
1999,4,336,6,0,1,0,0,0,4,0,,5/12/199,DMONSON,GLBA,L,4582.91508,1.833166032,0,6507464.742,431297.9781,6509755.721,435265.8227,,,
1999,3,338,4,0,1,0,0,0,0,0,,5/10/199,DMONSON,GLBA,L,1568.49323,0.627397292,0,6506341.46,440548.2439,6507124.594,441905.8591,,,
1999,1,338,6,0,1,0,0,0,4,0,,5/8/99,DMONSON,GLBA,L,1769.15253,0.707661012,0,6506909.595,439932.8606,6507793.822,441464.8245,,,
1999,4,338,6,0,1,0,0,0,4,0,,5/12/199,DMONSON,GLBA,L,1769.15253,0.707661012,0,6506909.595,439932.8606,6507793.822,441464.8245,,,
1999,3,339,4,0,1,0,0,0,4,0,,5/10/199,DMONSON,GLBA,L,2048.45911,0.819383644,0,6505508.306,434307.7953,6506531.144,436081.6344,,,
1999,1,339,6,0,1,0,0,0,4,0,,5/8/99,DMONSON,GLBA,L,2690.13895,1.07605558,0,6505884.553,433358.4077,6507228.119,435687.3691,,,
1999,4,339,6,0,1,0,0,0,0,0,,5/12/199,DMONSON,GLBA,L,2690.13895,1.07605558,0,6505884.553,433358.4077,6507228.119,435687.3691,,,
1999,2,339,2,0,1,0,0,0,0,0,,5/9/99,DMONSON,GLBA,L,1701.28187,0.680512748,0,6507185.083,438811.7297,6508034.516,440284.4113,,,
1999,5,339,14,0,1,0,0,0,0,0,,5/13/199,DMONSON,GLBA,L,2480.00779,0.992003116,0,6507185.083,438811.7297,6508425.101,440959.6326,,,
1999,3,340,4,0,1,0,0,0,4,0,,5/10/199,DMONSON,GLBA,L,1592.00361,0.636801444,0,6505210.106,428992.4441,6506005.604,430370.5468,,,
1999,2,340,2,0,1,0,0,0,0,0,,5/9/99,DMONSON,GLBA,L,1161.1679,0.46446716,0,6507106.325,433875.9177,6507687.023,434880.7003,,,
1999,5,340,14,0,1,0,0,0,0,0,,5/13/199,DMONSON,GLBA,L,1443.9517,0.57758068,0,6506965.722,433631.0313,6507687.023,434880.7003,,,
1999,1,341,6,0,1,0,0,0,3,0,,5/8/99,DMONSON,GLBA,L,1620.29444,0.648117776,0,6504830.988,441135.0462,6505643.362,442537.9368,,,
1999,4,341,6,0,1,0,0,0,4,0,,5/12/199,DMONSON,GLBA,L,1620.29444,0.648117776,0,6504830.988,441135.0462,6505643.362,442537.9368,,,
1999,3,341,4,0,1,0,0,0,0,0,,5/10/199,DMONSON,GLBA,L,1563.79256,0.625517024,0,6504969.734,438174.6792,6505752.118,439528.4275,,,
1999,5,341,14,0,1,0,0,0,0,0,,5/13/199,DMONSON,GLBA,L,452.90475,0.1811619,0,6506421.351,432690.2694,6506648.448,433082.6133,,,
1999,1,342,6,0,1,0,0,0,4,0,,5/8/99,DMONSON,GLBA,L,3282.71478,1.313085912,0,6504507.487,435774.7786,6506148.76,438616.6514,,,
1999,4,342,6,0,1,0,0,0,4,0,,5/12/199,DMONSON,GLBA,L,3282.71478,1.313085912,0,6504507.487,435774.7786,6506148.76,438616.6514,,,
1999,2,342,2,0,1,0,0,0,0,0,,5/9/99,DMONSON,GLBA,L,349.96255,0.13998502,0,6506421.351,432690.2694,6506598.007,432993.8197,,,
1999,3,343,4,0,1,0,0,0,0,0,,5/10/199,DMONSON,GLBA,L,1709.06904,0.683627616,0,6503796.14,436141.0786,6504650.043,437621.5095,,,
1999,1,343,6,0,1,0,0,0,3,0,,5/8/99,DMONSON,GLBA,L,1611.98345,0.64479338,0,6503881.534,429888.6884,6504686.321,431284.6187,,,
1999,4,343,6,0,1,0,0,0,4,0,,5/12/199,DMONSON,GLBA,L,1611.98345,0.64479338,0,6503881.534,429888.6884,6504686.321,431284.6187,,,
1999,2,343,2,0,1,0,0,0,4,0,,5/9/99,DMONSON,GLBA,L,1854.29603,0.741718412,0,6505720.893,426674.4901,6506646.868,428280.4774,,,
1999,5,343,14,0,1,0,0,0,0,0,,5/13/199,DMONSON,GLBA,L,1854.29603,0.741718412,0,6505720.893,426674.4901,6506646.868,428280.4774,,,
1999,3,344,4,0,1,0,0,0,4,0,,5/10/199,DMONSON,GLBA,L,1823.8811,0.72955244,0,6503343.751,425759.2772,6504255.032,427338.1421,,,
1999,2,344,2,0,1,0,0,0,4,0,,5/9/99,DMONSON,GLBA,L,942.85873,0.377143492,0,6505525.602,440738.7081,6505997.676,441554.6795,,,
1999,5,344,14,0,1,0,0,0,0,0,,5/13/199,DMONSON,GLBA,L,942.85873,0.377143492,0,6505525.602,440738.7081,6505997.676,441554.6795,,,
1999,1,344,6,0,1,0,0,0,2,0,,5/8/99,DMONSON,GLBA,L,5517.16799,2.206867196,0,6503745.348,424855.0617,6506503.372,429631.5774,,,
1999,4,344,6,0,1,0,0,0,4,0,,5/12/199,DMONSON,GLBA,L,5517.16799,2.206867196,0,6503745.348,424855.0617,6506503.372,429631.5774,,,
1999,3,345,4,0,1,0,0,0,4,0,,5/10/199,DMONSON,GLBA,L,1772.9719,0.70918876,0,6503003.953,429970.5522,6503889.852,431505.5012,,,
1999,1,345,6,0,1,0,0,0,4,0,,5/8/99,DMONSON,GLBA,L,1678.58239,0.671432956,0,6503598.094,438997.9397,6504436.778,440451.4437,,,
1999,4,345,6,0,1,0,0,0,4,0,,5/12/199,DMONSON,GLBA,L,1678.58239,0.671432956,0,6503598.094,438997.9397,6504436.778,440451.4437,,,
1999,2,345,2,0,1,0,0,0,4,0,,5/9/99,DMONSON,GLBA,L,1001.73812,0.400695248,0,6505000.59,435029.9561,6505502.186,435897.5159,,,
1999,5,345,14,0,1,0,0,0,0,0,,5/13/199,DMONSON,GLBA,L,1001.73812,0.400695248,0,6505000.59,435029.9561,6505502.186,435897.5159,,,
1999,1,346,6,0,1,0,0,0,4,0,,5/8/99,DMONSON,GLBA,L,1645.71208,0.658284832,0,6502364.449,436863.3069,6503187.956,438288.5005,,,
1999,4,346,6,0,1,0,0,0,4,0,,5/12/199,DMONSON,GLBA,L,1645.71208,0.658284832,0,6502364.449,436863.3069,6503187.956,438288.5005,,,
1999,3,346,4,0,1,0,0,0,0,0,,5/10/199,DMONSON,GLBA,L,7028.86786,2.811547144,0,6501568.355,437082.5729,6505082.839,443169.4689,,,
1999,2,346,2,0,1,0,0,0,4,0,,5/9/99,DMONSON,GLBA,L,1594.15707,0.637662828,0,6504579.052,429500.0631,6505376.535,430881.2072,,,
1999,5,346,14,0,1,0,0,0,0,0,,5/13/199,DMONSON,GLBA,L,1594.15707,0.637662828,0,6504579.052,429500.0631,6505376.535,430881.2072,,,
1999,3,347,4,0,1,0,0,0,4,0,,5/10/199,DMONSON,GLBA,L,1817.5465,0.7270186,0,6500527.954,430482.4481,6501437.521,432056.3701,,,
1999,1,347,6,0,1,0,0,0,4,0,,5/8/99,DMONSON,GLBA,L,423.03755,0.16921502,0,6501951.113,431347.542,6502163.69,431714.0375,,,
1999,4,347,6,0,1,0,0,0,4,0,,5/12/199,DMONSON,GLBA,L,423.03755,0.16921502,0,6501951.113,431347.542,6502163.69,431714.0375,,,
1999,2,347,2,0,1,0,0,0,0,0,,5/9/99,DMONSON,GLBA,L,1481.47853,0.592591412,0,6504396.763,424382.2896,6505136.797,425664.9311,,,
1999,5,347,14,0,1,0,0,0,0,0,,5/13/199,DMONSON,GLBA,L,1684.83646,0.673934584,0,6504329.061,438664.2854,6505171.243,440123.4515,,,
1999,3,348,4,1,1,1,0,1,0,0,30,5/10/199,DMONSON,GLBA,L,1560.9571,0.62438284,0,6500524.477,440073.1946,6501305.712,441425.1316,441287.9846,6501218.957,19991030
1999,1,348,6,0,1,0,0,0,4,0,,5/8/99,DMONSON,GLBA,L,892.38364,0.356953456,0,6501705.477,440520.873,6502154.041,441293.7772,,,
1999,4,348,6,0,1,0,0,0,4,0,,5/12/199,DMONSON,GLBA,L,892.38364,0.356953456,0,6501705.477,440520.873,6502154.041,441293.7772,,,
1999,5,348,14,0,1,0,0,0,0,0,,5/13/199,DMONSON,GLBA,L,1659.60405,0.66384162,0,6504306.959,424227.7782,6505136.797,425664.9311,,,
1999,2,348,2,0,1,0,0,0,4,0,,5/9/99,DMONSON,GLBA,L,1761.65588,0.704662352,0,6504291.13,438597.9501,6505171.243,440123.4515,,,
1999,3,349,4,0,1,0,0,0,0,0,,5/10/199,DMONSON,GLBA,L,1671.30008,0.668520032,0,6499212.595,437801.4789,6500047.264,439248.0862,,,
1999,1,349,6,0,1,0,0,0,3,0,,5/8/99,DMONSON,GLBA,L,742.62289,0.297049156,0,6501290.315,430199.9859,6501661.201,430843.2232,,,
1999,4,349,6,0,1,0,0,0,4,0,,5/12/199,DMONSON,GLBA,L,742.62289,0.297049156,0,6501290.315,430199.9859,6501661.201,430843.2232,,,
1999,2,349,2,0,1,0,0,0,4,0,,5/9/99,DMONSON,GLBA,L,1760.87924,0.704351696,0,6502999.955,436363.0063,6503881.066,437888.5901,,,
1999,5,349,14,0,1,0,0,0,0,0,,5/13/199,DMONSON,GLBA,L,1342.08684,0.536834736,0,6503541.41,442099.8143,6504212.882,443261.1579,,,
1999,3,350,4,1,1,1,0,1,0,0,31,5/10/199,DMONSON,GLBA,L,4082.05044,1.632820176,0,6498822.291,441925.0445,6500862.925,445458.8918,442756.4989,6499290.428,19991031
1999,1,350,6,0,1,0,0,0,0,0,,5/8/99,DMONSON,GLBA,L,903.25392,0.361301568,0,6500671.456,443526.8701,6501122.332,444309.3161,,,
1999,4,350,6,0,1,0,0,0,4,0,,5/12/199,DMONSON,GLBA,L,903.25392,0.361301568,0,6500671.456,443526.8701,6501122.332,444309.3161,,,
1999,2,350,2,0,1,0,0,0,4,0,,5/9/99,DMONSON,GLBA,L,716.97888,0.286791552,0,6502643.102,430947.7163,6503003.369,431568.2286,,,
1999,5,350,14,0,1,0,0,0,0,0,,5/13/199,DMONSON,GLBA,L,1666.19316,0.666477264,0,6502999.955,436363.0063,6503834.118,437806.6254,,,
1999,3,351,4,0,1,0,0,0,4,0,,5/10/199,DMONSON,GLBA,L,2130.9203,0.85236812,0,6498588.868,431921.4609,6499654.03,433766.5588,,,
1999,1,351,6,0,1,0,0,0,4,0,,5/8/99,DMONSON,GLBA,L,1600.71013,0.640284052,0,6499887.707,437368.9907,6500686.045,438754.8884,,,
1999,4,351,6,0,1,0,0,0,4,0,,5/12/199,DMONSON,GLBA,L,1600.71013,0.640284052,0,6499887.707,437368.9907,6500686.045,438754.8884,,,
1999,2,351,2,0,1,0,0,0,4,0,,5/9/99,DMONSON,GLBA,L,1098.27383,0.439309532,0,6502297.136,439943.7866,6502844.966,440894.1649,,,
1999,5,351,14,0,1,0,0,0,0,0,,5/13/199,DMONSON,GLBA,L,890.31517,0.356126068,0,6502857.854,426518.9369,6503303.716,427289.4237,,,
1999,3,352,4,0,1,0,0,0,0,0,,5/10/199,DMONSON,GLBA,L,1662.08411,0.664833644,0,6497758.553,444881.8882,6498590.355,446321.5681,,,
1999,1,352,6,0,1,0,0,0,4,0,,5/8/99,DMONSON,GLBA,L,1599.99136,0.639996544,0,6499477.144,431861.4758,6500277.274,433246.8162,,,
1999,4,352,6,0,1,0,0,0,4,0,,5/12/199,DMONSON,GLBA,L,1599.99136,0.639996544,0,6499477.144,431861.4758,6500277.274,433246.8162,,,
1999,2,352,2,0,1,0,0,0,4,0,,5/9/99,DMONSON,GLBA,L,428.33515,0.17133406,0,6502139.016,430072.0346,6502353.243,430443.4539,,,
1999,5,352,14,0,1,0,0,0,0,0,,5/13/199,DMONSON,GLBA,L,1873.5915,0.7494366,0,6502065.181,429945.9182,6503003.369,431568.2286,,,
1999,3,353,4,0,1,0,0,0,0,0,,5/10/199,DMONSON,GLBA,L,1721.22306,0.688489224,0,6497676.429,435141.9729,6498537.272,436631.8021,,,
1999,1,353,6,0,1,0,0,0,2,0,,5/8/99,DMONSON,GLBA,L,1633.73926,0.653495704,0,6498445.554,444469.5007,6499260.839,445884.5971,,,
1999,4,353,6,0,1,0,0,0,4,0,,5/12/199,DMONSON,GLBA,L,1633.73926,0.653495704,0,6498445.554,444469.5007,6499260.839,445884.5971,,,
1999,2,353,2,0,1,0,0,0,4,0,,5/9/99,DMONSON,GLBA,L,1486.70689,0.594682756,0,6500653.081,437096.8105,6501397.2,438383.9329,,,
1999,5,353,14,1,1,2,0,2,0,0,44,5/13/199,DMONSON,GLBA,L,4865.68834,1.946275336,0,6500653.081,437096.8105,6503085.528,441309.7619,440490.5867,6502656.049,19991044
1999,3,354,4,1,1,1,0,1,4,0,28,5/10/199,DMONSON,GLBA,L,895.86744,0.358346976,0,6497054.019,443661.3364,6497503.179,444436.7063,444295.7833,6497414.978,19991028
1999,3,354,4,2,1,7,0,7,4,0,,5/10/199,DMONSON,GLBA,L,895.86744,0.358346976,0,6497054.019,443661.3364,6497503.179,444436.7063,443871.1523,6497114.199,
1999,3,354,4,3,1,2,0,2,4,0,,5/10/199,DMONSON,GLBA,L,895.86744,0.358346976,0,6497054.019,443661.3364,6497503.179,444436.7063,444101.1607,6497238.049,
1999,1,354,6,0,1,0,0,0,4,0,,5/8/99,DMONSON,GLBA,L,3156.36186,1.262544744,0,6498428.239,439642.0556,6500005.313,442375.2643,,,
1999,4,354,6,0,1,0,0,0,4,0,,5/12/199,DMONSON,GLBA,L,3156.36186,1.262544744,0,6498428.239,439642.0556,6500005.313,442375.2643,,,
1999,2,354,2,0,1,0,0,0,4,0,,5/9/99,DMONSON,GLBA,L,1461.39836,0.584559344,0,6500170.932,431461.3205,6500900.606,432726.2753,,,
1999,5,354,14,0,1,0,0,0,0,0,,5/13/199,DMONSON,GLBA,L,1696.90846,0.678763384,0,6500052.029,431256.9472,6500900.606,432726.2753,,,
1999,3,355,4,0,1,0,0,0,4,0,,5/10/199,DMONSON,GLBA,L,1600.24959,0.640099836,0,6495609.122,436359.4116,6496408.993,437745.1047,,,
1999,1,355,6,0,1,0,0,0,4,0,,5/8/99,DMONSON,GLBA,L,1145.33588,0.458134352,0,6497480.437,442800.8015,6498054.357,443792.9467,,,
1999,4,355,6,0,1,0,0,0,0,0,,5/12/199,DMONSON,GLBA,L,1145.33588,0.458134352,0,6497480.437,442800.8015,6498054.357,443792.9467,,,
1999,2,355,2,0,1,0,0,0,0,0,,5/9/99,DMONSON,GLBA,L,127.06893,0.050827572,0,6500152.453,445831.1789,6500217.737,445941.4338,,,
1999,5,355,14,0,1,0,0,0,0,0,,5/13/199,DMONSON,GLBA,L,3079.0751,1.23163004,0,6498712.432,443335.828,6500252.162,446001.9071,,,
1999,3,356,4,0,1,0,0,0,4,0,,5/10/199,DMONSON,GLBA,L,854.10204,0.341640816,0,6495206.553,440462.3018,6495635.208,441202.266,,,
1999,1,356,6,0,1,0,0,0,4,0,,5/8/99,DMONSON,GLBA,L,3594.48639,1.437794556,0,6497273.573,432844.7381,6499071.716,435957.0535,,,
1999,4,356,6,0,1,0,0,0,4,0,,5/12/199,DMONSON,GLBA,L,3594.48639,1.437794556,0,6497273.573,432844.7381,6499071.716,435957.0535,,,
1999,5,356,14,1,1,22,0,22,0,0,,5/13/199,DMONSON,GLBA,L,3725.58781,1.490235124,1,6498662.2,438449.0835,6500524.291,441674.637,441588.4621,6500532.591,
1999,2,356,2,0,1,0,0,0,0,0,,5/9/99,DMONSON,GLBA,L,1469.07448,0.587629792,0,6499817.138,440448.4714,6500551.444,441720.5219,,,
1999,3,357,4,0,1,0,0,0,4,0,,5/10/199,DMONSON,GLBA,L,3036.2951,1.21451804,0,6493228.008,437033.1481,6494745.552,439662.5583,,,
1999,1,357,6,0,1,0,0,0,4,0,,5/8/99,DMONSON,GLBA,L,1612.38522,0.644954088,0,6496361.954,436063.6411,6497168.972,437459.9055,,,
1999,4,357,6,0,1,0,0,0,0,0,,5/12/199,DMONSON,GLBA,L,1612.38522,0.644954088,0,6496361.954,436063.6411,6497168.972,437459.9055,,,
1999,5,357,14,0,1,0,0,0,0,0,,5/13/199,DMONSON,GLBA,L,3379.83037,1.351932148,0,6497772.64,432107.6635,6499461.923,435034.2309,,,
1999,2,357,2,0,1,0,0,0,0,0,,5/9/99,DMONSON,GLBA,L,2586.24793,1.034499172,0,6498712.432,443335.828,6500005.681,445575.5928,,,
1999,3,358,4,1,1,1,0,1,2,0,26,5/10/199,DMONSON,GLBA,L,1760.9591,0.70438364,0,6492688.684,440901.8923,6493569.779,442426.4582,440987.2064,6492857.221,19991026
1999,1,358,6,1,1,30,0,30,4,0,,5/8/99,DMONSON,GLBA,L,1120.29556,0.448118224,1,6496223.059,440623.1204,6496783.786,441592.4757,441098.5493,6496551.073,
1999,4,358,6,0,1,0,0,0,0,0,,5/12/199,DMONSON,GLBA,L,1120.29556,0.448118224,0,6496223.059,440623.1204,6496783.786,441592.4757,,,
1999,5,358,14,0,1,0,0,0,0,0,,5/13/199,DMONSON,GLBA,L,2188.16936,0.875267744,0,6497279.38,440851.2921,6498372.123,442746.114,,,
1999,2,358,2,0,1,0,0,0,0,0,,5/9/99,DMONSON,GLBA,L,1528.14683,0.611258732,0,6498662.2,438449.0835,6499426.638,439771.7332,,,
1999,3,359,4,0,1,0,0,0,0,0,,5/10/199,DMONSON,GLBA,L,6872.41403,2.748965612,0,6488836.392,434227.2164,6492272.806,440178.9966,,,
1999,1,359,6,0,1,0,0,0,4,0,,5/8/99,DMONSON,GLBA,L,2517.60447,1.007041788,0,6495928.124,444912.1969,6497187.838,447092.4812,,,
1999,4,359,6,0,1,0,0,0,0,0,,5/12/199,DMONSON,GLBA,L,2517.60447,1.007041788,0,6495928.124,444912.1969,6497187.838,447092.4812,,,
1999,2,359,2,0,1,0,0,0,4,0,,5/9/99,DMONSON,GLBA,L,1599.98508,0.639994032,0,6497125.624,435787.5384,6497925.308,437171.8586,,,
1999,5,359,14,0,1,0,0,0,0,0,,5/13/199,DMONSON,GLBA,L,1599.98508,0.639994032,0,6497125.624,435787.5384,6497925.308,437171.8586,,,
1999,2,359,2,0,1,0,0,0,0,0,,5/9/99,DMONSON,GLBA,L,580.13316,0.232053264,0,6498082.566,442244.1887,6498372.123,442746.114,,,
1999,3,360,4,1,1,2,0,2,1,0,24,5/10/199,DMONSON,GLBA,L,5298.53597,2.119414388,0,6486956.543,435770.6647,6489604.831,440358.4101,436634.747,6487506.941,19991024
1999,1,360,6,0,1,0,0,0,4,0,,5/8/99,DMONSON,GLBA,L,2105.83804,0.842335216,0,6494103.545,436950.3412,6495156.59,438773.569,,,
1999,4,360,6,0,1,0,0,0,0,0,,5/12/199,DMONSON,GLBA,L,2105.83804,0.842335216,0,6494103.545,436950.3412,6495156.59,438773.569,,,
1999,5,360,14,0,1,0,0,0,0,0,,5/13/199,DMONSON,GLBA,L,2830.65221,1.132260884,0,6496444.852,444205.6209,6497860.062,446657.176,,,
1999,2,360,2,0,1,0,0,0,4,0,,5/9/99,DMONSON,GLBA,L,3091.92311,1.236769244,0,6497916.793,432357.1086,6499461.923,435034.2309,,,
1999,3,361,4,0,1,0,0,0,0,0,,5/10/199,DMONSON,GLBA,L,3766.21483,1.506485932,0,6484506.728,436329.0002,6486390.886,439589.7597,,,
1999,1,361,6,0,1,0,0,0,3,0,,5/8/99,DMONSON,GLBA,L,9252.17886,3.700871544,0,6489630.876,434001.8594,6494255.181,442014.0023,,,
1999,4,361,6,0,1,0,0,0,0,0,,5/12/199,DMONSON,GLBA,L,9252.17886,3.700871544,0,6489630.876,434001.8594,6494255.181,442014.0023,,,
1999,5,361,14,0,1,0,0,0,0,0,,5/13/199,DMONSON,GLBA,L,1583.3735,0.6333494,0,6494888.755,436714.942,6495681.562,438086.1618,,,
1999,2,361,2,0,1,0,0,0,0,0,,5/9/99,DMONSON,GLBA,L,434.84,0.173936,0,6497279.38,440851.2921,6497496.399,441228.3837,,,
1999,3,362,4,0,1,0,0,0,0,0,,5/10/199,DMONSON,GLBA,L,2274.4969,0.90979876,0,6482374.902,437434.7134,6483511.378,439404.3988,,,
1999,1,362,6,0,1,0,0,0,4,0,,5/8/99,DMONSON,GLBA,L,5823.99212,2.329596848,0,6487438.707,435008.6245,6490351.913,440052.5619,,,
1999,4,362,6,0,1,0,0,0,0,0,,5/12/199,DMONSON,GLBA,L,5823.99212,2.329596848,0,6487438.707,435008.6245,6490351.913,440052.5619,,,
1999,5,362,14,0,1,0,0,0,0,0,,5/13/199,DMONSON,GLBA,L,1361.30873,0.544523492,0,6494289.493,440474.4769,6494971.42,441652.5436,,,
1999,3,363,4,0,1,0,0,0,0,0,,5/10/199,DMONSON,GLBA,L,2101.66369,0.840665476,0,6480068.134,438238.3444,6481118.235,440057.8392,,,
1999,1,363,6,0,1,0,0,0,4,0,,5/8/99,DMONSON,GLBA,L,4797.79258,1.919117032,0,6485598.928,436619.7168,6487996.775,440774.6009,,,
1999,4,363,6,0,1,0,0,0,0,0,,5/12/199,DMONSON,GLBA,L,4797.79258,1.919117032,0,6485598.928,436619.7168,6487996.775,440774.6009,,,
1999,5,363,14,0,1,0,0,0,0,0,,5/13/199,DMONSON,GLBA,L,2701.31059,1.080524236,0,6492390.349,437184.4876,6493741.744,439522.9637,,,
1999,2,363,2,0,1,0,0,0,0,0,,5/9/99,DMONSON,GLBA,L,2549.00922,1.019603688,0,6496586.133,444449.7887,6497860.062,446657.176,,,
1999,3,364,4,0,1,0,0,0,4,0,,5/10/199,DMONSON,GLBA,L,5030.52901,2.012211604,0,6477342.29,438317.1081,6479857.895,442673.7883,,,
1999,1,364,6,0,1,0,0,0,4,0,,5/8/99,DMONSON,GLBA,L,3372.89875,1.3491595,0,6483310.019,437454.5015,6484996.12,440375.5508,,,
1999,4,364,6,1,1,1,0,1,0,0,36,5/12/199,DMONSON,GLBA,L,3372.89875,1.3491595,0,6483310.019,437454.5015,6484996.12,440375.5508,440067.4807,6484868.854,19991036
1999,5,364,14,0,1,0,0,0,0,0,,5/13/199,DMONSON,GLBA,L,1369.34061,0.547736244,0,6491943.492,441209.6692,6492629.237,442396.1055,,,
1999,2,364,2,0,1,0,0,0,4,0,,5/9/99,DMONSON,GLBA,L,1569.64002,0.627856008,0,6494897.845,436726.7183,6495681.562,438086.1618,,,
1999,3,365,4,0,1,0,0,0,4,0,,5/10/199,DMONSON,GLBA,L,7277.4837,2.91099348,0,6474853.158,438807.8793,6478492.348,445109.8872,,,
1999,1,365,6,0,1,0,0,0,1,0,,5/8/99,DMONSON,GLBA,L,2507.4043,1.00296172,0,6481209.242,438614.176,6482462.036,440786.0911,,,
1999,4,365,6,0,1,0,0,0,0,0,,5/12/199,DMONSON,GLBA,L,2507.4043,1.00296172,0,6481209.242,438614.176,6482462.036,440786.0911,,,
1999,5,365,14,0,1,0,0,0,0,0,,5/13/199,DMONSON,GLBA,L,1677.61941,0.671047764,0,6490531.7,433964.6776,6491370.478,435418.2872,,,
1999,2,365,2,0,1,0,0,0,4,0,,5/9/99,DMONSON,GLBA,L,1361.30873,0.544523492,0,6494289.493,440474.4769,6494971.42,441652.5436,,,
1999,3,366,4,0,1,0,0,0,4,0,,5/10/199,DMONSON,GLBA,L,7579.51572,3.031806288,0,6472400.339,439356.4179,6476189.041,445919.8732,,,
1999,1,366,6,0,1,0,0,0,3,0,,5/8/99,DMONSON,GLBA,L,4424.88448,1.769953792,0,6478221.396,438239.4389,6480432.815,442071.3904,,,
1999,4,366,6,1,1,1,0,1,0,0,35,5/12/199,DMONSON,GLBA,L,4424.88448,1.769953792,0,6478221.396,438239.4389,6480432.815,442071.3904,440983.2426,6479735.768,19991035
1999,5,366,14,0,1,0,0,0,0,0,,5/13/199,DMONSON,GLBA,L,6429.46039,2.571784156,0,6488150.137,434640.8724,6491364.774,440207.7665,,,
1999,2,366,2,0,1,0,0,0,4,0,,5/9/99,DMONSON,GLBA,L,2456.24144,0.982496576,0,6492513.165,437395.9099,6493741.744,439522.9637,,,
1999,3,367,4,0,1,0,0,0,4,0,,5/10/199,DMONSON,GLBA,L,6622.58995,2.64903598,0,6470188.029,440327.7127,6473499.71,446063.0957,,,
1999,1,367,6,1,1,1,0,1,4,0,,5/8/99,DMONSON,GLBA,L,6754.0499,2.70161996,0,6475706.958,438685.8149,6479085.045,444535.395,439388.7425,6476081.568,
1999,4,367,6,0,1,0,0,0,0,0,,5/12/199,DMONSON,GLBA,L,6754.0499,2.70161996,0,6475706.958,438685.8149,6479085.045,444535.395,,,
1999,5,367,14,2,1,1,0,1,0,0,49,5/13/199,DMONSON,GLBA,L,6156.45559,2.462582236,0,6486364.335,436346.5774,6489442.017,441677.5969,439461.0427,6488219.531,19992049
1999,5,367,14,1,1,1,0,1,0,0,,5/13/199,DMONSON,GLBA,L,6156.45559,2.462582236,0,6486364.335,436346.5774,6489442.017,441677.5969,441062.558,6489088.926,
1999,2,367,2,0,1,0,0,0,4,0,,5/9/99,DMONSON,GLBA,L,30.96749,0.012386996,0,6492276.602,436986.7747,6492292.865,437014.1888,,,
1999,3,368,4,0,1,0,0,0,4,0,,5/10/199,DMONSON,GLBA,L,4278.25026,1.711300104,0,6468209.454,441699.7312,6470348.183,445404.5902,,,
1999,1,368,6,1,1,1,0,1,1,0,8,5/8/99,DMONSON,GLBA,L,7869.36688,3.147746752,0,6473217.925,439174.1388,6477153.173,445988.6318,440698.0194,6474135.344,19991008
1999,4,368,6,0,1,0,0,0,0,0,,5/12/199,DMONSON,GLBA,L,7869.36688,3.147746752,0,6473217.925,439174.1388,6477153.173,445988.6318,,,
1999,5,368,14,0,1,0,0,0,0,0,,5/13/199,DMONSON,GLBA,L,3494.66265,1.39786506,0,6483784.677,436675.8689,6485529.83,439701.7769,,,
1999,2,368,2,0,1,0,0,0,4,0,,5/9/99,DMONSON,GLBA,L,5929.85098,2.371940392,0,6488150.137,434640.8724,6491115.272,439776.1854,,,
1999,3,369,4,0,1,0,0,0,4,0,,5/10/199,DMONSON,GLBA,L,3488.51217,1.395404868,0,6466206.014,443029.8376,6467950.738,446050.4091,,,
1999,1,369,6,0,1,0,0,0,4,0,,5/8/99,DMONSON,GLBA,L,7090.87126,2.836348504,0,6470991.183,440114.671,6474534.527,446255.5425,,,
1999,4,369,6,1,1,1,0,1,0,0,33,5/12/199,DMONSON,GLBA,L,7090.87126,2.836348504,0,6470991.183,440114.671,6474534.527,446255.5425,441031.4414,6471542.11,19991033
1999,4,369,6,2,1,1,0,1,0,0,,5/12/199,DMONSON,GLBA,L,7090.87126,2.836348504,0,6470991.183,440114.671,6474534.527,446255.5425,440501.2641,6471204.724,
1999,5,369,14,0,1,0,0,0,0,0,,5/13/199,DMONSON,GLBA,L,2679.86938,1.071947752,0,6481661.953,437799.6324,6483001.104,440120.6455,,,
1999,2,369,2,0,1,0,0,0,4,0,,5/9/99,DMONSON,GLBA,L,4685.53407,1.874213628,0,6486362.527,436343.6344,6488705.874,440400.9895,,,
1999,1,370,6,0,1,0,0,0,4,0,,5/8/99,DMONSON,GLBA,L,5403.3203,2.16132812,0,6468779.069,441086.7645,6471482.707,445766.3828,,,
1999,4,370,6,0,1,0,0,0,0,0,,5/12/199,DMONSON,GLBA,L,5403.3203,2.16132812,0,6468779.069,441086.7645,6471482.707,445766.3828,,,
1999,5,370,14,0,1,0,0,0,0,0,,5/13/199,DMONSON,GLBA,L,3314.11187,1.325644748,0,6479049.886,438076.3638,6480707.573,440946.317,,,
1999,2,370,2,0,1,0,0,0,3,0,,5/9/99,DMONSON,GLBA,L,3185.01446,1.274005784,0,6483938.119,436943.6488,6485529.83,439701.7769,,,
1999,1,371,6,0,1,0,0,0,0,0,,5/8/99,DMONSON,GLBA,L,4350.69051,1.740276204,0,6466598.093,442105.3415,6468773.472,445873.412,,,
1999,4,371,6,0,1,0,0,0,0,0,,5/12/199,DMONSON,GLBA,L,4350.69051,1.740276204,0,6466598.093,442105.3415,6468773.472,445873.412,,,
1999,5,371,14,1,1,1,0,1,0,0,50,5/13/199,DMONSON,GLBA,L,5568.53928,2.227415712,0,6476595.073,438624.7093,6479378.973,443447.0291,442343.7711,6478724.832,19991050
1999,2,371,2,0,1,0,0,0,4,0,,5/9/99,DMONSON,GLBA,L,1836.20628,0.734482512,0,6481900.383,438214.6927,6482818.486,439804.8574,,,
1999,5,372,14,1,1,1,0,1,0,0,,5/13/199,DMONSON,GLBA,L,8734.52769,3.493811076,0,6474109.665,439117.7912,6478476.242,446682.1378,443373.3169,6476597.105,
1999,5,372,14,2,1,1,0,1,0,0,,5/13/199,DMONSON,GLBA,L,8734.52769,3.493811076,0,6474109.665,439117.7912,6478476.242,446682.1378,444585.8925,6477214.832,
1999,2,372,2,0,1,0,0,0,4,0,,5/9/99,DMONSON,GLBA,L,2314.24727,0.925698908,0,6479297.409,438505.4405,6480454.351,440508.7148,,,
1999,5,373,14,1,1,1,0,1,2,0,52,5/13/199,DMONSON,GLBA,L,7311.71874,2.924687496,0,6471720.135,439778.7393,6475375.39,446110.2548,439872.8629,6471769.679,19991052
1999,5,373,14,2,1,1,0,1,2,0,52,5/13/199,DMONSON,GLBA,L,7311.71874,2.924687496,0,6471720.135,439778.7393,6475375.39,446110.2548,440284.6808,6472044.225,19992052
1999,5,373,14,3,1,1,0,1,2,0,52,5/13/199,DMONSON,GLBA,L,7311.71874,2.924687496,0,6471720.135,439778.7393,6475375.39,446110.2548,440444.8324,6472112.861,19993052
1999,5,373,14,4,1,1,0,1,2,0,,5/13/199,DMONSON,GLBA,L,7311.71874,2.924687496,0,6471720.135,439778.7393,6475375.39,446110.2548,440604.9834,6472181.498,
1999,2,373,2,1,1,1,0,1,2,0,14,5/9/99,DMONSON,GLBA,L,5367.51623,2.147006492,0,6476582.42,438603.0927,6479266.737,443250.8331,439504.0497,6477038.205,19991014
1999,5,374,14,0,1,0,0,0,1,0,,5/13/199,DMONSON,GLBA,L,6973.61092,2.789444368,0,6468914.834,439719.2189,6472401.476,445759.557,,,
1999,2,374,2,0,1,0,0,0,4,0,,5/9/99,DMONSON,GLBA,L,7458.09231,2.983236924,0,6474115.05,439129.5651,6477845.376,445589.3996,,,
1999,5,375,14,1,1,1,1,2,1,0,53,5/13/199,DMONSON,GLBA,L,4366.86359,1.746745436,0,6467379.309,441862.1216,6469563.53,445644.3534,444860.439,6469115.739,19991053
1999,2,375,2,0,1,0,0,0,3,0,,5/9/99,DMONSON,GLBA,L,7105.14371,2.842057484,0,6471720.135,439778.7393,6475272.057,445931.5946,,,
1999,2,376,2,0,1,0,0,0,4,0,,5/9/99,DMONSON,GLBA,L,5522.63182,2.209052728,0,6469444.65,440639.2845,6472205.712,445421.5867,,,
1999,2,377,2,0,1,0,0,0,4,0,,5/9/99,DMONSON,GLBA,L,4097.51624,1.639006496,0,6467457.126,441996.9588,6469505.512,445545.0476,,,
1999,2,378,2,0,1,0,0,0,4,0,,5/9/99,DMONSON,GLBA,L,1008.75083,0.403500332,0,6466183.768,444590.3455,6466687.535,445463.1334,,,
2000,3,68,15,0,1,0,0,0,1,1,,5/14/200,DMONSON,GLBA,H,418.14824,0.167259296,0,6512521.681,440578.1796,6512738.906,440938.4122,,,
2000,2,73,7,0,1,0,0,0,1,1,,5/13/200,DMONSON,GLBA,H,438.19132,0.175276528,0,6512148.488,440707.5268,6512365.578,441077.4307,,,
2000,1,74,3,0,1,0,0,0,1,1,,5/12/200,DMONSON,GLBA,H,1034.52853,0.413811412,0,6511630.24,440612.7648,6512154.743,441518.0112,,,
2000,4,74,1,0,1,0,0,0,1,1,,5/15/200,DMONSON,GLBA,H,1034.52853,0.413811412,0,6511630.24,440612.7648,6512154.743,441518.0112,,,
2000,3,76,15,0,1,0,0,0,1,1,,5/14/200,DMONSON,GLBA,H,1678.94878,0.671579512,0,6505545.411,442887.2838,6506396.677,444339.3659,,,
2000,1,76,3,0,1,0,0,0,1,1,,5/12/200,DMONSON,GLBA,H,447.74468,0.179097872,0,6510383.239,438450.924,6510599.811,438840.4219,,,
2000,4,76,1,0,1,0,0,0,1,1,,5/15/200,DMONSON,GLBA,H,447.74468,0.179097872,0,6510383.239,438450.924,6510599.811,438840.4219,,,
2000,2,77,7,0,1,0,0,0,1,1,,5/13/200,DMONSON,GLBA,H,442.57561,0.177030244,0,6510304.956,442339.4989,6510540.616,442719.4037,,,
2000,3,78,15,0,1,0,0,0,1,1,,5/14/200,DMONSON,GLBA,H,478.18256,0.191273024,0,6503352.46,429481.696,6503586.169,429901.7378,,,
2000,3,79,15,0,1,0,0,0,1,1,,5/14/200,DMONSON,GLBA,H,586.40825,0.2345633,0,6503349.736,424675.2753,6503636.921,425183.6909,,,
2000,1,79,3,0,1,0,0,0,1,1,,5/12/200,DMONSON,GLBA,H,1018.56201,0.407424804,0,6507063.097,432717.8078,6507586.097,433605.8881,,,
2000,4,79,1,0,1,0,0,0,2,1,,5/15/200,DMONSON,GLBA,H,1018.56201,0.407424804,0,6507063.097,432717.8078,6507586.097,433605.8881,,,
2000,2,79,7,0,1,0,0,0,1,1,,5/13/200,DMONSON,GLBA,H,1679.87386,0.671949544,0,6507449.294,442161.8504,6508281.731,443613.1309,,,
2000,3,80,15,0,1,0,0,0,1,1,,5/14/200,DMONSON,GLBA,H,1730.47963,0.692191852,0,6501590.057,426421.4668,6502452.851,427927.4131,,,
2000,1,80,3,0,1,0,0,0,1,1,,5/12/200,DMONSON,GLBA,H,1286.76306,0.514705224,0,6506912.889,442037.9396,6507546.092,443148.4896,,,
2000,4,80,1,0,1,0,0,0,1,1,,5/15/200,DMONSON,GLBA,H,1286.76306,0.514705224,0,6506912.889,442037.9396,6507546.092,443148.4896,,,
2000,3,81,15,0,1,0,0,0,1,1,,5/14/200,DMONSON,GLBA,H,833.03252,0.333213008,0,6501155.131,444873.8097,6501571.857,445595.5433,,,
2000,3,82,15,0,1,0,0,0,1,1,,5/14/200,DMONSON,GLBA,H,416.90721,0.166762884,0,6500784.459,429841.5839,6501000.693,430203.5023,,,
2000,3,83,15,0,1,0,0,0,1,1,,5/14/200,DMONSON,GLBA,H,518.79766,0.207519064,0,6499851.366,442619.7741,6500123.177,443068.93,,,
2000,2,83,7,0,1,0,0,0,1,1,,5/13/200,DMONSON,GLBA,H,1412.3996,0.56495984,0,6505280.812,443211.9863,6505987.055,444430.1243,,,
2000,3,84,15,0,1,0,0,0,1,1,,5/14/200,DMONSON,GLBA,H,1464.57995,0.58583198,0,6499633.148,427836.4831,6500370.821,429108.2891,,,
2000,2,84,7,0,1,0,0,0,2,1,,5/13/200,DMONSON,GLBA,H,582.90957,0.233163828,0,6504791.019,427961.0515,6505078.63,428469.0295,,,
2000,1,84,3,0,1,0,0,0,1,1,,5/12/200,DMONSON,GLBA,H,1357.03873,0.542815492,0,6504871.304,443292.9936,6505541.013,444472.0661,,,
2000,4,84,1,0,1,0,0,0,1,1,,5/15/200,DMONSON,GLBA,H,1357.03873,0.542815492,0,6504871.304,443292.9936,6505541.013,444472.0661,,,
2000,2,85,7,0,1,0,0,0,2,1,,5/13/200,DMONSON,GLBA,H,807.71402,0.323085608,0,6503029.065,424939.8781,6503442.656,425634.4786,,,
2000,1,85,3,0,1,0,0,0,1,1,,5/12/200,DMONSON,GLBA,H,638.84143,0.255536572,0,6504436.43,437747.6204,6504743.103,438303.502,,,
2000,4,85,1,0,1,0,0,0,2,1,,5/15/200,DMONSON,GLBA,H,638.84143,0.255536572,0,6504436.43,437747.6204,6504743.103,438303.502,,,
2000,3,86,15,0,1,0,0,0,1,1,,5/14/200,DMONSON,GLBA,H,415.59833,0.166239332,0,6499023.994,445966.489,6499223.163,446327.3809,,,
2000,1,86,3,0,1,0,0,0,1,1,,5/12/200,DMONSON,GLBA,H,719.33624,0.287734496,0,6502762.965,425263.6078,6503122.235,425889.4839,,,
2000,4,86,1,0,1,0,0,0,1,1,,5/15/200,DMONSON,GLBA,H,719.33624,0.287734496,0,6502762.965,425263.6078,6503122.235,425889.4839,,,
2000,2,86,7,0,1,0,0,0,2,1,,5/13/200,DMONSON,GLBA,H,673.43876,0.269375504,0,6502834.483,429385.2616,6503176.555,429971.7241,,,
2000,1,87,3,0,1,0,0,0,1,1,,5/12/200,DMONSON,GLBA,H,424.47461,0.169789844,0,6502406.654,429435.5352,6502604.294,429796.9955,,,
2000,4,87,1,0,1,0,0,0,1,1,,5/15/200,DMONSON,GLBA,H,424.47461,0.169789844,0,6502406.654,429435.5352,6502604.294,429796.9955,,,
2000,2,87,7,0,1,0,0,0,1,1,,5/13/200,DMONSON,GLBA,H,467.74807,0.187099228,0,6502423.603,438266.7055,6502658.41,438676.6256,,,
2000,3,88,15,0,1,0,0,0,1,1,,5/14/200,DMONSON,GLBA,H,506.40298,0.202561192,0,6496910.942,447118.7465,6497164.845,447557.9788,,,
2000,3,89,15,0,1,0,0,0,1,1,,5/14/200,DMONSON,GLBA,H,1658.1059,0.66324236,0,6496506.664,441630.9446,6497339.197,443066.9799,,,
2000,1,89,3,0,1,0,0,0,1,1,,5/12/200,DMONSON,GLBA,H,1702.49201,0.680996804,0,6500841.461,426746.0153,6501705.095,428213.4832,,,
2000,4,89,1,0,1,0,0,0,2,1,,5/15/200,DMONSON,GLBA,H,1702.49201,0.680996804,0,6500841.461,426746.0153,6501705.095,428213.4832,,,
2000,3,90,15,0,1,0,0,0,1,1,,5/14/200,DMONSON,GLBA,H,417.74129,0.167096516,0,6495857.323,435711.4284,6496074.102,436073.4542,,,
2000,1,90,3,0,1,0,0,0,1,1,,5/12/200,DMONSON,GLBA,H,556.43243,0.222572972,0,6500679.94,445670.1597,6500970.257,446148.2787,,,
2000,4,90,1,0,1,0,0,0,1,1,,5/15/200,DMONSON,GLBA,H,556.43243,0.222572972,0,6500679.94,445670.1597,6500970.257,446148.2787,,,
2000,2,90,7,0,1,0,0,0,2,1,,5/13/200,DMONSON,GLBA,H,1764.3382,0.70573528,0,6501215.846,426578.8883,6502096.901,428104.6233,,,
2000,2,91,7,0,1,0,0,0,1,1,,5/13/200,DMONSON,GLBA,H,579.22136,0.231688544,0,6500963.158,445325.8141,6501253.029,445832.9424,,,
2000,3,92,15,0,1,0,0,0,1,1,,5/14/200,DMONSON,GLBA,H,5071.63156,2.028652624,0,6494983.081,429378.5159,6497504.726,433762.9476,,,
2000,3,93,15,0,1,0,0,0,1,1,,5/14/200,DMONSON,GLBA,H,5229.92787,2.091971148,0,6493818.791,446582.4987,6496450.641,451103.0681,,,
2000,1,93,3,0,1,0,0,0,1,1,,5/12/200,DMONSON,GLBA,H,482.91405,0.19316562,0,6498476.659,446626.8899,6498712.344,447036.6943,,,
2000,4,93,1,0,1,0,0,0,1,1,,5/15/200,DMONSON,GLBA,H,482.91405,0.19316562,0,6498476.659,446626.8899,6498712.344,447036.6943,,,
2000,2,93,7,0,1,0,0,0,2,1,,5/13/200,DMONSON,GLBA,H,447.38675,0.1789547,0,6500410.91,429970.343,6500626.637,430361.3095,,,
2000,3,94,15,0,1,0,0,0,1,1,,5/14/200,DMONSON,GLBA,H,549.28998,0.219715992,0,6493525.168,436448.5357,6493795.959,436918.2315,,,
2000,1,94,3,0,1,0,0,0,1,1,,5/12/200,DMONSON,GLBA,H,1972.00292,0.788801168,0,6497234.971,430077.9005,6498225.507,431790.2031,,,
2000,4,94,1,0,1,0,0,0,2,1,,5/15/200,DMONSON,GLBA,H,1972.00292,0.788801168,0,6497234.971,430077.9005,6498225.507,431790.2031,,,
2000,2,94,7,0,1,0,0,0,1,1,,5/13/200,DMONSON,GLBA,H,954.93694,0.381974776,0,6500145.763,439120.9116,6500615.453,439950.7386,,,
2000,3,95,15,0,1,0,0,0,1,1,,5/14/200,DMONSON,GLBA,H,3553.47726,1.421390904,0,6492883.494,430533.1823,6494648.977,433607.827,,,
2000,3,96,15,0,1,0,0,0,1,1,,5/14/200,DMONSON,GLBA,H,2400.28663,0.960114652,0,6491522.535,433001.7763,6492731.046,435078.1374,,,
2000,1,96,3,0,1,0,0,0,1,1,,5/12/200,DMONSON,GLBA,H,420.28381,0.168113524,0,6496425.057,428678.0344,6496622.631,429040.0762,,,
2000,4,96,1,0,1,0,0,0,1,1,,5/15/200,DMONSON,GLBA,H,420.28381,0.168113524,0,6496425.057,428678.0344,6496622.631,429040.0762,,,
2000,2,96,7,0,1,0,0,0,2,1,,5/13/200,DMONSON,GLBA,H,1680.47381,0.672189524,0,6499276.837,428033.1795,6500122.576,429490.9122,,,
2000,3,97,15,1,1,1,0,1,1,1,,5/14/200,DMONSON,GLBA,H,6196.79923,2.478719692,0,6490161.499,440245.6252,6493275.49,445605.6695,441754.1008,6490921.669,
2000,3,97,15,9,1,1,0,1,1,1,,5/14/200,DMONSON,GLBA,H,6196.79923,2.478719692,0,6490161.499,440245.6252,6493275.49,445605.6695,441113.4949,6490601.366,
2000,3,97,15,10,1,1,0,1,1,1,,5/14/200,DMONSON,GLBA,H,6196.79923,2.478719692,0,6490161.499,440245.6252,6493275.49,445605.6695,441006.7271,6490665.426,
2000,3,97,15,11,1,1,0,1,1,1,,5/14/200,DMONSON,GLBA,H,6196.79923,2.478719692,0,6490161.499,440245.6252,6493275.49,445605.6695,440814.5454,6490644.073,
2000,3,97,15,12,1,1,0,1,1,1,,5/14/200,DMONSON,GLBA,H,6196.79923,2.478719692,0,6490161.499,440245.6252,6493275.49,445605.6695,440899.9593,6490580.012,
2000,3,97,15,13,1,1,0,1,1,1,,5/14/200,DMONSON,GLBA,H,6196.79923,2.478719692,0,6490161.499,440245.6252,6493275.49,445605.6695,440964.0201,6490494.598,
2000,3,97,15,14,1,1,0,1,1,1,,5/14/200,DMONSON,GLBA,H,6196.79923,2.478719692,0,6490161.499,440245.6252,6493275.49,445605.6695,440814.5454,6490473.245,
2000,3,97,15,15,1,1,0,1,1,1,,5/14/200,DMONSON,GLBA,H,6196.79923,2.478719692,0,6490161.499,440245.6252,6493275.49,445605.6695,440707.7776,6490515.952,
2000,3,97,15,2,1,2,0,2,1,1,34,5/14/200,DMONSON,GLBA,H,6196.79923,2.478719692,0,6490161.499,440245.6252,6493275.49,445605.6695,441369.7374,6490900.315,20002034
2000,3,97,15,3,1,1,0,1,1,1,34,5/14/200,DMONSON,GLBA,H,6196.79923,2.478719692,0,6490161.499,440245.6252,6493275.49,445605.6695,441198.9088,6490878.962,20003034
2000,3,97,15,4,1,1,0,1,1,1,34,5/14/200,DMONSON,GLBA,H,6196.79923,2.478719692,0,6490161.499,440245.6252,6493275.49,445605.6695,441412.4444,6490814.901,20004034
2000,3,97,15,5,1,1,0,1,1,1,34,5/14/200,DMONSON,GLBA,H,6196.79923,2.478719692,0,6490161.499,440245.6252,6493275.49,445605.6695,441476.5052,6490793.548,20005034
2000,3,97,15,6,1,1,0,1,1,1,34,5/14/200,DMONSON,GLBA,H,6196.79923,2.478719692,0,6490161.499,440245.6252,6493275.49,445605.6695,441348.3835,6490708.134,20006034
2000,3,97,15,7,1,1,0,1,1,1,34,5/14/200,DMONSON,GLBA,H,6196.79923,2.478719692,0,6490161.499,440245.6252,6493275.49,445605.6695,441305.6774,6490793.548,20007034
2000,3,97,15,8,1,1,0,1,1,1,34,5/14/200,DMONSON,GLBA,H,6196.79923,2.478719692,0,6490161.499,440245.6252,6493275.49,445605.6695,441220.2627,6490750.841,20008034
2000,3,97,15,16,1,1,0,1,1,1,35,5/14/200,DMONSON,GLBA,H,6196.79923,2.478719692,0,6490161.499,440245.6252,6493275.49,445605.6695,440408.8281,6490366.477,20016035
2000,3,97,15,17,1,18,0,18,1,1,35,5/14/200,DMONSON,GLBA,H,6196.79923,2.478719692,0,6490161.499,440245.6252,6493275.49,445605.6695,440472.8889,6490259.709,20017035
2000,3,98,15,0,1,0,0,0,1,1,,5/14/200,DMONSON,GLBA,H,1809.25221,0.723700884,0,6489412.86,448511.422,6490320.534,450075.5415,,,
2000,1,98,3,0,1,0,0,0,1,1,,5/12/200,DMONSON,GLBA,H,409.0819,0.16363276,0,6495164.239,436097.3038,6495362.655,436449.3807,,,
2000,4,98,1,0,1,0,0,0,2,1,,5/15/200,DMONSON,GLBA,H,409.0819,0.16363276,0,6495164.239,436097.3038,6495362.655,436449.3807,,,
2000,2,98,7,0,1,0,0,0,1,1,,5/13/200,DMONSON,GLBA,H,453.46131,0.181384524,0,6498686.901,446184.4663,6498904.116,446584.3446,,,
2000,3,99,15,0,1,0,0,0,1,1,,5/14/200,DMONSON,GLBA,H,730.55599,0.292222396,0,6488991.537,433395.1365,6489351.954,434032.088,,,
2000,1,99,3,0,1,0,0,0,1,1,,5/12/200,DMONSON,GLBA,H,2904.23215,1.16169286,0,6495058.361,445523.9243,6496508.894,448033.4464,,,
2000,4,99,1,0,1,0,0,0,2,1,,5/15/200,DMONSON,GLBA,H,2904.23215,1.16169286,0,6495058.361,445523.9243,6496508.894,448033.4464,,,
2000,2,99,7,0,1,0,0,0,2,1,,5/13/200,DMONSON,GLBA,H,2588.40707,1.035362828,0,6497608.688,429939.332,6498905.475,432179.673,,,
2000,3,100,15,0,1,0,0,0,1,1,,5/14/200,DMONSON,GLBA,H,677.13299,0.270853196,0,6487318.667,449707.1154,6487663.914,450284.2997,,,
2000,1,100,3,0,1,0,0,0,2,1,,5/12/200,DMONSON,GLBA,H,2974.03285,1.18961314,0,6494685.263,430458.626,6496162.242,433032.9207,,,
2000,4,100,1,0,1,0,0,0,1,1,,5/15/200,DMONSON,GLBA,H,2974.03285,1.18961314,0,6494685.263,430458.626,6496162.242,433032.9207,,,
2000,3,101,15,0,1,0,0,0,1,1,,5/14/200,DMONSON,GLBA,H,953.43021,0.381372084,0,6484758.871,435664.6408,6485227.993,436488.3914,,,
2000,1,101,3,0,1,0,0,0,1,1,,5/12/200,DMONSON,GLBA,H,1269.85944,0.507943776,0,6494251.564,448914.3564,6494886.855,450017.6069,,,
2000,4,101,1,0,1,0,0,0,2,1,,5/15/200,DMONSON,GLBA,H,1269.85944,0.507943776,0,6494251.564,448914.3564,6494886.855,450017.6069,,,
2000,2,101,7,0,1,0,0,0,2,1,,5/13/200,DMONSON,GLBA,H,1454.47185,0.58178874,0,6497040.671,433764.7494,6497780.436,435026.5296,,,
2000,3,102,15,0,1,0,0,0,1,1,,5/14/200,DMONSON,GLBA,H,8734.07931,3.493631724,0,6484702.866,440375.9432,6489067.875,447934.3298,,,
2000,1,102,3,0,1,0,0,0,1,1,,5/12/200,DMONSON,GLBA,H,2928.86322,1.171545288,0,6493392.586,442611.9083,6494840.845,445152.6628,,,
2000,4,102,1,0,1,0,0,0,2,1,,5/15/200,DMONSON,GLBA,H,2928.86322,1.171545288,0,6493392.586,442611.9083,6494840.845,445152.6628,,,
2000,2,102,7,0,1,0,0,0,1,1,,5/13/200,DMONSON,GLBA,H,986.20981,0.394483924,0,6496337.936,446946.3094,6496846.14,447795.8165,,,
2000,3,103,15,0,1,0,0,0,1,1,,5/14/200,DMONSON,GLBA,H,866.79941,0.346719764,0,6483276.246,442696.5375,6483710.712,443451.1721,,,
2000,1,103,3,0,1,0,0,0,1,1,,5/12/200,DMONSON,GLBA,H,1149.89475,0.4599579,0,6493181.15,447068.174,6493761.671,448064.6921,,,
2000,4,103,1,0,1,0,0,0,1,1,,5/15/200,DMONSON,GLBA,H,1149.89475,0.4599579,0,6493181.15,447068.174,6493761.671,448064.6921,,,
2000,2,103,7,1,1,1,0,1,1,1,20,5/13/200,DMONSON,GLBA,H,2541.48374,1.016593496,0,6495789.528,441184.2468,6497056.203,443382.4462,442786.3973,6496580.357,20001020
2000,3,104,15,0,1,0,0,0,1,1,,5/14/200,DMONSON,GLBA,H,882.15169,0.352860676,0,6482244.986,440902.3895,6482678.964,441667.1431,,,
2000,1,104,3,0,1,0,0,0,1,1,,5/12/200,DMONSON,GLBA,H,441.98036,0.176792144,0,6492759.35,436746.3442,6492975.913,437127.9767,,,
2000,4,104,1,0,1,0,0,0,2,1,,5/15/200,DMONSON,GLBA,H,441.98036,0.176792144,0,6492759.35,436746.3442,6492975.913,437127.9767,,,
2000,2,104,7,0,1,0,0,0,1,1,,5/13/200,DMONSON,GLBA,H,425.34344,0.170137376,0,6495520.133,435899.6578,6495718.216,436271.0859,,,
2000,3,105,15,0,1,0,0,0,1,1,,5/14/200,DMONSON,GLBA,H,1410.59687,0.564238748,0,6481905.046,445136.2352,6482612.039,446351.4639,,,
2000,1,105,3,0,1,0,0,0,1,1,,5/12/200,DMONSON,GLBA,H,711.38621,0.284554484,0,6492107.932,440401.45,6492469.778,441017.8451,,,
2000,4,105,1,1,1,1,0,1,3,1,,5/15/200,DMONSON,GLBA,H,711.38621,0.284554484,0,6492107.932,440401.45,6492469.778,441017.8451,440870.0653,6492442.041,
2000,2,105,7,1,1,2,0,2,1,1,19,5/13/200,DMONSON,GLBA,H,3795.94061,1.518376244,0,6493693.335,442354.6122,6495594.867,445647.6737,443417.8515,6494405.346,20001019
2000,3,106,15,0,1,0,0,0,1,1,,5/14/200,DMONSON,GLBA,H,788.40399,0.315361596,0,6481575.892,439744.9326,6481955.16,440431.34,,,
2000,1,106,3,0,1,0,0,0,1,1,,5/12/200,DMONSON,GLBA,H,2360.94188,0.944376752,0,6490829.185,433387.6353,6492001.271,435434.5332,,,
2000,4,106,1,0,1,0,0,0,1,1,,5/15/200,DMONSON,GLBA,H,2360.94188,0.944376752,0,6490829.185,433387.6353,6492001.271,435434.5332,,,
2000,2,106,7,0,1,0,0,0,1,1,,5/13/200,DMONSON,GLBA,H,421.44027,0.168576108,0,6493151.22,436616.9605,6493367.926,436988.8709,,,
2000,3,107,15,0,1,0,0,0,1,1,,5/14/200,DMONSON,GLBA,H,535.38176,0.214152704,0,6480293.489,442331.9475,6480565.131,442793.0524,,,
2000,1,107,3,0,1,0,0,0,1,1,,5/12/200,DMONSON,GLBA,H,2205.45927,0.882183708,0,6488648.364,448782.8058,6489737.289,450698.7471,,,
2000,4,107,1,0,1,0,0,0,2,1,,5/15/200,DMONSON,GLBA,H,2205.45927,0.882183708,0,6488648.364,448782.8058,6489737.289,450698.7471,,,
2000,2,107,7,0,1,0,0,0,1,1,,5/13/200,DMONSON,GLBA,H,800.35351,0.320141404,0,6492427.235,440154.2118,6492824.977,440848.6904,,,
2000,3,108,15,0,1,0,0,0,1,1,,5/14/200,DMONSON,GLBA,H,2228.51585,0.89140634,0,6479696.752,436505.7077,6480798.245,438429.764,,,
2000,1,108,3,1,1,1,0,1,1,1,2,5/12/200,DMONSON,GLBA,H,2643.7769,1.05751076,0,6487408.647,441873.4835,6488730.279,444154.4981,442073.7252,6487612.818,20001002
2000,4,108,1,0,1,0,0,0,2,1,,5/15/200,DMONSON,GLBA,H,2643.7769,1.05751076,0,6487408.647,441873.4835,6488730.279,444154.4981,,,
2000,2,108,7,0,1,0,0,0,1,1,,5/13/200,DMONSON,GLBA,H,1023.45488,0.409381952,0,6491423.854,448014.1963,6491931.784,448903.3912,,,
2000,3,109,15,0,1,0,0,0,1,1,,5/14/200,DMONSON,GLBA,H,1623.66512,0.649466048,0,6476881.644,446029.6756,6477697.771,447432.6448,,,
2000,1,109,3,0,1,0,0,0,1,1,,5/12/200,DMONSON,GLBA,H,914.70602,0.365882408,0,6486517.768,449929.871,6486971.566,450731.8365,,,
2000,4,109,1,0,1,0,0,0,1,1,,5/15/200,DMONSON,GLBA,H,914.70602,0.365882408,0,6486517.768,449929.871,6486971.566,450731.8365,,,
2000,2,109,7,0,1,0,0,0,1,1,,5/13/200,DMONSON,GLBA,H,2183.6968,0.87347872,0,6491220.835,433277.909,6492321.212,435168.2974,,,
2000,3,110,15,0,1,0,0,0,1,1,,5/14/200,DMONSON,GLBA,H,507.72523,0.203090092,0,6475177.188,438263.6183,6475430.103,438705.8407,,,
2000,1,110,3,0,1,0,0,0,1,1,,5/12/200,DMONSON,GLBA,H,583.29729,0.233318916,0,6486452.372,435391.3979,6486740.958,435901.139,,,
2000,4,110,1,0,1,0,0,0,1,1,,5/15/200,DMONSON,GLBA,H,583.29729,0.233318916,0,6486452.372,435391.3979,6486740.958,435901.139,,,
2000,2,110,7,0,1,0,0,0,1,1,,5/13/200,DMONSON,GLBA,H,1758.45794,0.703383176,0,6489039.314,448690.8839,6489910.442,450215.833,,,
2000,3,111,15,0,1,0,0,0,1,1,,5/14/200,DMONSON,GLBA,H,1304.68222,0.521872888,0,6474224.982,446226.9564,6474877.823,447355.9321,,,
2000,1,111,3,0,1,0,0,0,1,1,,5/12/200,DMONSON,GLBA,H,4754.0229,1.90160916,0,6486189.887,430142.1813,6488568.541,434261.5383,,,
2000,4,111,1,0,1,0,0,0,1,1,,5/15/200,DMONSON,GLBA,H,4754.0229,1.90160916,0,6486189.887,430142.1813,6488568.541,434261.5383,,,
2000,2,111,7,0,1,0,0,0,1,1,,5/13/200,DMONSON,GLBA,H,455.77833,0.182311332,0,6488743.89,433769.4652,6488960.001,434161.3557,,,
2000,3,112,15,1,1,1,0,1,1,1,38,5/14/200,DMONSON,GLBA,H,542.37704,0.216950816,0,6472610.154,438632.6162,6472881.214,439104.6124,438936.655,6472842.539,20001038
2000,1,112,3,0,1,0,0,0,1,1,,5/12/200,DMONSON,GLBA,H,579.75404,0.231901616,0,6486160.616,439718.2905,6486468.468,440218.3114,,,
2000,4,112,1,0,1,0,0,0,1,1,,5/15/200,DMONSON,GLBA,H,579.75404,0.231901616,0,6486160.616,439718.2905,6486468.468,440218.3114,,,
2000,2,112,7,0,1,0,0,0,1,1,,5/13/200,DMONSON,GLBA,H,2189.71362,0.875885448,0,6487247.685,431200.0671,6488347.068,433092.939,,,
2000,3,113,15,0,1,0,0,0,2,1,,5/14/200,DMONSON,GLBA,H,850.42248,0.340168992,0,6471024.662,445471.4944,6471441.377,446208.3765,,,
2000,1,113,3,0,1,0,0,0,1,1,,5/12/200,DMONSON,GLBA,H,1004.84893,0.401939572,0,6485537.85,448217.5749,6486027.526,449088.3962,,,
2000,4,113,1,0,1,0,0,0,2,1,,5/15/200,DMONSON,GLBA,H,1004.84893,0.401939572,0,6485537.85,448217.5749,6486027.526,449088.3962,,,
2000,2,113,7,0,1,0,0,0,1,1,,5/13/200,DMONSON,GLBA,H,682.72457,0.273089828,0,6486963.859,449877.3225,6487290.329,450473.7219,,,
2000,3,114,15,8,1,1,0,1,1,1,,5/14/200,DMONSON,GLBA,H,3465.57778,1.386231112,0,6469067.844,437289.7363,6470802.904,440291.2089,439245.9758,6470177.617,
2000,3,114,15,9,1,1,0,1,1,1,,5/14/200,DMONSON,GLBA,H,3465.57778,1.386231112,0,6469067.844,437289.7363,6470802.904,440291.2089,439150.8003,6470130.029,
2000,3,114,15,10,1,1,0,1,1,1,,5/14/200,DMONSON,GLBA,H,3465.57778,1.386231112,0,6469067.844,437289.7363,6470802.904,440291.2089,439008.0361,6470177.617,
2000,3,114,15,11,1,1,0,1,1,1,,5/14/200,DMONSON,GLBA,H,3465.57778,1.386231112,0,6469067.844,437289.7363,6470802.904,440291.2089,438389.3945,6469701.738,
2000,3,114,15,12,1,1,1,2,1,1,,5/14/200,DMONSON,GLBA,H,3465.57778,1.386231112,0,6469067.844,437289.7363,6470802.904,440291.2089,437984.8972,6469463.799,
2000,3,114,15,13,1,1,0,1,1,1,,5/14/200,DMONSON,GLBA,H,3465.57778,1.386231112,0,6469067.844,437289.7363,6470802.904,440291.2089,437675.5759,6469297.241,
2000,3,114,15,14,1,1,0,1,1,1,,5/14/200,DMONSON,GLBA,H,3465.57778,1.386231112,0,6469067.844,437289.7363,6470802.904,440291.2089,437485.224,6469202.066,
2000,3,114,15,15,1,1,0,1,1,1,,5/14/200,DMONSON,GLBA,H,3465.57778,1.386231112,0,6469067.844,437289.7363,6470802.904,440291.2089,437318.6664,6469178.271,
2000,3,114,15,1,1,1,0,1,1,1,39,5/14/200,DMONSON,GLBA,H,3465.57778,1.386231112,0,6469067.844,437289.7363,6470802.904,440291.2089,439436.3277,6470272.793,20001039
2000,3,114,15,2,1,1,0,1,1,1,39,5/14/200,DMONSON,GLBA,H,3465.57778,1.386231112,0,6469067.844,437289.7363,6470802.904,440291.2089,439483.9155,6470415.557,20002039
2000,3,114,15,3,1,1,0,1,1,1,39,5/14/200,DMONSON,GLBA,H,3465.57778,1.386231112,0,6469067.844,437289.7363,6470802.904,440291.2089,439555.2967,6470415.557,20003039
2000,3,114,15,4,1,1,0,1,1,1,39,5/14/200,DMONSON,GLBA,H,3465.57778,1.386231112,0,6469067.844,437289.7363,6470802.904,440291.2089,439507.7098,6470510.732,20004039
2000,3,114,15,5,1,1,0,1,1,1,39,5/14/200,DMONSON,GLBA,H,3465.57778,1.386231112,0,6469067.844,437289.7363,6470802.904,440291.2089,439626.6787,6470510.732,20005039
2000,3,114,15,6,1,1,0,1,1,1,39,5/14/200,DMONSON,GLBA,H,3465.57778,1.386231112,0,6469067.844,437289.7363,6470802.904,440291.2089,439555.2967,6470225.205,20006039
2000,3,114,15,7,1,1,0,1,1,1,39,5/14/200,DMONSON,GLBA,H,3465.57778,1.386231112,0,6469067.844,437289.7363,6470802.904,440291.2089,439650.4731,6470296.587,20007039
2000,1,114,3,0,1,0,0,0,1,1,,5/12/200,DMONSON,GLBA,H,850.99632,0.340398528,0,6483812.705,435639.379,6484246.132,436375.2934,,,
2000,4,114,1,0,1,0,0,0,1,1,,5/15/200,DMONSON,GLBA,H,850.99632,0.340398528,0,6483812.705,435639.379,6484246.132,436375.2934,,,
2000,2,114,7,0,1,0,0,0,1,1,,5/13/200,DMONSON,GLBA,H,4952.58102,1.981032408,0,6486751.56,439911.8949,6489212.178,444200.1969,,,
2000,3,115,15,0,1,0,0,0,3,1,,5/14/200,DMONSON,GLBA,H,5986.95207,2.394780828,0,6468530.831,445973.4829,6471525.246,451161.3386,,,
2000,2,115,7,0,1,0,0,0,1,1,,5/13/200,DMONSON,GLBA,H,669.40603,0.267762412,0,6486627.253,434918.4249,6486970.323,435497.0541,,,
2000,1,115,3,0,1,0,0,0,1,1,,5/12/200,DMONSON,GLBA,H,9427.13133,3.770852532,0,6483286.744,439528.2471,6488013.158,447697.028,,,
2000,4,115,1,0,1,0,0,0,2,1,,5/15/200,DMONSON,GLBA,H,9427.13133,3.770852532,0,6483286.744,439528.2471,6488013.158,447697.028,,,
2000,3,116,15,0,1,0,0,0,1,1,,5/14/200,DMONSON,GLBA,H,1067.76717,0.427106868,0,6468273.245,435920.8935,6468815.087,436846.7193,,,
2000,1,116,3,0,1,0,0,0,1,1,,5/12/200,DMONSON,GLBA,H,460.43919,0.184175676,0,6483181.393,444123.8746,6483398.401,444525.4316,,,
2000,4,116,1,0,1,0,0,0,1,1,,5/15/200,DMONSON,GLBA,H,460.43919,0.184175676,0,6483181.393,444123.8746,6483398.401,444525.4316,,,
2000,2,116,7,0,1,0,0,0,1,1,,5/13/200,DMONSON,GLBA,H,1506.9793,0.60279172,0,6486275.772,429492.9538,6487013.487,430797.8029,,,
2000,3,117,15,1,1,1,0,1,1,1,,5/14/200,DMONSON,GLBA,H,1717.49126,0.686996504,0,6467729.714,439785.9714,6468598.127,441272.3396,441101.9036,6468488.247,
2000,3,117,15,2,1,1,0,1,1,1,40,5/14/200,DMONSON,GLBA,H,1717.49126,0.686996504,0,6467729.714,439785.9714,6468598.127,441272.3396,440840.1696,6468226.514,20002040
2000,3,117,15,3,1,1,0,1,1,1,40,5/14/200,DMONSON,GLBA,H,1717.49126,0.686996504,0,6467729.714,439785.9714,6468598.127,441272.3396,440697.4073,6468155.132,20003040
2000,1,117,3,0,1,0,0,0,1,1,,5/12/200,DMONSON,GLBA,H,575.8041,0.23032164,0,6482826.628,448337.2345,6483117.021,448836.7295,,,
2000,4,117,1,0,1,0,0,0,1,1,,5/15/200,DMONSON,GLBA,H,575.8041,0.23032164,0,6482826.628,448337.2345,6483117.021,448836.7295,,,
2000,2,117,7,0,1,0,0,0,1,1,,5/13/200,DMONSON,GLBA,H,1213.79391,0.485517564,0,6485965.281,448174.6691,6486582.567,449221.8492,,,
2000,1,118,3,0,1,0,0,0,1,1,,5/12/200,DMONSON,GLBA,H,485.01766,0.194007064,0,6482065.06,446995.3312,6482300.657,447416.5233,,,
2000,4,118,1,0,1,0,0,0,1,1,,5/15/200,DMONSON,GLBA,H,485.01766,0.194007064,0,6482065.06,446995.3312,6482300.657,447416.5233,,,
2000,2,118,7,0,1,0,0,0,1,1,,5/13/200,DMONSON,GLBA,H,1110.7804,0.44431216,0,6485707.734,433310.07,6486266.854,434271.4151,,,
2000,3,119,15,0,1,0,0,0,2,1,,5/14/200,DMONSON,GLBA,H,678.46475,0.2713859,0,6466230.767,441969.1442,6466556.327,442549.8062,,,
2000,1,119,3,1,1,1,0,1,1,1,10,5/12/200,DMONSON,GLBA,H,917.64131,0.367056524,0,6481624.623,436653.597,6482094.42,437448.709,436926.0656,6481734.156,20001010
2000,4,119,1,1,1,1,0,1,1,1,,5/15/200,DMONSON,GLBA,H,917.64131,0.367056524,0,6481624.623,436653.597,6482094.42,437448.709,437265.2821,6482127.366,
2000,2,119,7,0,1,0,0,0,1,1,,5/13/200,DMONSON,GLBA,H,1656.85643,0.662742572,0,6484550.949,445717.3481,6485384.99,447156.793,,,
2000,3,120,15,0,1,0,0,0,2,1,,5/14/200,DMONSON,GLBA,H,1755.66661,0.702266644,0,6466146.161,446643.5788,6467035.195,448168.241,,,
2000,1,120,3,0,1,0,0,0,1,1,,5/12/200,DMONSON,GLBA,H,636.14359,0.254457436,0,6481176.353,445485.826,6481502.826,446034.8628,,,
2000,4,120,1,0,1,0,0,0,1,1,,5/15/200,DMONSON,GLBA,H,636.14359,0.254457436,0,6481176.353,445485.826,6481502.826,446034.8628,,,
2000,2,120,7,0,1,0,0,0,1,1,,5/13/200,DMONSON,GLBA,H,827.97339,0.331189356,0,6484258.514,435617.5518,6484673.696,436333.6583,,,
2000,2,121,7,0,1,0,0,0,1,1,,5/13/200,DMONSON,GLBA,H,2054.72183,0.821888732,0,6479232.555,436517.654,6480262.124,438294.897,,,
2000,1,121,3,0,1,0,0,0,1,1,,5/12/200,DMONSON,GLBA,H,1923.30754,0.769323016,0,6480918.711,440240.539,6481896.018,441898.5527,,,
2000,4,121,1,0,1,0,0,0,1,1,,5/15/200,DMONSON,GLBA,H,1923.30754,0.769323016,0,6480918.711,440240.539,6481896.018,441898.5527,,,
2000,1,122,3,0,1,0,0,0,1,1,,5/12/200,DMONSON,GLBA,H,777.81581,0.311126324,0,6479745.851,442975.6576,6480125.823,443652.3298,,,
2000,4,122,1,0,1,0,0,0,1,1,,5/15/200,DMONSON,GLBA,H,777.81581,0.311126324,0,6479745.851,442975.6576,6480125.823,443652.3298,,,
2000,2,122,7,0,1,0,0,0,3,1,,5/13/200,DMONSON,GLBA,H,4210.96522,1.684386088,0,6478675.941,445120.2389,6480760.926,448767.0691,,,
2000,2,123,7,0,1,0,0,0,3,1,,5/13/200,DMONSON,GLBA,H,1832.52534,0.733010136,0,6476399.464,446003.5775,6477324.445,447593.1134,,,
2000,1,123,3,0,1,0,0,0,1,1,,5/12/200,DMONSON,GLBA,H,1878.28782,0.751315128,0,6478822.765,436608.3306,6479762.046,438228.6611,,,
2000,4,123,1,0,1,0,0,0,1,1,,5/15/200,DMONSON,GLBA,H,1878.28782,0.751315128,0,6478822.765,436608.3306,6479762.046,438228.6611,,,
2000,2,124,7,1,1,1,0,1,1,1,,5/13/200,DMONSON,GLBA,H,749.34834,0.299739336,0,6474604.732,438079.2874,6474965.765,438727.8169,438531.9478,6474946.313,
2000,1,124,3,0,1,0,0,0,1,1,,5/12/200,DMONSON,GLBA,H,452.61711,0.181046844,0,6476834.287,437929.4464,6477050.817,438322.2636,,,
2000,4,124,1,0,1,0,0,0,1,1,,5/15/200,DMONSON,GLBA,H,452.61711,0.181046844,0,6476834.287,437929.4464,6477050.817,438322.2636,,,
2000,2,125,7,0,1,0,0,0,3,1,,5/13/200,DMONSON,GLBA,H,915.78317,0.366313268,0,6473761.224,446210.8701,6474214.4,447006.1056,,,
2000,1,125,3,0,1,0,0,0,1,1,,5/12/200,DMONSON,GLBA,H,1243.93662,0.497574648,0,6475972.016,446046.3851,6476588.347,447125.733,,,
2000,4,125,1,0,1,0,0,0,2,1,,5/15/200,DMONSON,GLBA,H,1243.93662,0.497574648,0,6475972.016,446046.3851,6476588.347,447125.733,,,
2000,2,126,7,0,1,0,0,0,1,1,,5/13/200,DMONSON,GLBA,H,400.78467,0.160313868,0,6472308.871,438910.5658,6472507.698,439254.7652,,,
2000,1,126,3,0,1,0,0,0,1,1,,5/12/200,DMONSON,GLBA,H,978.62435,0.39144974,0,6474104.661,438012.9557,6474592.534,438858.3704,,,
2000,4,126,1,1,1,1,0,1,1,1,,5/15/200,DMONSON,GLBA,H,978.62435,0.39144974,0,6474104.661,438012.9557,6474592.534,438858.3704,438710.7646,6474453.818,
2000,2,127,7,1,1,1,0,1,1,1,,5/13/200,DMONSON,GLBA,H,2619.72058,1.047888232,0,6469073.439,438109.2179,6470393.209,440382.5042,438401.6251,6469342.398,
2000,2,127,7,2,1,1,0,1,1,1,,5/13/200,DMONSON,GLBA,H,2619.72058,1.047888232,0,6469073.439,438109.2179,6470393.209,440382.5042,438584.0776,6469342.398,
2000,1,127,3,0,1,0,0,0,1,1,,5/12/200,DMONSON,GLBA,H,889.05153,0.355620612,0,6473278.912,446194.5273,6473732.479,446960.6388,,,
2000,4,127,1,0,1,0,0,0,3,1,,5/15/200,DMONSON,GLBA,H,889.05153,0.355620612,0,6473278.912,446194.5273,6473732.479,446960.6388,,,
2000,2,128,7,0,1,0,0,0,1,1,,5/13/200,DMONSON,GLBA,H,1662.33574,0.664934296,0,6467482.996,440143.2616,6468315.156,441580.3188,,,
2000,1,128,3,0,1,0,0,0,1,1,,5/12/200,DMONSON,GLBA,H,400.16408,0.160065632,0,6471971.251,439139.2592,6472170.098,439483.4755,,,
2000,4,128,1,0,1,0,0,0,2,1,,5/15/200,DMONSON,GLBA,H,400.16408,0.160065632,0,6471971.251,439139.2592,6472170.098,439483.4755,,,
2000,1,129,3,0,1,0,0,0,1,1,,5/12/200,DMONSON,GLBA,H,856.83787,0.342735148,0,6470179.822,450413.3251,6470597.46,451149.822,,,
2000,4,129,1,0,1,0,0,0,1,1,,5/15/200,DMONSON,GLBA,H,856.83787,0.342735148,0,6470179.822,450413.3251,6470597.46,451149.822,,,
2000,2,130,7,0,1,0,0,0,2,1,,5/13/200,DMONSON,GLBA,H,894.29188,0.357716752,0,6466135.67,447424.3284,6466589.35,448201.4159,,,
2000,1,130,3,1,1,1,0,1,1,1,14,5/12/200,DMONSON,GLBA,H,2846.07598,1.138430392,0,6470133.053,445527.3988,6471547.286,447993.6603,446150.4915,6470629.093,20001014
2000,4,130,1,0,1,0,0,0,2,1,,5/15/200,DMONSON,GLBA,H,2846.07598,1.138430392,0,6470133.053,445527.3988,6471547.286,447993.6603,,,
2000,1,131,3,0,1,0,0,0,1,1,,5/12/200,DMONSON,GLBA,H,2806.04723,1.122418892,0,6467730.009,446177.158,6469126.604,448605.4057,,,
2000,4,131,1,0,1,0,0,0,2,1,,5/15/200,DMONSON,GLBA,H,2806.04723,1.122418892,0,6467730.009,446177.158,6469126.604,448605.4057,,,
2000,1,132,3,0,1,0,0,0,1,1,,5/12/200,DMONSON,GLBA,H,1459.7842,0.58391368,0,6467199.79,440461.0086,6467923.327,441720.8647,,,
2000,4,132,1,0,1,0,0,0,3,1,,5/15/200,DMONSON,GLBA,H,1459.7842,0.58391368,0,6467199.79,440461.0086,6467923.327,441720.8647,,,
2000,3,136,15,0,1,0,0,0,1,1,,5/14/200,DMONSON,GLBA,H,4802.65686,1.921062744,0,6508473.334,438333.7249,6510859.499,442492.4969,,,
2000,3,137,15,0,1,0,0,0,1,1,,5/14/200,DMONSON,GLBA,H,1906.37413,0.762549652,0,6507714.129,441827.7479,6508654.822,443483.3637,,,
2000,3,139,15,0,1,0,0,0,1,1,,5/14/200,DMONSON,GLBA,H,6898.87214,2.759548856,0,6500465.003,438883.9838,6503920.837,444854.9669,,,
2000,3,140,15,0,1,0,0,0,1,1,,5/14/200,DMONSON,GLBA,H,2594.25423,1.037701692,0,6497946.868,429712.9965,6499243.525,431953.2264,,,
2000,3,141,15,0,1,0,0,0,1,1,,5/14/200,DMONSON,GLBA,H,3555.99876,1.422399504,0,6493976.266,442048.6284,6495769.195,445126.9601,,,
2000,3,142,15,0,1,0,0,0,1,1,,5/14/200,DMONSON,GLBA,H,1474.84302,0.589937208,0,6491325.671,447033.3238,6492050.902,448313.4449,,,
2000,3,143,15,2,1,1,1,2,1,1,36,5/14/200,DMONSON,GLBA,H,6171.92974,2.468771896,0,6487739.663,440839.6362,6490836.053,446192.4891,442194.5944,6488514.513,20002036
2000,3,143,15,1,1,1,0,1,1,1,,5/14/200,DMONSON,GLBA,H,6171.92974,2.468771896,0,6487739.663,440839.6362,6490836.053,446192.4891,442965.7622,6488875.998,
2000,3,143,15,3,1,1,1,2,1,1,36,5/14/200,DMONSON,GLBA,H,6171.92974,2.468771896,0,6487739.663,440839.6362,6490836.053,446192.4891,442098.1987,6488418.117,20003036
2000,3,143,15,4,1,1,1,2,1,1,36,5/14/200,DMONSON,GLBA,H,6171.92974,2.468771896,0,6487739.663,440839.6362,6490836.053,446192.4891,442001.802,6488538.612,20004036
2000,3,143,15,5,1,1,1,2,1,1,36,5/14/200,DMONSON,GLBA,H,6171.92974,2.468771896,0,6487739.663,440839.6362,6490836.053,446192.4891,442098.1987,6488610.909,20005036
2000,3,143,15,6,1,1,0,1,1,1,36,5/14/200,DMONSON,GLBA,H,6171.92974,2.468771896,0,6487739.663,440839.6362,6490836.053,446192.4891,442242.7923,6488635.008,20006036
2000,3,143,15,7,1,1,0,1,1,1,36,5/14/200,DMONSON,GLBA,H,6171.92974,2.468771896,0,6487739.663,440839.6362,6490836.053,446192.4891,442290.9906,6488538.612,20007036
2000,3,143,15,8,1,1,0,1,1,1,36,5/14/200,DMONSON,GLBA,H,6171.92974,2.468771896,0,6487739.663,440839.6362,6490836.053,446192.4891,442339.189,6488442.216,20008036
2000,3,143,15,9,1,1,0,1,1,1,36,5/14/200,DMONSON,GLBA,H,6171.92974,2.468771896,0,6487739.663,440839.6362,6490836.053,446192.4891,442266.8917,6488418.117,20009036
2000,3,143,15,10,1,1,0,1,1,1,36,5/14/200,DMONSON,GLBA,H,6171.92974,2.468771896,0,6487739.663,440839.6362,6490836.053,446192.4891,442194.5944,6488369.919,20010036
2000,3,143,15,11,1,1,0,1,1,1,36,5/14/200,DMONSON,GLBA,H,6171.92974,2.468771896,0,6487739.663,440839.6362,6490836.053,446192.4891,442087.5005,6488518.905,20011036
2000,1,143,3,0,1,0,0,0,1,1,,5/12/200,DMONSON,GLBA,H,1267.47702,0.506990808,0,6509551.49,441835.9576,6510184.775,442936.1526,,,
2000,4,143,1,0,1,0,0,0,1,1,,5/15/200,DMONSON,GLBA,H,1267.47702,0.506990808,0,6509551.49,441835.9576,6510184.775,442936.1526,,,
2000,3,144,15,0,1,0,0,0,1,1,,5/14/200,DMONSON,GLBA,H,1208.42626,0.483370504,0,6486550.251,433975.1114,6487145.192,435024.1401,,,
2000,1,144,3,0,1,0,0,0,1,1,,5/12/200,DMONSON,GLBA,H,1313.38039,0.525352156,0,6508502.691,440014.4637,6509171.99,441154.4309,,,
2000,4,144,1,0,1,0,0,0,1,1,,5/15/200,DMONSON,GLBA,H,1313.38039,0.525352156,0,6508502.691,440014.4637,6509171.99,441154.4309,,,
2000,3,145,15,0,1,0,0,0,1,1,,5/14/200,DMONSON,GLBA,H,687.39452,0.274957808,0,6486045.707,433082.7142,6486388.178,433681.0128,,,
2000,1,145,3,0,1,0,0,0,1,1,,5/12/200,DMONSON,GLBA,H,1909.74811,0.763899244,0,6504039.227,427463.6751,6504992.551,429115.1015,,,
2000,4,145,1,0,1,0,0,0,1,1,,5/15/200,DMONSON,GLBA,H,1909.74811,0.763899244,0,6504039.227,427463.6751,6504992.551,429115.1015,,,
2000,3,146,15,0,1,0,0,0,1,1,,5/14/200,DMONSON,GLBA,H,5398.23619,2.159294476,0,6485965.791,428166.3055,6488666.833,432846.0382,,,
2000,1,146,3,1,1,1,0,1,1,1,6,5/12/200,DMONSON,GLBA,H,4042.24524,1.616898096,0,6501092.181,441554.4655,6503101.351,445056.0814,441830.9751,6501112.189,20001006
2000,4,146,1,0,1,0,0,0,1,1,,5/15/200,DMONSON,GLBA,H,4042.24524,1.616898096,0,6501092.181,441554.4655,6503101.351,445056.0814,,,
2000,3,147,15,0,1,0,0,0,1,1,,5/14/200,DMONSON,GLBA,H,6489.1332,2.59565328,0,6483982.484,443911.8036,6487228.137,449531.1955,,,
2000,1,147,3,0,1,0,0,0,1,1,,5/12/200,DMONSON,GLBA,H,781.1414,0.31245656,0,6499898.507,439504.1711,6500296.427,440178.0684,,,
2000,4,147,1,0,1,0,0,0,2,1,,5/15/200,DMONSON,GLBA,H,781.1414,0.31245656,0,6499898.507,439504.1711,6500296.427,440178.0684,,,
2000,2,147,7,0,1,0,0,0,1,1,,5/13/200,DMONSON,GLBA,H,2722.40193,1.088960772,0,6508659.679,439466.4796,6510015.687,441823.6069,,,
2000,3,148,15,0,1,0,0,0,1,1,,5/14/200,DMONSON,GLBA,H,1799.4912,0.71979648,0,6483083.402,447174.3277,6483990.675,448731.5364,,,
2000,1,148,3,0,1,0,0,0,1,1,,5/12/200,DMONSON,GLBA,H,2675.50803,1.070203212,0,6498975.134,428289.0075,6500306.704,430607.2157,,,
2000,4,148,1,0,1,0,0,0,2,1,,5/15/200,DMONSON,GLBA,H,2675.50803,1.070203212,0,6498975.134,428289.0075,6500306.704,430607.2157,,,
2000,3,149,15,1,1,1,0,1,1,1,28,5/14/200,DMONSON,GLBA,H,1862.22917,0.744891668,0,6482101.627,435854.3343,6483022.037,437473.2328,437306.0511,6482355.306,20001028
2000,2,149,7,0,1,0,0,0,1,1,,5/13/200,DMONSON,GLBA,H,4297.63477,1.719053908,0,6501393.298,441278.434,6503528.965,445004.1085,,,
2000,3,150,15,0,1,0,0,0,1,1,,5/14/200,DMONSON,GLBA,H,1093.06441,0.437225764,0,6481588.239,449370.963,6482132.854,450320.9623,,,
2000,2,150,7,0,1,0,0,0,1,1,,5/13/200,DMONSON,GLBA,H,5831.60905,2.33264362,0,6493482.133,446771.7602,6496404.608,451819.2378,,,
2000,1,150,3,0,1,0,0,0,1,1,,5/12/200,DMONSON,GLBA,H,1209.93792,0.483975168,0,6496847.411,434216.717,6497460.802,435273.0002,,,
2000,4,150,1,0,1,0,0,0,2,1,,5/15/200,DMONSON,GLBA,H,1209.93792,0.483975168,0,6496847.411,434216.717,6497460.802,435273.0002,,,
2000,3,151,15,0,1,0,0,0,1,1,,5/14/200,DMONSON,GLBA,H,3743.74769,1.497499076,0,6478922.215,444763.6865,6480789.464,448008.9124,,,
2000,2,151,7,0,1,0,0,0,1,1,,5/13/200,DMONSON,GLBA,H,4919.218,1.9676872,0,6494339.092,429066.381,6496806.709,433334.5769,,,
2000,1,151,3,0,1,0,0,0,1,1,,5/12/200,DMONSON,GLBA,H,2709.36628,1.083746512,0,6495470.143,441441.0321,6496827.646,443785.912,,,
2000,4,151,1,0,1,0,0,0,2,1,,5/15/200,DMONSON,GLBA,H,2709.36628,1.083746512,0,6495470.143,441441.0321,6496827.646,443785.912,,,
2000,3,152,15,0,1,0,0,0,1,1,,5/14/200,DMONSON,GLBA,H,893.47451,0.357389804,0,6477653.65,437757.4628,6478105.421,438533.4744,,,
2000,2,152,7,0,1,0,0,0,1,1,,5/13/200,DMONSON,GLBA,H,3648.91236,1.459564944,0,6492527.327,430730.4886,6494347.154,433893.4646,,,
2000,1,152,3,0,1,0,0,0,1,1,,5/12/200,DMONSON,GLBA,H,1032.52044,0.413008176,0,6493893.237,429087.3601,6494396.865,429978.5473,,,
2000,4,152,1,0,1,0,0,0,1,1,,5/15/200,DMONSON,GLBA,H,1032.52044,0.413008176,0,6493893.237,429087.3601,6494396.865,429978.5473,,,
2000,2,153,7,0,1,0,0,0,1,1,,5/13/200,DMONSON,GLBA,H,1441.20159,0.576480636,0,6492032.268,444269.54,6492757.136,445511.1906,,,
2000,1,153,3,0,1,0,0,0,1,1,,5/12/200,DMONSON,GLBA,H,3633.79104,1.453516416,0,6492225.293,431016.0708,6494045.678,434159.7663,,,
2000,4,153,1,0,1,0,0,0,1,1,,5/15/200,DMONSON,GLBA,H,3633.79104,1.453516416,0,6492225.293,431016.0708,6494045.678,434159.7663,,,
2000,2,154,7,0,1,0,0,0,1,1,,5/13/200,DMONSON,GLBA,H,691.09791,0.276439164,0,6490338.088,431729.8429,6490680.349,432327.6243,,,
2000,1,154,3,0,1,0,0,0,1,1,,5/12/200,DMONSON,GLBA,H,2311.06833,0.924427332,0,6491568.368,444262.9214,6492728.104,446267.021,,,
2000,4,154,1,0,1,0,0,0,2,1,,5/15/200,DMONSON,GLBA,H,2311.06833,0.924427332,0,6491568.368,444262.9214,6492728.104,446267.021,,,
2000,1,155,3,0,1,0,0,0,1,1,,5/12/200,DMONSON,GLBA,H,1270.09811,0.508039244,0,6489747.71,431525.4503,6490378.101,432632.8667,,,
2000,4,155,1,0,1,0,0,0,1,1,,5/15/200,DMONSON,GLBA,H,1270.09811,0.508039244,0,6489747.71,431525.4503,6490378.101,432632.8667,,,
2000,2,155,7,1,1,1,0,1,1,1,17,5/13/200,DMONSON,GLBA,H,3702.62203,1.481048812,0,6489752.088,440316.9923,6491597.508,443526.2663,441005.2076,6490306.921,20001017
2000,2,155,7,2,1,1,0,1,1,1,17,5/13/200,DMONSON,GLBA,H,3702.62203,1.481048812,0,6489752.088,440316.9923,6491597.508,443526.2663,441053.4625,6490194.326,20002017
2000,2,155,7,3,1,1,0,1,1,1,17,5/13/200,DMONSON,GLBA,H,3702.62203,1.481048812,0,6489752.088,440316.9923,6491597.508,443526.2663,441166.0575,6490194.326,20003017
2000,2,155,7,4,1,2,0,2,1,1,17,5/13/200,DMONSON,GLBA,H,3702.62203,1.481048812,0,6489752.088,440316.9923,6491597.508,443526.2663,441005.2076,6490081.731,20004017
2000,2,155,7,5,1,1,0,1,1,1,,5/13/200,DMONSON,GLBA,H,3702.62203,1.481048812,0,6489752.088,440316.9923,6491597.508,443526.2663,441471.6726,6490339.091,
2000,2,156,7,0,1,0,0,0,1,1,,5/13/200,DMONSON,GLBA,H,3451.22538,1.380490152,0,6489466.168,444611.3705,6491188.064,447603.7011,,,
2000,1,156,3,1,1,1,0,1,1,1,3,5/12/200,DMONSON,GLBA,H,3869.5128,1.54780512,0,6489432.944,440554.7188,6491350.832,443900.9586,441395.2558,6489877.222,20001003
2000,1,156,3,2,1,1,0,1,1,1,3,5/12/200,DMONSON,GLBA,H,3869.5128,1.54780512,0,6489432.944,440554.7188,6491350.832,443900.9586,441351.0134,6489936.212,20002003
2000,1,156,3,3,1,1,0,1,1,1,3,5/12/200,DMONSON,GLBA,H,3869.5128,1.54780512,0,6489432.944,440554.7188,6491350.832,443900.9586,441292.0236,6489995.202,20003003
2000,4,156,1,0,1,0,0,0,2,1,,5/15/200,DMONSON,GLBA,H,3869.5128,1.54780512,0,6489432.944,440554.7188,6491350.832,443900.9586,,,
2000,2,157,7,1,1,1,0,1,1,1,16,5/13/200,DMONSON,GLBA,H,8887.72021,3.555088084,0,6484021.946,439996.315,6488477.189,447693.5275,440892.6123,6484661.085,20001016
2000,2,157,7,2,1,1,0,1,1,1,,5/13/200,DMONSON,GLBA,H,8887.72021,3.555088084,0,6484021.946,439996.315,6488477.189,447693.5275,444656.503,6486623.456,
2000,1,157,3,0,1,0,0,0,1,1,,5/12/200,DMONSON,GLBA,H,4224.08493,1.689633972,0,6489328.344,445172.2411,6491431.783,448819.2641,,,
2000,4,157,1,0,1,0,0,0,1,1,,5/15/200,DMONSON,GLBA,H,4224.08493,1.689633972,0,6489328.344,445172.2411,6491431.783,448819.2641,,,
2000,2,158,7,0,1,0,0,0,1,1,,5/13/200,DMONSON,GLBA,H,2564.11366,1.025645464,0,6482166.3,446374.5267,6483454.207,448598.1795,,,
2000,1,158,3,0,1,0,0,0,1,1,,5/12/200,DMONSON,GLBA,H,1846.98872,0.738795488,0,6484032.598,445622.7115,6484957.287,447219.0216,,,
2000,4,158,1,0,1,0,0,0,2,1,,5/15/200,DMONSON,GLBA,H,1846.98872,0.738795488,0,6484032.598,445622.7115,6484957.287,447219.0216,,,
2000,1,159,3,0,1,0,0,0,1,1,,5/12/200,DMONSON,GLBA,H,5117.89823,2.047159292,0,6478320.396,445329.3516,6480877.987,449760.4924,,,
2000,2,159,7,0,1,0,0,0,1,1,,5/13/200,DMONSON,GLBA,H,1550.68788,0.620275152,0,6481782.058,436101.9118,6482558.462,437446.3928,,,
2000,1,160,3,0,1,0,0,0,1,1,,5/12/200,DMONSON,GLBA,H,1953.51997,0.781407988,0,6468862.458,438544.883,6469838.621,440237.5686,,,
2000,4,160,1,0,1,0,0,0,3,1,,5/15/200,DMONSON,GLBA,H,1953.51997,0.781407988,0,6468862.458,438544.883,6469838.621,440237.5686,,,
2000,2,160,7,0,1,0,0,0,2,1,,5/13/200,DMONSON,GLBA,H,1013.66328,0.405465312,0,6481305.521,449707.6298,6481814.086,450579.4173,,,
2000,2,161,7,0,1,0,0,0,1,1,,5/13/200,DMONSON,GLBA,H,2163.38675,0.8653547,0,6481256.274,440012.3008,6482341.642,441885.715,,,
2000,2,162,7,0,1,0,0,0,1,1,,5/13/200,DMONSON,GLBA,H,3676.75221,1.470700884,0,6479956.064,442560.4414,6481803.744,445747.3323,,,
2000,2,163,7,0,1,0,0,0,1,1,,5/13/200,DMONSON,GLBA,H,1008.34949,0.403339796,0,6477279.769,437926.7533,6477785.723,438800.992,,,
2000,2,164,7,0,1,0,0,0,3,1,,5/13/200,DMONSON,GLBA,H,1559.63129,0.623852516,0,6470433.456,445278.0398,6471213.002,446624.4444,,,
2000,2,165,7,2,1,1,0,1,3,1,,5/13/200,DMONSON,GLBA,H,5852.79461,2.341117844,0,6468139.563,446085.1908,6471061.354,451155.5802,446879.5628,6468679.209,
2000,2,165,7,1,1,1,0,1,3,1,25,5/13/200,DMONSON,GLBA,H,5852.79461,2.341117844,0,6468139.563,446085.1908,6471061.354,451155.5802,447366.4244,6468980.599,20001025
2000,3,223,15,0,1,0,0,0,1,1,,5/14/200,DMONSON,GLBA,H,1850.55044,0.740220176,0,6510967.1,440284.1466,6511889.445,441880.6383,,,
2000,3,226,15,0,1,0,0,0,1,1,,5/14/200,DMONSON,GLBA,H,981.01902,0.392407608,0,6509286.655,442169.8983,6509775.259,443017.0108,,,
2000,3,227,15,0,1,0,0,0,1,1,,5/14/200,DMONSON,GLBA,H,402.79278,0.161117112,0,6508563.446,440894.1412,6508762.29,441244.7808,,,
2000,3,230,15,0,1,0,0,0,1,1,,5/14/200,DMONSON,GLBA,H,632.83602,0.253134408,0,6506779.587,433012.4094,6507085.75,433558.6935,,,
2000,1,231,3,0,1,0,0,0,1,1,,5/12/200,DMONSON,GLBA,H,432.38761,0.172955044,0,6512805.213,440244.9162,6513022.259,440614.7862,,,
2000,4,231,1,0,1,0,0,0,1,1,,5/15/200,DMONSON,GLBA,H,432.38761,0.172955044,0,6512805.213,440244.9162,6513022.259,440614.7862,,,
2000,3,233,15,0,1,0,0,0,1,1,,5/14/200,DMONSON,GLBA,H,433.34872,0.173339488,0,6504474.23,429037.9782,6504690.213,429409.2733,,,
2000,3,234,15,0,1,0,0,0,1,1,,5/14/200,DMONSON,GLBA,H,1482.62586,0.593050344,0,6504407.258,443295.8931,6505131.119,444582.1872,,,
2000,3,236,15,0,1,0,0,0,1,1,,5/14/200,DMONSON,GLBA,H,990.88584,0.396354336,0,6503954.128,437730.232,6504460.173,438589.0187,,,
2000,2,236,7,0,1,0,0,0,1,1,,5/13/200,DMONSON,GLBA,H,401.67667,0.160670668,0,6513142.502,440037.9218,6513341.268,440388.2021,,,
2000,3,237,15,0,1,0,0,0,1,1,,5/14/200,DMONSON,GLBA,H,584.57645,0.23383058,0,6503485.27,427308.289,6503772.798,427816.484,,,
2000,1,237,3,0,1,0,0,0,1,1,,5/12/200,DMONSON,GLBA,H,1192.24307,0.476897228,0,6507924.779,441396.2945,6508521.829,442428.886,,,
2000,4,237,1,0,1,0,0,0,1,1,,5/15/200,DMONSON,GLBA,H,1192.24307,0.476897228,0,6507924.779,441396.2945,6508521.829,442428.886,,,
2000,3,238,15,0,1,0,0,0,1,1,,5/14/200,DMONSON,GLBA,H,698.23851,0.279295404,0,6503266.883,441345.3736,6503629.016,441950.2881,,,
2000,3,239,15,0,1,0,0,0,1,1,,5/14/200,DMONSON,GLBA,H,534.15172,0.213660688,0,6502532.338,425675.1167,6502801.832,426144.5319,,,
2000,3,240,15,0,1,0,0,0,1,1,,5/14/200,DMONSON,GLBA,H,417.10416,0.166841664,0,6501978.299,429514.834,6502194.503,429876.6632,,,
2000,3,241,15,0,1,0,0,0,1,1,,5/14/200,DMONSON,GLBA,H,4096.41696,1.638566784,0,6500645.964,441605.824,6502691.749,445147.0042,,,
2000,1,241,3,0,1,0,0,0,1,1,,5/12/200,DMONSON,GLBA,H,2714.77379,1.085909516,0,6505774.355,442465.4665,6507132.319,444813.5662,,,
2000,4,241,1,0,1,0,0,0,1,1,,5/15/200,DMONSON,GLBA,H,2714.77379,1.085909516,0,6505774.355,442465.4665,6507132.319,444813.5662,,,
2000,2,241,7,0,1,0,0,0,1,1,,5/13/200,DMONSON,GLBA,H,3422.91052,1.369164208,0,6509852.557,439147.2077,6511570.524,442107.4324,,,
2000,3,243,15,0,1,0,0,0,1,1,,5/14/200,DMONSON,GLBA,H,1735.68254,0.694273016,0,6500467.808,426874.4775,6501330.779,428380.7424,,,
2000,3,244,15,0,1,0,0,0,1,1,,5/14/200,DMONSON,GLBA,H,667.48911,0.266995644,0,6500379.404,445927.2281,6500705.535,446502.6103,,,
2000,4,244,1,0,1,0,0,0,2,1,,5/15/200,DMONSON,GLBA,H,501.24179,0.200496716,0,6503580.281,424273.5785,6503831.613,424713.6145,,,
2000,2,244,7,0,1,0,0,0,1,1,,5/13/200,DMONSON,GLBA,H,902.85505,0.36114202,0,6509147.968,437929.2625,6509599.604,438708.8106,,,
2000,3,245,15,0,1,0,0,0,1,1,,5/14/200,DMONSON,GLBA,H,2759.19673,1.103678692,0,6498726.985,428662.0424,6500094.689,431048.6464,,,
2000,1,245,3,0,1,0,0,0,1,1,,5/12/200,DMONSON,GLBA,H,819.38034,0.327752136,0,6503315.365,438213.1632,6503731.009,438925.5759,,,
2000,4,245,1,0,1,0,0,0,2,1,,5/15/200,DMONSON,GLBA,H,819.38034,0.327752136,0,6503315.365,438213.1632,6503731.009,438925.5759,,,
2000,2,245,7,0,1,0,0,0,1,1,,5/13/200,DMONSON,GLBA,H,674.81875,0.2699275,0,6509094.076,442640.1239,6509438.133,443224.4516,,,
2000,1,246,3,0,1,0,0,0,1,1,,5/12/200,DMONSON,GLBA,H,1696.9108,0.67876432,0,6501909.892,426195.3255,6502754.762,427662.184,,,
2000,4,246,1,0,1,0,0,0,2,1,,5/15/200,DMONSON,GLBA,H,1696.9108,0.67876432,0,6501909.892,426195.3255,6502754.762,427662.184,,,
2000,2,246,7,0,1,0,0,0,1,1,,5/13/200,DMONSON,GLBA,H,411.75583,0.164702332,0,6508243.884,441159.6791,6508461.163,441520.267,,,
2000,1,247,3,0,1,0,0,0,1,1,,5/12/200,DMONSON,GLBA,H,582.11502,0.232846008,0,6501788.737,430769.0622,6502076.716,431277.2062,,,
2000,4,247,1,0,1,0,0,0,2,1,,5/15/200,DMONSON,GLBA,H,582.11502,0.232846008,0,6501788.737,430769.0622,6502076.716,431277.2062,,,
2000,3,248,15,0,1,0,0,0,1,1,,5/14/200,DMONSON,GLBA,H,486.1255,0.1944502,0,6498048.806,446698.4868,6498302.792,447127.9423,,,
2000,1,248,3,0,1,0,0,0,1,1,,5/12/200,DMONSON,GLBA,H,1402.28341,0.560913364,0,6501257.003,444236.7505,6501945.012,445455.6711,,,
2000,4,248,1,0,1,0,0,0,1,1,,5/15/200,DMONSON,GLBA,H,1402.28341,0.560913364,0,6501257.003,444236.7505,6501945.012,445455.6711,,,
2000,3,249,15,0,1,0,0,0,1,1,,5/14/200,DMONSON,GLBA,H,2082.51238,0.833004952,0,6496842.879,430206.4811,6497887.617,432007.0175,,,
2000,1,249,3,0,1,0,0,0,1,1,,5/12/200,DMONSON,GLBA,H,639.0812,0.25563248,0,6501104.791,429576.4261,6501410.475,430123.7706,,,
2000,4,249,1,0,1,0,0,0,1,1,,5/15/200,DMONSON,GLBA,H,639.0812,0.25563248,0,6501104.791,429576.4261,6501410.475,430123.7706,,,
2000,2,249,7,0,1,0,0,0,1,1,,5/13/200,DMONSON,GLBA,H,863.42689,0.345370756,0,6506509.487,442959.4161,6506944.133,443699.9743,,,
2000,1,250,3,0,1,0,0,0,1,1,,5/12/200,DMONSON,GLBA,H,1330.6234,0.53224936,0,6500134.424,442304.595,6500804.257,443456.2299,,,
2000,4,250,1,0,1,0,0,0,2,1,,5/15/200,DMONSON,GLBA,H,1330.6234,0.53224936,0,6500134.424,442304.595,6500804.257,443456.2299,,,
2000,2,251,7,0,1,0,0,0,1,1,,5/13/200,DMONSON,GLBA,H,1039.30472,0.415721888,0,6505785.726,441702.2396,6506310.63,442599.0088,,,
2000,3,252,15,0,1,0,0,0,1,1,,5/14/200,DMONSON,GLBA,H,696.49369,0.278597476,0,6495978.667,428728.0047,6496339.025,429325.5541,,,
2000,1,252,3,0,1,0,0,0,1,1,,5/12/200,DMONSON,GLBA,H,1579.26529,0.631706116,0,6499845.347,427404.8406,6500636.776,428774.4248,,,
2000,4,252,1,0,1,0,0,0,2,1,,5/15/200,DMONSON,GLBA,H,1579.26529,0.631706116,0,6499845.347,427404.8406,6500636.776,428774.4248,,,
2000,1,253,3,0,1,0,0,0,1,1,,5/12/200,DMONSON,GLBA,H,589.17811,0.235671244,0,6499433.304,445894.7359,6499723.249,446402.0152,,,
2000,4,253,1,0,1,0,0,0,1,1,,5/15/200,DMONSON,GLBA,H,589.17811,0.235671244,0,6499433.304,445894.7359,6499723.249,446402.0152,,,
2000,3,254,15,1,1,1,0,1,1,1,33,5/14/200,DMONSON,GLBA,H,2824.0848,1.12963392,0,6495114.967,441610.117,6496526.71,444062.4695,442701.5018,6495617.862,20001033
2000,2,254,7,0,1,0,0,0,2,1,,5/13/200,DMONSON,GLBA,H,400.30971,0.160123884,0,6504154.384,429273.856,6504352.184,429625.5015,,,
2000,3,255,15,0,1,0,0,0,1,1,,5/14/200,DMONSON,GLBA,H,2787.326,1.1149304,0,6494848.048,445966.7319,6496244.477,448378.634,,,
2000,1,255,3,0,1,0,0,0,1,1,,5/12/200,DMONSON,GLBA,H,454.56607,0.181826428,0,6497320.625,447017.7805,6497537.926,447417.7479,,,
2000,4,255,1,0,1,0,0,0,1,1,,5/15/200,DMONSON,GLBA,H,454.56607,0.181826428,0,6497320.625,447017.7805,6497537.926,447417.7479,,,
2000,2,255,7,0,1,0,0,0,2,1,,5/13/200,DMONSON,GLBA,H,411.67183,0.164668732,0,6503936.599,424087.1219,6504133.932,424439.0619,,,
2000,3,256,15,0,1,0,0,0,1,1,,5/14/200,DMONSON,GLBA,H,400.59935,0.16023974,0,6494808.353,436294.9869,6495006.945,436637.3966,,,
2000,1,256,3,0,1,0,0,0,1,1,,5/12/200,DMONSON,GLBA,H,1173.19327,0.469277308,0,6496934.611,441559.8678,6497513.443,442575.6553,,,
2000,4,256,1,0,1,0,0,0,2,1,,5/15/200,DMONSON,GLBA,H,1173.19327,0.469277308,0,6496934.611,441559.8678,6497513.443,442575.6553,,,
2000,2,256,7,0,1,0,0,0,1,1,,5/13/200,DMONSON,GLBA,H,1749.81744,0.699926976,0,6503852.687,443142.7886,6504721.779,444653.6779,,,
2000,3,257,15,0,1,0,0,0,1,1,,5/14/200,DMONSON,GLBA,H,2667.63877,1.067055508,0,6494347.473,430665.8472,6495680.628,432976.2058,,,
2000,2,257,7,0,1,0,0,0,1,1,,5/13/200,DMONSON,GLBA,H,1494.86025,0.5979441,0,6502694.563,441143.3262,6503436.129,442440.5317,,,
2000,3,258,15,0,1,0,0,0,1,1,,5/14/200,DMONSON,GLBA,H,642.89426,0.257157704,0,6493788.893,429725.2849,6494112.984,430283.6418,,,
2000,1,258,3,0,1,0,0,0,1,1,,5/12/200,DMONSON,GLBA,H,2649.70186,1.059880744,0,6496022.979,430385.5797,6497356.132,432685.3882,,,
2000,4,258,1,0,1,0,0,0,1,1,,5/15/200,DMONSON,GLBA,H,2649.70186,1.059880744,0,6496022.979,430385.5797,6497356.132,432685.3882,,,
2000,2,258,7,0,1,0,0,0,2,1,,5/13/200,DMONSON,GLBA,H,2064.45377,0.825781508,0,6502194.286,425881.484,6503237.203,427671.1524,,,
2000,3,259,15,1,1,1,0,1,1,1,,5/14/200,DMONSON,GLBA,H,2580.79278,1.032317112,0,6492855.889,442507.0665,6494141.455,444735.7732,442628.3794,6492849.893,
2000,1,259,3,0,1,0,0,0,1,1,,5/12/200,DMONSON,GLBA,H,833.92191,0.333568764,0,6495356.995,429230.2372,6495770.833,429954.7525,,,
2000,4,259,1,0,1,0,0,0,1,1,,5/15/200,DMONSON,GLBA,H,833.92191,0.333568764,0,6495356.995,429230.2372,6495770.833,429954.7525,,,
2000,2,259,7,0,1,0,0,0,1,1,,5/13/200,DMONSON,GLBA,H,1247.0068,0.49880272,0,6501248.309,438644.7314,6501880.998,439728.4258,,,
2000,3,260,15,0,1,0,0,0,1,1,,5/14/200,DMONSON,GLBA,H,648.28642,0.259314568,0,6492572.355,446798.139,6492898.877,447355.1913,,,
2000,3,261,15,0,1,0,0,0,1,1,,5/14/200,DMONSON,GLBA,H,2498.0578,0.99922312,0,6492482.241,432242.4631,6493725.992,434406.4153,,,
2000,1,261,3,0,1,0,0,0,1,1,,5/12/200,DMONSON,GLBA,H,404.94022,0.161976088,0,6494025.068,436524.5237,6494223.523,436876.6784,,,
2000,4,261,1,0,1,0,0,0,2,1,,5/15/200,DMONSON,GLBA,H,404.94022,0.161976088,0,6494025.068,436524.5237,6494223.523,436876.6784,,,
2000,2,261,7,0,1,0,0,0,1,1,,5/13/200,DMONSON,GLBA,H,1732.16713,0.692866852,0,6500093.617,427031.9928,6500956.649,428538.3616,,,
2000,3,262,15,0,1,0,0,0,1,1,,5/14/200,DMONSON,GLBA,H,1018.27305,0.40730922,0,6492006.766,436229.8608,6492512.177,437110.8133,,,
2000,1,262,3,0,1,0,0,0,2,1,,5/12/200,DMONSON,GLBA,H,4155.24292,1.662097168,0,6492932.909,429845.6246,6495022.893,433449.4457,,,
2000,4,262,1,0,1,0,0,0,1,1,,5/15/200,DMONSON,GLBA,H,4155.24292,1.662097168,0,6492932.909,429845.6246,6495022.893,433449.4457,,,
2000,2,262,7,0,1,0,0,0,1,1,,5/13/200,DMONSON,GLBA,H,535.56238,0.214224952,0,6500024.021,446125.5153,6500296.102,446584.0741,,,
2000,3,263,15,1,1,1,0,1,1,1,31,5/14/200,DMONSON,GLBA,H,1105.39122,0.442156488,0,6491517.407,440179.0658,6492078.203,441137.9973,440907.2339,6491384.306,20001031
2000,3,263,15,2,1,4,0,4,1,1,31,5/14/200,DMONSON,GLBA,H,1105.39122,0.442156488,0,6491517.407,440179.0658,6492078.203,441137.9973,440926.2089,6491336.869,20002031
2000,3,263,15,3,1,9,0,9,1,1,31,5/14/200,DMONSON,GLBA,H,1105.39122,0.442156488,0,6491517.407,440179.0658,6492078.203,441137.9973,440954.6712,6491298.919,20003031
2000,3,263,15,4,1,1,0,1,1,1,,5/14/200,DMONSON,GLBA,H,1105.39122,0.442156488,0,6491517.407,440179.0658,6492078.203,441137.9973,441163.3953,6491555.08,
2000,1,263,3,0,1,0,0,0,1,1,,5/12/200,DMONSON,GLBA,H,2377.09379,0.950837516,0,6491896.64,432833.6176,6493086.829,434890.1441,,,
2000,4,263,1,0,1,0,0,0,1,1,,5/15/200,DMONSON,GLBA,H,2377.09379,0.950837516,0,6491896.64,432833.6176,6493086.829,434890.1441,,,
2000,3,264,15,0,1,0,0,0,1,1,,5/14/200,DMONSON,GLBA,H,420.53093,0.168212372,0,6491512.356,449761.0331,6491711.877,450122.4077,,,
2000,1,264,3,0,1,0,0,0,1,1,,5/12/200,DMONSON,GLBA,H,1278.26681,0.511306724,0,6491789.047,447078.3957,6492442.379,448182.8836,,,
2000,4,264,1,0,1,0,0,0,1,1,,5/15/200,DMONSON,GLBA,H,1278.26681,0.511306724,0,6491789.047,447078.3957,6492442.379,448182.8836,,,
2000,1,265,3,0,1,0,0,0,1,1,,5/12/200,DMONSON,GLBA,H,1798.56581,0.719426324,0,6488337.847,431481.3414,6489238.889,433040.2594,,,
2000,4,265,1,0,1,0,0,0,1,1,,5/15/200,DMONSON,GLBA,H,1798.56581,0.719426324,0,6488337.847,431481.3414,6489238.889,433040.2594,,,
2000,3,265,15,0,1,0,0,0,1,1,,5/14/200,DMONSON,GLBA,H,425.16991,0.170067964,0,6491501.554,435348.6786,6491699.744,435710.8143,,,
2000,2,265,7,0,1,0,0,0,1,1,,5/13/200,DMONSON,GLBA,H,411.2412,0.16449648,0,6497584.767,446701.8247,6497802.561,447063.0606,,,
2000,1,266,3,0,1,0,0,0,1,1,,5/12/200,DMONSON,GLBA,H,1186.50099,0.474600396,0,6486447.867,428194.5771,6487041.615,429225.1316,,,
2000,4,266,1,0,1,0,0,0,1,1,,5/15/200,DMONSON,GLBA,H,1186.50099,0.474600396,0,6486447.867,428194.5771,6487041.615,429225.1316,,,
2000,3,266,15,0,1,0,0,0,1,1,,5/14/200,DMONSON,GLBA,H,2465.62714,0.986250856,0,6491122.334,444305.055,6492373.008,446446.362,,,
2000,2,266,7,0,1,0,0,0,2,1,,5/13/200,DMONSON,GLBA,H,2207.94782,0.883179128,0,6496487.038,430384.1743,6497585.505,432301.9688,,,
2000,1,267,3,0,1,0,0,0,1,1,,5/12/200,DMONSON,GLBA,H,547.66822,0.219067288,0,6485457.455,436074.402,6485728.204,436545.0727,,,
2000,4,267,1,0,1,0,0,0,1,1,,5/15/200,DMONSON,GLBA,H,547.66822,0.219067288,0,6485457.455,436074.402,6485728.204,436545.0727,,,
2000,3,267,15,0,1,0,0,0,1,1,,5/14/200,DMONSON,GLBA,H,1099.88969,0.439955876,0,6490478.008,447962.8082,6491022.152,448920.5909,,,
2000,2,267,7,0,1,0,0,0,1,1,,5/13/200,DMONSON,GLBA,H,751.58517,0.300634068,0,6496478.637,435179.1991,6496857.577,435834.4602,,,
2000,1,268,3,0,1,0,0,0,1,1,,5/12/200,DMONSON,GLBA,H,914.25569,0.365702276,0,6485130.83,440304.7421,6485582.807,441098.426,,,
2000,4,268,1,0,1,0,0,0,1,1,,5/15/200,DMONSON,GLBA,H,914.25569,0.365702276,0,6485130.83,440304.7421,6485582.807,441098.426,,,
2000,3,268,15,0,1,0,0,0,1,1,,5/14/200,DMONSON,GLBA,H,461.66532,0.184666128,0,6490418.984,433497.0694,6490653.622,433889.1254,,,
2000,1,269,3,0,1,0,0,0,1,1,,5/12/200,DMONSON,GLBA,H,834.53334,0.333813336,0,6484055.56,448032.7875,6484472.875,448757.2787,,,
2000,4,269,1,0,1,0,0,0,2,1,,5/15/200,DMONSON,GLBA,H,834.53334,0.333813336,0,6484055.56,448032.7875,6484472.875,448757.2787,,,
2000,3,269,15,1,1,1,0,1,1,1,,5/14/200,DMONSON,GLBA,H,2499.63264,0.999853056,0,6489619.964,441692.8654,6490868.935,443855.2393,442349.3277,6489923.237,
2000,1,270,3,0,1,0,0,0,1,1,,5/12/200,DMONSON,GLBA,H,574.54969,0.229819876,0,6483493.074,447072.9515,6483783.306,447572.4597,,,
2000,4,270,1,0,1,0,0,0,2,1,,5/15/200,DMONSON,GLBA,H,574.54969,0.229819876,0,6483493.074,447072.9515,6483783.306,447572.4597,,,
2000,3,270,15,0,1,0,0,0,1,1,,5/14/200,DMONSON,GLBA,H,400.2687,0.16010748,0,6486295.15,435922.9736,6486493.553,436275.8416,,,
2000,2,270,7,0,1,0,0,0,2,1,,5/13/200,DMONSON,GLBA,H,922.82656,0.369130624,0,6495677.19,428974.4263,6496126.693,429777.0632,,,
2000,1,271,3,0,1,0,0,0,1,1,,5/12/200,DMONSON,GLBA,H,568.0372,0.22721488,0,6482640.911,445603.3932,6482930.956,446103.1203,,,
2000,4,271,1,0,1,0,0,0,1,1,,5/15/200,DMONSON,GLBA,H,568.0372,0.22721488,0,6482640.911,445603.3932,6482930.956,446103.1203,,,
2000,3,271,15,0,1,0,0,0,1,1,,5/14/200,DMONSON,GLBA,H,740.1014,0.29604056,0,6486108.418,450012.0369,6486471.53,450647.8566,,,
2000,1,272,3,0,1,0,0,0,1,1,,5/12/200,DMONSON,GLBA,H,946.33788,0.378535152,0,6481743.627,448838.2421,6482215.511,449660.9761,,,
2000,4,272,1,0,1,0,0,0,1,1,,5/15/200,DMONSON,GLBA,H,946.33788,0.378535152,0,6481743.627,448838.2421,6482215.511,449660.9761,,,
2000,3,272,15,0,1,0,0,0,1,1,,5/14/200,DMONSON,GLBA,H,480.64539,0.192258156,0,6485678.618,439681.7275,6485932.134,440093.5671,,,
2000,2,272,7,0,1,0,0,0,1,1,,5/13/200,DMONSON,GLBA,H,3028.53345,1.21141338,0,6494741.242,441778.9568,6496262.078,444397.7085,,,
2000,1,273,3,1,1,1,0,1,1,1,,5/12/200,DMONSON,GLBA,H,1351.44499,0.540577996,0,6480666.585,437367.5694,6481334.675,438545.1527,438261.8843,6481163.71,
2000,4,273,1,0,1,0,0,0,1,1,,5/15/200,DMONSON,GLBA,H,1351.44499,0.540577996,0,6480666.585,437367.5694,6481334.675,438545.1527,,,
2000,3,273,15,0,1,0,0,0,1,1,,5/14/200,DMONSON,GLBA,H,830.5974,0.33223896,0,6485019.569,448113.5777,6485436.898,448837.8849,,,
2000,2,273,7,0,1,0,0,0,1,1,,5/13/200,DMONSON,GLBA,H,3013.53374,1.205413496,0,6494565.559,446263.2337,6496070.964,448870.365,,,
2000,1,274,3,0,1,0,0,0,1,1,,5/12/200,DMONSON,GLBA,H,484.09414,0.193637656,0,6480558.286,441995.4366,6480793.348,442417.0986,,,
2000,4,274,1,0,1,0,0,0,1,1,,5/15/200,DMONSON,GLBA,H,484.09414,0.193637656,0,6480558.286,441995.4366,6480793.348,442417.0986,,,
2000,3,274,15,0,1,0,0,0,1,1,,5/14/200,DMONSON,GLBA,H,1694.05026,0.677620104,0,6483913.214,446204.0856,6484765.6,447673.0411,,,
2000,2,274,7,0,1,0,0,0,1,1,,5/13/200,DMONSON,GLBA,H,408.32707,0.163330828,0,6494362.701,436307.0959,6494561.136,436659.2323,,,
2000,1,275,3,0,1,0,0,0,1,1,,5/12/200,DMONSON,GLBA,H,2067.35367,0.826941468,0,6479947.763,445750.8299,6480981.237,447544.6881,,,
2000,4,275,1,0,1,0,0,0,1,1,,5/15/200,DMONSON,GLBA,H,2067.35367,0.826941468,0,6479947.763,445750.8299,6480981.237,447544.6881,,,
2000,3,275,15,1,1,1,0,1,1,1,29,5/14/200,DMONSON,GLBA,H,903.53255,0.36141302,0,6483420.969,435759.2945,6483872.185,436544.1455,436580.9522,6483528.689,20001029
2000,2,275,7,0,1,0,0,0,1,1,,5/13/200,DMONSON,GLBA,H,2362.24225,0.9448969,0,6492216.259,432596.668,6493406.484,434643.4138,,,
2000,1,276,3,0,1,0,0,0,1,1,,5/12/200,DMONSON,GLBA,H,665.91858,0.266367432,0,6477990.891,437558.4252,6478334.506,438128.3313,,,
2000,4,276,1,0,1,0,0,0,1,1,,5/15/200,DMONSON,GLBA,H,665.91858,0.266367432,0,6477990.891,437558.4252,6478334.506,438128.3313,,,
2000,3,276,15,1,1,1,0,1,1,1,37,5/14/200,DMONSON,GLBA,H,8887.73854,3.555095416,0,6483130.237,440050.6932,6487567.165,447739.605,444095.0202,6485483.106,20001037
2000,2,276,7,0,1,0,0,0,1,1,,5/13/200,DMONSON,GLBA,H,1173.59498,0.469437992,0,6491254.251,435713.1832,6491831.567,436731.3169,,,
2000,1,277,3,0,1,0,0,0,1,1,,5/12/200,DMONSON,GLBA,H,1956.20555,0.78248222,0,6477272.92,445918.2496,6478252.233,447605.4978,,,
2000,4,277,1,0,1,0,0,0,2,1,,5/15/200,DMONSON,GLBA,H,1956.20555,0.78248222,0,6477272.92,445918.2496,6478252.233,447605.4978,,,
2000,3,277,15,0,1,0,0,0,1,1,,5/14/200,DMONSON,GLBA,H,596.65433,0.238661732,0,6481485.665,437215.3439,6481793.045,437725.8716,,,
2000,2,277,7,1,1,7,0,7,1,1,18,5/13/200,DMONSON,GLBA,H,1554.41393,0.621765572,0,6491017.292,440113.2078,6491794.912,441463.4611,440832.2395,6491553.122,20001018
2000,2,277,7,2,1,1,0,1,1,1,,5/13/200,DMONSON,GLBA,H,1554.41393,0.621765572,0,6491017.292,440113.2078,6491794.912,441463.4611,440213.5964,6491172.419,
2000,1,278,3,0,1,0,0,0,1,1,,5/12/200,DMONSON,GLBA,H,419.78401,0.167913604,0,6475622.822,438251.1435,6475839.84,438614.8551,,,
2000,4,278,1,0,1,0,0,0,1,1,,5/15/200,DMONSON,GLBA,H,419.78401,0.167913604,0,6475622.822,438251.1435,6475839.84,438614.8551,,,
2000,3,278,15,0,1,0,0,0,1,1,,5/14/200,DMONSON,GLBA,H,1133.8607,0.45354428,0,6480834.909,440871.4049,6481395.593,441852.241,,,
2000,2,278,7,0,1,0,0,0,1,1,,5/13/200,DMONSON,GLBA,H,465.37251,0.186149004,0,6490993.781,449676.7702,6491229.787,450087.1564,,,
2000,1,279,3,0,1,0,0,0,1,1,,5/12/200,DMONSON,GLBA,H,1440.3299,0.57613196,0,6474707.028,446262.7713,6475413.984,447509.1869,,,
2000,4,279,1,0,1,0,0,0,2,1,,5/15/200,DMONSON,GLBA,H,1440.3299,0.57613196,0,6474707.028,446262.7713,6475413.984,447509.1869,,,
2000,3,279,15,0,1,0,0,0,1,1,,5/14/200,DMONSON,GLBA,H,800.37888,0.320151552,0,6479498.851,443370.9305,6479897.17,444067.3199,,,
2000,2,279,7,0,1,0,0,0,1,1,,5/13/200,DMONSON,GLBA,H,2280.89334,0.912357336,0,6489119.971,441617.4764,6490260.22,443594.2509,,,
2000,1,280,3,1,1,20,0,20,1,1,11,5/12/200,DMONSON,GLBA,H,935.74999,0.374299996,0,6472875.264,438295.6716,6473345.247,439102.0547,438907.9918,6473310.263,20001011
2000,1,280,3,2,1,1,0,1,1,1,11,5/12/200,DMONSON,GLBA,H,935.74999,0.374299996,0,6472875.264,438295.6716,6473345.247,439102.0547,438799.5839,6473245.219,20002011
2000,4,280,1,0,1,0,0,0,1,1,,5/15/200,DMONSON,GLBA,H,935.74999,0.374299996,0,6472875.264,438295.6716,6473345.247,439102.0547,,,
2000,3,280,15,0,1,0,0,0,1,1,,5/14/200,DMONSON,GLBA,H,1331.42459,0.532569836,0,6478599.741,446607.9192,6479270.857,447765.0242,,,
2000,2,280,7,0,1,0,0,0,2,1,,5/13/200,DMONSON,GLBA,H,517.78607,0.207114428,0,6487694.642,434353.6467,6487946.952,434804.4584,,,
2000,1,281,3,0,1,0,0,0,1,1,,5/12/200,DMONSON,GLBA,H,439.92882,0.175971528,0,6471651.777,445753.1171,6471869.221,446136.2496,,,
2000,4,281,1,1,1,1,0,1,3,1,49,5/15/200,DMONSON,GLBA,H,439.92882,0.175971528,0,6471651.777,445753.1171,6471869.221,446136.2496,445918.7497,6471845.67,20001049
2000,3,281,15,0,1,0,0,0,1,1,,5/14/200,DMONSON,GLBA,H,1148.86754,0.459547016,0,6478593.522,437013.337,6479171.647,438005.3131,,,
2000,2,281,7,0,1,0,0,0,1,1,,5/13/200,DMONSON,GLBA,H,784.11982,0.313647928,0,6486947.786,428262.0172,6487343.775,428939.2889,,,
2000,1,282,3,0,1,0,0,0,1,1,,5/12/200,DMONSON,GLBA,H,1597.67241,0.639068964,0,6468085.399,439586.5123,6468881.122,440964.405,,,
2000,4,282,1,0,1,0,0,0,3,1,,5/15/200,DMONSON,GLBA,H,1597.67241,0.639068964,0,6468085.399,439586.5123,6468881.122,440964.405,,,
2000,3,282,15,0,1,0,0,0,1,1,,5/14/200,DMONSON,GLBA,H,677.14523,0.270858092,0,6476388.345,437961.3437,6476713.159,438550.6165,,,
2000,2,282,7,0,1,0,0,0,1,1,,5/13/200,DMONSON,GLBA,H,450.24175,0.1800967,0,6485885.023,436032.8177,6486119.917,436425.1588,,,
2000,3,283,15,0,1,0,0,0,1,1,,5/14/200,DMONSON,GLBA,H,1401.08251,0.560433004,0,6475544.166,446118.4125,6476251.467,447335.3909,,,
2000,2,283,7,0,1,0,0,0,1,1,,5/13/200,DMONSON,GLBA,H,411.0012,0.16440048,0,6485305.563,439802.2654,6485504.166,440164.728,,,
2000,1,284,3,1,1,1,0,1,1,1,15,5/12/200,DMONSON,GLBA,H,2911.8956,1.16475824,0,6466156.807,445862.8311,6467626.154,448390.6758,446691.6138,6466654.074,20001015
2000,4,284,1,1,1,1,0,1,2,1,51,5/15/200,DMONSON,GLBA,H,2911.8956,1.16475824,0,6466156.807,445862.8311,6467626.154,448390.6758,447919.9519,6467287.795,20001051
2000,3,284,15,1,1,1,1,2,1,1,27,5/14/200,DMONSON,GLBA,H,1105.21673,0.442086692,0,6473676.662,438084.1527,6474236.959,439047.674,438838.9682,6473566.856,20001027
2000,3,284,15,2,1,1,0,1,1,1,,5/14/200,DMONSON,GLBA,H,1105.21673,0.442086692,0,6473676.662,438084.1527,6474236.959,439047.674,439104.617,6473794.555,
2000,2,284,7,0,1,0,0,0,1,1,,5/13/200,DMONSON,GLBA,H,2109.63137,0.843852548,0,6483884.587,446942.1999,6484936.648,448773.0614,,,
2000,3,285,15,0,1,0,0,0,1,1,,5/14/200,DMONSON,GLBA,H,956.96847,0.382787388,0,6472688.206,445962.3095,6473159.36,446797.0063,,,
2000,2,285,7,0,1,0,0,0,1,1,,5/13/200,DMONSON,GLBA,H,1354.16844,0.541667376,0,6483010.999,435859.496,6483697.347,437027.2397,,,
2000,3,286,15,1,1,1,0,1,1,1,,5/14/200,DMONSON,GLBA,H,558.1025,0.223241,0,6471543.727,439181.3868,6471814.703,439663.2145,439560.0153,6471859.113,
2000,2,286,7,1,1,1,0,1,1,1,21,5/13/200,DMONSON,GLBA,H,432.90005,0.17316002,0,6481166.494,437443.6268,6481383.283,437816.6044,437620.0564,6481274.137,20001021
2000,3,287,15,0,1,0,0,0,1,1,,5/14/200,DMONSON,GLBA,H,674.7269,0.26989076,0,6471074.032,438355.158,6471417.614,438935.7185,,,
2000,2,287,7,0,1,0,0,0,1,1,,5/13/200,DMONSON,GLBA,H,1224.40375,0.4897615,0,6479161.907,443570.3797,6479777.833,444629.8177,,,
2000,3,288,15,0,1,0,0,0,3,1,,5/14/200,DMONSON,GLBA,H,499.05834,0.199623336,0,6469879.135,450711.837,6470133.567,451144.0641,,,
2000,2,288,7,0,1,0,0,0,2,1,,5/13/200,DMONSON,GLBA,H,860.46358,0.344185432,0,6478346.853,437349.9894,6478761.894,438096.1459,,,
2000,3,289,15,0,1,0,0,0,3,1,,5/14/200,DMONSON,GLBA,H,4671.62113,1.868648452,0,6469741.232,445678.014,6472081.532,449725.8135,,,
2000,2,289,7,0,1,0,0,0,2,1,,5/13/200,DMONSON,GLBA,H,896.06384,0.358425536,0,6478244.804,446778.2517,6478679.796,447552.8252,,,
2000,3,290,15,0,1,0,0,0,1,1,,5/14/200,DMONSON,GLBA,H,720.91028,0.288364112,0,6468688.033,439020.1821,6469030.967,439649.7885,,,
2000,2,290,7,0,1,0,0,0,1,1,,5/13/200,DMONSON,GLBA,H,421.03325,0.1684133,0,6475996.533,438091.4804,6476213.384,438464.9014,,,
2000,2,291,7,0,1,0,0,0,3,1,,5/13/200,DMONSON,GLBA,H,1523.04079,0.609216316,0,6475098.296,446151.2534,6475859.972,447466.4605,,,
2000,3,292,15,2,1,1,0,1,2,1,,5/14/200,DMONSON,GLBA,H,3409.4728,1.36378912,0,6466903.594,445541.2702,6468608.449,448491.3385,447890.0058,6468234.903,
2000,3,292,15,1,1,1,0,1,2,1,41,5/14/200,DMONSON,GLBA,H,3409.4728,1.36378912,0,6466903.594,445541.2702,6468608.449,448491.3385,447244.8582,6467722.581,20001041
2000,2,292,7,1,1,1,0,1,1,1,,5/13/200,DMONSON,GLBA,H,1075.52699,0.430210796,0,6473249.125,438126.1408,6473772.774,439059.9616,438785.9597,6473541.104,
2000,2,292,7,2,1,1,0,1,1,1,,5/13/200,DMONSON,GLBA,H,1075.52699,0.430210796,0,6473249.125,438126.1408,6473772.774,439059.9616,438928.7239,6473636.28,
2000,2,292,7,3,1,55,0,55,1,1,,5/13/200,DMONSON,GLBA,H,1075.52699,0.430210796,1,6473249.125,438126.1408,6473772.774,439059.9616,438514.7703,6473484.671,
2000,3,293,15,0,1,0,0,0,2,1,,5/14/200,DMONSON,GLBA,H,1484.31103,0.593724412,0,6466772.283,440503.3493,6467513.958,441792.8742,,,
2000,2,293,7,0,1,0,0,0,2,1,,5/13/200,DMONSON,GLBA,H,734.54932,0.293819728,0,6472079.093,445720.0236,6472460.07,446358.7422,,,
2000,2,294,7,0,1,0,0,0,1,1,,5/13/200,DMONSON,GLBA,H,1599.16822,0.639667288,0,6469760.771,436900.8979,6470574.111,438279.0699,,,
2000,2,295,7,0,1,0,0,0,1,1,,5/13/200,DMONSON,GLBA,H,2083.22391,0.833289564,0,6468314.366,439180.2553,6469344.858,440981.1105,,,
2000,3,296,15,0,1,0,0,0,1,1,,5/14/200,DMONSON,GLBA,H,708.69122,0.283476488,0,6482616.772,448771.8766,6482980.061,449379.219,,,
2000,2,297,7,0,1,0,0,0,2,1,,5/13/200,DMONSON,GLBA,H,1251.29251,0.500517004,0,6466416.5,440712.7199,6467049.932,441795.7778,,,
2000,2,298,7,1,1,1,0,1,2,1,26,5/13/200,DMONSON,GLBA,H,3486.89936,1.394759744,0,6466385.257,445446.2614,6468126.26,448465.5202,445761.8689,6466470.077,20001026
2000,1,301,3,0,1,0,0,0,1,1,,5/12/200,DMONSON,GLBA,H,4910.87438,1.964349752,0,6508738.191,438019.2744,6511196.809,442275.5513,,,
2000,4,301,1,0,1,0,0,0,1,1,,5/15/200,DMONSON,GLBA,H,4910.87438,1.964349752,0,6508738.191,438019.2744,6511196.809,442275.5513,,,
2000,1,302,3,0,1,0,0,0,1,1,,5/12/200,DMONSON,GLBA,H,4033.88951,1.613555804,0,6502285.013,441224.1801,6504294.021,444715.2571,,,
2000,4,302,1,0,1,0,0,0,1,1,,5/15/200,DMONSON,GLBA,H,4033.88951,1.613555804,0,6502285.013,441224.1801,6504294.021,444715.2571,,,
2000,1,303,3,0,1,0,0,0,1,1,,5/12/200,DMONSON,GLBA,H,1800.65297,0.720261188,0,6500820.302,438715.3941,6501724.202,440267.7146,,,
2000,4,303,1,0,1,0,0,0,2,1,,5/15/200,DMONSON,GLBA,H,1800.65297,0.720261188,0,6500820.302,438715.3941,6501724.202,440267.7146,,,
2000,1,304,3,0,1,0,0,0,1,1,,5/12/200,DMONSON,GLBA,H,2772.3675,1.108947,0,6498212.592,429388.5572,6499599.126,431785.2048,,,
2000,4,304,1,0,1,0,0,0,2,1,,5/15/200,DMONSON,GLBA,H,2772.3675,1.108947,0,6498212.592,429388.5572,6499599.126,431785.2048,,,
2000,1,305,3,0,1,0,0,0,1,1,,5/12/200,DMONSON,GLBA,H,3232.46985,1.29298794,0,6494404.205,441977.4501,6496015.482,444771.9969,,,
2000,4,305,1,0,1,0,0,0,2,1,,5/15/200,DMONSON,GLBA,H,3232.46985,1.29298794,0,6494404.205,441977.4501,6496015.482,444771.9969,,,
2000,3,305,15,0,1,0,0,0,1,1,,5/14/200,DMONSON,GLBA,H,1385.71525,0.5542861,0,6509756.47,438180.3341,6510461.288,439388.3958,,,
2000,1,306,3,0,1,0,0,0,1,1,,5/12/200,DMONSON,GLBA,H,4870.00471,1.948001884,0,6494065.344,446198.1943,6496496.434,450415.9652,,,
2000,4,306,1,0,1,0,0,0,2,1,,5/15/200,DMONSON,GLBA,H,4870.00471,1.948001884,0,6494065.344,446198.1943,6496496.434,450415.9652,,,
2000,1,307,3,1,1,2,0,2,1,1,4,5/12/200,DMONSON,GLBA,H,6556.88033,2.622752132,0,6490553.397,440106.0983,6493829.88,445778.1674,441272.3791,6491388.296,20001004
2000,1,307,3,2,1,1,0,1,1,1,4,5/12/200,DMONSON,GLBA,H,6556.88033,2.622752132,0,6490553.397,440106.0983,6493829.88,445778.1674,441199.2299,6491278.572,20002004
2000,1,307,3,3,1,1,0,1,1,1,,5/12/200,DMONSON,GLBA,H,6556.88033,2.622752132,0,6490553.397,440106.0983,6493829.88,445778.1674,440614.0346,6490693.377,
2000,1,307,3,4,1,1,0,1,1,1,,5/12/200,DMONSON,GLBA,H,6556.88033,2.622752132,0,6490553.397,440106.0983,6493829.88,445778.1674,440504.3105,6490766.526,
2000,1,307,3,5,1,1,0,1,1,1,,5/12/200,DMONSON,GLBA,H,6556.88033,2.622752132,0,6490553.397,440106.0983,6493829.88,445778.1674,440358.0118,6490803.1,
2000,1,307,3,6,1,1,0,1,1,1,,5/12/200,DMONSON,GLBA,H,6556.88033,2.622752132,0,6490553.397,440106.0983,6493829.88,445778.1674,440449.4486,6490675.089,
2000,1,307,3,7,1,1,0,1,1,1,,5/12/200,DMONSON,GLBA,H,6556.88033,2.622752132,0,6490553.397,440106.0983,6493829.88,445778.1674,440358.0118,6490601.94,
2000,1,307,3,8,1,1,0,1,1,1,,5/12/200,DMONSON,GLBA,H,6556.88033,2.622752132,0,6490553.397,440106.0983,6493829.88,445778.1674,440248.2877,6490711.664,
2000,1,307,3,9,1,1,0,1,1,1,,5/12/200,DMONSON,GLBA,H,6556.88033,2.622752132,0,6490553.397,440106.0983,6493829.88,445778.1674,440248.2877,6490528.79,
2000,1,307,3,10,1,1,0,1,1,1,,5/12/200,DMONSON,GLBA,H,6556.88033,2.622752132,0,6490553.397,440106.0983,6493829.88,445778.1674,440120.2762,6490601.94,
2000,1,307,3,11,1,110,0,110,1,1,,5/12/200,DMONSON,GLBA,H,6556.88033,2.622752132,1,6490553.397,440106.0983,6493829.88,445778.1674,440915.5185,6490936.614,
2000,4,307,1,1,1,2,0,2,2,1,,5/15/200,DMONSON,GLBA,H,6556.88033,2.622752132,0,6490553.397,440106.0983,6493829.88,445778.1674,441316.0517,6491327.082,
2000,4,307,1,2,1,2,0,2,2,1,,5/15/200,DMONSON,GLBA,H,6556.88033,2.622752132,0,6490553.397,440106.0983,6493829.88,445778.1674,440774.5868,6491045.52,
2000,4,307,1,3,1,2,0,2,2,1,45,5/15/200,DMONSON,GLBA,H,6556.88033,2.622752132,0,6490553.397,440106.0983,6493829.88,445778.1674,440363.0732,6490828.934,20003045
2000,3,307,15,0,1,0,0,0,1,1,,5/14/200,DMONSON,GLBA,H,1067.68121,0.427072484,0,6506231.8,441660.6191,6506756.409,442576.6105,,,
2000,1,308,3,0,1,0,0,0,1,1,,5/12/200,DMONSON,GLBA,H,6708.16777,2.683267108,0,6488131.097,440729.0699,6491480.855,446540.8118,,,
2000,4,308,1,0,1,0,0,0,2,1,,5/15/200,DMONSON,GLBA,H,6708.16777,2.683267108,0,6488131.097,440729.0699,6491480.855,446540.8118,,,
2000,1,309,3,0,1,0,0,0,1,1,,5/12/200,DMONSON,GLBA,H,1221.35242,0.488540968,0,6486960.273,433875.2105,6487573.58,434934.1629,,,
2000,4,309,1,0,1,0,0,0,1,1,,5/15/200,DMONSON,GLBA,H,1221.35242,0.488540968,0,6486960.273,433875.2105,6487573.58,434934.1629,,,
2000,3,309,15,0,1,0,0,0,1,1,,5/14/200,DMONSON,GLBA,H,887.16798,0.354867192,0,6496798.277,434932.6708,6497249.639,435695.6365,,,
2000,3,310,15,0,1,0,0,0,1,1,,5/14/200,DMONSON,GLBA,H,2279.43303,0.911773212,0,6488977.941,430968.4318,6490112.987,432938.7934,,,
2000,1,310,3,0,1,0,0,0,1,1,,5/12/200,DMONSON,GLBA,H,9490.79154,3.796316616,0,6485998.843,441823.4026,6490747.821,450042.1997,,,
2000,4,310,1,1,1,1,0,1,1,1,46,5/15/200,DMONSON,GLBA,H,9490.79154,3.796316616,0,6485998.843,441823.4026,6490747.821,450042.1997,442680.543,6486540.532,20001046
2000,1,311,3,1,1,1,0,1,1,1,1,5/12/200,DMONSON,GLBA,H,11241.0369,4.49641476,0,6482581.923,440713.0509,6488200.071,450446.4131,444746.9759,6484823.138,20001001
2000,4,311,1,1,1,1,0,1,2,1,47,5/15/200,DMONSON,GLBA,H,11241.0369,4.49641476,0,6482581.923,440713.0509,6488200.071,450446.4131,444456.5476,6484894.479,20001047
2000,3,311,15,0,1,0,0,0,1,1,,5/14/200,DMONSON,GLBA,H,2455.90893,0.982363572,0,6488039.071,448541.8646,6489273.752,450663.7908,,,
2000,1,312,3,1,1,1,0,1,1,1,9,5/12/200,DMONSON,GLBA,H,1822.30735,0.72892294,0,6482456.886,435694.8788,6483377.852,437274.8059,436426.2323,6482793.242,20001009
2000,1,312,3,2,1,1,0,1,1,1,9,5/12/200,DMONSON,GLBA,H,1822.30735,0.72892294,0,6482456.886,435694.8788,6483377.852,437274.8059,436334.7958,6482921.253,20002009
2000,4,312,1,0,1,0,0,0,1,1,,5/15/200,DMONSON,GLBA,H,1822.30735,0.72892294,0,6482456.886,435694.8788,6483377.852,437274.8059,,,
2000,3,312,15,0,1,0,0,0,1,1,,5/14/200,DMONSON,GLBA,H,642.00973,0.256803892,0,6487447.351,428348.8563,6487663.628,428702.3604,,,
2000,2,312,7,0,1,0,0,0,1,1,,5/13/200,DMONSON,GLBA,H,535.60052,0.214240208,0,6507233.929,444196.8062,6507505.645,444664.329,,,
2000,1,313,3,1,1,2,0,2,1,1,13,5/12/200,DMONSON,GLBA,H,3868.44144,1.547376576,0,6469098.273,436548.8652,6471031.503,439904.6929,439791.1053,6470851.603,20001013
2000,4,313,1,1,1,1,0,1,2,1,48,5/15/200,DMONSON,GLBA,H,3868.44144,1.547376576,0,6469098.273,436548.8652,6471031.503,439904.6929,439834.1135,6470891.436,20001048
2000,4,313,1,2,1,1,0,1,2,1,48,5/15/200,DMONSON,GLBA,H,3868.44144,1.547376576,0,6469098.273,436548.8652,6471031.503,439904.6929,439725.8213,6470783.143,20002048
2000,4,313,1,3,1,3,0,3,2,1,48,5/15/200,DMONSON,GLBA,H,3868.44144,1.547376576,0,6469098.273,436548.8652,6471031.503,439904.6929,439769.1375,6470848.118,20003048
2000,4,313,1,4,1,2,0,2,2,1,48,5/15/200,DMONSON,GLBA,H,3868.44144,1.547376576,0,6469098.273,436548.8652,6471031.503,439904.6929,439682.5034,6470934.753,20004048
2000,3,313,15,1,1,1,0,1,1,1,,5/14/200,DMONSON,GLBA,H,5607.68261,2.243073044,0,6487162.103,442229.0709,6489970.158,447082.8628,443924.2483,6488063.695,
2000,2,313,7,0,1,0,0,0,1,1,,5/13/200,DMONSON,GLBA,H,1126.85269,0.450741076,0,6503580.382,437888.6239,6504158.861,438864.6202,,,
2000,1,314,3,0,1,0,0,0,1,1,,5/12/200,DMONSON,GLBA,H,6115.89925,2.4463597,0,6468940.525,445871.8061,6472007.697,451167.3277,,,
2000,4,314,1,0,1,0,0,0,1,1,,5/15/200,DMONSON,GLBA,H,6115.89925,2.4463597,0,6468940.525,445871.8061,6472007.697,451167.3277,,,
2000,3,314,15,0,1,0,0,0,1,1,,5/14/200,DMONSON,GLBA,H,4240.09958,1.696039832,0,6486122.15,430820.8929,6488230.635,434488.8391,,,
2000,2,314,7,0,1,0,0,0,2,1,,5/13/200,DMONSON,GLBA,H,1565.0442,0.62601768,0,6501604.74,429643.5177,6502378.567,431002.0258,,,
2000,1,315,3,0,1,0,0,0,1,1,,5/12/200,DMONSON,GLBA,H,980.25976,0.392103904,0,6466242.339,441188.4083,6466730.897,442035.068,,,
2000,4,315,1,0,1,0,0,0,3,1,,5/15/200,DMONSON,GLBA,H,980.25976,0.392103904,0,6466242.339,441188.4083,6466730.897,442035.068,,,
2000,3,315,15,0,1,0,0,0,1,1,,5/14/200,DMONSON,GLBA,H,1763.57855,0.70543142,0,6482771.367,444244.3893,6483659.326,445773.0148,,,
2000,2,315,7,0,1,0,0,0,1,1,,5/13/200,DMONSON,GLBA,H,3880.47803,1.552191212,0,6500380.972,441950.211,6502336.865,445306.4177,,,
2000,2,316,7,0,1,0,0,0,2,1,,5/13/200,DMONSON,GLBA,H,2783.72638,1.113490552,0,6498496.9,429064.5005,6499882.894,431480.4489,,,
2000,2,317,7,0,1,0,0,0,2,1,,5/13/200,DMONSON,GLBA,H,3830.76756,1.532307024,0,6493414.824,429883.3681,6495342.641,433202.9593,,,
2000,2,318,7,0,1,0,0,0,1,1,,5/13/200,DMONSON,GLBA,H,4497.46475,1.7989859,0,6492012.079,441835.2193,6494257.344,445735.6476,,,
2000,2,319,7,0,1,0,0,0,1,1,,5/13/200,DMONSON,GLBA,H,1770.25735,0.70810294,0,6490893.74,444718.8966,6491781.877,446244.304,,,
2000,2,320,7,0,1,0,0,0,1,1,,5/13/200,DMONSON,GLBA,H,1744.69873,0.697879492,0,6489687.627,447389.5269,6490558.375,448904.8277,,,
2000,2,321,7,0,1,0,0,0,1,1,,5/13/200,DMONSON,GLBA,H,2951.12119,1.180448476,0,6488820.114,431499.4967,6490279.727,434047.7425,,,
2000,2,322,7,0,1,0,0,0,1,1,,5/13/200,DMONSON,GLBA,H,5520.0821,2.20803284,0,6486535.085,441957.6161,6489306.752,446734.2517,,,
2000,2,323,7,0,1,0,0,0,1,1,,5/13/200,DMONSON,GLBA,H,1890.99024,0.756396096,0,6486468.625,432235.2823,6487405.766,433873.0295,,,
2000,2,324,7,0,1,0,0,0,1,1,,5/13/200,DMONSON,GLBA,H,11466.47003,4.586588012,0,6482847.158,440357.4129,6488573.287,450286.1519,,,
2000,2,325,7,0,1,0,0,0,1,1,,5/13/200,DMONSON,GLBA,H,1695.56243,0.678224972,0,6482525.042,444600.5528,6483358.409,446060.4065,,,
2000,2,326,7,0,1,0,0,0,1,1,,5/13/200,DMONSON,GLBA,H,1088.05374,0.435221496,0,6480533.633,441158.6418,6481076.407,442100.3455,,,
2000,2,327,7,1,1,1,1,2,1,1,23,5/13/200,DMONSON,GLBA,H,1694.61351,0.677845404,0,6470628.097,438387.1754,6471459.167,439852.733,439352.5126,6471075.707,20001023
2000,2,327,7,2,1,1,0,1,1,1,23,5/13/200,DMONSON,GLBA,H,1694.61351,0.677845404,0,6470628.097,438387.1754,6471459.167,439852.733,439264.953,6471023.171,20002023
2000,2,327,7,3,1,1,0,1,1,1,,5/13/200,DMONSON,GLBA,H,1694.61351,0.677845404,0,6470628.097,438387.1754,6471459.167,439852.733,439072.3223,6470865.564,
2000,2,327,7,4,1,1,0,1,1,1,,5/13/200,DMONSON,GLBA,H,1694.61351,0.677845404,0,6470628.097,438387.1754,6471459.167,439852.733,438897.2032,6470953.124,
2000,2,328,7,1,1,2,0,2,3,1,24,5/13/200,DMONSON,GLBA,H,5251.67737,2.100670948,0,6469349.954,445789.6545,6471981.077,450328.8085,447145.3084,6470007.481,20001024
2000,1,330,3,0,1,0,0,0,1,1,,5/12/200,DMONSON,GLBA,L,1601.51095,0.64060438,0,6510613.512,439149.486,6511408.598,440541.8258,,,
2000,2,330,7,0,1,0,0,0,1,1,,5/13/200,DMONSON,GLBA,L,3811.77891,1.524711564,0,6511114.891,436812.3111,6513011.415,440113.0579,,,
2000,4,330,1,0,1,0,0,0,2,1,,5/15/200,DMONSON,GLBA,L,3811.77891,1.524711564,0,6511114.891,436812.3111,6513011.415,440113.0579,,,
2000,1,333,3,0,1,0,0,0,1,1,,5/12/200,DMONSON,GLBA,L,1870.00246,0.748000984,0,6509204.714,436713.6185,6510143.846,438331.2946,,,
2000,3,333,15,0,1,0,0,0,1,1,,5/14/200,DMONSON,GLBA,L,1035.41013,0.414164052,0,6510667.518,439256.4976,6511191.856,440152.5064,,,
2000,4,334,1,0,1,0,0,0,1,1,,5/15/200,DMONSON,GLBA,L,986.17165,0.39446866,0,6508475.535,437039.7293,6508962.869,437897.3362,,,
2000,1,335,3,0,1,0,0,0,1,1,,5/12/200,DMONSON,GLBA,L,1100.71338,0.440285352,0,6507455.052,433671.2672,6507995.687,434627.0293,,,
2000,2,335,7,0,1,0,0,0,1,1,,5/13/200,DMONSON,GLBA,L,4302.22596,1.720890384,0,6507959.378,431352.1225,6510104.102,435077.6044,,,
2000,4,335,1,0,1,0,0,0,2,1,,5/15/200,DMONSON,GLBA,L,4302.22596,1.720890384,0,6507959.378,431352.1225,6510104.102,435077.6044,,,
2000,1,336,3,0,1,0,0,0,1,1,,5/12/200,DMONSON,GLBA,L,1994.97046,0.797988184,0,6507377.911,438354.9703,6508390.311,440080.3266,,,
2000,3,336,15,0,1,0,0,0,1,2,,5/14/200,DMONSON,GLBA,L,1553.18759,0.621275036,0,6509204.714,436713.6185,6509981.144,438058.4209,,,
2000,1,337,3,0,1,0,0,0,1,1,,5/12/200,DMONSON,GLBA,L,584.41113,0.233764452,0,6506643.697,432285.4174,6506950.425,432793.1463,,,
2000,2,338,7,0,1,0,0,0,1,1,,5/13/200,DMONSON,GLBA,L,2957.87799,1.183151196,0,6506649.027,438671.8928,6508112.821,441234.9541,,,
2000,4,338,1,0,1,0,0,0,1,1,,5/15/200,DMONSON,GLBA,L,2955.82944,1.182331776,0,6506649.027,438671.8928,6508112.821,441234.9541,,,
2000,2,339,7,0,1,0,0,0,1,1,,5/13/200,DMONSON,GLBA,L,2670.13006,1.068052024,0,6506112.245,432962.2523,6507446.569,435274.6517,,,
2000,4,339,1,0,1,0,0,0,1,1,,5/15/200,DMONSON,GLBA,L,2670.13006,1.068052024,0,6506112.245,432962.2523,6507446.569,435274.6517,,,
2000,3,339,15,0,1,0,0,0,1,1,,5/14/200,DMONSON,GLBA,L,2783.68317,1.113473268,0,6507377.911,438354.9703,6508769.476,440771.7498,,,
2000,1,340,3,0,1,0,0,0,1,1,,5/12/200,DMONSON,GLBA,L,1640.93715,0.65637486,0,6504879.106,429229.0343,6505707.244,430655.1384,,,
2000,2,340,7,0,1,0,0,0,1,1,,5/13/200,DMONSON,GLBA,L,2772.09129,1.108836516,0,6504771.143,435433.0773,6506161.212,437833.2073,,,
2000,4,340,1,0,1,0,0,0,1,1,,5/15/200,DMONSON,GLBA,L,2772.09129,1.108836516,0,6504771.143,435433.0773,6506161.212,437833.2073,,,
2000,3,340,15,0,1,0,0,0,1,1,,5/14/200,DMONSON,GLBA,L,1383.49718,0.553398872,0,6507310.734,433427.2975,6507995.687,434627.0293,,,
2000,2,341,7,0,1,0,0,0,2,1,,5/13/200,DMONSON,GLBA,L,1598.65265,0.63946106,0,6504221.071,429690.8075,6505031.508,431078.0629,,,
2000,4,341,1,0,1,0,0,0,1,1,,5/15/200,DMONSON,GLBA,L,1599.35736,0.639742944,0,6504221.071,429690.8075,6505031.508,431078.0629,,,
2000,1,341,3,1,1,1,0,1,1,1,8,5/12/200,DMONSON,GLBA,L,4289.28651,1.715714604,0,6504630.541,438379.0475,6506763.72,442084.0189,440393.5502,6505682.644,20001008
2000,3,341,15,0,1,0,0,0,1,1,,5/14/200,DMONSON,GLBA,L,687.35333,0.274941332,0,6506643.697,432285.4174,6506986.034,432880.7123,,,
2000,4,342,1,0,1,0,0,0,2,1,,5/15/200,DMONSON,GLBA,L,5190.93158,2.076372632,0,6504056.897,424582.6049,6506645.232,429077.5957,,,
2000,1,343,3,0,1,0,0,0,1,1,,5/12/200,DMONSON,GLBA,L,1851.62607,0.740650428,0,6503384.612,436222.3178,6504305.3,437822.8596,,,
2000,4,343,1,0,1,0,0,0,1,1,,5/15/200,DMONSON,GLBA,L,3832.88682,1.533154728,0,6503937.252,438793.4606,6505853.744,442118.7721,,,
2000,1,343,3,0,1,0,0,0,1,1,,5/12/200,DMONSON,GLBA,L,1486.41595,0.59456638,0,6505248.115,434658.1145,6505987.841,435936.4463,,,
2000,3,343,15,0,1,0,0,0,1,1,,5/14/200,DMONSON,GLBA,L,1486.41595,0.59456638,0,6505248.115,434658.1145,6505987.841,435936.4463,,,
2000,4,344,1,0,1,0,0,0,2,1,,5/15/200,DMONSON,GLBA,L,1743.69567,0.697478268,0,6502654.927,436577.8743,6503540.034,438091.0325,,,
2000,1,344,3,0,1,0,0,0,1,1,,5/12/200,DMONSON,GLBA,L,1657.25024,0.662900096,0,6503009.063,425984.0459,6503836.019,427411.5382,,,
2000,3,344,15,0,1,0,0,0,1,1,,5/14/200,DMONSON,GLBA,L,1579.79156,0.631916624,0,6504915.163,429287.6904,6505707.244,430655.1384,,,
2000,4,345,1,0,1,0,0,0,2,1,,5/15/200,DMONSON,GLBA,L,378.74037,0.151496148,0,6502301.775,431145.7585,6502481.53,431477.8027,,,
2000,1,345,3,0,1,0,0,0,1,1,,5/12/200,DMONSON,GLBA,L,1913.87558,0.765550232,0,6502491.566,429872.3426,6503445.741,431533.4607,,,
2000,3,345,15,0,1,0,0,0,1,1,,5/14/200,DMONSON,GLBA,L,3541.68815,1.41667526,0,6504666.275,438466.6108,6506437.952,441528.4506,,,
2000,4,346,1,1,1,1,0,1,2,1,44,5/15/200,DMONSON,GLBA,L,1098.27383,0.439309532,0,6501948.806,440145.4128,6502491.177,441091.8928,440583.3567,6502353.176,20001044
2000,1,346,3,1,1,4,0,4,1,1,7,5/12/200,DMONSON,GLBA,L,7223.16063,2.889264252,0,6501088.07,437055.4603,6504704.016,443309.8854,441496.5753,6503498.221,20001007
2000,1,346,3,2,1,1,0,1,1,1,7,5/12/200,DMONSON,GLBA,L,7223.16063,2.889264252,0,6501088.07,437055.4603,6504704.016,443309.8854,441431.6912,6503519.849,20002007
2000,1,346,3,3,1,1,0,1,1,1,7,5/12/200,DMONSON,GLBA,L,7223.16063,2.889264252,0,6501088.07,437055.4603,6504704.016,443309.8854,441366.808,6503563.105,20003007
2000,1,346,3,4,1,1,0,1,1,1,7,5/12/200,DMONSON,GLBA,L,7223.16063,2.889264252,0,6501088.07,437055.4603,6504704.016,443309.8854,441301.9239,6503563.105,20004007
2000,1,346,3,5,1,3,0,3,1,1,7,5/12/200,DMONSON,GLBA,L,7223.16063,2.889264252,0,6501088.07,437055.4603,6504704.016,443309.8854,441172.1566,6503606.361,20005007
2000,1,347,3,0,1,0,0,0,1,1,,5/12/200,DMONSON,GLBA,L,1933.92335,0.77356934,0,6500211.516,430741.014,6501184.452,432412.8535,,,
2000,4,347,1,0,1,0,0,0,2,1,,5/15/200,DMONSON,GLBA,L,678.13158,0.271252632,0,6501671.643,430051.0614,6502013.642,430647.3038,,,
2000,3,347,15,0,1,0,0,0,1,1,,5/14/200,DMONSON,GLBA,L,1556.74665,0.62269866,0,6503835.155,441818.0105,6504613.351,443163.5731,,,
2000,1,348,3,1,1,1,0,1,1,1,,5/12/200,DMONSON,GLBA,L,1510.11413,0.604045652,0,6500165.496,440243.7991,6500925.176,441551.9587,441237.0407,6500600.076,
2000,1,348,3,2,1,1,0,1,1,1,,5/12/200,DMONSON,GLBA,L,1510.11413,0.604045652,0,6500165.496,440243.7991,6500925.176,441551.9587,441237.0407,6500837.984,
2000,4,348,1,0,1,0,0,0,2,1,,5/15/200,DMONSON,GLBA,L,1583.66714,0.633466856,0,6500250.245,437216.1105,6501045.107,438583.4774,,,
2000,3,348,15,0,1,0,0,0,1,1,,5/14/200,DMONSON,GLBA,L,1603.27403,0.641309612,0,6503384.612,436222.3178,6504178.813,437608.1503,,,
2000,1,349,3,0,1,0,0,0,1,1,,5/12/200,DMONSON,GLBA,L,1720.48039,0.688192156,0,6498918.53,438085.2679,6499767.563,439569.8865,,,
2000,4,349,1,0,1,0,0,0,2,1,,5/15/200,DMONSON,GLBA,L,1571.67909,0.628671636,0,6499823.998,431663.3148,6500617.085,433022.3303,,,
2000,3,349,15,0,1,0,0,0,1,1,,5/14/200,DMONSON,GLBA,L,1349.36441,0.539745764,0,6503027.067,426013.4034,6503710.466,427177.119,,,
2000,2,349,7,0,1,0,0,0,1,1,,5/13/200,DMONSON,GLBA,L,1069.25828,0.427703312,0,6508475.535,437039.7293,6508998.902,437965.5021,,,
2000,1,350,3,0,1,0,0,0,1,1,,5/12/200,DMONSON,GLBA,L,2643.6255,1.0574502,0,6498094.263,431865.3726,6499409.89,434153.4728,,,
2000,4,350,1,0,1,0,0,0,2,1,,5/15/200,DMONSON,GLBA,L,3620.46097,1.448184388,0,6498478.304,438930.263,6500286.463,442064.925,,,
2000,3,350,15,0,1,0,0,0,1,1,,5/14/200,DMONSON,GLBA,L,1941.12205,0.77644882,0,6502473.359,429852.6694,6503445.741,431533.4607,,,
2000,4,351,1,0,1,0,0,0,1,1,,5/15/200,DMONSON,GLBA,L,3653.78021,1.461512084,0,6497738.114,442443.4004,6499567.241,445606.2451,,,
2000,1,351,3,0,1,0,0,0,1,1,,5/12/200,DMONSON,GLBA,L,5546.04905,2.21841962,0,6497797.817,440933.7181,6500567.659,445736.3246,,,
2000,3,351,15,0,1,0,0,0,1,1,,5/14/200,DMONSON,GLBA,L,4801.45701,1.920582804,0,6501088.07,437055.4603,6503491.599,441213.3956,,,
2000,1,352,3,0,1,0,0,0,1,1,,5/12/200,DMONSON,GLBA,L,1847.0594,0.73882376,0,6497329.788,435338.6193,6498250.122,436941.8116,,,
2000,4,352,1,0,1,0,0,0,2,1,,5/15/200,DMONSON,GLBA,L,3469.30105,1.38772042,0,6497562.587,432553.3693,6499312.044,435565.0959,,,
2000,3,352,15,0,1,0,0,0,1,1,,5/14/200,DMONSON,GLBA,L,1723.3665,0.6893466,0,6500319.584,430926.8157,6501184.452,432412.8535,,,
2000,4,353,1,0,1,0,0,0,2,1,,5/15/200,DMONSON,GLBA,L,1681.55598,0.672622392,0,6496708.494,435870.7521,6497557.155,437327.6497,,,
2000,1,353,3,0,1,0,0,0,1,1,,5/12/200,DMONSON,GLBA,L,3271.39765,1.30855906,0,6496715.193,443861.7756,6498345.838,446692.8677,,,
2000,3,353,15,0,1,0,0,0,1,1,,5/14/200,DMONSON,GLBA,L,3917.92137,1.567168548,0,6498918.53,438085.2679,6500870.67,441473.7369,,,
2000,1,354,3,0,1,0,0,0,1,1,,5/12/200,DMONSON,GLBA,L,1583.0325,0.633213,0,6495250.059,436525.0657,6496026.13,437893.9987,,,
2000,4,354,1,0,1,0,0,0,2,1,,5/15/200,DMONSON,GLBA,L,903.87612,0.361550448,0,6496688.576,440645.7051,6497140.762,441427.3706,,,
2000,3,354,15,0,1,0,0,0,1,1,,5/14/200,DMONSON,GLBA,L,2623.43669,1.049374676,0,6498094.094,431875.0531,6499409.89,434153.4728,,,
2000,1,355,3,0,1,0,0,0,1,1,,5/12/200,DMONSON,GLBA,L,4987.72005,1.99508802,0,6492863.487,437194.037,6495357.645,441516.8567,,,
2000,4,355,1,0,1,0,0,0,1,1,,5/15/200,DMONSON,GLBA,L,2471.51516,0.988606064,0,6496239.94,444649.2476,6497472.239,446787.4376,,,
2000,3,355,15,0,1,0,0,0,1,1,,5/14/200,DMONSON,GLBA,L,5584.49625,2.2337985,0,6497797.817,440933.7181,6500585.676,445775.2786,,,
2000,1,356,3,1,1,2,0,2,1,1,5,5/12/200,DMONSON,GLBA,L,1732.08985,0.69283594,0,6492356.98,441113.1084,6493225.582,442609.4536,441929.1347,6492705.875,20001005
2000,2,356,7,0,1,0,0,0,1,1,,5/13/200,DMONSON,GLBA,L,1693.01808,0.677207232,0,6494448.073,436764.0077,6495296.918,438231.2155,,,
2000,4,356,1,0,1,0,0,0,2,1,,5/15/200,DMONSON,GLBA,L,1693.01808,0.677207232,0,6494448.073,436764.0077,6495296.918,438231.2155,,,
2000,3,356,15,0,1,0,0,0,1,1,,5/14/200,DMONSON,GLBA,L,1581.80856,0.632723424,0,6497455.831,435573.1384,6498250.122,436941.8116,,,
2000,1,357,3,0,1,0,0,0,1,1,,5/12/200,DMONSON,GLBA,L,6846.0769,2.73843076,0,6488437.348,434336.989,6491868.78,440262.0301,,,
2000,4,357,1,0,1,0,0,0,3,1,,5/15/200,DMONSON,GLBA,L,5901.37899,2.360551596,0,6491664.409,436738.3086,6494628.751,441854.8059,,,
2000,3,357,15,0,1,0,0,0,1,1,,5/14/200,DMONSON,GLBA,L,3054.67596,1.221870384,0,6496751.33,443930.0945,6498273.203,446575.6962,,,
2000,2,357,7,0,1,0,0,0,1,1,,5/13/200,DMONSON,GLBA,L,3271.90573,1.308762292,0,6504027.755,438939.9029,6505654.675,441777.5833,,,
2000,1,358,3,0,1,0,0,0,1,1,,5/12/200,DMONSON,GLBA,L,5228.92588,2.091570352,0,6486682.116,436094.3991,6489301.875,440630.3606,,,
2000,4,358,1,0,1,0,0,0,1,1,,5/15/200,DMONSON,GLBA,L,2411.17121,0.964468484,0,6490112.891,434035.2248,6491321.793,436121.6822,,,
2000,3,358,15,0,1,0,0,0,1,1,,5/14/200,DMONSON,GLBA,L,1596.76598,0.638706392,0,6495231.66,436515.0762,6496026.13,437893.9987,,,
2000,2,358,7,0,1,0,0,0,2,1,,5/13/200,DMONSON,GLBA,L,5262.0252,2.10481008,0,6504020.911,424523.8909,6506645.232,429077.5957,,,
2000,1,359,3,0,1,0,0,0,1,1,,5/12/200,DMONSON,GLBA,L,3753.296,1.5013184,0,6484114.981,436450.9031,6485993.914,439696.2982,,,
2000,4,359,1,0,1,0,0,0,1,1,,5/15/200,DMONSON,GLBA,L,5890.66843,2.356267372,0,6487815.932,434870.2345,6490778.15,439973.7336,,,
2000,3,359,15,1,1,1,0,1,1,1,32,5/14/200,DMONSON,GLBA,L,5018.77782,2.007511128,0,6492827.311,437135.2801,6495339.525,441487.5174,441628.283,6494970.566,20001032
2000,2,359,7,0,1,0,0,0,1,1,,5/13/200,DMONSON,GLBA,L,492.38522,0.196954088,0,6503359.619,442594.1068,6503613.153,443023.2649,,,
2000,2,359,7,0,1,0,0,0,1,1,,5/13/200,DMONSON,GLBA,L,492.38522,0.196954088,0,6503359.619,442594.1068,6503613.153,443023.2649,,,
2000,1,360,3,0,1,0,0,0,1,1,,5/12/200,DMONSON,GLBA,L,2273.30962,0.909323848,0,6481999.474,437583.311,6483137.85,439555.1081,,,
2000,4,360,1,1,1,1,0,1,1,1,,5/15/200,DMONSON,GLBA,L,4780.11759,1.912047036,0,6485970.843,436461.5895,6488355.827,440596.5822,439242.9281,6487625.291,
2000,3,360,15,0,1,0,0,0,1,1,,5/14/200,DMONSON,GLBA,L,1456.4696,0.58258784,0,6492356.98,441113.1084,6493080.56,442374.6482,,,
2000,2,360,7,0,1,0,0,0,1,1,,5/13/200,DMONSON,GLBA,L,1602.68361,0.641073444,0,6502654.927,436577.8743,6503467.812,437964.1814,,,
2000,1,361,3,0,1,0,0,0,1,1,,5/12/200,DMONSON,GLBA,L,2314.24727,0.925698908,0,6479649.489,438304.716,6480806.341,440306.9038,,,
2000,4,361,1,0,1,0,0,0,1,1,,5/15/200,DMONSON,GLBA,L,3194.73132,1.277892528,0,6483584.142,437142.0454,6485192.588,439907.3881,,,
2000,3,361,15,1,1,1,0,1,1,1,,5/14/200,DMONSON,GLBA,L,6567.99429,2.627197716,0,6488455.415,434366.4133,6491742.008,440056.4278,439465.1417,6490890.959,
2000,2,361,7,0,1,0,0,0,2,1,,5/13/200,DMONSON,GLBA,L,467.01158,0.186804632,0,6502247.478,431067.4136,6502481.53,431477.8027,,,
2000,1,362,3,0,1,0,0,0,1,1,,5/12/200,DMONSON,GLBA,L,5371.55837,2.148623348,0,6476919.708,438398.0861,6479614.831,443051.5782,,,
2000,4,362,1,1,1,1,0,1,1,1,43,5/15/200,DMONSON,GLBA,L,2348.57422,0.939429688,0,6481559.476,438412.5451,6482734.346,440452.9014,439864.3161,6482506.237,20001043
2000,3,362,15,1,1,1,0,1,1,1,30,5/14/200,DMONSON,GLBA,L,6258.16345,2.50326538,0,6486718.434,436143.5475,6489844.517,441570.078,440869.2854,6489031.416,20001030
2000,2,362,7,0,1,0,0,0,1,1,,5/13/200,DMONSON,GLBA,L,1448.4576,0.57938304,0,6501804.082,439901.3547,6502527.265,441160.1385,,,
2000,1,363,3,1,1,1,0,1,1,1,,5/12/200,DMONSON,GLBA,L,7471.64106,2.988656424,0,6474461.437,438934.2605,6478189.558,445395.6493,440554.034,6475391.543,
2000,1,363,3,2,1,2,0,2,1,1,,5/12/200,DMONSON,GLBA,L,7471.64106,2.988656424,0,6474461.437,438934.2605,6478189.558,445395.6493,440895.081,6475680.12,
2000,1,363,3,3,1,1,0,1,1,1,,5/12/200,DMONSON,GLBA,L,7471.64106,2.988656424,0,6474461.437,438934.2605,6478189.558,445395.6493,441209.8923,6475889.995,
2000,1,363,3,4,1,1,0,1,1,1,,5/12/200,DMONSON,GLBA,L,7471.64106,2.988656424,0,6474461.437,438934.2605,6478189.558,445395.6493,443649.6874,6477227.947,
2000,4,363,1,1,1,1,0,1,1,1,,5/15/200,DMONSON,GLBA,L,4423.62675,1.7694507,0,6478540.612,438005.0746,6480764.847,441833.1612,438207.2814,6478689.139,
2000,3,363,15,0,1,0,0,0,1,1,,5/14/200,DMONSON,GLBA,L,3600.90445,1.44036178,0,6484115.297,436431.4733,6485903.383,439549.2116,,,
2000,2,363,7,0,1,0,0,0,1,1,,5/13/200,DMONSON,GLBA,L,1649.93253,0.659973012,0,6500250.245,437216.1105,6501081.305,438642.0997,,,
2000,1,364,3,1,1,1,0,1,1,1,12,5/12/200,DMONSON,GLBA,L,7470.32059,2.988128236,0,6472075.673,439589.2403,6475804.881,446053.827,440973.7844,6472925.513,20001012
2000,4,364,1,0,1,0,0,0,1,1,,5/15/200,DMONSON,GLBA,L,6300.18108,2.520072432,0,6476082.43,438531.0108,6479230.137,443989.7065,,,
2000,3,364,15,0,1,0,0,0,1,1,,5/14/200,DMONSON,GLBA,L,2254.71101,0.901884404,0,6482017.719,437603.0472,6483137.85,439555.1081,,,
2000,2,364,7,0,1,0,0,0,2,1,,5/13/200,DMONSON,GLBA,L,1657.13248,0.662852992,0,6499788.246,431585.2548,6500617.085,433022.3303,,,
2000,1,365,3,0,1,0,0,0,1,1,,5/12/200,DMONSON,GLBA,L,6746.37626,2.698550504,0,6469707.7,440303.8514,6473094.023,446143.2775,,,
2000,4,365,1,1,1,1,0,1,1,1,42,5/15/200,DMONSON,GLBA,L,7758.00952,3.103203808,0,6473624.18,439067.4017,6477497.467,445785.0793,439805.1376,6474073.113,20001042
2000,4,365,1,2,1,1,0,1,1,1,,5/15/200,DMONSON,GLBA,L,7758.00952,3.103203808,0,6473624.18,439067.4017,6477497.467,445785.0793,439213.3406,6473629.264,
2000,3,365,15,0,1,0,0,0,1,1,,5/14/200,DMONSON,GLBA,L,2558.52897,1.023411588,0,6479631.392,438275.246,6480914.867,440493.3328,,,
2000,2,365,7,0,1,0,0,0,1,1,,5/13/200,DMONSON,GLBA,L,3572.8924,1.42915696,0,6498478.304,438930.263,6500268.482,442025.9496,,,
2000,1,366,3,0,1,0,0,0,1,1,,5/12/200,DMONSON,GLBA,L,4379.20032,1.751680128,0,6467810.842,441797.2604,6470002.22,445593.8502,,,
2000,4,366,1,0,1,0,0,0,2,1,,5/15/200,DMONSON,GLBA,L,7211.09185,2.88443674,0,6471310.129,439889.4505,6474931.562,446129.4898,,,
2000,3,366,15,0,1,0,0,0,1,1,,5/14/200,DMONSON,GLBA,L,415.36022,0.166144088,0,6478570.347,446043.1565,6478769.528,446405.9013,,,
2000,2,366,7,0,1,0,0,0,2,1,,5/13/200,DMONSON,GLBA,L,3614.96205,1.44598482,0,6497490.544,432426.2212,6499312.044,435565.0959,,,
2000,1,367,3,0,1,0,0,0,1,1,,5/12/200,DMONSON,GLBA,L,2818.73639,1.127494556,0,6466185.488,443813.3742,6467599.055,446253.4293,,,
2000,4,367,1,0,1,0,0,0,3,1,,5/15/200,DMONSON,GLBA,L,5310.79585,2.12431834,0,6469214.24,441027.9231,6471857.637,445629.244,,,
2000,3,367,15,0,1,0,0,0,1,1,,5/14/200,DMONSON,GLBA,L,5338.29354,2.135317416,0,6476937.805,438427.5754,6479614.831,443051.5782,,,
2000,2,367,7,0,1,0,0,0,1,1,,5/13/200,DMONSON,GLBA,L,1644.50975,0.6578039,0,6496726.413,435909.7921,6497557.155,437327.6497,,,
2000,4,368,1,1,1,2,0,2,3,1,50,5/15/200,DMONSON,GLBA,L,4432.99842,1.773199368,0,6466937.017,441901.4659,6469164.936,445748.092,444776.243,6468598.979,20001050
2000,4,368,1,2,1,1,0,1,3,1,50,5/15/200,DMONSON,GLBA,L,4432.99842,1.773199368,0,6466937.017,441901.4659,6469164.936,445748.092,444865.0119,6468717.339,20002050
2000,3,368,15,0,1,0,0,0,1,1,,5/14/200,DMONSON,GLBA,L,7681.95718,3.072782872,0,6474461.588,438924.5214,6478298.459,445572.3249,,,
2000,2,368,7,0,1,0,0,0,1,1,,5/13/200,DMONSON,GLBA,L,6166.33529,2.466534116,0,6496688.576,440645.7051,6499784.665,445986.7158,,,
2000,3,369,15,0,1,0,0,0,1,1,,5/14/200,DMONSON,GLBA,L,7393.28357,2.957313428,0,6472075.673,439589.2403,6475768.571,445994.9042,,,
2000,2,369,7,0,1,0,0,0,1,1,,5/13/200,DMONSON,GLBA,L,2583.44168,1.033376672,0,6496167.229,444541.66,6497472.372,446777.7557,,,
2000,3,370,15,1,1,1,0,1,2,1,,5/14/200,DMONSON,GLBA,L,6989.58756,2.795835024,0,6469418.686,439782.5276,6472912.616,445838.715,441172.8855,6470151.371,
2000,3,371,15,0,1,0,0,0,3,1,,5/14/200,DMONSON,GLBA,L,4404.2931,1.76171724,0,6467774.597,441738.1798,6469965.784,445544.588,,,
2000,2,371,7,0,1,0,0,0,1,1,,5/13/200,DMONSON,GLBA,L,5826.52095,2.33060838,0,6491718.978,436807.0823,6494628.751,441854.8059,,,
2000,3,372,15,0,1,0,0,0,2,1,,5/14/200,DMONSON,GLBA,L,1849.55705,0.73982282,0,6466185.488,443813.3742,6467128.15,445407.7504,,,
2000,2,372,7,0,1,0,0,0,1,1,,5/13/200,DMONSON,GLBA,L,1924.96379,0.769985516,0,6490167.085,434123.4641,6491123.086,435788.6266,,,
2000,2,373,7,0,1,0,0,0,1,1,,5/13/200,DMONSON,GLBA,L,6040.22904,2.416091616,0,6487815.932,434870.2345,6490850.438,440100.9505,,,
2000,2,374,7,0,1,0,0,0,1,1,,5/13/200,DMONSON,GLBA,L,4973.74059,1.989496236,0,6485988.767,436500.7321,6488482.626,440802.3404,,,
2000,2,375,7,0,1,0,0,0,1,1,,5/13/200,DMONSON,GLBA,L,3206.93164,1.282772656,0,6483566.211,437102.8828,6485174.48,439877.9665,,,
2000,2,376,7,0,1,0,0,0,1,1,,5/13/200,DMONSON,GLBA,L,2783.26994,1.113307976,0,6481324.384,438019.8807,6482716.086,440433.1829,,,
2000,2,377,7,0,1,0,0,0,1,1,,5/13/200,DMONSON,GLBA,L,3531.41304,1.412565216,0,6478649.335,438172.2175,6480402.577,441234.4857,,,
2000,2,378,7,1,1,1,1,2,1,1,22,5/13/200,DMONSON,GLBA,L,5906.70089,2.362680356,0,6476082.43,438531.0108,6479030.899,443646.3313,439510.12,6476521.909,20001022
2000,2,379,7,0,1,0,0,0,2,1,,5/13/200,DMONSON,GLBA,L,7936.82495,3.17472998,0,6473660.235,439136.163,6477624.273,446010.6841,,,
2000,2,380,7,0,1,0,0,0,2,1,,5/13/200,DMONSON,GLBA,L,7227.66519,2.891066076,0,6471346.793,439919.2572,6474949.451,446178.4317,,,
2000,2,381,7,0,1,0,0,0,1,1,,5/13/200,DMONSON,GLBA,L,5394.13122,2.157652488,0,6469213.802,441057.1786,6471911.958,445727.4639,,,
2000,2,382,7,1,1,1,0,1,2,1,,5/13/200,DMONSON,GLBA,L,4569.7608,1.82790432,0,6466918.893,441871.9198,6469200.972,445826.6181,442294.5124,6467065.482,
2001,1,68,17,0,1,0,0,0,0,0,,6/5/01,JDOHERTY,GLBA,H,418.14824,0.167259296,0,6512521.681,440578.1796,6512738.906,440938.4122,,,
2001,2,68,15,0,1,0,0,0,0,0,,6/7/01,JDOHERTY,GLBA,H,418.14824,0.167259296,0,6512521.681,440578.1796,6512738.906,440938.4122,,,
2001,3,74,5,0,1,0,0,0,0,0,,6/9/01,JDOHERTY,GLBA,H,1034.52853,0.413811412,0,6511630.24,440612.7648,6512154.743,441518.0112,,,
2001,4,74,5,0,1,0,0,0,0,0,,6/30/200,JDOHERTY,GLBA,H,1034.52853,0.413811412,0,6511630.24,440612.7648,6512154.743,441518.0112,,,
2001,5,74,5,0,1,0,0,0,0,0,,7/1/01,JDOHERTY,GLBA,H,1034.52853,0.413811412,0,6511630.24,440612.7648,6512154.743,441518.0112,,,
2001,1,76,17,0,1,0,0,0,0,0,,6/5/01,JDOHERTY,GLBA,H,1678.94878,0.671579512,0,6505545.411,442887.2838,6506396.677,444339.3659,,,
2001,2,76,15,0,1,0,0,0,0,0,,6/7/01,JDOHERTY,GLBA,H,1678.94878,0.671579512,0,6505545.411,442887.2838,6506396.677,444339.3659,,,
2001,3,76,5,0,1,0,0,0,0,0,,6/9/01,JDOHERTY,GLBA,H,447.74468,0.179097872,0,6510383.239,438450.924,6510599.811,438840.4219,,,
2001,4,76,5,0,1,0,0,0,0,0,,6/30/200,JDOHERTY,GLBA,H,447.74468,0.179097872,0,6510383.239,438450.924,6510599.811,438840.4219,,,
2001,5,76,5,0,1,0,0,0,0,0,,7/1/01,JDOHERTY,GLBA,H,447.74468,0.179097872,0,6510383.239,438450.924,6510599.811,438840.4219,,,
2001,1,78,17,0,1,0,0,0,0,0,,6/5/01,JDOHERTY,GLBA,H,478.18256,0.191273024,0,6503352.46,429481.696,6503586.169,429901.7378,,,
2001,2,78,15,0,1,0,0,0,0,0,,6/7/01,JDOHERTY,GLBA,H,478.18256,0.191273024,0,6503352.46,429481.696,6503586.169,429901.7378,,,
2001,1,79,17,0,1,0,0,0,0,0,,6/5/01,JDOHERTY,GLBA,H,586.40825,0.2345633,0,6503349.736,424675.2753,6503636.921,425183.6909,,,
2001,2,79,15,0,1,0,0,0,0,0,,6/7/01,JDOHERTY,GLBA,H,586.40825,0.2345633,0,6503349.736,424675.2753,6503636.921,425183.6909,,,
2001,3,79,5,0,1,0,0,0,0,0,,6/9/01,JDOHERTY,GLBA,H,1018.56201,0.407424804,0,6507063.097,432717.8078,6507586.097,433605.8881,,,
2001,4,79,5,0,1,0,0,0,4,0,,6/30/200,JDOHERTY,GLBA,H,1018.56201,0.407424804,0,6507063.097,432717.8078,6507586.097,433605.8881,,,
2001,5,79,5,0,1,0,0,0,4,0,,7/2/01,JDOHERTY,GLBA,H,1018.56201,0.407424804,0,6507063.097,432717.8078,6507586.097,433605.8881,,,
2001,1,80,17,0,1,0,0,0,0,0,,6/5/01,JDOHERTY,GLBA,H,1730.47963,0.692191852,0,6501590.057,426421.4668,6502452.851,427927.4131,,,
2001,2,80,15,0,1,0,0,0,0,0,,6/7/01,JDOHERTY,GLBA,H,1730.47963,0.692191852,0,6501590.057,426421.4668,6502452.851,427927.4131,,,
2001,3,80,5,0,1,0,0,0,0,0,,6/9/01,JDOHERTY,GLBA,H,1286.76306,0.514705224,0,6506912.889,442037.9396,6507546.092,443148.4896,,,
2001,4,80,5,0,1,0,0,0,0,0,,6/30/200,JDOHERTY,GLBA,H,1286.76306,0.514705224,0,6506912.889,442037.9396,6507546.092,443148.4896,,,
2001,5,80,5,0,1,0,0,0,0,0,,7/1/01,JDOHERTY,GLBA,H,1286.76306,0.514705224,0,6506912.889,442037.9396,6507546.092,443148.4896,,,
2001,1,81,17,0,1,0,0,0,0,0,,6/5/01,JDOHERTY,GLBA,H,833.03252,0.333213008,0,6501155.131,444873.8097,6501571.857,445595.5433,,,
2001,2,81,15,0,1,0,0,0,0,0,,6/7/01,JDOHERTY,GLBA,H,833.03252,0.333213008,0,6501155.131,444873.8097,6501571.857,445595.5433,,,
2001,1,82,17,0,1,0,0,0,0,0,,6/5/01,JDOHERTY,GLBA,H,416.90721,0.166762884,0,6500784.459,429841.5839,6501000.693,430203.5023,,,
2001,2,82,15,0,1,0,0,0,0,0,,6/7/01,JDOHERTY,GLBA,H,416.90721,0.166762884,0,6500784.459,429841.5839,6501000.693,430203.5023,,,
2001,1,83,17,1,1,1,0,1,0,0,8,6/5/01,JDOHERTY,GLBA,H,518.79766,0.207519064,0,6499851.366,442619.7741,6500123.177,443068.93,442854.3085,6499981.428,20011008
2001,2,83,15,0,1,0,0,0,4,0,,6/7/01,JDOHERTY,GLBA,H,518.79766,0.207519064,0,6499851.366,442619.7741,6500123.177,443068.93,,,
2001,1,84,17,0,1,0,0,0,0,0,,6/5/01,JDOHERTY,GLBA,H,1464.57995,0.58583198,0,6499633.148,427836.4831,6500370.821,429108.2891,,,
2001,2,84,15,0,1,0,0,0,0,0,,6/7/01,JDOHERTY,GLBA,H,1464.57995,0.58583198,0,6499633.148,427836.4831,6500370.821,429108.2891,,,
2001,3,84,5,0,1,0,0,0,0,0,,6/9/01,JDOHERTY,GLBA,H,1357.03873,0.542815492,0,6504871.304,443292.9936,6505541.013,444472.0661,,,
2001,4,84,5,0,1,0,0,0,0,0,,6/30/200,JDOHERTY,GLBA,H,1357.03873,0.542815492,0,6504871.304,443292.9936,6505541.013,444472.0661,,,
2001,5,84,5,0,1,0,0,0,0,0,,7/1/01,JDOHERTY,GLBA,H,1357.03873,0.542815492,0,6504871.304,443292.9936,6505541.013,444472.0661,,,
2001,3,85,5,0,1,0,0,0,0,0,,6/9/01,JDOHERTY,GLBA,H,638.84143,0.255536572,0,6504436.43,437747.6204,6504743.103,438303.502,,,
2001,4,85,5,0,1,0,0,0,4,0,,6/30/200,JDOHERTY,GLBA,H,638.84143,0.255536572,0,6504436.43,437747.6204,6504743.103,438303.502,,,
2001,5,85,5,0,1,0,0,0,0,0,,7/2/01,JDOHERTY,GLBA,H,638.84143,0.255536572,0,6504436.43,437747.6204,6504743.103,438303.502,,,
2001,1,86,17,0,1,0,0,0,0,0,,6/5/01,JDOHERTY,GLBA,H,415.59833,0.166239332,0,6499023.994,445966.489,6499223.163,446327.3809,,,
2001,2,86,15,0,1,0,0,0,0,0,,6/7/01,JDOHERTY,GLBA,H,415.59833,0.166239332,0,6499023.994,445966.489,6499223.163,446327.3809,,,
2001,3,86,5,0,1,0,0,0,0,0,,6/9/01,JDOHERTY,GLBA,H,719.33624,0.287734496,0,6502762.965,425263.6078,6503122.235,425889.4839,,,
2001,4,86,5,0,1,0,0,0,0,0,,6/30/200,JDOHERTY,GLBA,H,719.33624,0.287734496,0,6502762.965,425263.6078,6503122.235,425889.4839,,,
2001,5,86,5,0,1,0,0,0,4,0,,7/1/01,JDOHERTY,GLBA,H,719.33624,0.287734496,0,6502762.965,425263.6078,6503122.235,425889.4839,,,
2001,3,87,5,0,1,0,0,0,0,0,,6/9/01,JDOHERTY,GLBA,H,424.47461,0.169789844,0,6502406.654,429435.5352,6502604.294,429796.9955,,,
2001,4,87,5,0,1,0,0,0,3,0,,6/30/200,JDOHERTY,GLBA,H,424.47461,0.169789844,0,6502406.654,429435.5352,6502604.294,429796.9955,,,
2001,5,87,5,0,1,0,0,0,0,0,,7/1/01,JDOHERTY,GLBA,H,424.47461,0.169789844,0,6502406.654,429435.5352,6502604.294,429796.9955,,,
2001,1,88,17,0,1,0,0,0,0,0,,6/5/01,JDOHERTY,GLBA,H,506.40298,0.202561192,0,6496910.942,447118.7465,6497164.845,447557.9788,,,
2001,2,88,15,0,1,0,0,0,0,0,,6/7/01,JDOHERTY,GLBA,H,506.40298,0.202561192,0,6496910.942,447118.7465,6497164.845,447557.9788,,,
2001,1,89,17,0,1,0,0,0,4,0,,6/5/01,JDOHERTY,GLBA,H,1658.1059,0.66324236,0,6496506.664,441630.9446,6497339.197,443066.9799,,,
2001,2,89,15,1,1,1,1,2,0,0,31,6/7/01,JDOHERTY,GLBA,H,1658.1059,0.66324236,0,6496506.664,441630.9446,6497339.197,443066.9799,442418.273,6496372.056,20011031
2001,3,89,5,0,1,0,0,0,0,0,,6/9/01,JDOHERTY,GLBA,H,1702.49201,0.680996804,0,6500841.461,426746.0153,6501705.095,428213.4832,,,
2001,4,89,5,0,1,0,0,0,4,0,,6/30/200,JDOHERTY,GLBA,H,1702.49201,0.680996804,0,6500841.461,426746.0153,6501705.095,428213.4832,,,
2001,5,89,5,0,1,0,0,0,4,0,,7/1/01,JDOHERTY,GLBA,H,1702.49201,0.680996804,0,6500841.461,426746.0153,6501705.095,428213.4832,,,
2001,1,90,17,0,1,0,0,0,0,0,,6/5/01,JDOHERTY,GLBA,H,417.74129,0.167096516,0,6495857.323,435711.4284,6496074.102,436073.4542,,,
2001,2,90,15,0,1,0,0,0,2,0,,6/7/01,JDOHERTY,GLBA,H,417.74129,0.167096516,0,6495857.323,435711.4284,6496074.102,436073.4542,,,
2001,3,90,5,0,1,0,0,0,0,0,,6/9/01,JDOHERTY,GLBA,H,556.43243,0.222572972,0,6500679.94,445670.1597,6500970.257,446148.2787,,,
2001,4,90,5,0,1,0,0,0,0,0,,6/30/200,JDOHERTY,GLBA,H,556.43243,0.222572972,0,6500679.94,445670.1597,6500970.257,446148.2787,,,
2001,5,90,5,0,1,0,0,0,0,0,,7/1/01,JDOHERTY,GLBA,H,556.43243,0.222572972,0,6500679.94,445670.1597,6500970.257,446148.2787,,,
2001,1,92,17,0,1,0,0,0,0,0,,6/5/01,JDOHERTY,GLBA,H,5071.63156,2.028652624,0,6494983.081,429378.5159,6497504.726,433762.9476,,,
2001,2,92,15,0,1,0,0,0,3,0,,6/7/01,JDOHERTY,GLBA,H,5071.63156,2.028652624,0,6494983.081,429378.5159,6497504.726,433762.9476,,,
2001,1,93,17,0,1,0,0,0,3,0,,6/5/01,JDOHERTY,GLBA,H,5229.92787,2.091971148,0,6493818.791,446582.4987,6496450.641,451103.0681,,,
2001,2,93,15,0,1,0,0,0,0,0,,6/7/01,JDOHERTY,GLBA,H,5229.92787,2.091971148,0,6493818.791,446582.4987,6496450.641,451103.0681,,,
2001,3,93,5,0,1,0,0,0,0,0,,6/9/01,JDOHERTY,GLBA,H,482.91405,0.19316562,0,6498476.659,446626.8899,6498712.344,447036.6943,,,
2001,4,93,5,0,1,0,0,0,0,0,,6/30/200,JDOHERTY,GLBA,H,482.91405,0.19316562,0,6498476.659,446626.8899,6498712.344,447036.6943,,,
2001,5,93,5,0,1,0,0,0,0,0,,7/1/01,JDOHERTY,GLBA,H,482.91405,0.19316562,0,6498476.659,446626.8899,6498712.344,447036.6943,,,
2001,1,94,17,0,1,0,0,0,0,0,,6/5/01,JDOHERTY,GLBA,H,549.28998,0.219715992,0,6493525.168,436448.5357,6493795.959,436918.2315,,,
2001,2,94,15,0,1,0,0,0,4,0,,6/7/01,JDOHERTY,GLBA,H,549.28998,0.219715992,0,6493525.168,436448.5357,6493795.959,436918.2315,,,
2001,3,94,5,0,1,0,0,0,0,0,,6/9/01,JDOHERTY,GLBA,H,1972.00292,0.788801168,0,6497234.971,430077.9005,6498225.507,431790.2031,,,
2001,4,94,5,0,1,0,0,0,4,0,,6/30/200,JDOHERTY,GLBA,H,1972.00292,0.788801168,0,6497234.971,430077.9005,6498225.507,431790.2031,,,
2001,5,94,5,0,1,0,0,0,4,0,,7/1/01,JDOHERTY,GLBA,H,1972.00292,0.788801168,0,6497234.971,430077.9005,6498225.507,431790.2031,,,
2001,1,95,17,0,1,0,0,0,0,0,,6/5/01,JDOHERTY,GLBA,H,3553.47726,1.421390904,0,6492883.494,430533.1823,6494648.977,433607.827,,,
2001,2,95,15,0,1,0,0,0,4,0,,6/7/01,JDOHERTY,GLBA,H,3553.47726,1.421390904,0,6492883.494,430533.1823,6494648.977,433607.827,,,
2001,1,96,17,0,1,0,0,0,0,0,,6/5/01,JDOHERTY,GLBA,H,2400.28663,0.960114652,0,6491522.535,433001.7763,6492731.046,435078.1374,,,
2001,2,96,15,0,1,0,0,0,4,0,,6/7/01,JDOHERTY,GLBA,H,2400.28663,0.960114652,0,6491522.535,433001.7763,6492731.046,435078.1374,,,
2001,3,96,5,0,1,0,0,0,0,0,,6/9/01,JDOHERTY,GLBA,H,420.28381,0.168113524,0,6496425.057,428678.0344,6496622.631,429040.0762,,,
2001,4,96,5,0,1,0,0,0,0,0,,6/30/200,JDOHERTY,GLBA,H,420.28381,0.168113524,0,6496425.057,428678.0344,6496622.631,429040.0762,,,
2001,5,96,5,0,1,0,0,0,0,0,,7/1/01,JDOHERTY,GLBA,H,420.28381,0.168113524,0,6496425.057,428678.0344,6496622.631,429040.0762,,,
2001,1,97,17,1,1,7,0,7,0,0,,6/5/01,JDOHERTY,GLBA,H,6196.79923,2.478719692,0,6490161.499,440245.6252,6493275.49,445605.6695,441928.8837,6491117.152,
2001,1,97,17,3,1,56,21,77,0,0,,6/5/01,JDOHERTY,GLBA,H,6196.79923,2.478719692,1,6490161.499,440245.6252,6493275.49,445605.6695,440521.3015,6490314.957,
2001,1,97,17,4,1,104,5,109,0,0,,6/5/01,JDOHERTY,GLBA,H,6196.79923,2.478719692,1,6490161.499,440245.6252,6493275.49,445605.6695,441108.381,6490631.52,
2001,1,97,17,5,1,21,1,22,0,0,,6/5/01,JDOHERTY,GLBA,H,6196.79923,2.478719692,1,6490161.499,440245.6252,6493275.49,445605.6695,441557.3241,6490896.281,
2001,1,97,17,2,1,2,0,2,0,0,11,6/5/01,JDOHERTY,GLBA,H,6196.79923,2.478719692,0,6490161.499,440245.6252,6493275.49,445605.6695,442182.4894,6491255.483,20012011
2001,2,97,15,1,1,1,1,2,0,0,28,6/7/01,JDOHERTY,GLBA,H,6196.79923,2.478719692,0,6490161.499,440245.6252,6493275.49,445605.6695,440654.5776,6489994.879,20011028
2001,2,97,15,2,1,1,0,1,0,0,28,6/7/01,JDOHERTY,GLBA,H,6196.79923,2.478719692,0,6490161.499,440245.6252,6493275.49,445605.6695,440625.7433,6489889.154,20012028
2001,1,98,17,0,1,0,0,0,0,0,,6/5/01,JDOHERTY,GLBA,H,1809.25221,0.723700884,0,6489412.86,448511.422,6490320.534,450075.5415,,,
2001,2,98,15,1,1,1,0,1,0,0,24,6/7/01,JDOHERTY,GLBA,H,1809.25221,0.723700884,0,6489412.86,448511.422,6490320.534,450075.5415,448910.7868,6489168.297,20011024
2001,2,98,15,2,1,1,0,1,0,0,,6/7/01,JDOHERTY,GLBA,H,1809.25221,0.723700884,0,6489412.86,448511.422,6490320.534,450075.5415,450006.4894,6489648.868,
2001,3,98,5,0,1,0,0,0,0,0,,6/9/01,JDOHERTY,GLBA,H,409.0819,0.16363276,0,6495164.239,436097.3038,6495362.655,436449.3807,,,
2001,4,98,5,0,1,0,0,0,4,0,,6/30/200,JDOHERTY,GLBA,H,409.0819,0.16363276,0,6495164.239,436097.3038,6495362.655,436449.3807,,,
2001,5,98,5,0,1,0,0,0,4,0,,7/2/01,JDOHERTY,GLBA,H,409.0819,0.16363276,0,6495164.239,436097.3038,6495362.655,436449.3807,,,
2001,1,99,17,0,1,0,0,0,0,0,,6/5/01,JDOHERTY,GLBA,H,730.55599,0.292222396,0,6488991.537,433395.1365,6489351.954,434032.088,,,
2001,2,99,15,0,1,0,0,0,2,0,,6/7/01,JDOHERTY,GLBA,H,730.55599,0.292222396,0,6488991.537,433395.1365,6489351.954,434032.088,,,
2001,3,99,5,0,1,0,0,0,0,0,,6/9/01,JDOHERTY,GLBA,H,2904.23215,1.16169286,0,6495058.361,445523.9243,6496508.894,448033.4464,,,
2001,4,99,5,0,1,0,0,0,4,0,,6/30/200,JDOHERTY,GLBA,H,2904.23215,1.16169286,0,6495058.361,445523.9243,6496508.894,448033.4464,,,
2001,5,99,5,0,1,0,0,0,4,0,,7/1/01,JDOHERTY,GLBA,H,2904.23215,1.16169286,0,6495058.361,445523.9243,6496508.894,448033.4464,,,
2001,1,100,17,0,1,0,0,0,0,0,,6/5/01,JDOHERTY,GLBA,H,677.13299,0.270853196,0,6487318.667,449707.1154,6487663.914,450284.2997,,,
2001,2,100,15,0,1,0,0,0,0,0,,6/7/01,JDOHERTY,GLBA,H,677.13299,0.270853196,0,6487318.667,449707.1154,6487663.914,450284.2997,,,
2001,3,100,5,0,1,0,0,0,0,0,,6/9/01,JDOHERTY,GLBA,H,2974.03285,1.18961314,0,6494685.263,430458.626,6496162.242,433032.9207,,,
2001,4,100,5,0,1,0,0,0,4,0,,6/30/200,JDOHERTY,GLBA,H,2974.03285,1.18961314,0,6494685.263,430458.626,6496162.242,433032.9207,,,
2001,5,100,5,0,1,0,0,0,4,0,,7/1/01,JDOHERTY,GLBA,H,2974.03285,1.18961314,0,6494685.263,430458.626,6496162.242,433032.9207,,,
2001,1,101,17,0,1,0,0,0,0,0,,6/5/01,JDOHERTY,GLBA,H,953.43021,0.381372084,0,6484758.871,435664.6408,6485227.993,436488.3914,,,
2001,2,101,15,0,1,0,0,0,1,0,,6/7/01,JDOHERTY,GLBA,H,953.43021,0.381372084,0,6484758.871,435664.6408,6485227.993,436488.3914,,,
2001,3,101,5,0,1,0,0,0,0,0,,6/9/01,JDOHERTY,GLBA,H,1269.85944,0.507943776,0,6494251.564,448914.3564,6494886.855,450017.6069,,,
2001,4,101,5,0,1,0,0,0,4,0,,6/30/200,JDOHERTY,GLBA,H,1269.85944,0.507943776,0,6494251.564,448914.3564,6494886.855,450017.6069,,,
2001,5,101,5,0,1,0,0,0,0,0,,7/1/01,JDOHERTY,GLBA,H,1269.85944,0.507943776,0,6494251.564,448914.3564,6494886.855,450017.6069,,,
2001,1,102,17,1,1,1,0,1,0,0,16,6/5/01,JDOHERTY,GLBA,H,8734.07931,3.493631724,0,6484702.866,440375.9432,6489067.875,447934.3298,447104.7424,6488563.806,20011016
2001,2,102,15,1,1,1,0,1,0,0,23,6/7/01,JDOHERTY,GLBA,H,8734.07931,3.493631724,0,6484702.866,440375.9432,6489067.875,447934.3298,444297.3063,6486534.768,20011023
2001,2,102,15,2,1,1,0,1,0,0,,6/7/01,JDOHERTY,GLBA,H,8734.07931,3.493631724,0,6484702.866,440375.9432,6489067.875,447934.3298,444729.8205,6486630.883,
2001,3,102,5,0,1,0,0,0,0,0,,6/9/01,JDOHERTY,GLBA,H,2928.86322,1.171545288,0,6493392.586,442611.9083,6494840.845,445152.6628,,,
2001,4,102,5,0,1,0,0,0,2,0,,6/30/200,JDOHERTY,GLBA,H,2928.86322,1.171545288,0,6493392.586,442611.9083,6494840.845,445152.6628,,,
2001,5,102,5,0,1,0,0,0,4,3,,7/1/01,JDOHERTY,GLBA,H,2928.86322,1.171545288,0,6493392.586,442611.9083,6494840.845,445152.6628,,,
2001,1,103,17,0,1,0,0,0,0,0,,6/5/01,JDOHERTY,GLBA,H,866.79941,0.346719764,0,6483276.246,442696.5375,6483710.712,443451.1721,,,
2001,2,103,15,0,1,0,0,0,0,0,,6/7/01,JDOHERTY,GLBA,H,866.79941,0.346719764,0,6483276.246,442696.5375,6483710.712,443451.1721,,,
2001,3,103,5,0,1,0,0,0,0,0,,6/9/01,JDOHERTY,GLBA,H,1149.89475,0.4599579,0,6493181.15,447068.174,6493761.671,448064.6921,,,
2001,4,103,5,0,1,0,0,0,4,0,,6/30/200,JDOHERTY,GLBA,H,1149.89475,0.4599579,0,6493181.15,447068.174,6493761.671,448064.6921,,,
2001,5,103,5,0,1,0,0,0,0,0,,7/1/01,JDOHERTY,GLBA,H,1149.89475,0.4599579,0,6493181.15,447068.174,6493761.671,448064.6921,,,
2001,1,104,17,0,1,0,0,0,0,0,,6/5/01,JDOHERTY,GLBA,H,882.15169,0.352860676,0,6482244.986,440902.3895,6482678.964,441667.1431,,,
2001,2,104,15,0,1,0,0,0,0,0,,6/7/01,JDOHERTY,GLBA,H,882.15169,0.352860676,0,6482244.986,440902.3895,6482678.964,441667.1431,,,
2001,3,104,5,0,1,0,0,0,0,0,,6/9/01,JDOHERTY,GLBA,H,441.98036,0.176792144,0,6492759.35,436746.3442,6492975.913,437127.9767,,,
2001,4,104,5,0,1,0,0,0,0,0,,6/30/200,JDOHERTY,GLBA,H,441.98036,0.176792144,0,6492759.35,436746.3442,6492975.913,437127.9767,,,
2001,5,104,5,0,1,0,0,0,3,0,,7/1/01,JDOHERTY,GLBA,H,441.98036,0.176792144,0,6492759.35,436746.3442,6492975.913,437127.9767,,,
2001,1,105,17,0,1,0,0,0,0,0,,6/5/01,JDOHERTY,GLBA,H,1410.59687,0.564238748,0,6481905.046,445136.2352,6482612.039,446351.4639,,,
2001,2,105,15,0,1,0,0,0,0,0,,6/7/01,JDOHERTY,GLBA,H,1410.59687,0.564238748,0,6481905.046,445136.2352,6482612.039,446351.4639,,,
2001,3,105,5,0,1,0,0,0,0,0,,6/9/01,JDOHERTY,GLBA,H,711.38621,0.284554484,0,6492107.932,440401.45,6492469.778,441017.8451,,,
2001,4,105,5,0,1,0,0,0,2,0,,6/30/200,JDOHERTY,GLBA,H,711.38621,0.284554484,0,6492107.932,440401.45,6492469.778,441017.8451,,,
2001,5,105,5,0,1,0,0,0,4,4,,7/1/01,JDOHERTY,GLBA,H,711.38621,0.284554484,0,6492107.932,440401.45,6492469.778,441017.8451,,,
2001,1,106,17,0,1,0,0,0,0,0,,6/5/01,JDOHERTY,GLBA,H,788.40399,0.315361596,0,6481575.892,439744.9326,6481955.16,440431.34,,,
2001,2,106,15,0,1,0,0,0,0,0,,6/7/01,JDOHERTY,GLBA,H,788.40399,0.315361596,0,6481575.892,439744.9326,6481955.16,440431.34,,,
2001,3,106,5,0,1,0,0,0,0,0,,6/9/01,JDOHERTY,GLBA,H,2360.94188,0.944376752,0,6490829.185,433387.6353,6492001.271,435434.5332,,,
2001,4,106,5,0,1,0,0,0,0,0,,6/30/200,JDOHERTY,GLBA,H,2360.94188,0.944376752,0,6490829.185,433387.6353,6492001.271,435434.5332,,,
2001,5,106,5,0,1,0,0,0,4,0,,7/1/01,JDOHERTY,GLBA,H,2360.94188,0.944376752,0,6490829.185,433387.6353,6492001.271,435434.5332,,,
2001,1,107,17,0,1,0,0,0,0,0,,6/5/01,JDOHERTY,GLBA,H,535.38176,0.214152704,0,6480293.489,442331.9475,6480565.131,442793.0524,,,
2001,2,107,15,0,1,0,0,0,0,0,,6/7/01,JDOHERTY,GLBA,H,535.38176,0.214152704,0,6480293.489,442331.9475,6480565.131,442793.0524,,,
2001,3,107,5,0,1,0,0,0,0,0,,6/9/01,JDOHERTY,GLBA,H,2205.45927,0.882183708,0,6488648.364,448782.8058,6489737.289,450698.7471,,,
2001,4,107,5,0,1,0,0,0,1,0,,6/30/200,JDOHERTY,GLBA,H,2205.45927,0.882183708,0,6488648.364,448782.8058,6489737.289,450698.7471,,,
2001,5,107,5,0,1,0,0,0,4,0,,7/1/01,JDOHERTY,GLBA,H,2205.45927,0.882183708,0,6488648.364,448782.8058,6489737.289,450698.7471,,,
2001,1,108,17,0,1,0,0,0,0,0,,6/5/01,JDOHERTY,GLBA,H,2228.51585,0.89140634,0,6479696.752,436505.7077,6480798.245,438429.764,,,
2001,2,108,15,0,1,0,0,0,0,0,,6/7/01,JDOHERTY,GLBA,H,2228.51585,0.89140634,0,6479696.752,436505.7077,6480798.245,438429.764,,,
2001,3,108,5,0,1,0,0,0,0,0,,6/9/01,JDOHERTY,GLBA,H,2643.7769,1.05751076,0,6487408.647,441873.4835,6488730.279,444154.4981,,,
2001,4,108,5,0,1,0,0,0,2,0,,6/30/200,JDOHERTY,GLBA,H,2643.7769,1.05751076,0,6487408.647,441873.4835,6488730.279,444154.4981,,,
2001,5,108,5,0,1,0,0,0,4,0,,7/1/01,JDOHERTY,GLBA,H,2643.7769,1.05751076,0,6487408.647,441873.4835,6488730.279,444154.4981,,,
2001,1,109,17,0,1,0,0,0,0,0,,6/5/01,JDOHERTY,GLBA,H,1623.66512,0.649466048,0,6476881.644,446029.6756,6477697.771,447432.6448,,,
2001,2,109,15,0,1,0,0,0,3,0,,6/7/01,JDOHERTY,GLBA,H,1623.66512,0.649466048,0,6476881.644,446029.6756,6477697.771,447432.6448,,,
2001,3,109,5,0,1,0,0,0,0,0,,6/9/01,JDOHERTY,GLBA,H,914.70602,0.365882408,0,6486517.768,449929.871,6486971.566,450731.8365,,,
2001,4,109,5,0,1,0,0,0,4,0,,6/30/200,JDOHERTY,GLBA,H,914.70602,0.365882408,0,6486517.768,449929.871,6486971.566,450731.8365,,,
2001,5,109,5,0,1,0,0,0,4,0,,7/1/01,JDOHERTY,GLBA,H,914.70602,0.365882408,0,6486517.768,449929.871,6486971.566,450731.8365,,,
2001,1,110,17,0,1,0,0,0,0,0,,6/5/01,JDOHERTY,GLBA,H,507.72523,0.203090092,0,6475177.188,438263.6183,6475430.103,438705.8407,,,
2001,2,110,15,0,1,0,0,0,0,0,,6/7/01,JDOHERTY,GLBA,H,507.72523,0.203090092,0,6475177.188,438263.6183,6475430.103,438705.8407,,,
2001,3,110,5,0,1,0,0,0,0,0,,6/9/01,JDOHERTY,GLBA,H,583.29729,0.233318916,0,6486452.372,435391.3979,6486740.958,435901.139,,,
2001,4,110,5,0,1,0,0,0,0,0,,6/30/200,JDOHERTY,GLBA,H,583.29729,0.233318916,0,6486452.372,435391.3979,6486740.958,435901.139,,,
2001,5,110,5,0,1,0,0,0,0,0,,7/1/01,JDOHERTY,GLBA,H,583.29729,0.233318916,0,6486452.372,435391.3979,6486740.958,435901.139,,,
2001,1,111,17,0,1,0,0,0,0,0,,6/5/01,JDOHERTY,GLBA,H,1304.68222,0.521872888,0,6474224.982,446226.9564,6474877.823,447355.9321,,,
2001,2,111,15,0,1,0,0,0,0,0,,6/7/01,JDOHERTY,GLBA,H,1304.68222,0.521872888,0,6474224.982,446226.9564,6474877.823,447355.9321,,,
2001,3,111,5,0,1,0,0,0,0,0,,6/9/01,JDOHERTY,GLBA,H,4754.0229,1.90160916,0,6486189.887,430142.1813,6488568.541,434261.5383,,,
2001,4,111,5,0,1,0,0,0,0,0,,6/30/200,JDOHERTY,GLBA,H,4754.0229,1.90160916,0,6486189.887,430142.1813,6488568.541,434261.5383,,,
2001,5,111,5,0,1,0,0,0,0,0,,7/1/01,JDOHERTY,GLBA,H,4754.0229,1.90160916,0,6486189.887,430142.1813,6488568.541,434261.5383,,,
2001,1,112,17,0,1,0,0,0,0,0,,6/5/01,JDOHERTY,GLBA,H,542.37704,0.216950816,0,6472610.154,438632.6162,6472881.214,439104.6124,,,
2001,2,112,15,0,1,0,0,0,0,0,,6/7/01,JDOHERTY,GLBA,H,542.37704,0.216950816,0,6472610.154,438632.6162,6472881.214,439104.6124,,,
2001,3,112,5,0,1,0,0,0,0,0,,6/9/01,JDOHERTY,GLBA,H,579.75404,0.231901616,0,6486160.616,439718.2905,6486468.468,440218.3114,,,
2001,4,112,5,0,1,0,0,0,0,0,,6/30/200,JDOHERTY,GLBA,H,579.75404,0.231901616,0,6486160.616,439718.2905,6486468.468,440218.3114,,,
2001,5,112,5,0,1,0,0,0,0,0,,7/1/01,JDOHERTY,GLBA,H,579.75404,0.231901616,0,6486160.616,439718.2905,6486468.468,440218.3114,,,
2001,1,113,17,1,1,1,0,1,0,0,19,6/5/01,JDOHERTY,GLBA,H,850.42248,0.340168992,0,6471024.662,445471.4944,6471441.377,446208.3765,445847.0372,6471213.534,20011019
2001,2,113,15,4,1,1,0,1,2,0,,6/7/01,JDOHERTY,GLBA,H,850.42248,0.340168992,0,6471024.662,445471.4944,6471441.377,446208.3765,445948.5477,6471434.287,
2001,2,113,15,1,1,1,0,1,2,0,39,6/7/01,JDOHERTY,GLBA,H,850.42248,0.340168992,0,6471024.662,445471.4944,6471441.377,446208.3765,445718.2784,6471242.396,20011039
2001,2,113,15,2,1,1,0,1,2,0,39,6/7/01,JDOHERTY,GLBA,H,850.42248,0.340168992,0,6471024.662,445471.4944,6471441.377,446208.3765,445844.3782,6471198.535,20012039
2001,2,113,15,3,1,1,0,1,2,0,39,6/7/01,JDOHERTY,GLBA,H,850.42248,0.340168992,0,6471024.662,445471.4944,6471441.377,446208.3765,445986.9257,6471182.087,20013039
2001,3,113,5,0,1,0,0,0,0,0,,6/9/01,JDOHERTY,GLBA,H,1004.84893,0.401939572,0,6485537.85,448217.5749,6486027.526,449088.3962,,,
2001,4,113,5,0,1,0,0,0,0,0,,6/30/200,JDOHERTY,GLBA,H,1004.84893,0.401939572,0,6485537.85,448217.5749,6486027.526,449088.3962,,,
2001,5,113,5,0,1,0,0,0,4,0,,7/1/01,JDOHERTY,GLBA,H,1004.84893,0.401939572,0,6485537.85,448217.5749,6486027.526,449088.3962,,,
2001,1,114,17,1,1,1,0,1,0,0,17,6/5/01,JDOHERTY,GLBA,H,3465.57778,1.386231112,0,6469067.844,437289.7363,6470802.904,440291.2089,439530.2412,6470319.562,20011017
2001,1,114,17,2,1,1,0,1,0,0,17,6/5/01,JDOHERTY,GLBA,H,3465.57778,1.386231112,0,6469067.844,437289.7363,6470802.904,440291.2089,439623.0239,6470461.829,20012017
2001,1,114,17,3,1,1,0,1,0,0,17,6/5/01,JDOHERTY,GLBA,H,3465.57778,1.386231112,0,6469067.844,437289.7363,6470802.904,440291.2089,439709.6209,6470350.49,20013017
2001,2,114,15,0,1,0,0,0,1,0,,6/7/01,JDOHERTY,GLBA,H,3465.57778,1.386231112,0,6469067.844,437289.7363,6470802.904,440291.2089,,,
2001,3,114,5,0,1,0,0,0,0,0,,6/9/01,JDOHERTY,GLBA,H,850.99632,0.340398528,0,6483812.705,435639.379,6484246.132,436375.2934,,,
2001,4,114,5,0,1,0,0,0,0,0,,6/30/200,JDOHERTY,GLBA,H,850.99632,0.340398528,0,6483812.705,435639.379,6484246.132,436375.2934,,,
2001,5,114,5,1,1,1,0,1,0,0,93,7/1/01,JDOHERTY,GLBA,H,850.99632,0.340398528,0,6483812.705,435639.379,6484246.132,436375.2934,436038.8457,6483570.452,20011093
2001,1,115,17,2,1,1,0,1,1,0,,6/5/01,JDOHERTY,GLBA,H,5986.95207,2.394780828,0,6468530.831,445973.4829,6471525.246,451161.3386,447917.7854,6469639.157,
2001,1,115,17,1,1,1,0,1,1,0,21,6/5/01,JDOHERTY,GLBA,H,5986.95207,2.394780828,0,6468530.831,445973.4829,6471525.246,451161.3386,449600.2434,6470604.095,20011021
2001,2,115,15,1,1,1,0,1,3,0,41,6/7/01,JDOHERTY,GLBA,H,5986.95207,2.394780828,0,6468530.831,445973.4829,6471525.246,451161.3386,448996.8756,6470288.423,20011041
2001,3,115,5,0,1,0,0,0,1,0,,6/9/01,JDOHERTY,GLBA,H,9427.13133,3.770852532,0,6483286.744,439528.2471,6488013.158,447697.028,,,
2001,4,115,5,0,1,0,0,0,2,0,,6/30/200,JDOHERTY,GLBA,H,9427.13133,3.770852532,0,6483286.744,439528.2471,6488013.158,447697.028,,,
2001,5,115,5,0,1,0,0,0,4,0,,7/1/01,JDOHERTY,GLBA,H,9427.13133,3.770852532,0,6483286.744,439528.2471,6488013.158,447697.028,,,
2001,1,116,17,0,1,0,0,0,0,0,,6/5/01,JDOHERTY,GLBA,H,1067.76717,0.427106868,0,6468273.245,435920.8935,6468815.087,436846.7193,,,
2001,2,116,15,0,1,0,0,0,0,0,,6/7/01,JDOHERTY,GLBA,H,1067.76717,0.427106868,0,6468273.245,435920.8935,6468815.087,436846.7193,,,
2001,3,116,5,0,1,0,0,0,0,0,,6/9/01,JDOHERTY,GLBA,H,460.43919,0.184175676,0,6483181.393,444123.8746,6483398.401,444525.4316,,,
2001,4,116,5,0,1,0,0,0,0,0,,6/30/200,JDOHERTY,GLBA,H,460.43919,0.184175676,0,6483181.393,444123.8746,6483398.401,444525.4316,,,
2001,5,116,5,0,1,0,0,0,2,0,,7/1/01,JDOHERTY,GLBA,H,460.43919,0.184175676,0,6483181.393,444123.8746,6483398.401,444525.4316,,,
2001,1,117,17,0,1,0,0,0,4,0,,6/5/01,JDOHERTY,GLBA,H,1717.49126,0.686996504,0,6467729.714,439785.9714,6468598.127,441272.3396,,,
2001,2,117,15,0,1,0,0,0,4,0,,6/7/01,JDOHERTY,GLBA,H,1717.49126,0.686996504,0,6467729.714,439785.9714,6468598.127,441272.3396,,,
2001,3,117,5,0,1,0,0,0,0,0,,6/9/01,JDOHERTY,GLBA,H,575.8041,0.23032164,0,6482826.628,448337.2345,6483117.021,448836.7295,,,
2001,4,117,5,0,1,0,0,0,0,0,,6/30/200,JDOHERTY,GLBA,H,575.8041,0.23032164,0,6482826.628,448337.2345,6483117.021,448836.7295,,,
2001,5,117,5,0,1,0,0,0,4,0,,7/1/01,JDOHERTY,GLBA,H,575.8041,0.23032164,0,6482826.628,448337.2345,6483117.021,448836.7295,,,
2001,3,118,5,0,1,0,0,0,0,0,,6/9/01,JDOHERTY,GLBA,H,485.01766,0.194007064,0,6482065.06,446995.3312,6482300.657,447416.5233,,,
2001,4,118,5,0,1,0,0,0,0,0,,6/30/200,JDOHERTY,GLBA,H,485.01766,0.194007064,0,6482065.06,446995.3312,6482300.657,447416.5233,,,
2001,5,118,5,0,1,0,0,0,4,0,,7/1/01,JDOHERTY,GLBA,H,485.01766,0.194007064,0,6482065.06,446995.3312,6482300.657,447416.5233,,,
2001,1,119,17,0,1,0,0,0,4,0,,6/5/01,JDOHERTY,GLBA,H,678.46475,0.2713859,0,6466230.767,441969.1442,6466556.327,442549.8062,,,
2001,2,119,15,0,1,0,0,0,4,0,,6/7/01,JDOHERTY,GLBA,H,678.46475,0.2713859,0,6466230.767,441969.1442,6466556.327,442549.8062,,,
2001,3,119,5,0,1,0,0,0,0,0,,6/9/01,JDOHERTY,GLBA,H,917.64131,0.367056524,0,6481624.623,436653.597,6482094.42,437448.709,,,
2001,4,119,5,4,1,1,1,2,2,0,,6/30/200,JDOHERTY,GLBA,H,917.64131,0.367056524,0,6481624.623,436653.597,6482094.42,437448.709,436880.2134,6481830.533,
2001,4,119,5,5,1,1,1,2,2,0,,6/30/200,JDOHERTY,GLBA,H,917.64131,0.367056524,0,6481624.623,436653.597,6482094.42,437448.709,436790.9102,6481639.169,
2001,4,119,5,1,1,1,1,2,2,0,69,6/30/200,JDOHERTY,GLBA,H,917.64131,0.367056524,0,6481624.623,436653.597,6482094.42,437448.709,437190.6483,6482009.14,20011069
2001,4,119,5,2,1,1,1,2,2,0,69,6/30/200,JDOHERTY,GLBA,H,917.64131,0.367056524,0,6481624.623,436653.597,6482094.42,437448.709,437339.4869,6481941.099,20012069
2001,4,119,5,3,1,1,1,2,2,0,69,6/30/200,JDOHERTY,GLBA,H,917.64131,0.367056524,0,6481624.623,436653.597,6482094.42,437448.709,437186.3955,6481873.059,20013069
2001,5,119,5,0,1,0,0,0,0,0,,7/1/01,JDOHERTY,GLBA,H,917.64131,0.367056524,0,6481624.623,436653.597,6482094.42,437448.709,,,
2001,1,120,17,0,1,0,0,0,2,0,,6/5/01,JDOHERTY,GLBA,H,1755.66661,0.702266644,0,6466146.161,446643.5788,6467035.195,448168.241,,,
2001,2,120,15,0,1,0,0,0,4,0,,6/7/01,JDOHERTY,GLBA,H,1755.66661,0.702266644,0,6466146.161,446643.5788,6467035.195,448168.241,,,
2001,3,120,5,0,1,0,0,0,0,0,,6/9/01,JDOHERTY,GLBA,H,636.14359,0.254457436,0,6481176.353,445485.826,6481502.826,446034.8628,,,
2001,4,120,5,0,1,0,0,0,0,0,,6/30/200,JDOHERTY,GLBA,H,636.14359,0.254457436,0,6481176.353,445485.826,6481502.826,446034.8628,,,
2001,5,120,5,0,1,0,0,0,4,0,,7/1/01,JDOHERTY,GLBA,H,636.14359,0.254457436,0,6481176.353,445485.826,6481502.826,446034.8628,,,
2001,3,121,5,1,1,1,0,1,0,0,48,6/9/01,JDOHERTY,GLBA,H,1923.30754,0.769323016,0,6480918.711,440240.539,6481896.018,441898.5527,440474.1408,6481059.937,20011048
2001,4,121,5,0,1,0,0,0,0,0,,6/30/200,JDOHERTY,GLBA,H,1923.30754,0.769323016,0,6480918.711,440240.539,6481896.018,441898.5527,,,
2001,5,121,5,0,1,0,0,0,0,0,,7/1/01,JDOHERTY,GLBA,H,1923.30754,0.769323016,0,6480918.711,440240.539,6481896.018,441898.5527,,,
2001,3,122,5,0,1,0,0,0,0,0,,6/9/01,JDOHERTY,GLBA,H,777.81581,0.311126324,0,6479745.851,442975.6576,6480125.823,443652.3298,,,
2001,4,122,5,0,1,0,0,0,0,0,,6/30/200,JDOHERTY,GLBA,H,777.81581,0.311126324,0,6479745.851,442975.6576,6480125.823,443652.3298,,,
2001,5,122,5,0,1,0,0,0,0,0,,7/1/01,JDOHERTY,GLBA,H,777.81581,0.311126324,0,6479745.851,442975.6576,6480125.823,443652.3298,,,
2001,3,123,5,0,1,0,0,0,0,0,,6/9/01,JDOHERTY,GLBA,H,1878.28782,0.751315128,0,6478822.765,436608.3306,6479762.046,438228.6611,,,
2001,4,123,5,0,1,0,0,0,0,0,,6/30/200,JDOHERTY,GLBA,H,1878.28782,0.751315128,0,6478822.765,436608.3306,6479762.046,438228.6611,,,
2001,5,123,5,1,1,1,1,2,0,0,86,7/1/01,JDOHERTY,GLBA,H,1878.28782,0.751315128,0,6478822.765,436608.3306,6479762.046,438228.6611,437234.4751,6478734.796,20011086
2001,3,124,5,0,1,0,0,0,0,0,,6/9/01,JDOHERTY,GLBA,H,452.61711,0.181046844,0,6476834.287,437929.4464,6477050.817,438322.2636,,,
2001,4,124,5,0,1,0,0,0,0,0,,6/30/200,JDOHERTY,GLBA,H,452.61711,0.181046844,0,6476834.287,437929.4464,6477050.817,438322.2636,,,
2001,5,124,5,0,1,0,0,0,0,0,,7/1/01,JDOHERTY,GLBA,H,452.61711,0.181046844,0,6476834.287,437929.4464,6477050.817,438322.2636,,,
2001,3,125,5,0,1,0,0,0,0,0,,6/9/01,JDOHERTY,GLBA,H,1243.93662,0.497574648,0,6475972.016,446046.3851,6476588.347,447125.733,,,
2001,4,125,5,0,1,0,0,0,0,0,,6/30/200,JDOHERTY,GLBA,H,1243.93662,0.497574648,0,6475972.016,446046.3851,6476588.347,447125.733,,,
2001,5,125,5,0,1,0,0,0,0,0,,7/1/01,JDOHERTY,GLBA,H,1243.93662,0.497574648,0,6475972.016,446046.3851,6476588.347,447125.733,,,
2001,3,126,5,0,1,0,0,0,0,0,,6/9/01,JDOHERTY,GLBA,H,978.62435,0.39144974,0,6474104.661,438012.9557,6474592.534,438858.3704,,,
2001,4,126,5,0,1,0,0,0,0,2,,6/30/200,JDOHERTY,GLBA,H,978.62435,0.39144974,0,6474104.661,438012.9557,6474592.534,438858.3704,,,
2001,5,126,5,1,1,49,47,96,0,0,,7/1/01,JDOHERTY,GLBA,H,978.62435,0.39144974,1,6474104.661,438012.9557,6474592.534,438858.3704,438898.3655,6474156.809,
2001,3,127,5,0,1,0,0,0,0,0,,6/9/01,JDOHERTY,GLBA,H,889.05153,0.355620612,0,6473278.912,446194.5273,6473732.479,446960.6388,,,
2001,4,127,5,0,1,0,0,0,0,0,,6/30/200,JDOHERTY,GLBA,H,889.05153,0.355620612,0,6473278.912,446194.5273,6473732.479,446960.6388,,,
2001,5,127,5,0,1,0,0,0,0,0,,7/1/01,JDOHERTY,GLBA,H,889.05153,0.355620612,0,6473278.912,446194.5273,6473732.479,446960.6388,,,
2001,3,128,5,0,1,0,0,0,0,3,,6/9/01,JDOHERTY,GLBA,H,400.16408,0.160065632,0,6471971.251,439139.2592,6472170.098,439483.4755,,,
2001,4,128,5,0,1,0,0,0,0,3,,6/30/200,JDOHERTY,GLBA,H,400.16408,0.160065632,0,6471971.251,439139.2592,6472170.098,439483.4755,,,
2001,5,128,5,0,1,0,0,0,0,0,,7/1/01,JDOHERTY,GLBA,H,400.16408,0.160065632,0,6471971.251,439139.2592,6472170.098,439483.4755,,,
2001,4,129,5,0,1,0,0,0,0,0,,6/30/200,JDOHERTY,GLBA,H,856.83787,0.342735148,0,6470179.822,450413.3251,6470597.46,451149.822,,,
2001,5,129,5,0,1,0,0,0,0,0,,7/1/01,JDOHERTY,GLBA,H,856.83787,0.342735148,0,6470179.822,450413.3251,6470597.46,451149.822,,,
2001,3,130,5,1,1,1,0,1,4,0,,6/9/01,JDOHERTY,GLBA,H,2846.07598,1.138430392,0,6470133.053,445527.3988,6471547.286,447993.6603,446400.255,6470152.366,
2001,3,130,5,2,1,2,0,2,4,0,44,6/9/01,JDOHERTY,GLBA,H,2846.07598,1.138430392,0,6470133.053,445527.3988,6471547.286,447993.6603,446588.0134,6470328.389,20012044
2001,3,130,5,3,1,7,0,7,4,0,,6/9/01,JDOHERTY,GLBA,H,2846.07598,1.138430392,0,6470133.053,445527.3988,6471547.286,447993.6603,446822.7112,6470328.389,
2001,3,130,5,4,1,5,0,5,4,0,,6/9/01,JDOHERTY,GLBA,H,2846.07598,1.138430392,0,6470133.053,445527.3988,6471547.286,447993.6603,446986.9995,6470469.207,
2001,3,130,5,5,1,1,0,1,4,0,,6/9/01,JDOHERTY,GLBA,H,2846.07598,1.138430392,0,6470133.053,445527.3988,6471547.286,447993.6603,447855.3803,6470985.542,
2001,3,130,5,6,1,32,0,32,4,0,,6/9/01,JDOHERTY,GLBA,H,2846.07598,1.138430392,1,6470133.053,445527.3988,6471547.286,447993.6603,447524.899,6470820.657,
2001,4,130,5,1,1,1,0,1,0,0,60,6/30/200,JDOHERTY,GLBA,H,2846.07598,1.138430392,0,6470133.053,445527.3988,6471547.286,447993.6603,446414.6026,6470206.605,20011060
2001,4,130,5,2,1,2,0,2,0,0,60,6/30/200,JDOHERTY,GLBA,H,2846.07598,1.138430392,0,6470133.053,445527.3988,6471547.286,447993.6603,446595.3528,6470201.72,20012060
2001,4,130,5,3,1,1,0,1,0,0,,6/30/200,JDOHERTY,GLBA,H,2846.07598,1.138430392,0,6470133.053,445527.3988,6471547.286,447993.6603,447274.3876,6470548.565,
2001,4,130,5,4,1,1,0,1,0,0,,6/30/200,JDOHERTY,GLBA,H,2846.07598,1.138430392,0,6470133.053,445527.3988,6471547.286,447993.6603,447245.0767,6470783.052,
2001,4,130,5,5,1,1,0,1,0,0,,6/30/200,JDOHERTY,GLBA,H,2846.07598,1.138430392,0,6470133.053,445527.3988,6471547.286,447993.6603,447401.4013,6470704.89,
2001,4,130,5,6,1,8,0,8,0,0,,6/30/200,JDOHERTY,GLBA,H,2846.07598,1.138430392,0,6470133.053,445527.3988,6471547.286,447993.6603,447635.888,6470856.329,
2001,4,130,5,7,1,1,0,1,0,0,,6/30/200,JDOHERTY,GLBA,H,2846.07598,1.138430392,0,6470133.053,445527.3988,6471547.286,447993.6603,447997.3885,6471076.161,
2001,4,130,5,8,1,49,0,49,0,0,,6/30/200,JDOHERTY,GLBA,H,2846.07598,1.138430392,1,6470133.053,445527.3988,6471547.286,447993.6603,446978.895,6470527.042,
2001,5,130,5,1,1,1,0,1,0,0,83,7/1/01,JDOHERTY,GLBA,H,2846.07598,1.138430392,0,6470133.053,445527.3988,6471547.286,447993.6603,445710.1591,6470219.258,20011083
2001,5,130,5,2,1,1,0,1,0,0,,7/1/01,JDOHERTY,GLBA,H,2846.07598,1.138430392,0,6470133.053,445527.3988,6471547.286,447993.6603,445909.4308,6470431.814,
2001,5,130,5,3,1,1,0,1,0,0,,7/1/01,JDOHERTY,GLBA,H,2846.07598,1.138430392,0,6470133.053,445527.3988,6471547.286,447993.6603,445995.7811,6470279.039,
2001,5,130,5,4,1,1,0,1,0,0,,7/1/01,JDOHERTY,GLBA,H,2846.07598,1.138430392,0,6470133.053,445527.3988,6471547.286,447993.6603,446115.3445,6470558.019,
2001,5,130,5,5,1,1,0,1,0,0,,7/1/01,JDOHERTY,GLBA,H,2846.07598,1.138430392,0,6470133.053,445527.3988,6471547.286,447993.6603,446195.0529,6470398.602,
2001,5,130,5,6,1,45,0,45,0,0,,7/1/01,JDOHERTY,GLBA,H,2846.07598,1.138430392,1,6470133.053,445527.3988,6471547.286,447993.6603,446486.478,6470225.288,
2001,5,130,5,7,1,32,0,32,0,0,,7/1/01,JDOHERTY,GLBA,H,2846.07598,1.138430392,1,6470133.053,445527.3988,6471547.286,447993.6603,446807.2311,6470399.411,
2001,4,131,5,1,1,1,0,1,0,0,63,6/30/200,JDOHERTY,GLBA,H,2806.04723,1.122418892,0,6467730.009,446177.158,6469126.604,448605.4057,446966.6234,6467729.838,20011063
2001,5,131,5,0,1,0,0,0,0,0,,7/1/01,JDOHERTY,GLBA,H,2806.04723,1.122418892,0,6467730.009,446177.158,6469126.604,448605.4057,,,
2001,4,132,5,0,1,0,0,0,2,0,,6/30/200,JDOHERTY,GLBA,H,1459.7842,0.58391368,0,6467199.79,440461.0086,6467923.327,441720.8647,,,
2001,5,132,5,0,1,0,0,0,0,0,,7/1/01,JDOHERTY,GLBA,H,1459.7842,0.58391368,0,6467199.79,440461.0086,6467923.327,441720.8647,,,
2001,1,136,17,0,1,0,0,0,0,0,,6/5/01,JDOHERTY,GLBA,H,4802.65686,1.921062744,0,6508473.334,438333.7249,6510859.499,442492.4969,,,
2001,2,136,15,0,1,0,0,0,1,0,,6/7/01,JDOHERTY,GLBA,H,4802.65686,1.921062744,0,6508473.334,438333.7249,6510859.499,442492.4969,,,
2001,1,137,17,0,1,0,0,0,0,0,,6/5/01,JDOHERTY,GLBA,H,1906.37413,0.762549652,0,6507714.129,441827.7479,6508654.822,443483.3637,,,
2001,2,137,15,0,1,0,0,0,0,0,,6/7/01,JDOHERTY,GLBA,H,1906.37413,0.762549652,0,6507714.129,441827.7479,6508654.822,443483.3637,,,
2001,1,139,17,1,1,1,0,1,0,0,6,6/5/01,JDOHERTY,GLBA,H,6898.87214,2.759548856,0,6500465.003,438883.9838,6503920.837,444854.9669,442052.7061,6502302.865,20011006
2001,2,139,15,1,1,1,0,1,1,0,34,6/7/01,JDOHERTY,GLBA,H,6898.87214,2.759548856,0,6500465.003,438883.9838,6503920.837,444854.9669,442397.4304,6502526.164,20011034
2001,1,140,17,0,1,0,0,0,0,0,,6/5/01,JDOHERTY,GLBA,H,2594.25423,1.037701692,0,6497946.868,429712.9965,6499243.525,431953.2264,,,
2001,2,140,15,0,1,0,0,0,3,0,,6/7/01,JDOHERTY,GLBA,H,2594.25423,1.037701692,0,6497946.868,429712.9965,6499243.525,431953.2264,,,
2001,1,141,17,0,1,0,0,0,0,0,,6/5/01,JDOHERTY,GLBA,H,3555.99876,1.422399504,0,6493976.266,442048.6284,6495769.195,445126.9601,,,
2001,2,141,15,0,1,0,0,0,0,0,,6/7/01,JDOHERTY,GLBA,H,3555.99876,1.422399504,0,6493976.266,442048.6284,6495769.195,445126.9601,,,
2001,1,142,17,0,1,0,0,0,0,0,,6/5/01,JDOHERTY,GLBA,H,1474.84302,0.589937208,0,6491325.671,447033.3238,6492050.902,448313.4449,,,
2001,2,142,15,0,1,0,0,0,0,0,,6/7/01,JDOHERTY,GLBA,H,1474.84302,0.589937208,0,6491325.671,447033.3238,6492050.902,448313.4449,,,
2001,1,143,17,3,1,14,6,20,0,0,,6/5/01,JDOHERTY,GLBA,H,6171.92974,2.468771896,0,6487739.663,440839.6362,6490836.053,446192.4891,441297.4269,6488209.832,
2001,1,143,17,4,1,1,0,1,0,0,,6/5/01,JDOHERTY,GLBA,H,6171.92974,2.468771896,0,6487739.663,440839.6362,6490836.053,446192.4891,441830.9729,6488258.336,
2001,1,143,17,5,1,1,0,1,0,0,,6/5/01,JDOHERTY,GLBA,H,6171.92974,2.468771896,0,6487739.663,440839.6362,6490836.053,446192.4891,442031.9185,6488369.202,
2001,1,143,17,6,1,1,0,1,0,0,,6/5/01,JDOHERTY,GLBA,H,6171.92974,2.468771896,0,6487739.663,440839.6362,6490836.053,446192.4891,442212.0768,6488480.069,
2001,1,143,17,7,1,1,0,1,0,0,,6/5/01,JDOHERTY,GLBA,H,6171.92974,2.468771896,0,6487739.663,440839.6362,6490836.053,446192.4891,442399.1641,6488597.865,
2001,1,143,17,8,1,1,0,1,0,0,,6/5/01,JDOHERTY,GLBA,H,6171.92974,2.468771896,0,6487739.663,440839.6362,6490836.053,446192.4891,442579.3227,6488715.661,
2001,1,143,17,9,1,1,0,1,0,0,,6/5/01,JDOHERTY,GLBA,H,6171.92974,2.468771896,0,6487739.663,440839.6362,6490836.053,446192.4891,442801.0559,6488833.456,
2001,1,143,17,1,1,1,0,1,0,0,13,6/5/01,JDOHERTY,GLBA,H,6171.92974,2.468771896,0,6487739.663,440839.6362,6490836.053,446192.4891,441034.1186,6487717.861,20011013
2001,1,143,17,2,1,1,0,1,0,0,13,6/5/01,JDOHERTY,GLBA,H,6171.92974,2.468771896,0,6487739.663,440839.6362,6490836.053,446192.4891,441131.1269,6487731.719,20012013
2001,1,143,17,10,1,1,0,1,0,0,14,6/5/01,JDOHERTY,GLBA,H,6171.92974,2.468771896,0,6487739.663,440839.6362,6490836.053,446192.4891,443202.9472,6489041.331,20020014
2001,2,143,15,1,1,1,0,1,1,0,26,6/7/01,JDOHERTY,GLBA,H,6171.92974,2.468771896,0,6487739.663,440839.6362,6490836.053,446192.4891,441249.7977,6487521.731,20011026
2001,4,143,5,0,1,0,0,0,0,0,,6/30/200,JDOHERTY,GLBA,H,1267.47702,0.506990808,0,6509551.49,441835.9576,6510184.775,442936.1526,,,
2001,5,143,5,0,1,0,0,0,0,0,,7/1/01,JDOHERTY,GLBA,H,1267.47702,0.506990808,0,6509551.49,441835.9576,6510184.775,442936.1526,,,
2001,1,144,17,1,1,1,0,1,0,0,4,6/5/01,JDOHERTY,GLBA,H,1208.42626,0.483370504,0,6486550.251,433975.1114,6487145.192,435024.1401,434882.1571,6487034.861,20011004
2001,2,144,15,0,1,0,0,0,1,0,,6/7/01,JDOHERTY,GLBA,H,1208.42626,0.483370504,0,6486550.251,433975.1114,6487145.192,435024.1401,,,
2001,3,144,5,0,1,0,0,0,0,0,,6/9/01,JDOHERTY,GLBA,H,1313.38039,0.525352156,0,6508502.691,440014.4637,6509171.99,441154.4309,,,
2001,4,144,5,0,1,0,0,0,0,0,,6/30/200,JDOHERTY,GLBA,H,1313.38039,0.525352156,0,6508502.691,440014.4637,6509171.99,441154.4309,,,
2001,5,144,5,0,1,0,0,0,0,0,,7/1/01,JDOHERTY,GLBA,H,1313.38039,0.525352156,0,6508502.691,440014.4637,6509171.99,441154.4309,,,
2001,1,145,17,0,1,0,0,0,0,0,,6/5/01,JDOHERTY,GLBA,H,687.39452,0.274957808,0,6486045.707,433082.7142,6486388.178,433681.0128,,,
2001,2,145,15,0,1,0,0,0,0,0,,6/7/01,JDOHERTY,GLBA,H,687.39452,0.274957808,0,6486045.707,433082.7142,6486388.178,433681.0128,,,
2001,3,145,5,0,1,0,0,0,0,0,,6/9/01,JDOHERTY,GLBA,H,1909.74811,0.763899244,0,6504039.227,427463.6751,6504992.551,429115.1015,,,
2001,4,145,5,0,1,0,0,0,0,0,,6/30/200,JDOHERTY,GLBA,H,1909.74811,0.763899244,0,6504039.227,427463.6751,6504992.551,429115.1015,,,
2001,5,145,5,0,1,0,0,0,4,0,,7/1/01,JDOHERTY,GLBA,H,1909.74811,0.763899244,0,6504039.227,427463.6751,6504992.551,429115.1015,,,
2001,1,146,17,0,1,0,0,0,0,0,,6/5/01,JDOHERTY,GLBA,H,5398.23619,2.159294476,0,6485965.791,428166.3055,6488666.833,432846.0382,,,
2001,2,146,15,0,1,0,0,0,1,0,,6/7/01,JDOHERTY,GLBA,H,5398.23619,2.159294476,0,6485965.791,428166.3055,6488666.833,432846.0382,,,
2001,3,146,5,0,1,0,0,0,0,0,,6/9/01,JDOHERTY,GLBA,H,4042.24524,1.616898096,0,6501092.181,441554.4655,6503101.351,445056.0814,,,
2001,4,146,5,0,1,0,0,0,0,0,,6/30/200,JDOHERTY,GLBA,H,4042.24524,1.616898096,0,6501092.181,441554.4655,6503101.351,445056.0814,,,
2001,5,146,5,0,1,0,0,0,1,0,,7/1/01,JDOHERTY,GLBA,H,4042.24524,1.616898096,0,6501092.181,441554.4655,6503101.351,445056.0814,,,
2001,1,147,17,0,1,0,0,0,0,0,,6/5/01,JDOHERTY,GLBA,H,6489.1332,2.59565328,0,6483982.484,443911.8036,6487228.137,449531.1955,,,
2001,2,147,15,0,1,0,0,0,0,0,,6/7/01,JDOHERTY,GLBA,H,6489.1332,2.59565328,0,6483982.484,443911.8036,6487228.137,449531.1955,,,
2001,3,147,5,0,1,0,0,0,0,0,,6/9/01,JDOHERTY,GLBA,H,781.1414,0.31245656,0,6499898.507,439504.1711,6500296.427,440178.0684,,,
2001,4,147,5,0,1,0,0,0,0,0,,6/30/200,JDOHERTY,GLBA,H,781.1414,0.31245656,0,6499898.507,439504.1711,6500296.427,440178.0684,,,
2001,5,147,5,0,1,0,0,0,0,0,,7/2/01,JDOHERTY,GLBA,H,781.1414,0.31245656,0,6499898.507,439504.1711,6500296.427,440178.0684,,,
2001,1,148,17,0,1,0,0,0,0,0,,6/5/01,JDOHERTY,GLBA,H,1799.4912,0.71979648,0,6483083.402,447174.3277,6483990.675,448731.5364,,,
2001,2,148,15,0,1,0,0,0,0,0,,6/7/01,JDOHERTY,GLBA,H,1799.4912,0.71979648,0,6483083.402,447174.3277,6483990.675,448731.5364,,,
2001,3,148,5,0,1,0,0,0,0,0,,6/9/01,JDOHERTY,GLBA,H,2675.50803,1.070203212,0,6498975.134,428289.0075,6500306.704,430607.2157,,,
2001,4,148,5,0,1,0,0,0,3,0,,6/30/200,JDOHERTY,GLBA,H,2675.50803,1.070203212,0,6498975.134,428289.0075,6500306.704,430607.2157,,,
2001,5,148,5,0,1,0,0,0,3,0,,7/1/01,JDOHERTY,GLBA,H,2675.50803,1.070203212,0,6498975.134,428289.0075,6500306.704,430607.2157,,,
2001,1,149,17,0,1,0,0,0,0,0,,6/5/01,JDOHERTY,GLBA,H,1862.22917,0.744891668,0,6482101.627,435854.3343,6483022.037,437473.2328,,,
2001,2,149,15,0,1,0,0,0,1,0,,6/7/01,JDOHERTY,GLBA,H,1862.22917,0.744891668,0,6482101.627,435854.3343,6483022.037,437473.2328,,,
2001,1,150,17,0,1,0,0,0,0,0,,6/5/01,JDOHERTY,GLBA,H,1093.06441,0.437225764,0,6481588.239,449370.963,6482132.854,450320.9623,,,
2001,2,150,15,0,1,0,0,0,0,0,,6/7/01,JDOHERTY,GLBA,H,1093.06441,0.437225764,0,6481588.239,449370.963,6482132.854,450320.9623,,,
2001,3,150,5,0,1,0,0,0,0,0,,6/9/01,JDOHERTY,GLBA,H,1209.93792,0.483975168,0,6496847.411,434216.717,6497460.802,435273.0002,,,
2001,4,150,5,0,1,0,0,0,4,0,,6/30/200,JDOHERTY,GLBA,H,1209.93792,0.483975168,0,6496847.411,434216.717,6497460.802,435273.0002,,,
2001,5,150,5,0,1,0,0,0,4,0,,7/1/01,JDOHERTY,GLBA,H,1209.93792,0.483975168,0,6496847.411,434216.717,6497460.802,435273.0002,,,
2001,1,151,17,0,1,0,0,0,0,0,,6/5/01,JDOHERTY,GLBA,H,3743.74769,1.497499076,0,6478922.215,444763.6865,6480789.464,448008.9124,,,
2001,2,151,15,0,1,0,0,0,0,0,,6/7/01,JDOHERTY,GLBA,H,3743.74769,1.497499076,0,6478922.215,444763.6865,6480789.464,448008.9124,,,
2001,3,151,5,1,1,1,1,2,0,0,52,6/9/01,JDOHERTY,GLBA,H,2709.36628,1.083746512,0,6495470.143,441441.0321,6496827.646,443785.912,443023.1545,6496368.222,20011052
2001,4,151,5,2,1,1,0,1,4,0,,6/30/200,JDOHERTY,GLBA,H,2709.36628,1.083746512,0,6495470.143,441441.0321,6496827.646,443785.912,442895.4415,6496290.375,
2001,4,151,5,3,1,1,1,2,4,0,,6/30/200,JDOHERTY,GLBA,H,2709.36628,1.083746512,0,6495470.143,441441.0321,6496827.646,443785.912,442137.2257,6495852.4,
2001,4,151,5,1,1,1,0,1,4,0,78,6/30/200,JDOHERTY,GLBA,H,2709.36628,1.083746512,0,6495470.143,441441.0321,6496827.646,443785.912,443013.177,6496361.016,20011078
2001,5,151,5,1,1,2,0,2,4,4,,7/1/01,JDOHERTY,GLBA,H,2709.36628,1.083746512,0,6495470.143,441441.0321,6496827.646,443785.912,443217.1532,6496027.141,
2001,5,151,5,3,1,1,0,1,4,4,,7/1/01,JDOHERTY,GLBA,H,2709.36628,1.083746512,0,6495470.143,441441.0321,6496827.646,443785.912,443777.7144,6496271.75,
2001,5,151,5,4,1,38,15,53,4,4,,7/1/01,JDOHERTY,GLBA,H,2709.36628,1.083746512,1,6495470.143,441441.0321,6496827.646,443785.912,442920.8633,6495757.037,
2001,5,151,5,2,1,6,0,6,4,4,100,7/1/01,JDOHERTY,GLBA,H,2709.36628,1.083746512,0,6495470.143,441441.0321,6496827.646,443785.912,443502.5298,6496185.118,20012100
2001,1,152,17,0,1,0,0,0,0,0,,6/5/01,JDOHERTY,GLBA,H,893.47451,0.357389804,0,6477653.65,437757.4628,6478105.421,438533.4744,,,
2001,2,152,15,0,1,0,0,0,0,0,,6/7/01,JDOHERTY,GLBA,H,893.47451,0.357389804,0,6477653.65,437757.4628,6478105.421,438533.4744,,,
2001,3,152,5,0,1,0,0,0,0,0,,6/9/01,JDOHERTY,GLBA,H,1032.52044,0.413008176,0,6493893.237,429087.3601,6494396.865,429978.5473,,,
2001,4,152,5,0,1,0,0,0,4,0,,6/30/200,JDOHERTY,GLBA,H,1032.52044,0.413008176,0,6493893.237,429087.3601,6494396.865,429978.5473,,,
2001,5,152,5,0,1,0,0,0,1,0,,7/1/01,JDOHERTY,GLBA,H,1032.52044,0.413008176,0,6493893.237,429087.3601,6494396.865,429978.5473,,,
2001,3,153,5,0,1,0,0,0,0,0,,6/9/01,JDOHERTY,GLBA,H,3633.79104,1.453516416,0,6492225.293,431016.0708,6494045.678,434159.7663,,,
2001,4,153,5,0,1,0,0,0,4,0,,6/30/200,JDOHERTY,GLBA,H,3633.79104,1.453516416,0,6492225.293,431016.0708,6494045.678,434159.7663,,,
2001,5,153,5,0,1,0,0,0,3,0,,7/2/01,JDOHERTY,GLBA,H,3633.79104,1.453516416,0,6492225.293,431016.0708,6494045.678,434159.7663,,,
2001,3,154,5,0,1,0,0,0,0,0,,6/9/01,JDOHERTY,GLBA,H,2311.06833,0.924427332,0,6491568.368,444262.9214,6492728.104,446267.021,,,
2001,4,154,5,0,1,0,0,0,0,0,,6/30/200,JDOHERTY,GLBA,H,2311.06833,0.924427332,0,6491568.368,444262.9214,6492728.104,446267.021,,,
2001,5,154,5,0,1,0,0,0,0,0,,7/1/01,JDOHERTY,GLBA,H,2311.06833,0.924427332,0,6491568.368,444262.9214,6492728.104,446267.021,,,
2001,3,155,5,0,1,0,0,0,0,0,,6/9/01,JDOHERTY,GLBA,H,1270.09811,0.508039244,0,6489747.71,431525.4503,6490378.101,432632.8667,,,
2001,4,155,5,0,1,0,0,0,0,0,,6/30/200,JDOHERTY,GLBA,H,1270.09811,0.508039244,0,6489747.71,431525.4503,6490378.101,432632.8667,,,
2001,5,155,5,0,1,0,0,0,0,0,,7/1/01,JDOHERTY,GLBA,H,1270.09811,0.508039244,0,6489747.71,431525.4503,6490378.101,432632.8667,,,
2001,3,156,5,2,1,2,1,3,0,0,,6/9/01,JDOHERTY,GLBA,H,3869.5128,1.54780512,0,6489432.944,440554.7188,6491350.832,443900.9586,443186.5784,6490943.608,
2001,3,156,5,3,1,1,0,1,0,0,,6/9/01,JDOHERTY,GLBA,H,3869.5128,1.54780512,0,6489432.944,440554.7188,6491350.832,443900.9586,442944.0788,6490911.977,
2001,3,156,5,4,1,1,0,1,0,0,,6/9/01,JDOHERTY,GLBA,H,3869.5128,1.54780512,0,6489432.944,440554.7188,6491350.832,443900.9586,442901.9051,6490690.565,
2001,3,156,5,5,1,1,0,1,0,0,,6/9/01,JDOHERTY,GLBA,H,3869.5128,1.54780512,0,6489432.944,440554.7188,6491350.832,443900.9586,442733.2093,6490774.912,
2001,3,156,5,6,1,24,0,24,0,0,,6/9/01,JDOHERTY,GLBA,H,3869.5128,1.54780512,0,6489432.944,440554.7188,6491350.832,443900.9586,441752.6671,6490100.131,
2001,3,156,5,1,1,1,0,1,0,0,56,6/9/01,JDOHERTY,GLBA,H,3869.5128,1.54780512,0,6489432.944,440554.7188,6491350.832,443900.9586,443407.9916,6491070.129,20011056
2001,3,156,5,7,1,1,0,1,0,0,57,6/9/01,JDOHERTY,GLBA,H,3869.5128,1.54780512,0,6489432.944,440554.7188,6491350.832,443900.9586,441172.7767,6489762.74,20017057
2001,4,156,5,5,1,1,0,1,0,0,,6/30/200,JDOHERTY,GLBA,H,3869.5128,1.54780512,0,6489432.944,440554.7188,6491350.832,443900.9586,441084.5498,6489750.619,
2001,4,156,5,6,1,1,0,1,0,0,,6/30/200,JDOHERTY,GLBA,H,3869.5128,1.54780512,0,6489432.944,440554.7188,6491350.832,443900.9586,440888.0259,6489744.572,
2001,4,156,5,7,1,2,0,2,0,0,,6/30/200,JDOHERTY,GLBA,H,3869.5128,1.54780512,0,6489432.944,440554.7188,6491350.832,443900.9586,440779.1819,6489451.298,
2001,4,156,5,8,1,3,0,3,0,0,,6/30/200,JDOHERTY,GLBA,H,3869.5128,1.54780512,0,6489432.944,440554.7188,6491350.832,443900.9586,440603.8221,6489496.649,
2001,4,156,5,1,1,1,0,1,0,0,75,6/30/200,JDOHERTY,GLBA,H,3869.5128,1.54780512,0,6489432.944,440554.7188,6491350.832,443900.9586,441489.6912,6489932.025,20011075
2001,4,156,5,2,1,1,0,1,0,0,75,6/30/200,JDOHERTY,GLBA,H,3869.5128,1.54780512,0,6489432.944,440554.7188,6491350.832,443900.9586,441317.3549,6489944.119,20012075
2001,4,156,5,3,1,1,0,1,0,0,75,6/30/200,JDOHERTY,GLBA,H,3869.5128,1.54780512,0,6489432.944,440554.7188,6491350.832,443900.9586,441383.8706,6489786.9,20013075
2001,4,156,5,4,1,1,0,1,0,0,75,6/30/200,JDOHERTY,GLBA,H,3869.5128,1.54780512,0,6489432.944,440554.7188,6491350.832,443900.9586,441238.7453,6489844.345,20014075
2001,5,156,5,2,1,1,0,1,0,0,,7/1/01,JDOHERTY,GLBA,H,3869.5128,1.54780512,0,6489432.944,440554.7188,6491350.832,443900.9586,440893.3723,6489280.022,
2001,5,156,5,3,1,1,0,1,0,0,,7/1/01,JDOHERTY,GLBA,H,3869.5128,1.54780512,0,6489432.944,440554.7188,6491350.832,443900.9586,440990.1965,6489101.661,
2001,5,156,5,4,1,1,0,1,0,0,,7/1/01,JDOHERTY,GLBA,H,3869.5128,1.54780512,0,6489432.944,440554.7188,6491350.832,443900.9586,440822.0278,6489122.045,
2001,5,156,5,1,1,1,0,1,0,0,97,7/1/01,JDOHERTY,GLBA,H,3869.5128,1.54780512,0,6489432.944,440554.7188,6491350.832,443900.9586,441163.4606,6489315.694,20011097
2001,3,157,5,0,1,0,0,0,0,0,,6/9/01,JDOHERTY,GLBA,H,4224.08493,1.689633972,0,6489328.344,445172.2411,6491431.783,448819.2641,,,
2001,4,157,5,0,1,0,0,0,1,0,,6/30/200,JDOHERTY,GLBA,H,4224.08493,1.689633972,0,6489328.344,445172.2411,6491431.783,448819.2641,,,
2001,5,157,5,0,1,0,0,0,4,0,,7/1/01,JDOHERTY,GLBA,H,4224.08493,1.689633972,0,6489328.344,445172.2411,6491431.783,448819.2641,,,
2001,3,158,5,0,1,0,0,0,0,0,,6/9/01,JDOHERTY,GLBA,H,1846.98872,0.738795488,0,6484032.598,445622.7115,6484957.287,447219.0216,,,
2001,4,158,5,0,1,0,0,0,0,0,,6/30/200,JDOHERTY,GLBA,H,1846.98872,0.738795488,0,6484032.598,445622.7115,6484957.287,447219.0216,,,
2001,5,158,5,0,1,0,0,0,3,0,,7/1/01,JDOHERTY,GLBA,H,1846.98872,0.738795488,0,6484032.598,445622.7115,6484957.287,447219.0216,,,
2001,3,159,5,0,1,0,0,0,0,0,,6/9/01,JDOHERTY,GLBA,H,5117.89823,2.047159292,0,6478320.396,445329.3516,6480877.987,449760.4924,,,
2001,4,159,5,0,1,0,0,0,0,0,,6/30/200,JDOHERTY,GLBA,H,5117.89823,2.047159292,0,6478320.396,445329.3516,6480877.987,449760.4924,,,
2001,5,159,5,0,1,0,0,0,3,0,,7/1/01,JDOHERTY,GLBA,H,5117.89823,2.047159292,0,6478320.396,445329.3516,6480877.987,449760.4924,,,
2001,4,160,5,1,1,1,1,2,0,0,81,6/30/200,JDOHERTY,GLBA,H,1953.51997,0.781407988,0,6468862.458,438544.883,6469838.621,440237.5686,439082.6616,6469091.084,20011081
2001,4,160,5,2,1,1,0,1,0,0,81,6/30/200,JDOHERTY,GLBA,H,1953.51997,0.781407988,0,6468862.458,438544.883,6469838.621,440237.5686,438869.9249,6469082.032,20012081
2001,5,160,5,0,1,0,0,0,0,0,,7/1/01,JDOHERTY,GLBA,H,1953.51997,0.781407988,0,6468862.458,438544.883,6469838.621,440237.5686,,,
2001,1,223,17,0,1,0,0,0,0,0,,6/5/01,JDOHERTY,GLBA,H,1850.55044,0.740220176,0,6510967.1,440284.1466,6511889.445,441880.6383,,,
2001,2,223,15,0,1,0,0,0,0,0,,6/7/01,JDOHERTY,GLBA,H,1850.55044,0.740220176,0,6510967.1,440284.1466,6511889.445,441880.6383,,,
2001,1,226,17,0,1,0,0,0,0,0,,6/5/01,JDOHERTY,GLBA,H,981.01902,0.392407608,0,6509286.655,442169.8983,6509775.259,443017.0108,,,
2001,2,226,15,0,1,0,0,0,0,0,,6/7/01,JDOHERTY,GLBA,H,981.01902,0.392407608,0,6509286.655,442169.8983,6509775.259,443017.0108,,,
2001,1,227,17,0,1,0,0,0,0,0,,6/5/01,JDOHERTY,GLBA,H,402.79278,0.161117112,0,6508563.446,440894.1412,6508762.29,441244.7808,,,
2001,2,227,15,0,1,0,0,0,0,0,,6/7/01,JDOHERTY,GLBA,H,402.79278,0.161117112,0,6508563.446,440894.1412,6508762.29,441244.7808,,,
2001,1,230,17,0,1,0,0,0,0,0,,6/5/01,JDOHERTY,GLBA,H,632.83602,0.253134408,0,6506779.587,433012.4094,6507085.75,433558.6935,,,
2001,2,230,15,0,1,0,0,0,4,0,,6/7/01,JDOHERTY,GLBA,H,632.83602,0.253134408,0,6506779.587,433012.4094,6507085.75,433558.6935,,,
2001,3,231,5,0,1,0,0,0,0,0,,6/9/01,JDOHERTY,GLBA,H,432.38761,0.172955044,0,6512805.213,440244.9162,6513022.259,440614.7862,,,
2001,4,231,5,0,1,0,0,0,0,0,,6/30/200,JDOHERTY,GLBA,H,432.38761,0.172955044,0,6512805.213,440244.9162,6513022.259,440614.7862,,,
2001,5,231,5,0,1,0,0,0,0,0,,7/1/01,JDOHERTY,GLBA,H,432.38761,0.172955044,0,6512805.213,440244.9162,6513022.259,440614.7862,,,
2001,1,233,17,0,1,0,0,0,0,0,,6/5/01,JDOHERTY,GLBA,H,433.34872,0.173339488,0,6504474.23,429037.9782,6504690.213,429409.2733,,,
2001,2,233,15,0,1,0,0,0,0,0,,6/7/01,JDOHERTY,GLBA,H,433.34872,0.173339488,0,6504474.23,429037.9782,6504690.213,429409.2733,,,
2001,1,234,17,0,1,0,0,0,0,0,,6/5/01,JDOHERTY,GLBA,H,1482.62586,0.593050344,0,6504407.258,443295.8931,6505131.119,444582.1872,,,
2001,2,234,15,0,1,0,0,0,1,0,,6/7/01,JDOHERTY,GLBA,H,1482.62586,0.593050344,0,6504407.258,443295.8931,6505131.119,444582.1872,,,
2001,1,236,17,0,1,0,0,0,0,0,,6/5/01,JDOHERTY,GLBA,H,990.88584,0.396354336,0,6503954.128,437730.232,6504460.173,438589.0187,,,
2001,2,236,15,0,1,0,0,0,4,0,,6/7/01,JDOHERTY,GLBA,H,990.88584,0.396354336,0,6503954.128,437730.232,6504460.173,438589.0187,,,
2001,1,237,17,0,1,0,0,0,0,0,,6/5/01,JDOHERTY,GLBA,H,584.57645,0.23383058,0,6503485.27,427308.289,6503772.798,427816.484,,,
2001,2,237,15,0,1,0,0,0,0,0,,6/7/01,JDOHERTY,GLBA,H,584.57645,0.23383058,0,6503485.27,427308.289,6503772.798,427816.484,,,
2001,4,237,5,0,1,0,0,0,0,0,,6/30/200,JDOHERTY,GLBA,H,1192.24307,0.476897228,0,6507924.779,441396.2945,6508521.829,442428.886,,,
2001,5,237,5,0,1,0,0,0,0,0,,7/1/01,JDOHERTY,GLBA,H,1192.24307,0.476897228,0,6507924.779,441396.2945,6508521.829,442428.886,,,
2001,1,238,17,0,1,0,0,0,0,0,,6/5/01,JDOHERTY,GLBA,H,698.23851,0.279295404,0,6503266.883,441345.3736,6503629.016,441950.2881,,,
2001,2,238,15,0,1,0,0,0,3,0,,6/7/01,JDOHERTY,GLBA,H,698.23851,0.279295404,0,6503266.883,441345.3736,6503629.016,441950.2881,,,
2001,1,239,17,0,1,0,0,0,0,0,,6/5/01,JDOHERTY,GLBA,H,534.15172,0.213660688,0,6502532.338,425675.1167,6502801.832,426144.5319,,,
2001,2,239,15,0,1,0,0,0,0,0,,6/7/01,JDOHERTY,GLBA,H,534.15172,0.213660688,0,6502532.338,425675.1167,6502801.832,426144.5319,,,
2001,1,240,17,0,1,0,0,0,0,0,,6/5/01,JDOHERTY,GLBA,H,417.10416,0.166841664,0,6501978.299,429514.834,6502194.503,429876.6632,,,
2001,2,240,15,0,1,0,0,0,0,0,,6/7/01,JDOHERTY,GLBA,H,417.10416,0.166841664,0,6501978.299,429514.834,6502194.503,429876.6632,,,
2001,1,241,17,0,1,0,0,0,0,0,,6/5/01,JDOHERTY,GLBA,H,4096.41696,1.638566784,0,6500645.964,441605.824,6502691.749,445147.0042,,,
2001,2,241,15,2,1,1,0,1,3,0,,6/7/01,JDOHERTY,GLBA,H,4096.41696,1.638566784,0,6500645.964,441605.824,6502691.749,445147.0042,441887.8277,6500396.262,
2001,2,241,15,1,1,1,0,1,3,0,33,6/7/01,JDOHERTY,GLBA,H,4096.41696,1.638566784,0,6500645.964,441605.824,6502691.749,445147.0042,442252.4162,6500472.218,20011033
2001,3,241,5,0,1,0,0,0,0,0,,6/9/01,JDOHERTY,GLBA,H,2714.77379,1.085909516,0,6505774.355,442465.4665,6507132.319,444813.5662,,,
2001,4,241,5,0,1,0,0,0,0,0,,6/30/200,JDOHERTY,GLBA,H,2714.77379,1.085909516,0,6505774.355,442465.4665,6507132.319,444813.5662,,,
2001,5,241,5,0,1,0,0,0,0,0,,7/1/01,JDOHERTY,GLBA,H,2714.77379,1.085909516,0,6505774.355,442465.4665,6507132.319,444813.5662,,,
2001,1,243,17,0,1,0,0,0,0,0,,6/5/01,JDOHERTY,GLBA,H,1735.68254,0.694273016,0,6500467.808,426874.4775,6501330.779,428380.7424,,,
2001,2,243,15,0,1,0,0,0,0,0,,6/7/01,JDOHERTY,GLBA,H,1735.68254,0.694273016,0,6500467.808,426874.4775,6501330.779,428380.7424,,,
2001,1,244,17,0,1,0,0,0,0,0,,6/5/01,JDOHERTY,GLBA,H,667.48911,0.266995644,0,6500379.404,445927.2281,6500705.535,446502.6103,,,
2001,3,244,5,0,1,0,0,0,0,0,,6/9/01,JDOHERTY,GLBA,H,501.24179,0.200496716,0,6503580.281,424273.5785,6503831.613,424713.6145,,,
2001,4,244,5,0,1,0,0,0,0,0,,6/30/200,JDOHERTY,GLBA,H,501.24179,0.200496716,0,6503580.281,424273.5785,6503831.613,424713.6145,,,
2001,5,244,5,0,1,0,0,0,4,0,,7/1/01,JDOHERTY,GLBA,H,501.24179,0.200496716,0,6503580.281,424273.5785,6503831.613,424713.6145,,,
2001,1,245,17,0,1,0,0,0,0,0,,6/5/01,JDOHERTY,GLBA,H,2759.19673,1.103678692,0,6498726.985,428662.0424,6500094.689,431048.6464,,,
2001,2,245,15,0,1,0,0,0,2,0,,6/7/01,JDOHERTY,GLBA,H,2759.19673,1.103678692,0,6498726.985,428662.0424,6500094.689,431048.6464,,,
2001,3,245,5,0,1,0,0,0,0,0,,6/9/01,JDOHERTY,GLBA,H,819.38034,0.327752136,0,6503315.365,438213.1632,6503731.009,438925.5759,,,
2001,4,245,5,1,1,1,0,1,2,0,80,6/30/200,JDOHERTY,GLBA,H,819.38034,0.327752136,0,6503315.365,438213.1632,6503731.009,438925.5759,438800.9175,6503626.979,20011080
2001,5,245,5,0,1,0,0,0,0,0,,7/2/01,JDOHERTY,GLBA,H,819.38034,0.327752136,0,6503315.365,438213.1632,6503731.009,438925.5759,,,
2001,3,246,5,0,1,0,0,0,0,0,,6/9/01,JDOHERTY,GLBA,H,1696.9108,0.67876432,0,6501909.892,426195.3255,6502754.762,427662.184,,,
2001,4,246,5,0,1,0,0,0,4,0,,6/30/200,JDOHERTY,GLBA,H,1696.9108,0.67876432,0,6501909.892,426195.3255,6502754.762,427662.184,,,
2001,5,246,5,0,1,0,0,0,4,0,,7/1/01,JDOHERTY,GLBA,H,1696.9108,0.67876432,0,6501909.892,426195.3255,6502754.762,427662.184,,,
2001,3,247,5,0,1,0,0,0,0,0,,6/9/01,JDOHERTY,GLBA,H,582.11502,0.232846008,0,6501788.737,430769.0622,6502076.716,431277.2062,,,
2001,4,247,5,0,1,0,0,0,4,0,,6/30/200,JDOHERTY,GLBA,H,582.11502,0.232846008,0,6501788.737,430769.0622,6502076.716,431277.2062,,,
2001,5,247,5,0,1,0,0,0,4,0,,7/2/01,JDOHERTY,GLBA,H,582.11502,0.232846008,0,6501788.737,430769.0622,6502076.716,431277.2062,,,
2001,1,248,17,0,1,0,0,0,0,0,,6/5/01,JDOHERTY,GLBA,H,486.1255,0.1944502,0,6498048.806,446698.4868,6498302.792,447127.9423,,,
2001,2,248,15,0,1,0,0,0,0,0,,6/7/01,JDOHERTY,GLBA,H,486.1255,0.1944502,0,6498048.806,446698.4868,6498302.792,447127.9423,,,
2001,3,248,5,0,1,0,0,0,0,0,,6/9/01,JDOHERTY,GLBA,H,1402.28341,0.560913364,0,6501257.003,444236.7505,6501945.012,445455.6711,,,
2001,4,248,5,0,1,0,0,0,0,0,,6/30/200,JDOHERTY,GLBA,H,1402.28341,0.560913364,0,6501257.003,444236.7505,6501945.012,445455.6711,,,
2001,5,248,5,0,1,0,0,0,0,0,,7/1/01,JDOHERTY,GLBA,H,1402.28341,0.560913364,0,6501257.003,444236.7505,6501945.012,445455.6711,,,
2001,1,249,17,0,1,0,0,0,0,0,,6/5/01,JDOHERTY,GLBA,H,2082.51238,0.833004952,0,6496842.879,430206.4811,6497887.617,432007.0175,,,
2001,2,249,15,0,1,0,0,0,4,0,,6/7/01,JDOHERTY,GLBA,H,2082.51238,0.833004952,0,6496842.879,430206.4811,6497887.617,432007.0175,,,
2001,3,249,5,0,1,0,0,0,0,0,,6/9/01,JDOHERTY,GLBA,H,639.0812,0.25563248,0,6501104.791,429576.4261,6501410.475,430123.7706,,,
2001,4,249,5,0,1,0,0,0,1,0,,6/30/200,JDOHERTY,GLBA,H,639.0812,0.25563248,0,6501104.791,429576.4261,6501410.475,430123.7706,,,
2001,5,249,5,0,1,0,0,0,0,0,,7/1/01,JDOHERTY,GLBA,H,639.0812,0.25563248,0,6501104.791,429576.4261,6501410.475,430123.7706,,,
2001,3,250,5,0,1,0,0,0,0,0,,6/9/01,JDOHERTY,GLBA,H,1330.6234,0.53224936,0,6500134.424,442304.595,6500804.257,443456.2299,,,
2001,4,250,5,0,1,0,0,0,0,0,,6/30/200,JDOHERTY,GLBA,H,1330.6234,0.53224936,0,6500134.424,442304.595,6500804.257,443456.2299,,,
2001,5,250,5,0,1,0,0,0,1,0,,7/1/01,JDOHERTY,GLBA,H,1330.6234,0.53224936,0,6500134.424,442304.595,6500804.257,443456.2299,,,
2001,1,252,17,0,1,0,0,0,0,0,,6/5/01,JDOHERTY,GLBA,H,696.49369,0.278597476,0,6495978.667,428728.0047,6496339.025,429325.5541,,,
2001,2,252,15,0,1,0,0,0,0,0,,6/7/01,JDOHERTY,GLBA,H,696.49369,0.278597476,0,6495978.667,428728.0047,6496339.025,429325.5541,,,
2001,3,252,5,0,1,0,0,0,0,0,,6/9/01,JDOHERTY,GLBA,H,1579.26529,0.631706116,0,6499845.347,427404.8406,6500636.776,428774.4248,,,
2001,4,252,5,0,1,0,0,0,4,0,,6/30/200,JDOHERTY,GLBA,H,1579.26529,0.631706116,0,6499845.347,427404.8406,6500636.776,428774.4248,,,
2001,5,252,5,0,1,0,0,0,4,0,,7/1/01,JDOHERTY,GLBA,H,1579.26529,0.631706116,0,6499845.347,427404.8406,6500636.776,428774.4248,,,
2001,3,253,5,0,1,0,0,0,0,0,,6/9/01,JDOHERTY,GLBA,H,589.17811,0.235671244,0,6499433.304,445894.7359,6499723.249,446402.0152,,,
2001,4,253,5,0,1,0,0,0,0,0,,6/30/200,JDOHERTY,GLBA,H,589.17811,0.235671244,0,6499433.304,445894.7359,6499723.249,446402.0152,,,
2001,5,253,5,0,1,0,0,0,0,0,,7/1/01,JDOHERTY,GLBA,H,589.17811,0.235671244,0,6499433.304,445894.7359,6499723.249,446402.0152,,,
2001,1,254,17,1,1,1,0,1,0,0,9,6/5/01,JDOHERTY,GLBA,H,2824.0848,1.12963392,0,6495114.967,441610.117,6496526.71,444062.4695,443165.0613,6496068.849,20011009
2001,1,254,17,2,1,1,0,1,0,0,9,6/5/01,JDOHERTY,GLBA,H,2824.0848,1.12963392,0,6495114.967,441610.117,6496526.71,444062.4695,443275.7047,6495988.381,20012009
2001,1,254,17,3,1,6,0,6,0,0,9,6/5/01,JDOHERTY,GLBA,H,2824.0848,1.12963392,0,6495114.967,441610.117,6496526.71,444062.4695,443099.6816,6495943.118,20013009
2001,1,254,17,4,1,4,0,4,0,0,9,6/5/01,JDOHERTY,GLBA,H,2824.0848,1.12963392,0,6495114.967,441610.117,6496526.71,444062.4695,443185.1782,6495892.826,20014009
2001,1,254,17,5,1,1,0,1,0,0,,6/5/01,JDOHERTY,GLBA,H,2824.0848,1.12963392,0,6495114.967,441610.117,6496526.71,444062.4695,440635.3566,6491693.415,
2001,1,254,17,6,1,2,0,2,0,0,,6/5/01,JDOHERTY,GLBA,H,2824.0848,1.12963392,0,6495114.967,441610.117,6496526.71,444062.4695,443461.7867,6496179.492,
2001,1,254,17,7,1,1,0,1,0,0,,6/5/01,JDOHERTY,GLBA,H,2824.0848,1.12963392,0,6495114.967,441610.117,6496526.71,444062.4695,443622.7218,6496270.019,
2001,1,254,17,8,1,1,0,1,0,0,,6/5/01,JDOHERTY,GLBA,H,2824.0848,1.12963392,0,6495114.967,441610.117,6496526.71,444062.4695,443813.8327,6496380.662,
2001,2,254,15,1,1,1,0,1,0,0,30,6/7/01,JDOHERTY,GLBA,H,2824.0848,1.12963392,0,6495114.967,441610.117,6496526.71,444062.4695,441965.5752,6494953.548,20011030
2001,2,254,15,2,1,1,0,1,0,0,30,6/7/01,JDOHERTY,GLBA,H,2824.0848,1.12963392,0,6495114.967,441610.117,6496526.71,444062.4695,442108.3877,6495037.556,20012030
2001,2,254,15,3,1,1,0,1,0,0,30,6/7/01,JDOHERTY,GLBA,H,2824.0848,1.12963392,0,6495114.967,441610.117,6496526.71,444062.4695,442108.3877,6494869.541,20013030
2001,1,255,17,0,1,0,0,0,3,0,,6/5/01,JDOHERTY,GLBA,H,2787.326,1.1149304,0,6494848.048,445966.7319,6496244.477,448378.634,,,
2001,2,255,15,0,1,0,0,0,0,0,,6/7/01,JDOHERTY,GLBA,H,2787.326,1.1149304,0,6494848.048,445966.7319,6496244.477,448378.634,,,
2001,3,255,5,0,1,0,0,0,0,0,,6/9/01,JDOHERTY,GLBA,H,454.56607,0.181826428,0,6497320.625,447017.7805,6497537.926,447417.7479,,,
2001,4,255,5,0,1,0,0,0,0,0,,6/30/200,JDOHERTY,GLBA,H,454.56607,0.181826428,0,6497320.625,447017.7805,6497537.926,447417.7479,,,
2001,5,255,5,0,1,0,0,0,1,0,,7/1/01,JDOHERTY,GLBA,H,454.56607,0.181826428,0,6497320.625,447017.7805,6497537.926,447417.7479,,,
2001,1,256,17,0,1,0,0,0,0,0,,6/5/01,JDOHERTY,GLBA,H,400.59935,0.16023974,0,6494808.353,436294.9869,6495006.945,436637.3966,,,
2001,2,256,15,0,1,0,0,0,4,0,,6/7/01,JDOHERTY,GLBA,H,400.59935,0.16023974,0,6494808.353,436294.9869,6495006.945,436637.3966,,,
2001,3,256,5,1,1,1,0,1,0,0,53,6/9/01,JDOHERTY,GLBA,H,1173.19327,0.469277308,0,6496934.611,441559.8678,6497513.443,442575.6553,442385.2749,6497459.47,20011053
2001,3,256,5,2,1,1,0,1,0,0,53,6/9/01,JDOHERTY,GLBA,H,1173.19327,0.469277308,0,6496934.611,441559.8678,6497513.443,442575.6553,442374.732,6497322.405,20012053
2001,3,256,5,3,1,1,0,1,0,0,53,6/9/01,JDOHERTY,GLBA,H,1173.19327,0.469277308,0,6496934.611,441559.8678,6497513.443,442575.6553,442522.3406,6497385.666,20013053
2001,4,256,5,5,1,1,1,2,4,0,,6/30/200,JDOHERTY,GLBA,H,1173.19327,0.469277308,0,6496934.611,441559.8678,6497513.443,442575.6553,442264.1346,6497336.574,
2001,4,256,5,6,1,1,1,2,4,0,,6/30/200,JDOHERTY,GLBA,H,1173.19327,0.469277308,0,6496934.611,441559.8678,6497513.443,442575.6553,442554.0402,6497361.073,
2001,4,256,5,1,1,1,1,2,4,0,79,6/30/200,JDOHERTY,GLBA,H,1173.19327,0.469277308,0,6496934.611,441559.8678,6497513.443,442575.6553,441782.3201,6497107.916,20011079
2001,4,256,5,2,1,1,1,2,4,0,79,6/30/200,JDOHERTY,GLBA,H,1173.19327,0.469277308,0,6496934.611,441559.8678,6497513.443,442575.6553,441855.8173,6496956.839,20012079
2001,4,256,5,3,1,1,1,2,4,0,79,6/30/200,JDOHERTY,GLBA,H,1173.19327,0.469277308,0,6496934.611,441559.8678,6497513.443,442575.6553,441945.6472,6497185.497,20013079
2001,4,256,5,4,1,1,0,1,4,0,79,6/30/200,JDOHERTY,GLBA,H,1173.19327,0.469277308,0,6496934.611,441559.8678,6497513.443,442575.6553,442010.9778,6497046.669,20014079
2001,5,256,5,0,1,0,0,0,4,0,,7/1/01,JDOHERTY,GLBA,H,1173.19327,0.469277308,0,6496934.611,441559.8678,6497513.443,442575.6553,,,
2001,1,257,17,0,1,0,0,0,0,0,,6/5/01,JDOHERTY,GLBA,H,2667.63877,1.067055508,0,6494347.473,430665.8472,6495680.628,432976.2058,,,
2001,2,257,15,0,1,0,0,0,4,0,,6/7/01,JDOHERTY,GLBA,H,2667.63877,1.067055508,0,6494347.473,430665.8472,6495680.628,432976.2058,,,
2001,1,258,17,0,1,0,0,0,0,0,,6/5/01,JDOHERTY,GLBA,H,642.89426,0.257157704,0,6493788.893,429725.2849,6494112.984,430283.6418,,,
2001,2,258,15,0,1,0,0,0,0,0,,6/7/01,JDOHERTY,GLBA,H,642.89426,0.257157704,0,6493788.893,429725.2849,6494112.984,430283.6418,,,
2001,3,258,5,0,1,0,0,0,0,0,,6/9/01,JDOHERTY,GLBA,H,2649.70186,1.059880744,0,6496022.979,430385.5797,6497356.132,432685.3882,,,
2001,4,258,5,0,1,0,0,0,4,0,,6/30/200,JDOHERTY,GLBA,H,2649.70186,1.059880744,0,6496022.979,430385.5797,6497356.132,432685.3882,,,
2001,5,258,5,0,1,0,0,0,4,0,,7/1/01,JDOHERTY,GLBA,H,2649.70186,1.059880744,0,6496022.979,430385.5797,6497356.132,432685.3882,,,
2001,1,259,17,0,1,0,0,0,0,0,,6/5/01,JDOHERTY,GLBA,H,2580.79278,1.032317112,0,6492855.889,442507.0665,6494141.455,444735.7732,,,
2001,2,259,15,1,1,1,0,1,0,0,29,6/7/01,JDOHERTY,GLBA,H,2580.79278,1.032317112,0,6492855.889,442507.0665,6494141.455,444735.7732,443864.14,6493172.595,20011029
2001,3,259,5,0,1,0,0,0,0,0,,6/9/01,JDOHERTY,GLBA,H,833.92191,0.333568764,0,6495356.995,429230.2372,6495770.833,429954.7525,,,
2001,4,259,5,0,1,0,0,0,4,0,,6/30/200,JDOHERTY,GLBA,H,833.92191,0.333568764,0,6495356.995,429230.2372,6495770.833,429954.7525,,,
2001,5,259,5,0,1,0,0,0,0,0,,7/1/01,JDOHERTY,GLBA,H,833.92191,0.333568764,0,6495356.995,429230.2372,6495770.833,429954.7525,,,
2001,1,260,17,0,1,0,0,0,0,0,,6/5/01,JDOHERTY,GLBA,H,648.28642,0.259314568,0,6492572.355,446798.139,6492898.877,447355.1913,,,
2001,2,260,15,0,1,0,0,0,0,0,,6/7/01,JDOHERTY,GLBA,H,648.28642,0.259314568,0,6492572.355,446798.139,6492898.877,447355.1913,,,
2001,1,261,17,0,1,0,0,0,0,0,,6/5/01,JDOHERTY,GLBA,H,2498.0578,0.99922312,0,6492482.241,432242.4631,6493725.992,434406.4153,,,
2001,2,261,15,0,1,0,0,0,4,0,,6/7/01,JDOHERTY,GLBA,H,2498.0578,0.99922312,0,6492482.241,432242.4631,6493725.992,434406.4153,,,
2001,3,261,5,0,1,0,0,0,0,0,,6/9/01,JDOHERTY,GLBA,H,404.94022,0.161976088,0,6494025.068,436524.5237,6494223.523,436876.6784,,,
2001,4,261,5,0,1,0,0,0,4,0,,6/30/200,JDOHERTY,GLBA,H,404.94022,0.161976088,0,6494025.068,436524.5237,6494223.523,436876.6784,,,
2001,5,261,5,0,1,0,0,0,4,0,,7/2/01,JDOHERTY,GLBA,H,404.94022,0.161976088,0,6494025.068,436524.5237,6494223.523,436876.6784,,,
2001,1,262,17,0,1,0,0,0,0,0,,6/5/01,JDOHERTY,GLBA,H,1018.27305,0.40730922,0,6492006.766,436229.8608,6492512.177,437110.8133,,,
2001,2,262,15,0,1,0,0,0,4,0,,6/7/01,JDOHERTY,GLBA,H,1018.27305,0.40730922,0,6492006.766,436229.8608,6492512.177,437110.8133,,,
2001,3,262,5,0,1,0,0,0,0,0,,6/9/01,JDOHERTY,GLBA,H,4155.24292,1.662097168,0,6492932.909,429845.6246,6495022.893,433449.4457,,,
2001,4,262,5,0,1,0,0,0,4,0,,6/30/200,JDOHERTY,GLBA,H,4155.24292,1.662097168,0,6492932.909,429845.6246,6495022.893,433449.4457,,,
2001,5,262,5,0,1,0,0,0,3,0,,7/2/01,JDOHERTY,GLBA,H,4155.24292,1.662097168,0,6492932.909,429845.6246,6495022.893,433449.4457,,,
2001,1,263,17,1,1,1,0,1,1,0,10,6/5/01,JDOHERTY,GLBA,H,1105.39122,0.442156488,0,6491517.407,440179.0658,6492078.203,441137.9973,443954.6512,6496461.129,20011010
2001,2,263,15,1,1,165,2,167,0,0,,6/7/01,JDOHERTY,GLBA,H,1105.39122,0.442156488,1,6491517.407,440179.0658,6492078.203,441137.9973,440539.4658,6491279.064,
2001,2,263,15,2,1,8,0,8,0,0,,6/7/01,JDOHERTY,GLBA,H,1105.39122,0.442156488,1,6491517.407,440179.0658,6492078.203,441137.9973,440688.0584,6491167.62,
2001,3,263,5,0,1,0,0,0,0,0,,6/9/01,JDOHERTY,GLBA,H,2377.09379,0.950837516,0,6491896.64,432833.6176,6493086.829,434890.1441,,,
2001,4,263,5,0,1,0,0,0,4,0,,6/30/200,JDOHERTY,GLBA,H,2377.09379,0.950837516,0,6491896.64,432833.6176,6493086.829,434890.1441,,,
2001,5,263,5,0,1,0,0,0,4,0,,7/2/01,JDOHERTY,GLBA,H,2377.09379,0.950837516,0,6491896.64,432833.6176,6493086.829,434890.1441,,,
2001,1,264,17,0,1,0,0,0,0,0,,6/5/01,JDOHERTY,GLBA,H,420.53093,0.168212372,0,6491512.356,449761.0331,6491711.877,450122.4077,,,
2001,2,264,15,0,1,0,0,0,0,0,,6/7/01,JDOHERTY,GLBA,H,420.53093,0.168212372,0,6491512.356,449761.0331,6491711.877,450122.4077,,,
2001,3,264,5,0,1,0,0,0,0,0,,6/9/01,JDOHERTY,GLBA,H,1278.26681,0.511306724,0,6491789.047,447078.3957,6492442.379,448182.8836,,,
2001,4,264,5,0,1,0,0,0,0,0,,6/30/200,JDOHERTY,GLBA,H,1278.26681,0.511306724,0,6491789.047,447078.3957,6492442.379,448182.8836,,,
2001,5,264,5,0,1,0,0,0,0,2,,7/1/01,JDOHERTY,GLBA,H,1278.26681,0.511306724,0,6491789.047,447078.3957,6492442.379,448182.8836,,,
2001,3,265,5,0,1,0,0,0,0,0,,6/9/01,JDOHERTY,GLBA,H,1798.56581,0.719426324,0,6488337.847,431481.3414,6489238.889,433040.2594,,,
2001,4,265,5,0,1,0,0,0,0,0,,6/30/200,JDOHERTY,GLBA,H,1798.56581,0.719426324,0,6488337.847,431481.3414,6489238.889,433040.2594,,,
2001,5,265,5,0,1,0,0,0,0,0,,7/1/01,JDOHERTY,GLBA,H,1798.56581,0.719426324,0,6488337.847,431481.3414,6489238.889,433040.2594,,,
2001,1,265,17,0,1,0,0,0,0,0,,6/5/01,JDOHERTY,GLBA,H,425.16991,0.170067964,0,6491501.554,435348.6786,6491699.744,435710.8143,,,
2001,2,265,15,0,1,0,0,0,4,0,,6/7/01,JDOHERTY,GLBA,H,425.16991,0.170067964,0,6491501.554,435348.6786,6491699.744,435710.8143,,,
2001,3,266,5,0,1,0,0,0,0,0,,6/9/01,JDOHERTY,GLBA,H,1186.50099,0.474600396,0,6486447.867,428194.5771,6487041.615,429225.1316,,,
2001,4,266,5,0,1,0,0,0,0,0,,6/30/200,JDOHERTY,GLBA,H,1186.50099,0.474600396,0,6486447.867,428194.5771,6487041.615,429225.1316,,,
2001,5,266,5,0,1,0,0,0,0,0,,7/1/01,JDOHERTY,GLBA,H,1186.50099,0.474600396,0,6486447.867,428194.5771,6487041.615,429225.1316,,,
2001,1,266,17,0,1,0,0,0,0,0,,6/5/01,JDOHERTY,GLBA,H,2465.62714,0.986250856,0,6491122.334,444305.055,6492373.008,446446.362,,,
2001,2,266,15,0,1,0,0,0,0,0,,6/7/01,JDOHERTY,GLBA,H,2465.62714,0.986250856,0,6491122.334,444305.055,6492373.008,446446.362,,,
2001,3,267,5,0,1,0,0,0,0,0,,6/9/01,JDOHERTY,GLBA,H,547.66822,0.219067288,0,6485457.455,436074.402,6485728.204,436545.0727,,,
2001,4,267,5,0,1,0,0,0,0,0,,6/30/200,JDOHERTY,GLBA,H,547.66822,0.219067288,0,6485457.455,436074.402,6485728.204,436545.0727,,,
2001,5,267,5,1,1,1,0,1,0,0,94,7/1/01,JDOHERTY,GLBA,H,547.66822,0.219067288,0,6485457.455,436074.402,6485728.204,436545.0727,436612.8038,6485298.185,20011094
2001,1,267,17,0,1,0,0,0,0,0,,6/5/01,JDOHERTY,GLBA,H,1099.88969,0.439955876,0,6490478.008,447962.8082,6491022.152,448920.5909,,,
2001,2,267,15,0,1,0,0,0,0,0,,6/7/01,JDOHERTY,GLBA,H,1099.88969,0.439955876,0,6490478.008,447962.8082,6491022.152,448920.5909,,,
2001,3,268,5,0,1,0,0,0,0,0,,6/9/01,JDOHERTY,GLBA,H,914.25569,0.365702276,0,6485130.83,440304.7421,6485582.807,441098.426,,,
2001,4,268,5,0,1,0,0,0,0,0,,6/30/200,JDOHERTY,GLBA,H,914.25569,0.365702276,0,6485130.83,440304.7421,6485582.807,441098.426,,,
2001,5,268,5,0,1,0,0,0,0,0,,7/1/01,JDOHERTY,GLBA,H,914.25569,0.365702276,0,6485130.83,440304.7421,6485582.807,441098.426,,,
2001,1,268,17,0,1,0,0,0,0,0,,6/5/01,JDOHERTY,GLBA,H,461.66532,0.184666128,0,6490418.984,433497.0694,6490653.622,433889.1254,,,
2001,2,268,15,0,1,0,0,0,4,0,,6/7/01,JDOHERTY,GLBA,H,461.66532,0.184666128,0,6490418.984,433497.0694,6490653.622,433889.1254,,,
2001,3,269,5,0,1,0,0,0,0,0,,6/9/01,JDOHERTY,GLBA,H,834.53334,0.333813336,0,6484055.56,448032.7875,6484472.875,448757.2787,,,
2001,4,269,5,0,1,0,0,0,0,0,,6/30/200,JDOHERTY,GLBA,H,834.53334,0.333813336,0,6484055.56,448032.7875,6484472.875,448757.2787,,,
2001,5,269,5,0,1,0,0,0,4,0,,7/1/01,JDOHERTY,GLBA,H,834.53334,0.333813336,0,6484055.56,448032.7875,6484472.875,448757.2787,,,
2001,1,269,17,1,1,2,0,2,0,0,12,6/5/01,JDOHERTY,GLBA,H,2499.63264,0.999853056,0,6489619.964,441692.8654,6490868.935,443855.2393,442858.2781,6490335.521,20011012
2001,1,269,17,2,1,1,0,1,0,0,,6/5/01,JDOHERTY,GLBA,H,2499.63264,0.999853056,0,6489619.964,441692.8654,6490868.935,443855.2393,442425.7646,6490003.592,
2001,1,269,17,3,1,1,0,1,0,0,,6/5/01,JDOHERTY,GLBA,H,2499.63264,0.999853056,0,6489619.964,441692.8654,6490868.935,443855.2393,442144.1267,6489842.656,
2001,1,269,17,4,1,17,0,17,0,0,,6/5/01,JDOHERTY,GLBA,H,2499.63264,0.999853056,0,6489619.964,441692.8654,6490868.935,443855.2393,441832.3145,6489681.721,
2001,2,269,15,1,1,1,0,1,0,0,27,6/7/01,JDOHERTY,GLBA,H,2499.63264,0.999853056,0,6489619.964,441692.8654,6490868.935,443855.2393,443477.7068,6490165.134,20011027
2001,2,269,15,2,1,1,0,1,0,0,,6/7/01,JDOHERTY,GLBA,H,2499.63264,0.999853056,0,6489619.964,441692.8654,6490868.935,443855.2393,442654.4357,6489711.495,
2001,3,270,5,0,1,0,0,0,0,0,,6/9/01,JDOHERTY,GLBA,H,574.54969,0.229819876,0,6483493.074,447072.9515,6483783.306,447572.4597,,,
2001,4,270,5,0,1,0,0,0,0,0,,6/30/200,JDOHERTY,GLBA,H,574.54969,0.229819876,0,6483493.074,447072.9515,6483783.306,447572.4597,,,
2001,5,270,5,0,1,0,0,0,4,0,,7/1/01,JDOHERTY,GLBA,H,574.54969,0.229819876,0,6483493.074,447072.9515,6483783.306,447572.4597,,,
2001,1,270,17,0,1,0,0,0,0,0,,6/5/01,JDOHERTY,GLBA,H,400.2687,0.16010748,0,6486295.15,435922.9736,6486493.553,436275.8416,,,
2001,2,270,15,0,1,0,0,0,4,0,,6/7/01,JDOHERTY,GLBA,H,400.2687,0.16010748,0,6486295.15,435922.9736,6486493.553,436275.8416,,,
2001,3,271,5,0,1,0,0,0,0,0,,6/9/01,JDOHERTY,GLBA,H,568.0372,0.22721488,0,6482640.911,445603.3932,6482930.956,446103.1203,,,
2001,4,271,5,0,1,0,0,0,0,0,,6/30/200,JDOHERTY,GLBA,H,568.0372,0.22721488,0,6482640.911,445603.3932,6482930.956,446103.1203,,,
2001,5,271,5,0,1,0,0,0,4,0,,7/1/01,JDOHERTY,GLBA,H,568.0372,0.22721488,0,6482640.911,445603.3932,6482930.956,446103.1203,,,
2001,1,271,17,0,1,0,0,0,0,0,,6/5/01,JDOHERTY,GLBA,H,740.1014,0.29604056,0,6486108.418,450012.0369,6486471.53,450647.8566,,,
2001,2,271,15,0,1,0,0,0,0,0,,6/7/01,JDOHERTY,GLBA,H,740.1014,0.29604056,0,6486108.418,450012.0369,6486471.53,450647.8566,,,
2001,3,272,5,0,1,0,0,0,0,0,,6/9/01,JDOHERTY,GLBA,H,946.33788,0.378535152,0,6481743.627,448838.2421,6482215.511,449660.9761,,,
2001,4,272,5,0,1,0,0,0,0,0,,6/30/200,JDOHERTY,GLBA,H,946.33788,0.378535152,0,6481743.627,448838.2421,6482215.511,449660.9761,,,
2001,5,272,5,0,1,0,0,0,4,0,,7/1/01,JDOHERTY,GLBA,H,946.33788,0.378535152,0,6481743.627,448838.2421,6482215.511,449660.9761,,,
2001,1,272,17,0,1,0,0,0,0,0,,6/5/01,JDOHERTY,GLBA,H,480.64539,0.192258156,0,6485678.618,439681.7275,6485932.134,440093.5671,,,
2001,2,272,15,0,1,0,0,0,0,0,,6/7/01,JDOHERTY,GLBA,H,480.64539,0.192258156,0,6485678.618,439681.7275,6485932.134,440093.5671,,,
2001,3,273,5,0,1,0,0,0,0,0,,6/9/01,JDOHERTY,GLBA,H,1351.44499,0.540577996,0,6480666.585,437367.5694,6481334.675,438545.1527,,,
2001,4,273,5,1,1,1,1,2,0,0,68,6/30/200,JDOHERTY,GLBA,H,1351.44499,0.540577996,0,6480666.585,437367.5694,6481334.675,438545.1527,437837.3349,6480919.519,20011068
2001,5,273,5,1,1,1,1,2,0,0,91,7/1/01,JDOHERTY,GLBA,H,1351.44499,0.540577996,0,6480666.585,437367.5694,6481334.675,438545.1527,437907.8329,6480503.646,20011091
2001,1,273,17,0,1,0,0,0,0,0,,6/5/01,JDOHERTY,GLBA,H,830.5974,0.33223896,0,6485019.569,448113.5777,6485436.898,448837.8849,,,
2001,2,273,15,0,1,0,0,0,0,0,,6/7/01,JDOHERTY,GLBA,H,830.5974,0.33223896,0,6485019.569,448113.5777,6485436.898,448837.8849,,,
2001,3,274,5,0,1,0,0,0,0,0,,6/9/01,JDOHERTY,GLBA,H,484.09414,0.193637656,0,6480558.286,441995.4366,6480793.348,442417.0986,,,
2001,4,274,5,0,1,0,0,0,0,0,,6/30/200,JDOHERTY,GLBA,H,484.09414,0.193637656,0,6480558.286,441995.4366,6480793.348,442417.0986,,,
2001,5,274,5,0,1,0,0,0,0,0,,7/1/01,JDOHERTY,GLBA,H,484.09414,0.193637656,0,6480558.286,441995.4366,6480793.348,442417.0986,,,
2001,1,274,17,0,1,0,0,0,0,0,,6/5/01,JDOHERTY,GLBA,H,1694.05026,0.677620104,0,6483913.214,446204.0856,6484765.6,447673.0411,,,
2001,2,274,15,0,1,0,0,0,0,0,,6/7/01,JDOHERTY,GLBA,H,1694.05026,0.677620104,0,6483913.214,446204.0856,6484765.6,447673.0411,,,
2001,3,275,5,0,1,0,0,0,0,0,,6/9/01,JDOHERTY,GLBA,H,2067.35367,0.826941468,0,6479947.763,445750.8299,6480981.237,447544.6881,,,
2001,4,275,5,0,1,0,0,0,0,0,,6/30/200,JDOHERTY,GLBA,H,2067.35367,0.826941468,0,6479947.763,445750.8299,6480981.237,447544.6881,,,
2001,5,275,5,0,1,0,0,0,2,0,,7/1/01,JDOHERTY,GLBA,H,2067.35367,0.826941468,0,6479947.763,445750.8299,6480981.237,447544.6881,,,
2001,1,275,17,0,1,0,0,0,0,0,,6/5/01,JDOHERTY,GLBA,H,903.53255,0.36141302,0,6483420.969,435759.2945,6483872.185,436544.1455,,,
2001,2,275,15,0,1,0,0,0,0,0,,6/7/01,JDOHERTY,GLBA,H,903.53255,0.36141302,0,6483420.969,435759.2945,6483872.185,436544.1455,,,
2001,3,276,5,0,1,0,0,0,0,0,,6/9/01,JDOHERTY,GLBA,H,665.91858,0.266367432,0,6477990.891,437558.4252,6478334.506,438128.3313,,,
2001,4,276,5,0,1,0,0,0,0,0,,6/30/200,JDOHERTY,GLBA,H,665.91858,0.266367432,0,6477990.891,437558.4252,6478334.506,438128.3313,,,
2001,5,276,5,0,1,0,0,0,0,0,,7/1/01,JDOHERTY,GLBA,H,665.91858,0.266367432,0,6477990.891,437558.4252,6478334.506,438128.3313,,,
2001,1,276,17,0,1,0,0,0,1,0,,6/5/01,JDOHERTY,GLBA,H,8887.73854,3.555095416,0,6483130.237,440050.6932,6487567.165,447739.605,,,
2001,2,276,15,1,1,1,0,1,0,0,22,6/7/01,JDOHERTY,GLBA,H,8887.73854,3.555095416,0,6483130.237,440050.6932,6487567.165,447739.605,446216.3443,6486216.792,20011022
2001,3,277,5,0,1,0,0,0,0,0,,6/9/01,JDOHERTY,GLBA,H,1956.20555,0.78248222,0,6477272.92,445918.2496,6478252.233,447605.4978,,,
2001,4,277,5,0,1,0,0,0,0,0,,6/30/200,JDOHERTY,GLBA,H,1956.20555,0.78248222,0,6477272.92,445918.2496,6478252.233,447605.4978,,,
2001,5,277,5,0,1,0,0,0,0,0,,7/1/01,JDOHERTY,GLBA,H,1956.20555,0.78248222,0,6477272.92,445918.2496,6478252.233,447605.4978,,,
2001,1,277,17,0,1,0,0,0,0,0,,6/5/01,JDOHERTY,GLBA,H,596.65433,0.238661732,0,6481485.665,437215.3439,6481793.045,437725.8716,,,
2001,2,277,15,1,1,1,0,1,0,0,37,6/7/01,JDOHERTY,GLBA,H,596.65433,0.238661732,0,6481485.665,437215.3439,6481793.045,437725.8716,437361.9784,6481554.389,20011037
2001,3,278,5,0,1,0,0,0,0,0,,6/9/01,JDOHERTY,GLBA,H,419.78401,0.167913604,0,6475622.822,438251.1435,6475839.84,438614.8551,,,
2001,4,278,5,0,1,0,0,0,0,0,,6/30/200,JDOHERTY,GLBA,H,419.78401,0.167913604,0,6475622.822,438251.1435,6475839.84,438614.8551,,,
2001,5,278,5,0,1,0,0,0,0,0,,7/1/01,JDOHERTY,GLBA,H,419.78401,0.167913604,0,6475622.822,438251.1435,6475839.84,438614.8551,,,
2001,1,278,17,0,1,0,0,0,0,0,,6/5/01,JDOHERTY,GLBA,H,1133.8607,0.45354428,0,6480834.909,440871.4049,6481395.593,441852.241,,,
2001,2,278,15,0,1,0,0,0,0,0,,6/7/01,JDOHERTY,GLBA,H,1133.8607,0.45354428,0,6480834.909,440871.4049,6481395.593,441852.241,,,
2001,3,279,5,0,1,0,0,0,0,0,,6/9/01,JDOHERTY,GLBA,H,1440.3299,0.57613196,0,6474707.028,446262.7713,6475413.984,447509.1869,,,
2001,4,279,5,0,1,0,0,0,0,0,,6/30/200,JDOHERTY,GLBA,H,1440.3299,0.57613196,0,6474707.028,446262.7713,6475413.984,447509.1869,,,
2001,5,279,5,0,1,0,0,0,0,0,,7/1/01,JDOHERTY,GLBA,H,1440.3299,0.57613196,0,6474707.028,446262.7713,6475413.984,447509.1869,,,
2001,1,279,17,1,1,1,0,1,0,0,2,6/5/01,JDOHERTY,GLBA,H,800.37888,0.320151552,0,6479498.851,443370.9305,6479897.17,444067.3199,443733.3652,6479713.777,20011002
2001,2,279,15,0,1,0,0,0,0,0,,6/7/01,JDOHERTY,GLBA,H,800.37888,0.320151552,0,6479498.851,443370.9305,6479897.17,444067.3199,,,
2001,3,280,5,1,1,1,0,1,0,3,46,6/9/01,JDOHERTY,GLBA,H,935.74999,0.374299996,0,6472875.264,438295.6716,6473345.247,439102.0547,438888.4201,6472756.335,20011046
2001,4,280,5,1,1,2,0,2,0,2,65,6/30/200,JDOHERTY,GLBA,H,935.74999,0.374299996,0,6472875.264,438295.6716,6473345.247,439102.0547,439273.1351,6472964.022,20011065
2001,4,280,5,2,1,2,0,2,0,2,65,6/30/200,JDOHERTY,GLBA,H,935.74999,0.374299996,0,6472875.264,438295.6716,6473345.247,439102.0547,439192.8268,6472923.868,20012065
2001,4,280,5,3,1,2,0,2,0,2,65,6/30/200,JDOHERTY,GLBA,H,935.74999,0.374299996,0,6472875.264,438295.6716,6473345.247,439102.0547,439099.1337,6472865.867,20013065
2001,4,280,5,4,1,1,1,2,0,2,,6/30/200,JDOHERTY,GLBA,H,935.74999,0.374299996,0,6472875.264,438295.6716,6473345.247,439102.0547,438902.8242,6472856.944,
2001,4,280,5,5,1,1,1,2,0,2,,6/30/200,JDOHERTY,GLBA,H,935.74999,0.374299996,0,6472875.264,438295.6716,6473345.247,439102.0547,438956.3633,6472682.943,
2001,4,280,5,6,1,1,1,2,0,2,,6/30/200,JDOHERTY,GLBA,H,935.74999,0.374299996,0,6472875.264,438295.6716,6473345.247,439102.0547,438710.9766,6472772.174,
2001,4,280,5,7,1,1,0,1,0,2,,6/30/200,JDOHERTY,GLBA,H,935.74999,0.374299996,0,6472875.264,438295.6716,6473345.247,439102.0547,438800.208,6472607.096,
2001,5,280,5,1,1,1,1,2,0,0,85,7/1/01,JDOHERTY,GLBA,H,935.74999,0.374299996,0,6472875.264,438295.6716,6473345.247,439102.0547,438913.6804,6472762.813,20011085
2001,1,280,17,0,1,0,0,0,0,0,,6/5/01,JDOHERTY,GLBA,H,1331.42459,0.532569836,0,6478599.741,446607.9192,6479270.857,447765.0242,,,
2001,2,280,15,0,1,0,0,0,0,0,,6/7/01,JDOHERTY,GLBA,H,1331.42459,0.532569836,0,6478599.741,446607.9192,6479270.857,447765.0242,,,
2001,3,281,5,0,1,0,0,0,3,0,,6/9/01,JDOHERTY,GLBA,H,439.92882,0.175971528,0,6471651.777,445753.1171,6471869.221,446136.2496,,,
2001,4,281,5,0,1,0,0,0,0,0,,6/30/200,JDOHERTY,GLBA,H,439.92882,0.175971528,0,6471651.777,445753.1171,6471869.221,446136.2496,,,
2001,5,281,5,0,1,0,0,0,0,0,,7/1/01,JDOHERTY,GLBA,H,439.92882,0.175971528,0,6471651.777,445753.1171,6471869.221,446136.2496,,,
2001,1,281,17,1,1,1,1,2,0,0,3,6/5/01,JDOHERTY,GLBA,H,1148.86754,0.459547016,0,6478593.522,437013.337,6479171.647,438005.3131,437185.3018,6478707.931,20011003
2001,2,281,15,1,1,1,0,1,0,0,38,6/7/01,JDOHERTY,GLBA,H,1148.86754,0.459547016,0,6478593.522,437013.337,6479171.647,438005.3131,437529.9931,6478891.358,20011038
2001,4,282,5,0,1,0,0,0,0,0,,6/30/200,JDOHERTY,GLBA,H,1597.67241,0.639068964,0,6468085.399,439586.5123,6468881.122,440964.405,,,
2001,5,282,5,0,1,0,0,0,0,0,,7/1/01,JDOHERTY,GLBA,H,1597.67241,0.639068964,0,6468085.399,439586.5123,6468881.122,440964.405,,,
2001,1,282,17,0,1,0,0,0,0,0,,6/5/01,JDOHERTY,GLBA,H,677.14523,0.270858092,0,6476388.345,437961.3437,6476713.159,438550.6165,,,
2001,2,282,15,0,1,0,0,0,0,0,,6/7/01,JDOHERTY,GLBA,H,677.14523,0.270858092,0,6476388.345,437961.3437,6476713.159,438550.6165,,,
2001,1,283,17,0,1,0,0,0,0,0,,6/5/01,JDOHERTY,GLBA,H,1401.08251,0.560433004,0,6475544.166,446118.4125,6476251.467,447335.3909,,,
2001,2,283,15,0,1,0,0,0,3,0,,6/7/01,JDOHERTY,GLBA,H,1401.08251,0.560433004,0,6475544.166,446118.4125,6476251.467,447335.3909,,,
2001,4,284,5,0,1,0,0,0,0,0,,6/30/200,JDOHERTY,GLBA,H,2911.8956,1.16475824,0,6466156.807,445862.8311,6467626.154,448390.6758,,,
2001,5,284,5,0,1,0,0,0,0,0,,7/1/01,JDOHERTY,GLBA,H,2911.8956,1.16475824,0,6466156.807,445862.8311,6467626.154,448390.6758,,,
2001,1,284,17,1,1,3,0,3,0,0,,6/5/01,JDOHERTY,GLBA,H,1105.21673,0.442086692,0,6473676.662,438084.1527,6474236.959,439047.674,438241.4407,6473829.573,
2001,1,284,17,2,1,4,0,4,0,0,,6/5/01,JDOHERTY,GLBA,H,1105.21673,0.442086692,0,6473676.662,438084.1527,6474236.959,439047.674,438311.8503,6473718.93,
2001,1,284,17,3,1,2,0,2,0,0,,6/5/01,JDOHERTY,GLBA,H,1105.21673,0.442086692,0,6473676.662,438084.1527,6474236.959,439047.674,438432.552,6473920.099,
2001,1,284,17,4,1,1,0,1,0,0,,6/5/01,JDOHERTY,GLBA,H,1105.21673,0.442086692,0,6473676.662,438084.1527,6474236.959,439047.674,438492.9026,6473839.631,
2001,1,284,17,5,1,85,30,115,0,0,,6/5/01,JDOHERTY,GLBA,H,1105.21673,0.442086692,1,6473676.662,438084.1527,6474236.959,439047.674,438903.8201,6474143.642,
2001,2,284,15,1,1,76,54,130,0,0,,6/7/01,JDOHERTY,GLBA,H,1105.21673,0.442086692,1,6473676.662,438084.1527,6474236.959,439047.674,438900.8285,6474145.521,
2001,2,284,15,2,1,6,5,11,0,0,,6/7/01,JDOHERTY,GLBA,H,1105.21673,0.442086692,1,6473676.662,438084.1527,6474236.959,439047.674,438900.8285,6473968.827,
2001,1,285,17,0,1,0,0,0,0,0,,6/5/01,JDOHERTY,GLBA,H,956.96847,0.382787388,0,6472688.206,445962.3095,6473159.36,446797.0063,,,
2001,2,285,15,0,1,0,0,0,0,0,,6/7/01,JDOHERTY,GLBA,H,956.96847,0.382787388,0,6472688.206,445962.3095,6473159.36,446797.0063,,,
2001,1,286,17,0,1,0,0,0,0,0,,6/5/01,JDOHERTY,GLBA,H,558.1025,0.223241,0,6471543.727,439181.3868,6471814.703,439663.2145,,,
2001,2,286,15,0,1,0,0,0,0,0,,6/7/01,JDOHERTY,GLBA,H,558.1025,0.223241,0,6471543.727,439181.3868,6471814.703,439663.2145,,,
2001,1,287,17,0,1,0,0,0,0,0,,6/5/01,JDOHERTY,GLBA,H,674.7269,0.26989076,0,6471074.032,438355.158,6471417.614,438935.7185,,,
2001,2,287,15,0,1,0,0,0,0,0,,6/7/01,JDOHERTY,GLBA,H,674.7269,0.26989076,0,6471074.032,438355.158,6471417.614,438935.7185,,,
2001,1,288,17,0,1,0,0,0,0,0,,6/5/01,JDOHERTY,GLBA,H,499.05834,0.199623336,0,6469879.135,450711.837,6470133.567,451144.0641,,,
2001,2,288,15,1,1,1,0,1,2,0,42,6/7/01,JDOHERTY,GLBA,H,499.05834,0.199623336,0,6469879.135,450711.837,6470133.567,451144.0641,450929.1532,6470011.79,20011042
2001,1,289,17,3,1,1,0,1,0,0,,6/5/01,JDOHERTY,GLBA,H,4671.62113,1.868648452,0,6469741.232,445678.014,6472081.532,449725.8135,448038.3904,6471103.728,
2001,1,289,17,1,1,1,0,1,0,0,20,6/5/01,JDOHERTY,GLBA,H,4671.62113,1.868648452,0,6469741.232,445678.014,6472081.532,449725.8135,446901.7835,6470449.927,20011020
2001,1,289,17,2,1,1,0,1,0,0,20,6/5/01,JDOHERTY,GLBA,H,4671.62113,1.868648452,0,6469741.232,445678.014,6472081.532,449725.8135,447052.6606,6470429.81,20012020
2001,2,289,15,1,1,2,0,2,2,0,40,6/7/01,JDOHERTY,GLBA,H,4671.62113,1.868648452,0,6469741.232,445678.014,6472081.532,449725.8135,448215.7182,6471112.285,20011040
2001,2,289,15,2,1,2,0,2,2,0,40,6/7/01,JDOHERTY,GLBA,H,4671.62113,1.868648452,0,6469741.232,445678.014,6472081.532,449725.8135,448156.9135,6471196.292,20012040
2001,2,289,15,5,1,1,0,1,2,0,,6/7/01,JDOHERTY,GLBA,H,4671.62113,1.868648452,0,6469741.232,445678.014,6472081.532,449725.8135,447770.4795,6471070.282,
2001,2,289,15,6,1,1,0,1,2,0,,6/7/01,JDOHERTY,GLBA,H,4671.62113,1.868648452,0,6469741.232,445678.014,6472081.532,449725.8135,447661.2703,6471019.877,
2001,2,289,15,7,1,1,0,1,2,0,,6/7/01,JDOHERTY,GLBA,H,4671.62113,1.868648452,0,6469741.232,445678.014,6472081.532,449725.8135,447568.8621,6470977.874,
2001,2,289,15,8,1,1,0,1,2,0,,6/7/01,JDOHERTY,GLBA,H,4671.62113,1.868648452,0,6469741.232,445678.014,6472081.532,449725.8135,447476.4539,6470919.068,
2001,2,289,15,9,1,1,0,1,2,0,,6/7/01,JDOHERTY,GLBA,H,4671.62113,1.868648452,0,6469741.232,445678.014,6472081.532,449725.8135,447367.2449,6470860.263,
2001,2,289,15,10,1,1,0,1,2,0,,6/7/01,JDOHERTY,GLBA,H,4671.62113,1.868648452,0,6469741.232,445678.014,6472081.532,449725.8135,447207.6307,6470767.855,
2001,2,289,15,11,1,3,0,3,2,0,,6/7/01,JDOHERTY,GLBA,H,4671.62113,1.868648452,0,6469741.232,445678.014,6472081.532,449725.8135,447157.2265,6470557.837,
2001,2,289,15,3,1,1,0,1,2,0,40,6/7/01,JDOHERTY,GLBA,H,4671.62113,1.868648452,0,6469741.232,445678.014,6472081.532,449725.8135,448215.7182,6471280.3,20013040
2001,2,289,15,4,1,1,0,1,2,0,40,6/7/01,JDOHERTY,GLBA,H,4671.62113,1.868648452,0,6469741.232,445678.014,6472081.532,449725.8135,448299.7255,6471330.704,20014040
2001,1,290,17,0,1,0,0,0,4,0,,6/5/01,JDOHERTY,GLBA,H,720.91028,0.288364112,0,6468688.033,439020.1821,6469030.967,439649.7885,,,
2001,2,290,15,0,1,0,0,0,4,0,,6/7/01,JDOHERTY,GLBA,H,720.91028,0.288364112,0,6468688.033,439020.1821,6469030.967,439649.7885,,,
2001,1,292,17,0,1,0,0,0,2,0,,6/5/01,JDOHERTY,GLBA,H,3409.4728,1.36378912,0,6466903.594,445541.2702,6468608.449,448491.3385,,,
2001,2,292,15,0,1,0,0,0,4,0,,6/7/01,JDOHERTY,GLBA,H,3409.4728,1.36378912,0,6466903.594,445541.2702,6468608.449,448491.3385,,,
2001,1,293,17,0,1,0,0,0,0,0,,6/5/01,JDOHERTY,GLBA,H,1484.31103,0.593724412,0,6466772.283,440503.3493,6467513.958,441792.8742,,,
2001,2,293,15,0,1,0,0,0,4,0,,6/7/01,JDOHERTY,GLBA,H,1484.31103,0.593724412,0,6466772.283,440503.3493,6467513.958,441792.8742,,,
2001,1,296,17,0,1,0,0,0,0,0,,6/5/01,JDOHERTY,GLBA,H,708.69122,0.283476488,0,6482616.772,448771.8766,6482980.061,449379.219,,,
2001,2,296,15,0,1,0,0,0,0,0,,6/7/01,JDOHERTY,GLBA,H,708.69122,0.283476488,0,6482616.772,448771.8766,6482980.061,449379.219,,,
2001,3,301,5,0,1,0,0,0,0,0,,6/9/01,JDOHERTY,GLBA,H,4910.87438,1.964349752,0,6508738.191,438019.2744,6511196.809,442275.5513,,,
2001,4,301,5,0,1,0,0,0,0,0,,6/30/200,JDOHERTY,GLBA,H,4910.87438,1.964349752,0,6508738.191,438019.2744,6511196.809,442275.5513,,,
2001,5,301,5,0,1,0,0,0,0,0,,7/1/01,JDOHERTY,GLBA,H,4910.87438,1.964349752,0,6508738.191,438019.2744,6511196.809,442275.5513,,,
2001,3,302,5,0,1,0,0,0,0,0,,6/9/01,JDOHERTY,GLBA,H,4033.88951,1.613555804,0,6502285.013,441224.1801,6504294.021,444715.2571,,,
2001,4,302,5,0,1,0,0,0,0,0,,6/30/200,JDOHERTY,GLBA,H,4033.88951,1.613555804,0,6502285.013,441224.1801,6504294.021,444715.2571,,,
2001,5,302,5,0,1,0,0,0,2,0,,7/1/01,JDOHERTY,GLBA,H,4033.88951,1.613555804,0,6502285.013,441224.1801,6504294.021,444715.2571,,,
2001,3,303,5,0,1,0,0,0,0,0,,6/9/01,JDOHERTY,GLBA,H,1800.65297,0.720261188,0,6500820.302,438715.3941,6501724.202,440267.7146,,,
2001,4,303,5,0,1,0,0,0,0,0,,6/30/200,JDOHERTY,GLBA,H,1800.65297,0.720261188,0,6500820.302,438715.3941,6501724.202,440267.7146,,,
2001,5,303,5,0,1,0,0,0,0,0,,7/2/01,JDOHERTY,GLBA,H,1800.65297,0.720261188,0,6500820.302,438715.3941,6501724.202,440267.7146,,,
2001,3,304,5,0,1,0,0,0,0,0,,6/9/01,JDOHERTY,GLBA,H,2772.3675,1.108947,0,6498212.592,429388.5572,6499599.126,431785.2048,,,
2001,4,304,5,0,1,0,0,0,4,0,,6/30/200,JDOHERTY,GLBA,H,2772.3675,1.108947,0,6498212.592,429388.5572,6499599.126,431785.2048,,,
2001,5,304,5,0,1,0,0,0,4,0,,7/1/01,JDOHERTY,GLBA,H,2772.3675,1.108947,0,6498212.592,429388.5572,6499599.126,431785.2048,,,
2001,3,305,5,0,1,0,0,0,0,0,,6/9/01,JDOHERTY,GLBA,H,3232.46985,1.29298794,0,6494404.205,441977.4501,6496015.482,444771.9969,,,
2001,4,305,5,2,1,1,1,2,4,0,,6/30/200,JDOHERTY,GLBA,H,3232.46985,1.29298794,0,6494404.205,441977.4501,6496015.482,444771.9969,443421.8282,6495303.568,
2001,4,305,5,1,1,1,0,1,4,0,77,6/30/200,JDOHERTY,GLBA,H,3232.46985,1.29298794,0,6494404.205,441977.4501,6496015.482,444771.9969,442344.734,6494582.711,20011077
2001,5,305,5,2,1,1,0,1,4,2,,7/1/01,JDOHERTY,GLBA,H,3232.46985,1.29298794,0,6494404.205,441977.4501,6496015.482,444771.9969,444722.4116,6495528.856,
2001,5,305,5,1,1,1,1,2,4,2,99,7/1/01,JDOHERTY,GLBA,H,3232.46985,1.29298794,0,6494404.205,441977.4501,6496015.482,444771.9969,442361.2723,6494158.592,20011099
2001,1,305,17,0,1,0,0,0,0,0,,6/5/01,JDOHERTY,GLBA,H,1385.71525,0.5542861,0,6509756.47,438180.3341,6510461.288,439388.3958,,,
2001,2,305,15,0,1,0,0,0,2,0,,6/7/01,JDOHERTY,GLBA,H,1385.71525,0.5542861,0,6509756.47,438180.3341,6510461.288,439388.3958,,,
2001,3,306,5,0,1,0,0,0,0,0,,6/9/01,JDOHERTY,GLBA,H,4870.00471,1.948001884,0,6494065.344,446198.1943,6496496.434,450415.9652,,,
2001,4,306,5,0,1,0,0,0,4,0,,6/30/200,JDOHERTY,GLBA,H,4870.00471,1.948001884,0,6494065.344,446198.1943,6496496.434,450415.9652,,,
2001,5,306,5,0,1,0,0,0,2,2,,7/1/01,JDOHERTY,GLBA,H,4870.00471,1.948001884,0,6494065.344,446198.1943,6496496.434,450415.9652,,,
2001,3,307,5,1,1,1,0,1,0,0,,6/9/01,JDOHERTY,GLBA,H,6556.88033,2.622752132,0,6490553.397,440106.0983,6493829.88,445778.1674,441228.8342,6491320.535,
2001,3,307,5,3,1,119,0,119,0,0,,6/9/01,JDOHERTY,GLBA,H,6556.88033,2.622752132,1,6490553.397,440106.0983,6493829.88,445778.1674,440758.9632,6490911.76,
2001,3,307,5,2,1,1,0,1,0,0,55,6/9/01,JDOHERTY,GLBA,H,6556.88033,2.622752132,0,6490553.397,440106.0983,6493829.88,445778.1674,441718.6486,6491454.12,20012055
2001,4,307,5,1,1,1,0,1,0,0,,6/30/200,JDOHERTY,GLBA,H,6556.88033,2.622752132,0,6490553.397,440106.0983,6493829.88,445778.1674,440123.489,6490609.616,
2001,4,307,5,2,1,1,0,1,0,0,,6/30/200,JDOHERTY,GLBA,H,6556.88033,2.622752132,0,6490553.397,440106.0983,6493829.88,445778.1674,440312.0852,6490500.649,
2001,4,307,5,3,1,1,0,1,0,0,,6/30/200,JDOHERTY,GLBA,H,6556.88033,2.622752132,0,6490553.397,440106.0983,6493829.88,445778.1674,440437.8162,6490743.729,
2001,4,307,5,6,1,215,0,215,0,0,,6/30/200,JDOHERTY,GLBA,H,6556.88033,2.622752132,1,6490553.397,440106.0983,6493829.88,445778.1674,440732.14,6490905.502,
2001,4,307,5,4,1,1,1,2,0,0,76,6/30/200,JDOHERTY,GLBA,H,6556.88033,2.622752132,0,6490553.397,440106.0983,6493829.88,445778.1674,441037.1334,6491104.157,20014076
2001,4,307,5,5,1,1,1,2,0,0,76,6/30/200,JDOHERTY,GLBA,H,6556.88033,2.622752132,0,6490553.397,440106.0983,6493829.88,445778.1674,441208.9655,6491108.348,20015076
2001,5,307,5,4,1,1,1,2,3,3,,7/1/01,JDOHERTY,GLBA,H,6556.88033,2.622752132,0,6490553.397,440106.0983,6493829.88,445778.1674,440772.3014,6490556.627,
2001,5,307,5,5,1,1,1,2,3,3,,7/1/01,JDOHERTY,GLBA,H,6556.88033,2.622752132,0,6490553.397,440106.0983,6493829.88,445778.1674,440932.984,6490449.505,
2001,5,307,5,6,1,1,0,1,3,3,,7/1/01,JDOHERTY,GLBA,H,6556.88033,2.622752132,0,6490553.397,440106.0983,6493829.88,445778.1674,440959.7642,6490672.675,
2001,5,307,5,7,1,1,0,1,3,3,,7/1/01,JDOHERTY,GLBA,H,6556.88033,2.622752132,0,6490553.397,440106.0983,6493829.88,445778.1674,441075.8124,6490735.163,
2001,5,307,5,8,1,1,0,1,3,3,,7/1/01,JDOHERTY,GLBA,H,6556.88033,2.622752132,0,6490553.397,440106.0983,6493829.88,445778.1674,441174.0075,6490592.334,
2001,5,307,5,9,1,4,0,4,3,3,,7/1/01,JDOHERTY,GLBA,H,6556.88033,2.622752132,0,6490553.397,440106.0983,6493829.88,445778.1674,441611.4207,6490779.797,
2001,5,307,5,10,1,1,0,1,3,3,,7/1/01,JDOHERTY,GLBA,H,6556.88033,2.622752132,0,6490553.397,440106.0983,6493829.88,445778.1674,441638.2016,6491056.528,
2001,5,307,5,11,1,1,0,1,3,3,,7/1/01,JDOHERTY,GLBA,H,6556.88033,2.622752132,0,6490553.397,440106.0983,6493829.88,445778.1674,441754.2498,6490886.918,
2001,5,307,5,12,1,1,0,1,3,3,,7/1/01,JDOHERTY,GLBA,H,6556.88033,2.622752132,0,6490553.397,440106.0983,6493829.88,445778.1674,441763.1764,6491110.089,
2001,5,307,5,13,1,1,0,1,3,3,,7/1/01,JDOHERTY,GLBA,H,6556.88033,2.622752132,0,6490553.397,440106.0983,6493829.88,445778.1674,442022.0538,6491056.528,
2001,5,307,5,14,1,1,0,1,3,3,,7/1/01,JDOHERTY,GLBA,H,6556.88033,2.622752132,0,6490553.397,440106.0983,6493829.88,445778.1674,442164.8826,6491368.966,
2001,5,307,5,15,1,1,0,1,3,3,,7/1/01,JDOHERTY,GLBA,H,6556.88033,2.622752132,0,6490553.397,440106.0983,6493829.88,445778.1674,442441.6138,6491342.185,
2001,5,307,5,16,1,68,0,68,3,3,,7/1/01,JDOHERTY,GLBA,H,6556.88033,2.622752132,1,6490553.397,440106.0983,6493829.88,445778.1674,441281.333,6490838.445,
2001,5,307,5,17,1,11,0,11,3,3,,7/1/01,JDOHERTY,GLBA,H,6556.88033,2.622752132,1,6490553.397,440106.0983,6493829.88,445778.1674,441452.3267,6490768.036,
2001,5,307,5,1,1,1,1,2,3,3,98,7/1/01,JDOHERTY,GLBA,H,6556.88033,2.622752132,0,6490553.397,440106.0983,6493829.88,445778.1674,440433.0832,6490351.31,20011098
2001,5,307,5,2,1,1,0,1,3,3,98,7/1/01,JDOHERTY,GLBA,H,6556.88033,2.622752132,0,6490553.397,440106.0983,6493829.88,445778.1674,440575.9116,6490279.896,20012098
2001,5,307,5,3,1,1,1,2,3,3,98,7/1/01,JDOHERTY,GLBA,H,6556.88033,2.622752132,0,6490553.397,440106.0983,6493829.88,445778.1674,440593.7655,6490449.505,20013098
2001,1,307,17,0,1,0,0,0,0,0,,6/5/01,JDOHERTY,GLBA,H,1067.68121,0.427072484,0,6506231.8,441660.6191,6506756.409,442576.6105,,,
2001,2,307,15,0,1,0,0,0,1,0,,6/7/01,JDOHERTY,GLBA,H,1067.68121,0.427072484,0,6506231.8,441660.6191,6506756.409,442576.6105,,,
2001,3,308,5,4,1,1,0,1,0,0,,6/9/01,JDOHERTY,GLBA,H,6708.16777,2.683267108,0,6488131.097,440729.0699,6491480.855,446540.8118,441158.8611,6488451.621,
2001,3,308,5,5,1,1,0,1,0,0,,6/9/01,JDOHERTY,GLBA,H,6708.16777,2.683267108,0,6488131.097,440729.0699,6491480.855,446540.8118,441209.7507,6488324.397,
2001,3,308,5,6,1,1,0,1,0,0,,6/9/01,JDOHERTY,GLBA,H,6708.16777,2.683267108,0,6488131.097,440729.0699,6491480.855,446540.8118,441292.4466,6488527.956,
2001,3,308,5,7,1,1,0,1,0,0,,6/9/01,JDOHERTY,GLBA,H,6708.16777,2.683267108,0,6488131.097,440729.0699,6491480.855,446540.8118,441349.6978,6488407.093,
2001,3,308,5,8,1,1,0,1,0,0,,6/9/01,JDOHERTY,GLBA,H,6708.16777,2.683267108,0,6488131.097,440729.0699,6491480.855,446540.8118,441457.8385,6488483.428,
2001,3,308,5,9,1,2,0,2,0,0,,6/9/01,JDOHERTY,GLBA,H,6708.16777,2.683267108,0,6488131.097,440729.0699,6491480.855,446540.8118,441546.8959,6488585.207,
2001,3,308,5,10,1,1,0,1,0,0,,6/9/01,JDOHERTY,GLBA,H,6708.16777,2.683267108,0,6488131.097,440729.0699,6491480.855,446540.8118,441686.8427,6488572.484,
2001,3,308,5,11,1,1,0,1,0,0,,6/9/01,JDOHERTY,GLBA,H,6708.16777,2.683267108,0,6488131.097,440729.0699,6491480.855,446540.8118,441750.455,6488750.599,
2001,3,308,5,1,1,1,0,1,0,0,58,6/9/01,JDOHERTY,GLBA,H,6708.16777,2.683267108,0,6488131.097,440729.0699,6491480.855,446540.8118,440904.412,6488318.035,20011058
2001,3,308,5,2,1,1,0,1,0,0,58,6/9/01,JDOHERTY,GLBA,H,6708.16777,2.683267108,0,6488131.097,440729.0699,6491480.855,446540.8118,440891.6894,6488171.727,20012058
2001,3,308,5,3,1,1,0,1,0,0,58,6/9/01,JDOHERTY,GLBA,H,6708.16777,2.683267108,0,6488131.097,440729.0699,6491480.855,446540.8118,441025.2751,6488241.701,20013058
2001,4,308,5,1,1,1,0,1,0,0,74,6/30/200,JDOHERTY,GLBA,H,6708.16777,2.683267108,0,6488131.097,440729.0699,6491480.855,446540.8118,440856.9194,6488300.359,20011074
2001,4,308,5,2,1,1,0,1,0,0,74,6/30/200,JDOHERTY,GLBA,H,6708.16777,2.683267108,0,6488131.097,440729.0699,6491480.855,446540.8118,440911.4027,6488166.246,20012074
2001,4,308,5,3,1,1,0,1,0,0,74,6/30/200,JDOHERTY,GLBA,H,6708.16777,2.683267108,0,6488131.097,440729.0699,6491480.855,446540.8118,440986.8411,6488304.55,20013074
2001,4,308,5,4,1,1,0,1,0,0,74,6/30/200,JDOHERTY,GLBA,H,6708.16777,2.683267108,0,6488131.097,440729.0699,6491480.855,446540.8118,441066.4708,6488153.673,20014074
2001,4,308,5,5,1,2,0,2,0,0,,6/30/200,JDOHERTY,GLBA,H,6708.16777,2.683267108,0,6488131.097,440729.0699,6491480.855,446540.8118,441364.0338,6488493.147,
2001,4,308,5,6,1,1,0,1,0,0,,6/30/200,JDOHERTY,GLBA,H,6708.16777,2.683267108,0,6488131.097,440729.0699,6491480.855,446540.8118,441649.0235,6488618.878,
2001,4,308,5,7,1,1,0,1,0,0,,6/30/200,JDOHERTY,GLBA,H,6708.16777,2.683267108,0,6488131.097,440729.0699,6491480.855,446540.8118,441921.4406,6488765.564,
2001,4,308,5,8,1,1,0,1,0,0,,6/30/200,JDOHERTY,GLBA,H,6708.16777,2.683267108,0,6488131.097,440729.0699,6491480.855,446540.8118,442198.0481,6488912.249,
2001,5,308,5,1,1,1,1,2,0,3,,7/1/01,JDOHERTY,GLBA,H,6708.16777,2.683267108,0,6488131.097,440729.0699,6491480.855,446540.8118,441664.9828,6488342.779,
2001,5,308,5,2,1,1,0,1,0,3,,7/1/01,JDOHERTY,GLBA,H,6708.16777,2.683267108,0,6488131.097,440729.0699,6491480.855,446540.8118,442013.1282,6488539.169,
2001,5,308,5,4,1,20,7,27,0,3,,7/1/01,JDOHERTY,GLBA,H,6708.16777,2.683267108,1,6488131.097,440729.0699,6491480.855,446540.8118,441180.7482,6487951.664,
2001,5,308,5,3,1,1,1,2,0,3,96,7/1/01,JDOHERTY,GLBA,H,6708.16777,2.683267108,0,6488131.097,440729.0699,6491480.855,446540.8118,442272.0049,6488565.95,20013096
2001,3,309,5,0,1,0,0,0,0,0,,6/9/01,JDOHERTY,GLBA,H,1221.35242,0.488540968,0,6486960.273,433875.2105,6487573.58,434934.1629,,,
2001,4,309,5,0,1,0,0,0,0,0,,6/30/200,JDOHERTY,GLBA,H,1221.35242,0.488540968,0,6486960.273,433875.2105,6487573.58,434934.1629,,,
2001,5,309,5,0,1,0,0,0,0,0,,7/1/01,JDOHERTY,GLBA,H,1221.35242,0.488540968,0,6486960.273,433875.2105,6487573.58,434934.1629,,,
2001,1,309,17,0,1,0,0,0,0,0,,6/5/01,JDOHERTY,GLBA,H,887.16798,0.354867192,0,6496798.277,434932.6708,6497249.639,435695.6365,,,
2001,2,309,15,0,1,0,0,0,2,0,,6/7/01,JDOHERTY,GLBA,H,887.16798,0.354867192,0,6496798.277,434932.6708,6497249.639,435695.6365,,,
2001,1,310,17,0,1,0,0,0,0,0,,6/5/01,JDOHERTY,GLBA,H,2279.43303,0.911773212,0,6488977.941,430968.4318,6490112.987,432938.7934,,,
2001,2,310,15,0,1,0,0,0,0,0,,6/7/01,JDOHERTY,GLBA,H,2279.43303,0.911773212,0,6488977.941,430968.4318,6490112.987,432938.7934,,,
2001,3,310,5,1,1,1,0,1,0,0,59,6/9/01,JDOHERTY,GLBA,H,9490.79154,3.796316616,0,6485998.843,441823.4026,6490747.821,450042.1997,442800.0576,6486530.531,20011059
2001,4,310,5,0,1,0,0,0,2,0,,6/30/200,JDOHERTY,GLBA,H,9490.79154,3.796316616,0,6485998.843,441823.4026,6490747.821,450042.1997,,,
2001,5,310,5,1,1,1,0,1,4,0,101,7/1/01,JDOHERTY,GLBA,H,9490.79154,3.796316616,0,6485998.843,441823.4026,6490747.821,450042.1997,442664.7844,6486477.078,20011101
2001,3,311,5,0,1,0,0,0,0,0,,6/9/01,JDOHERTY,GLBA,H,11241.0369,4.49641476,0,6482581.923,440713.0509,6488200.071,450446.4131,,,
2001,4,311,5,0,1,0,0,0,2,0,,6/30/200,JDOHERTY,GLBA,H,11241.0369,4.49641476,0,6482581.923,440713.0509,6488200.071,450446.4131,,,
2001,5,311,5,1,1,1,0,1,4,0,102,7/1/01,JDOHERTY,GLBA,H,11241.0369,4.49641476,0,6482581.923,440713.0509,6488200.071,450446.4131,445324.9717,6485236.252,20011102
2001,1,311,17,0,1,0,0,0,0,0,,6/5/01,JDOHERTY,GLBA,H,2455.90893,0.982363572,0,6488039.071,448541.8646,6489273.752,450663.7908,,,
2001,2,311,15,0,1,0,0,0,0,0,,6/7/01,JDOHERTY,GLBA,H,2455.90893,0.982363572,0,6488039.071,448541.8646,6489273.752,450663.7908,,,
2001,3,312,5,1,1,9,7,16,0,0,49,6/9/01,JDOHERTY,GLBA,H,1822.30735,0.72892294,0,6482456.886,435694.8788,6483377.852,437274.8059,436546.9717,6482961.882,20011049
2001,4,312,5,3,1,1,1,2,0,0,70,6/30/200,JDOHERTY,GLBA,H,1822.30735,0.72892294,0,6482456.886,435694.8788,6483377.852,437274.8059,436745.315,6483023.365,20013070
2001,4,312,5,1,1,1,0,1,0,0,,6/30/200,JDOHERTY,GLBA,H,1822.30735,0.72892294,0,6482456.886,435694.8788,6483377.852,437274.8059,436062.6044,6482560.738,
2001,4,312,5,2,1,1,0,1,0,0,,6/30/200,JDOHERTY,GLBA,H,1822.30735,0.72892294,0,6482456.886,435694.8788,6483377.852,437274.8059,436156.9264,6482708.958,
2001,4,312,5,4,1,18,5,23,0,0,,6/30/200,JDOHERTY,GLBA,H,1822.30735,0.72892294,1,6482456.886,435694.8788,6483377.852,437274.8059,436316.3582,6482926.23,
2001,5,312,5,1,1,1,0,1,0,0,92,7/1/01,JDOHERTY,GLBA,H,1822.30735,0.72892294,0,6482456.886,435694.8788,6483377.852,437274.8059,437308.7024,6482924.21,20011092
2001,5,312,5,2,1,1,1,2,0,0,,7/1/01,JDOHERTY,GLBA,H,1822.30735,0.72892294,0,6482456.886,435694.8788,6483377.852,437274.8059,437058.7527,6482870.649,
2001,5,312,5,3,1,1,1,2,0,0,,7/1/01,JDOHERTY,GLBA,H,1822.30735,0.72892294,0,6482456.886,435694.8788,6483377.852,437274.8059,436880.2165,6482772.454,
2001,5,312,5,4,1,1,0,1,0,0,,7/1/01,JDOHERTY,GLBA,H,1822.30735,0.72892294,0,6482456.886,435694.8788,6483377.852,437274.8059,436790.9484,6482531.431,
2001,5,312,5,5,1,1,1,2,0,0,,7/1/01,JDOHERTY,GLBA,H,1822.30735,0.72892294,0,6482456.886,435694.8788,6483377.852,437274.8059,436701.6803,6482674.26,
2001,5,312,5,6,1,1,0,1,0,0,,7/1/01,JDOHERTY,GLBA,H,1822.30735,0.72892294,0,6482456.886,435694.8788,6483377.852,437274.8059,436621.3391,6482442.163,
2001,5,312,5,7,1,1,0,1,0,0,,7/1/01,JDOHERTY,GLBA,H,1822.30735,0.72892294,0,6482456.886,435694.8788,6483377.852,437274.8059,436558.8512,6482593.918,
2001,1,312,17,0,1,0,0,0,0,0,,6/5/01,JDOHERTY,GLBA,H,642.00973,0.256803892,0,6487447.351,428348.8563,6487663.628,428702.3604,,,
2001,2,312,15,0,1,0,0,0,0,0,,6/7/01,JDOHERTY,GLBA,H,642.00973,0.256803892,0,6487447.351,428348.8563,6487663.628,428702.3604,,,
2001,3,313,5,1,1,1,1,2,3,3,45,6/9/01,JDOHERTY,GLBA,H,3868.44144,1.547376576,0,6469098.273,436548.8652,6471031.503,439904.6929,438366.2838,6469679.64,20011045
2001,4,313,5,1,1,1,0,1,0,0,,6/30/200,JDOHERTY,GLBA,H,3868.44144,1.547376576,0,6469098.273,436548.8652,6471031.503,439904.6929,437520.1049,6469180.43,
2001,5,313,5,0,1,0,0,0,0,0,,7/1/01,JDOHERTY,GLBA,H,3868.44144,1.547376576,0,6469098.273,436548.8652,6471031.503,439904.6929,,,
2001,1,313,17,1,1,1,0,1,0,0,15,6/5/01,JDOHERTY,GLBA,H,5607.68261,2.243073044,0,6487162.103,442229.0709,6489970.158,447082.8628,443451.7301,6487841.022,20011015
2001,2,313,15,1,1,1,0,1,0,0,25,6/7/01,JDOHERTY,GLBA,H,5607.68261,2.243073044,0,6487162.103,442229.0709,6489970.158,447082.8628,442693.9874,6486957.367,20011025
2001,4,314,5,1,1,1,0,1,0,0,61,6/30/200,JDOHERTY,GLBA,H,6115.89925,2.4463597,0,6468940.525,445871.8061,6472007.697,451167.3277,450024.4571,6470877.45,20011061
2001,4,314,5,7,1,1,0,1,0,0,62,6/30/200,JDOHERTY,GLBA,H,6115.89925,2.4463597,0,6468940.525,445871.8061,6472007.697,451167.3277,446611.5325,6469035.11,20017062
2001,4,314,5,8,1,1,0,1,0,0,62,6/30/200,JDOHERTY,GLBA,H,6115.89925,2.4463597,0,6468940.525,445871.8061,6472007.697,451167.3277,446679.4713,6468919.215,20018062
2001,4,314,5,2,1,1,0,1,0,0,,6/30/200,JDOHERTY,GLBA,H,6115.89925,2.4463597,0,6468940.525,445871.8061,6472007.697,451167.3277,449632.8104,6470713.598,
2001,4,314,5,3,1,1,0,1,0,0,,6/30/200,JDOHERTY,GLBA,H,6115.89925,2.4463597,0,6468940.525,445871.8061,6472007.697,451167.3277,449413.0083,6470517.774,
2001,4,314,5,4,1,1,0,1,0,0,,6/30/200,JDOHERTY,GLBA,H,6115.89925,2.4463597,0,6468940.525,445871.8061,6472007.697,451167.3277,449089.3002,6470262.005,
2001,4,314,5,5,1,1,0,1,0,0,,6/30/200,JDOHERTY,GLBA,H,6115.89925,2.4463597,0,6468940.525,445871.8061,6472007.697,451167.3277,448653.6924,6470158.098,
2001,4,314,5,6,1,1,0,1,0,0,,6/30/200,JDOHERTY,GLBA,H,6115.89925,2.4463597,0,6468940.525,445871.8061,6472007.697,451167.3277,448294.0165,6469890.339,
2001,5,314,5,1,1,1,0,1,0,0,84,7/1/01,JDOHERTY,GLBA,H,6115.89925,2.4463597,0,6468940.525,445871.8061,6472007.697,451167.3277,449779.1755,6470749.223,20011084
2001,5,314,5,2,1,1,0,1,0,0,,7/1/01,JDOHERTY,GLBA,H,6115.89925,2.4463597,0,6468940.525,445871.8061,6472007.697,451167.3277,449078.1003,6470318.497,
2001,5,314,5,3,1,1,0,1,0,0,,7/1/01,JDOHERTY,GLBA,H,6115.89925,2.4463597,0,6468940.525,445871.8061,6472007.697,451167.3277,448725.2711,6470126.045,
2001,5,314,5,4,1,1,0,1,0,0,,7/1/01,JDOHERTY,GLBA,H,6115.89925,2.4463597,0,6468940.525,445871.8061,6472007.697,451167.3277,448335.7847,6469901.518,
2001,5,314,5,5,1,1,0,1,0,0,,7/1/01,JDOHERTY,GLBA,H,6115.89925,2.4463597,0,6468940.525,445871.8061,6472007.697,451167.3277,448037.9423,6469731.976,
2001,5,314,5,6,1,1,0,1,0,0,,7/1/01,JDOHERTY,GLBA,H,6115.89925,2.4463597,0,6468940.525,445871.8061,6472007.697,451167.3277,447671.3668,6469512.031,
2001,5,314,5,7,1,1,0,1,0,0,,7/1/01,JDOHERTY,GLBA,H,6115.89925,2.4463597,0,6468940.525,445871.8061,6472007.697,451167.3277,447199.401,6469191.278,
2001,1,314,17,0,1,0,0,0,0,0,,6/5/01,JDOHERTY,GLBA,H,4240.09958,1.696039832,0,6486122.15,430820.8929,6488230.635,434488.8391,,,
2001,2,314,15,0,1,0,0,0,0,0,,6/7/01,JDOHERTY,GLBA,H,4240.09958,1.696039832,0,6486122.15,430820.8929,6488230.635,434488.8391,,,
2001,4,315,5,1,1,2,0,2,4,0,82,6/30/200,JDOHERTY,GLBA,H,980.25976,0.392103904,0,6466242.339,441188.4083,6466730.897,442035.068,441380.2463,6466333.544,20011082
2001,5,315,5,0,1,0,0,0,0,0,,7/1/01,JDOHERTY,GLBA,H,980.25976,0.392103904,0,6466242.339,441188.4083,6466730.897,442035.068,,,
2001,1,315,17,0,1,0,0,0,0,0,,6/5/01,JDOHERTY,GLBA,H,1763.57855,0.70543142,0,6482771.367,444244.3893,6483659.326,445773.0148,,,
2001,2,315,15,0,1,0,0,0,0,0,,6/7/01,JDOHERTY,GLBA,H,1763.57855,0.70543142,0,6482771.367,444244.3893,6483659.326,445773.0148,,,
2001,3,329,5,0,1,0,0,0,0,0,,6/9/01,JDOHERTY,GLBA,L,2054.84776,0.821939104,0,6511161.834,438511.5232,6512191.964,440293.3509,,,
2001,4,329,5,0,1,0,0,0,0,0,,6/30/200,JDOHERTY,GLBA,L,2054.84776,0.821939104,0,6511161.834,438511.5232,6512191.964,440293.3509,,,
2001,5,329,5,0,1,0,0,0,0,0,,7/1/01,JDOHERTY,GLBA,L,2054.84776,0.821939104,0,6511161.834,438511.5232,6512191.964,440293.3509,,,
2001,2,333,15,0,1,0,0,0,0,0,,6/7/01,JDOHERTY,GLBA,L,1035.41013,0.414164052,0,6510667.518,439256.4976,6511191.856,440152.5064,,,
2001,3,334,5,0,1,0,0,0,0,0,,6/9/01,JDOHERTY,GLBA,L,1674.46273,0.669785092,0,6510114.906,436670.5376,6510945.295,438122.062,,,
2001,4,334,5,0,1,0,0,0,0,0,,6/30/200,JDOHERTY,GLBA,L,1674.46273,0.669785092,0,6510114.906,436670.5376,6510945.295,438122.062,,,
2001,5,334,5,0,1,0,0,0,4,0,,7/1/01,JDOHERTY,GLBA,L,1674.46273,0.669785092,0,6510114.906,436670.5376,6510945.295,438122.062,,,
2001,1,335,17,0,1,0,0,0,0,0,,6/5/01,JDOHERTY,GLBA,L,4544.48578,1.817794312,0,6510114.906,436670.5376,6512372.787,440604.8391,,,
2001,2,336,15,0,1,0,0,0,4,0,,6/7/01,JDOHERTY,GLBA,L,1553.18759,0.621275036,0,6509204.714,436713.6185,6509981.144,438058.4209,,,
2001,3,337,5,0,1,0,0,0,0,0,,6/9/01,JDOHERTY,GLBA,L,1822.61407,0.729045628,0,6508148.564,433277.4649,6509049.807,434857.1988,,,
2001,4,337,5,0,1,0,0,0,4,0,,6/30/200,JDOHERTY,GLBA,L,1822.61407,0.729045628,0,6508148.564,433277.4649,6509049.807,434857.1988,,,
2001,5,337,5,0,1,0,0,0,0,0,,7/1/01,JDOHERTY,GLBA,L,1822.61407,0.729045628,0,6508148.564,433277.4649,6509049.807,434857.1988,,,
2001,3,338,5,0,1,0,0,0,0,0,,6/9/01,JDOHERTY,GLBA,L,869.57657,0.347830628,0,6507836.368,437541.2715,6508269.83,438291.8637,,,
2001,4,338,5,0,1,0,0,0,4,0,,6/30/200,JDOHERTY,GLBA,L,869.57657,0.347830628,0,6507836.368,437541.2715,6508269.83,438291.8637,,,
2001,5,338,5,0,1,0,0,0,1,0,,7/1/01,JDOHERTY,GLBA,L,869.57657,0.347830628,0,6507836.368,437541.2715,6508269.83,438291.8637,,,
2001,1,338,17,0,1,0,0,0,0,0,,6/5/01,JDOHERTY,GLBA,L,1001.46915,0.40058766,0,6507836.368,437541.2715,6508342.215,438408.9004,,,
2001,3,339,5,0,1,0,0,0,0,0,,6/9/01,JDOHERTY,GLBA,L,886.20896,0.354483584,0,6507193.483,431628.4095,6507644.196,432389.7877,,,
2001,4,339,5,0,1,0,0,0,4,0,,6/30/200,JDOHERTY,GLBA,L,886.20896,0.354483584,0,6507193.483,431628.4095,6507644.196,432389.7877,,,
2001,5,339,5,0,1,0,0,0,4,0,,7/1/01,JDOHERTY,GLBA,L,886.20896,0.354483584,0,6507193.483,431628.4095,6507644.196,432389.7877,,,
2001,2,339,15,0,1,0,0,0,2,0,,6/7/01,JDOHERTY,GLBA,L,2783.68317,1.113473268,0,6507377.911,438354.9703,6508769.476,440771.7498,,,
2001,1,339,17,0,1,0,0,0,0,0,,6/5/01,JDOHERTY,GLBA,L,3727.38799,1.490955196,0,6507193.483,431628.4095,6509049.807,434857.1988,,,
2001,2,340,15,0,1,0,0,0,4,0,,6/7/01,JDOHERTY,GLBA,L,1383.49718,0.553398872,0,6507310.734,433427.2975,6507995.687,434627.0293,,,
2001,1,341,17,0,1,0,0,0,0,0,,6/5/01,JDOHERTY,GLBA,L,2336.36746,0.934546984,0,6505743.47,433902.9784,6506897.561,435922.4576,,,
2001,3,341,5,0,1,0,0,0,0,0,,6/9/01,JDOHERTY,GLBA,L,2336.36746,0.934546984,0,6505743.47,433902.9784,6506897.561,435922.4576,,,
2001,4,341,5,0,1,0,0,0,4,0,,6/30/200,JDOHERTY,GLBA,L,2336.36746,0.934546984,0,6505743.47,433902.9784,6506897.561,435922.4576,,,
2001,5,341,5,0,1,0,0,0,4,0,,7/2/01,JDOHERTY,GLBA,L,2336.36746,0.934546984,0,6505743.47,433902.9784,6506897.561,435922.4576,,,
2001,2,341,15,0,1,0,0,0,4,0,,6/7/01,JDOHERTY,GLBA,L,687.35333,0.274941332,0,6506643.697,432285.4174,6506986.034,432880.7123,,,
2001,3,342,5,0,1,0,0,0,0,0,,6/9/01,JDOHERTY,GLBA,L,1449.21516,0.579686064,0,6505555.398,428787.0848,6506274.992,430046.8255,,,
2001,4,342,5,0,1,0,0,0,2,0,,6/30/200,JDOHERTY,GLBA,L,1449.21516,0.579686064,0,6505555.398,428787.0848,6506274.992,430046.8255,,,
2001,5,342,5,0,1,0,0,0,4,0,,7/1/01,JDOHERTY,GLBA,L,1449.21516,0.579686064,0,6505555.398,428787.0848,6506274.992,430046.8255,,,
2001,2,343,15,0,1,0,0,0,4,0,,6/7/01,JDOHERTY,GLBA,L,1486.41595,0.59456638,0,6505248.115,434658.1145,6505987.841,435936.4463,,,
2001,1,343,17,1,1,1,0,1,0,0,5,6/5/01,JDOHERTY,GLBA,L,6848.50533,2.739402132,0,6504168.247,435974.1339,6507583.078,441903.0555,437256.6596,6504906.613,20011005
2001,2,344,15,0,1,0,0,0,2,0,,6/7/01,JDOHERTY,GLBA,L,1579.79156,0.631916624,0,6504915.163,429287.6904,6505707.244,430655.1384,,,
2001,1,344,17,0,1,0,0,0,0,0,,6/5/01,JDOHERTY,GLBA,L,5348.45161,2.139380644,0,6503613.911,425415.3358,6506274.992,430046.8255,,,
2001,3,344,5,1,1,1,0,1,0,0,54,6/9/01,JDOHERTY,GLBA,L,4262.04036,1.704816144,0,6505323.721,437974.4488,6507456.657,441669.3464,439918.2451,6506430.627,20011054
2001,4,344,5,0,1,0,0,0,2,0,,6/30/200,JDOHERTY,GLBA,L,4262.04036,1.704816144,0,6505323.721,437974.4488,6507456.657,441669.3464,,,
2001,5,344,5,0,1,0,0,0,4,0,,7/1/01,JDOHERTY,GLBA,L,4262.04036,1.704816144,0,6505323.721,437974.4488,6507456.657,441669.3464,,,
2001,1,345,17,0,1,0,0,0,0,0,,6/5/01,JDOHERTY,GLBA,L,1682.53501,0.673014004,0,6503473.443,429977.0676,6504301.345,431432.5035,,,
2001,3,345,5,0,1,0,0,0,0,0,,6/9/01,JDOHERTY,GLBA,L,1675.15678,0.670062712,0,6504168.247,435974.1339,6504998.538,437418.3227,,,
2001,4,345,5,0,1,0,0,0,4,0,,6/30/200,JDOHERTY,GLBA,L,1675.15678,0.670062712,0,6504168.247,435974.1339,6504998.538,437418.3227,,,
2001,5,345,5,0,1,0,0,0,3,0,,7/2/01,JDOHERTY,GLBA,L,1675.15678,0.670062712,0,6504168.247,435974.1339,6504998.538,437418.3227,,,
2001,2,345,15,0,1,0,0,0,4,0,,6/7/01,JDOHERTY,GLBA,L,3541.68815,1.41667526,0,6504666.275,438466.6108,6506437.952,441528.4506,,,
2001,3,346,5,0,1,0,0,0,0,0,,6/9/01,JDOHERTY,GLBA,L,1823.8811,0.72955244,0,6503685.355,425561.7572,6504602.213,427135.8073,,,
2001,4,346,5,0,1,0,0,0,0,0,,6/30/200,JDOHERTY,GLBA,L,1823.8811,0.72955244,0,6503685.355,425561.7572,6504602.213,427135.8073,,,
2001,5,346,5,0,1,0,0,0,4,0,,7/1/01,JDOHERTY,GLBA,L,1823.8811,0.72955244,0,6503685.355,425561.7572,6504602.213,427135.8073,,,
2001,1,346,17,0,1,0,0,0,0,0,,6/5/01,JDOHERTY,GLBA,L,6657.19684,2.662878736,0,6502088.058,437197.3742,6505414.384,442962.6719,,,
2001,1,347,17,0,1,0,0,0,0,0,,6/5/01,JDOHERTY,GLBA,L,1768.35539,0.707342156,0,6500869.417,430278.5617,6501751.916,431803.5554,,,
2001,3,347,5,0,1,0,0,0,0,0,,6/9/01,JDOHERTY,GLBA,L,1762.31341,0.704925364,0,6503418.995,429908.396,6504301.345,431432.5035,,,
2001,4,347,5,0,1,0,0,0,4,0,,6/30/200,JDOHERTY,GLBA,L,1762.31341,0.704925364,0,6503418.995,429908.396,6504301.345,431432.5035,,,
2001,5,347,5,1,1,1,0,1,0,0,103,7/2/01,JDOHERTY,GLBA,L,1762.31341,0.704925364,0,6503418.995,429908.396,6504301.345,431432.5035,,,20011103
2001,2,347,15,0,1,0,0,0,4,0,,6/7/01,JDOHERTY,GLBA,L,1556.74665,0.62269866,0,6503835.155,441818.0105,6504613.351,443163.5731,,,
2001,1,348,17,0,1,0,0,0,0,0,,6/5/01,JDOHERTY,GLBA,L,2084.78595,0.83391438,0,6499992.153,443144.4356,6501024.142,444949.3534,,,
2001,2,348,15,0,1,0,0,0,4,0,,6/7/01,JDOHERTY,GLBA,L,1603.27403,0.641309612,0,6503384.612,436222.3178,6504178.813,437608.1503,,,
2001,3,348,5,0,1,0,0,0,0,0,,6/9/01,JDOHERTY,GLBA,L,4088.8652,1.63554608,0,6503244.162,439198.3568,6505287.756,442738.5326,,,
2001,4,348,5,0,1,0,0,0,0,0,,6/30/200,JDOHERTY,GLBA,L,4088.8652,1.63554608,0,6503244.162,439198.3568,6505287.756,442738.5326,,,
2001,5,348,5,0,1,0,0,0,0,0,,7/2/01,JDOHERTY,GLBA,L,4088.8652,1.63554608,0,6503244.162,439198.3568,6505287.756,442738.5326,,,
2001,1,349,17,0,1,0,0,0,0,0,,6/5/01,JDOHERTY,GLBA,L,1573.52166,0.629408664,0,6499557.613,437582.4316,6500334.049,438949.6678,,,
2001,3,349,5,0,1,0,0,0,0,0,,6/9/01,JDOHERTY,GLBA,L,1573.52166,0.629408664,0,6499557.613,437582.4316,6500334.049,438949.6678,,,
2001,4,349,5,0,1,0,0,0,2,0,,6/30/200,JDOHERTY,GLBA,L,1573.52166,0.629408664,0,6499557.613,437582.4316,6500334.049,438949.6678,,,
2001,5,349,5,0,1,0,0,0,0,0,,7/2/01,JDOHERTY,GLBA,L,1573.52166,0.629408664,0,6499557.613,437582.4316,6500334.049,438949.6678,,,
2001,3,349,5,0,1,0,0,0,0,0,,6/9/01,JDOHERTY,GLBA,L,1494.44295,0.59777718,0,6502088.058,437197.3742,6502847.022,438486.1812,,,
2001,4,349,5,0,1,0,0,0,4,0,,6/30/200,JDOHERTY,GLBA,L,1494.44295,0.59777718,0,6502088.058,437197.3742,6502847.022,438486.1812,,,
2001,5,349,5,0,1,0,0,0,4,0,,7/2/01,JDOHERTY,GLBA,L,1494.44295,0.59777718,0,6502088.058,437197.3742,6502847.022,438486.1812,,,
2001,2,349,15,0,1,0,0,0,0,0,,6/7/01,JDOHERTY,GLBA,L,1349.36441,0.539745764,0,6503027.067,426013.4034,6503710.466,427177.119,,,
2001,1,350,17,0,1,0,0,0,0,0,,6/5/01,JDOHERTY,GLBA,L,1590.47269,0.636189076,0,6499130.503,432048.0593,6499923.393,433426.5805,,,
2001,3,350,5,0,1,0,0,0,0,0,,6/9/01,JDOHERTY,GLBA,L,298.36176,0.119344704,0,6501607.883,431549.4927,6501751.916,431803.5554,,,
2001,4,350,5,0,1,0,0,0,4,0,,6/30/200,JDOHERTY,GLBA,L,298.36176,0.119344704,0,6501607.883,431549.4927,6501751.916,431803.5554,,,
2001,5,350,5,0,1,0,0,0,0,0,,7/2/01,JDOHERTY,GLBA,L,298.36176,0.119344704,0,6501607.883,431549.4927,6501751.916,431803.5554,,,
2001,2,350,15,0,1,0,0,0,2,0,,6/7/01,JDOHERTY,GLBA,L,1941.12205,0.77644882,0,6502473.359,429852.6694,6503445.741,431533.4607,,,
2001,1,351,17,1,1,1,0,1,0,0,7,6/5/01,JDOHERTY,GLBA,L,2762.52046,1.105008184,0,6498345.673,440303.0185,6499720.334,442695.2697,442309.5301,6499434.807,20011007
2001,3,351,5,0,1,0,0,0,0,0,,6/9/01,JDOHERTY,GLBA,L,169.60083,0.067840332,0,6501256.007,440541.0947,6501346.574,440687.5936,,,
2001,4,351,5,0,1,0,0,0,0,0,,6/30/200,JDOHERTY,GLBA,L,169.60083,0.067840332,0,6501256.007,440541.0947,6501346.574,440687.5936,,,
2001,5,351,5,0,1,0,0,0,3,0,,7/1/01,JDOHERTY,GLBA,L,169.60083,0.067840332,0,6501256.007,440541.0947,6501346.574,440687.5936,,,
2001,2,351,15,0,1,0,0,0,2,0,,6/7/01,JDOHERTY,GLBA,L,4801.45701,1.920582804,0,6501088.07,437055.4603,6503491.599,441213.3956,,,
2001,2,352,15,0,1,0,0,0,3,0,,6/7/01,JDOHERTY,GLBA,L,1723.3665,0.6893466,0,6500319.584,430926.8157,6501184.452,432412.8535,,,
2001,3,352,5,0,1,0,0,0,0,0,,6/9/01,JDOHERTY,GLBA,L,742.62289,0.297049156,0,6500941.563,430395.9702,6501319.87,431041.31,,,
2001,4,352,5,0,1,0,0,0,4,0,,6/30/200,JDOHERTY,GLBA,L,742.62289,0.297049156,0,6500941.563,430395.9702,6501319.87,431041.31,,,
2001,5,352,5,0,1,0,0,0,0,0,,7/2/01,JDOHERTY,GLBA,L,742.62289,0.297049156,0,6500941.563,430395.9702,6501319.87,431041.31,,,
2001,1,353,17,0,1,0,0,0,0,0,,6/5/01,JDOHERTY,GLBA,L,431.7072,0.17268288,0,6497446.102,433936.2763,6497662.553,434307.9421,,,
2001,3,353,5,0,1,0,0,0,0,0,,6/9/01,JDOHERTY,GLBA,L,903.25392,0.361301568,0,6500317.734,443729.7895,6500770.534,444510.3722,,,
2001,4,353,5,0,1,0,0,0,0,0,,6/30/200,JDOHERTY,GLBA,L,903.25392,0.361301568,0,6500317.734,443729.7895,6500770.534,444510.3722,,,
2001,5,353,5,0,1,0,0,0,4,0,,7/2/01,JDOHERTY,GLBA,L,903.25392,0.361301568,0,6500317.734,443729.7895,6500770.534,444510.3722,,,
2001,2,353,15,0,1,0,0,0,4,0,,6/7/01,JDOHERTY,GLBA,L,3917.92137,1.567168548,0,6498918.53,438085.2679,6500870.67,441473.7369,,,
2001,1,354,17,0,1,0,0,0,3,0,,6/5/01,JDOHERTY,GLBA,L,3314.76437,1.325905748,0,6497226.306,443171.8596,6498893.027,446042.1128,,,
2001,2,354,15,0,1,0,0,0,4,0,,6/7/01,JDOHERTY,GLBA,L,2623.43669,1.049374676,0,6498094.094,431875.0531,6499409.89,434153.4728,,,
2001,1,355,17,0,1,0,0,0,0,0,,6/5/01,JDOHERTY,GLBA,L,1681.92939,0.672771756,0,6495943.102,436139.125,6496791.864,437596.2408,,,
2001,3,355,5,0,1,0,0,0,0,0,,6/9/01,JDOHERTY,GLBA,L,1572.86172,0.629144688,0,6499130.334,432057.7372,6499923.393,433426.5805,,,
2001,4,355,5,0,1,0,0,0,4,0,,6/30/200,JDOHERTY,GLBA,L,1572.86172,0.629144688,0,6499130.334,432057.7372,6499923.393,433426.5805,,,
2001,5,355,5,0,1,0,0,0,0,0,,7/2/01,JDOHERTY,GLBA,L,1572.86172,0.629144688,0,6499130.334,432057.7372,6499923.393,433426.5805,,,
2001,2,355,15,1,1,1,0,1,2,0,32,6/7/01,JDOHERTY,GLBA,L,5584.49625,2.2337985,0,6497797.817,440933.7181,6500585.676,445775.2786,442254.0986,6498092.613,20011032
2001,1,356,17,0,1,0,0,0,0,0,,6/5/01,JDOHERTY,GLBA,L,443.93223,0.177572892,0,6495797.155,440680.5787,6496014.1,441061.6941,,,
2001,3,356,5,0,1,0,0,0,0,0,,6/9/01,JDOHERTY,GLBA,L,443.93223,0.177572892,0,6495797.155,440680.5787,6496014.1,441061.6941,,,
2001,4,356,5,0,1,0,0,0,4,0,,6/30/200,JDOHERTY,GLBA,L,443.93223,0.177572892,0,6495797.155,440680.5787,6496014.1,441061.6941,,,
2001,5,356,5,0,1,0,0,0,4,4,,7/1/01,JDOHERTY,GLBA,L,443.93223,0.177572892,0,6495797.155,440680.5787,6496014.1,441061.6941,,,
2001,2,356,15,0,1,0,0,0,4,0,,6/7/01,JDOHERTY,GLBA,L,1581.80856,0.632723424,0,6497455.831,435573.1384,6498250.122,436941.8116,,,
2001,3,356,5,0,1,0,0,0,0,0,,6/9/01,JDOHERTY,GLBA,L,2623.24428,1.049297712,0,6498345.673,440303.0185,6499666.375,442578.3354,,,
2001,4,356,5,0,1,0,0,0,2,0,,6/30/200,JDOHERTY,GLBA,L,2623.24428,1.049297712,0,6498345.673,440303.0185,6499666.375,442578.3354,,,
2001,5,356,5,0,1,0,0,0,3,0,,7/1/01,JDOHERTY,GLBA,L,2623.24428,1.049297712,0,6498345.673,440303.0185,6499666.375,442578.3354,,,
2001,1,357,17,0,1,0,0,0,4,0,,6/5/01,JDOHERTY,GLBA,L,2149.17984,0.859671936,0,6495638.077,445212.3093,6496707.349,447077.2445,,,
2001,2,357,15,0,1,0,0,0,0,0,,6/7/01,JDOHERTY,GLBA,L,3054.67596,1.221870384,0,6496751.33,443930.0945,6498273.203,446575.6962,,,
2001,3,357,5,0,1,0,0,0,0,0,,6/9/01,JDOHERTY,GLBA,L,1511.27179,0.604508716,0,6498023.114,434943.426,6498781.022,436253.36,,,
2001,4,357,5,0,1,0,0,0,4,0,,6/30/200,JDOHERTY,GLBA,L,1511.27179,0.604508716,0,6498023.114,434943.426,6498781.022,436253.36,,,
2001,5,357,5,0,1,0,0,0,4,0,,7/1/01,JDOHERTY,GLBA,L,1511.27179,0.604508716,0,6498023.114,434943.426,6498781.022,436253.36,,,
2001,1,358,17,0,1,0,0,0,0,0,,6/5/01,JDOHERTY,GLBA,L,2394.40214,0.957760856,0,6493664.817,436993.6624,6494856.881,439067.3379,,,
2001,2,358,15,0,1,0,0,0,4,0,,6/7/01,JDOHERTY,GLBA,L,1596.76598,0.638706392,0,6495231.66,436515.0762,6496026.13,437893.9987,,,
2001,3,358,5,0,1,0,0,0,0,0,,6/9/01,JDOHERTY,GLBA,L,3015.14629,1.206058516,0,6497407.644,443465.0205,6498911.181,446071.404,,,
2001,4,358,5,0,1,0,0,0,2,0,,6/30/200,JDOHERTY,GLBA,L,3015.14629,1.206058516,0,6497407.644,443465.0205,6498911.181,446071.404,,,
2001,5,358,5,0,1,0,0,0,4,0,,7/1/01,JDOHERTY,GLBA,L,3015.14629,1.206058516,0,6497407.644,443465.0205,6498911.181,446071.404,,,
2001,1,359,17,0,1,0,0,0,0,0,,6/5/01,JDOHERTY,GLBA,L,9259.82211,3.703928844,0,6489220.921,434097.813,6493863.924,442114.8106,,,
2001,2,359,15,1,1,1,0,1,4,0,35,6/7/01,JDOHERTY,GLBA,L,5018.77782,2.007511128,0,6492827.311,437135.2801,6495339.525,441487.5174,437840.218,6493196.819,20011035
2001,3,359,5,0,1,0,0,0,0,0,,6/9/01,JDOHERTY,GLBA,L,1701.92981,0.680771924,0,6495943.261,436129.4391,6496791.864,437596.2408,,,
2001,4,359,5,0,1,0,0,0,4,0,,6/30/200,JDOHERTY,GLBA,L,1701.92981,0.680771924,0,6495943.261,436129.4391,6496791.864,437596.2408,,,
2001,5,359,5,0,1,0,0,0,0,0,,7/2/01,JDOHERTY,GLBA,L,1701.92981,0.680771924,0,6495943.261,436129.4391,6496791.864,437596.2408,,,
2001,1,360,17,0,1,0,0,0,0,0,,6/5/01,JDOHERTY,GLBA,L,5968.38495,2.38735398,0,6487068.877,435149.1074,6490048.979,440321.525,,,
2001,2,360,15,0,1,0,0,0,0,0,,6/7/01,JDOHERTY,GLBA,L,1456.4696,0.58258784,0,6492356.98,441113.1084,6493080.56,442374.6482,,,
2001,1,361,17,0,1,0,0,0,0,0,,6/5/01,JDOHERTY,GLBA,L,4233.8038,1.69352152,0,6485096.845,436563.9846,6487210.694,440229.6491,,,
2001,2,361,15,0,1,0,0,0,3,0,,6/7/01,JDOHERTY,GLBA,L,6567.99429,2.627197716,0,6488455.415,434366.4133,6491742.008,440056.4278,,,
2001,3,361,5,0,1,0,0,0,0,0,,6/9/01,JDOHERTY,GLBA,L,2214.21789,0.885687156,0,6493755.096,437150.2166,6494856.881,439067.3379,,,
2001,4,361,5,0,1,0,0,0,4,0,,6/30/200,JDOHERTY,GLBA,L,2214.21789,0.885687156,0,6493755.096,437150.2166,6494856.881,439067.3379,,,
2001,5,361,5,0,1,0,0,0,4,0,,7/2/01,JDOHERTY,GLBA,L,2214.21789,0.885687156,0,6493755.096,437150.2166,6494856.881,439067.3379,,,
2001,1,362,17,0,1,0,0,0,0,0,,6/5/01,JDOHERTY,GLBA,L,2987.84447,1.195137788,0,6482891.065,437539.1857,6484391.126,440128.2845,,,
2001,2,362,15,1,1,1,0,1,4,0,36,6/7/01,JDOHERTY,GLBA,L,6258.16345,2.50326538,0,6486718.434,436143.5475,6489844.517,441570.078,440468.8314,6489144.373,20011036
2001,2,362,15,2,1,1,0,1,4,0,,6/7/01,JDOHERTY,GLBA,L,6258.16345,2.50326538,0,6486718.434,436143.5475,6489844.517,441570.078,441432.657,6489845.337,
2001,3,362,5,0,1,0,0,0,0,0,,6/9/01,JDOHERTY,GLBA,L,1646.03379,0.658413516,0,6493031.445,440696.6975,6493863.924,442114.8106,,,
2001,4,362,5,0,1,0,0,0,0,0,,6/30/200,JDOHERTY,GLBA,L,1646.03379,0.658413516,0,6493031.445,440696.6975,6493863.924,442114.8106,,,
2001,5,362,5,1,1,1,0,1,4,0,95,7/1/01,JDOHERTY,GLBA,L,1646.03379,0.658413516,0,6493031.445,440696.6975,6493863.924,442114.8106,,,
2001,1,363,17,0,1,0,0,0,0,0,,6/5/01,JDOHERTY,GLBA,L,552.37306,0.220949224,0,6481842.793,440497.6916,6482113.926,440978.1898,,,
2001,2,363,15,0,1,0,0,0,3,0,,6/7/01,JDOHERTY,GLBA,L,3600.90445,1.44036178,0,6484115.297,436431.4733,6485903.383,439549.2116,,,
2001,3,363,5,0,1,0,0,0,0,0,,6/9/01,JDOHERTY,GLBA,L,7025.38515,2.81015406,0,6489167.055,433990.1477,6492669.649,440080.3583,,,
2001,4,363,5,1,1,1,0,1,2,0,73,6/30/200,JDOHERTY,GLBA,L,7025.38515,2.81015406,0,6489167.055,433990.1477,6492669.649,440080.3583,436567.0405,6490677.957,20011073
2001,4,363,5,2,1,1,0,1,2,0,73,6/30/200,JDOHERTY,GLBA,L,7025.38515,2.81015406,0,6489167.055,433990.1477,6492669.649,440080.3583,436799.5032,6490677.957,20012073
2001,5,363,5,0,1,0,0,0,0,0,,7/1/01,JDOHERTY,GLBA,L,7025.38515,2.81015406,0,6489167.055,433990.1477,6492669.649,440080.3583,,,
2001,1,364,17,0,1,0,0,0,0,0,,6/5/01,JDOHERTY,GLBA,L,1520.92397,0.608369588,0,6480685.691,438505.8034,6481444.809,439820.7085,,,
2001,2,364,15,0,1,0,0,0,0,0,,6/7/01,JDOHERTY,GLBA,L,2254.71101,0.901884404,0,6482017.719,437603.0472,6483137.85,439555.1081,,,
2001,3,364,5,1,1,1,0,1,0,0,51,6/9/01,JDOHERTY,GLBA,L,5376.59737,2.150638948,0,6487303.202,435570.5089,6489994.794,440223.6717,439689.9144,6489675.798,20011051
2001,4,364,5,1,1,1,0,1,2,0,72,6/30/200,JDOHERTY,GLBA,L,5376.59737,2.150638948,0,6487303.202,435570.5089,6489994.794,440223.6717,435679.7061,6487353.643,20011072
2001,5,364,5,0,1,0,0,0,0,0,,7/1/01,JDOHERTY,GLBA,L,5376.59737,2.150638948,0,6487303.202,435570.5089,6489994.794,440223.6717,,,
2001,1,365,17,0,1,0,0,0,0,0,,6/5/01,JDOHERTY,GLBA,L,4301.88683,1.720754732,0,6478010.362,438677.9727,6480162.457,442407.835,,,
2001,2,365,15,0,1,0,0,0,2,0,,6/7/01,JDOHERTY,GLBA,L,2558.52897,1.023411588,0,6479631.392,438275.246,6480914.867,440493.3328,,,
2001,3,365,5,0,1,0,0,0,0,0,,6/9/01,JDOHERTY,GLBA,L,385.3813,0.15415252,0,6487030.194,439896.7535,6487210.694,440229.6491,,,
2001,4,365,5,0,1,0,0,0,0,0,,6/30/200,JDOHERTY,GLBA,L,385.3813,0.15415252,0,6487030.194,439896.7535,6487210.694,440229.6491,,,
2001,5,365,5,0,1,0,0,0,2,0,,7/1/01,JDOHERTY,GLBA,L,385.3813,0.15415252,0,6487030.194,439896.7535,6487210.694,440229.6491,,,
2001,2,366,15,0,1,0,0,0,0,0,,6/7/01,JDOHERTY,GLBA,L,415.36022,0.166144088,0,6478570.347,446043.1565,6478769.528,446405.9013,,,
2001,1,366,17,1,1,1,1,2,0,0,1,6/5/01,JDOHERTY,GLBA,L,7001.81486,2.800725944,0,6475299.153,438771.9721,6478791.23,444839.6824,439395.9264,6475653.286,20011001
2001,3,366,5,1,1,2,0,2,0,0,50,6/9/01,JDOHERTY,GLBA,L,2968.27213,1.187308852,0,6485259.761,436819.2051,6486741.089,439387.3554,438517.0409,6486227.083,20011050
2001,4,366,5,0,1,0,0,0,0,0,,6/30/200,JDOHERTY,GLBA,L,2968.27213,1.187308852,0,6485259.761,436819.2051,6486741.089,439387.3554,,,
2001,5,366,5,0,1,0,0,0,0,0,,7/1/01,JDOHERTY,GLBA,L,2968.27213,1.187308852,0,6485259.761,436819.2051,6486741.089,439387.3554,,,
2001,1,367,17,0,1,0,0,0,0,0,,6/5/01,JDOHERTY,GLBA,L,7924.16718,3.169666872,0,6472750.271,439170.803,6476714.509,446037.1138,,,
2001,2,367,15,0,1,0,0,0,3,0,,6/7/01,JDOHERTY,GLBA,L,5338.29354,2.135317416,0,6476937.805,438427.5754,6479614.831,443051.5782,,,
2001,3,367,5,0,1,0,0,0,0,0,,6/9/01,JDOHERTY,GLBA,L,1917.63907,0.767055628,0,6482891.065,437539.1857,6483867.08,439206.797,,,
2001,4,367,5,1,1,1,1,2,0,0,71,6/30/200,JDOHERTY,GLBA,L,1917.63907,0.767055628,0,6482891.065,437539.1857,6483867.08,439206.797,438069.8217,6483197.785,20011071
2001,5,367,5,0,1,0,0,0,0,0,,7/1/01,JDOHERTY,GLBA,L,1917.63907,0.767055628,0,6482891.065,437539.1857,6483867.08,439206.797,,,
2001,1,368,17,0,1,0,0,0,0,0,,6/5/01,JDOHERTY,GLBA,L,6761.26623,2.704506492,0,6470671.834,440367.2239,6474057.981,446224.6718,,,
2001,2,368,15,0,1,0,0,0,3,0,,6/7/01,JDOHERTY,GLBA,L,7681.95718,3.072782872,0,6474461.588,438924.5214,6478298.459,445572.3249,,,
2001,3,368,5,0,1,0,0,0,0,0,,6/9/01,JDOHERTY,GLBA,L,1233.69907,0.493479628,0,6480866.531,438810.1258,6481481.025,439879.6068,,,
2001,4,368,5,0,1,0,0,0,0,0,,6/30/200,JDOHERTY,GLBA,L,1233.69907,0.493479628,0,6480866.531,438810.1258,6481481.025,439879.6068,,,
2001,5,368,5,0,1,0,0,0,0,0,,7/1/01,JDOHERTY,GLBA,L,1233.69907,0.493479628,0,6480866.531,438810.1258,6481481.025,439879.6068,,,
2001,1,369,17,1,1,1,0,1,0,0,18,6/5/01,JDOHERTY,GLBA,L,4792.89841,1.917159364,0,6468485.342,441368.216,6470875.542,445518.1754,444433.2081,6470334.367,20011018
2001,1,369,17,2,1,1,0,1,0,0,18,6/5/01,JDOHERTY,GLBA,L,4792.89841,1.917159364,0,6468485.342,441368.216,6470875.542,445518.1754,444401.0211,6470165.385,20012018
2001,1,369,17,3,1,1,0,1,0,0,18,6/5/01,JDOHERTY,GLBA,L,4792.89841,1.917159364,0,6468485.342,441368.216,6470875.542,445518.1754,444529.7697,6470245.852,20013018
2001,2,369,15,0,1,0,0,0,4,0,,6/7/01,JDOHERTY,GLBA,L,7393.28357,2.957313428,0,6472075.673,439589.2403,6475768.571,445994.9042,,,
2001,3,369,5,0,1,0,0,0,0,0,,6/9/01,JDOHERTY,GLBA,L,4149.8018,1.65992072,0,6478010.362,438677.9727,6480090.236,442270.5973,,,
2001,4,369,5,0,1,0,0,0,0,0,,6/30/200,JDOHERTY,GLBA,L,4149.8018,1.65992072,0,6478010.362,438677.9727,6480090.236,442270.5973,,,
2001,5,369,5,1,1,1,0,1,0,0,87,7/1/01,JDOHERTY,GLBA,L,4149.8018,1.65992072,0,6478010.362,438677.9727,6480090.236,442270.5973,439429.4139,6477979.461,20011087
2001,1,370,17,0,1,0,0,0,4,0,,6/5/01,JDOHERTY,GLBA,L,3953.62965,1.58145186,0,6466443.858,442626.2532,6468418.429,446049.9859,,,
2001,2,370,15,0,1,0,0,0,2,0,,6/7/01,JDOHERTY,GLBA,L,6989.58756,2.795835024,0,6469418.686,439782.5276,6472912.616,445838.715,,,
2001,3,370,5,1,1,1,0,1,0,0,47,6/9/01,JDOHERTY,GLBA,L,6954.12959,2.781651836,0,6475353,438889.6795,6478845.94,444908.5605,441802.6413,6477030.511,20011047
2001,4,370,5,1,1,2,0,2,0,0,67,6/30/200,JDOHERTY,GLBA,L,6954.12959,2.781651836,0,6475353,438889.6795,6478845.94,444908.5605,443522.1498,6478039.748,20011067
2001,4,370,5,2,1,1,0,1,0,0,,6/30/200,JDOHERTY,GLBA,L,6954.12959,2.781651836,0,6475353,438889.6795,6478845.94,444908.5605,440014.5254,6475979.715,
2001,4,370,5,3,1,1,0,1,0,0,,6/30/200,JDOHERTY,GLBA,L,6954.12959,2.781651836,0,6475353,438889.6795,6478845.94,444908.5605,439696.3736,6475804.732,
2001,4,370,5,4,1,1,0,1,0,0,,6/30/200,JDOHERTY,GLBA,L,6954.12959,2.781651836,0,6475353,438889.6795,6478845.94,444908.5605,439306.6377,6475574.072,
2001,5,370,5,0,1,0,0,0,0,0,,7/1/01,JDOHERTY,GLBA,L,6954.12959,2.781651836,0,6475353,438889.6795,6478845.94,444908.5605,,,
2001,2,371,15,0,1,0,0,0,4,0,,6/7/01,JDOHERTY,GLBA,L,4404.2931,1.76171724,0,6467774.597,441738.1798,6469965.784,445544.588,,,
2001,3,371,5,1,1,1,0,1,1,0,43,6/9/01,JDOHERTY,GLBA,L,7328.15779,2.931263116,0,6472876.999,439377.4105,6476533.245,445723.0878,443115.3275,6474568.253,20011043
2001,3,371,5,2,1,1,0,1,1,0,,6/9/01,JDOHERTY,GLBA,L,7328.15779,2.931263116,0,6472876.999,439377.4105,6476533.245,445723.0878,442758.0284,6474311.93,
2001,4,371,5,1,1,1,1,2,0,0,66,6/30/200,JDOHERTY,GLBA,L,7328.15779,2.931263116,0,6472876.999,439377.4105,6476533.245,445723.0878,439823.6348,6473108.395,20011066
2001,4,371,5,2,1,1,0,1,0,0,,6/30/200,JDOHERTY,GLBA,L,7328.15779,2.931263116,0,6472876.999,439377.4105,6476533.245,445723.0878,440133.8324,6473283.379,
2001,4,371,5,3,1,1,0,1,0,0,,6/30/200,JDOHERTY,GLBA,L,7328.15779,2.931263116,0,6472876.999,439377.4105,6476533.245,445723.0878,442997.1987,6474961.629,
2001,5,371,5,1,1,1,0,1,0,0,88,7/1/01,JDOHERTY,GLBA,L,7328.15779,2.931263116,0,6472876.999,439377.4105,6476533.245,445723.0878,441096.3393,6473410.133,20011088
2001,2,372,15,0,1,0,0,0,4,0,,6/7/01,JDOHERTY,GLBA,L,1849.55705,0.73982282,0,6466185.488,443813.3742,6467128.15,445407.7504,,,
2001,3,372,5,0,1,0,0,0,3,0,,6/9/01,JDOHERTY,GLBA,L,6383.85769,2.553543076,0,6470653.723,440337.6979,6473840.26,445861.2344,,,
2001,4,372,5,1,1,1,0,1,0,0,64,6/30/200,JDOHERTY,GLBA,L,6383.85769,2.553543076,0,6470653.723,440337.6979,6473840.26,445861.2344,443283.5351,6471859.649,20011064
2001,5,372,5,1,1,1,0,1,0,0,89,7/1/01,JDOHERTY,GLBA,L,6383.85769,2.553543076,0,6470653.723,440337.6979,6473840.26,445861.2344,444959.6765,6472841.418,20011089
2001,3,373,5,0,1,0,0,0,4,0,,6/9/01,JDOHERTY,GLBA,L,4398.16656,1.759266624,0,6468503.462,441397.753,6470694.319,445203.667,,,
2001,4,373,5,0,1,0,0,0,0,0,,6/30/200,JDOHERTY,GLBA,L,4398.16656,1.759266624,0,6468503.462,441397.753,6470694.319,445203.667,,,
2001,5,373,5,1,1,1,0,1,0,0,90,7/1/01,JDOHERTY,GLBA,L,4398.16656,1.759266624,0,6468503.462,441397.753,6470694.319,445203.667,442018.0477,6468370.143,20011090
2001,4,374,5,0,1,0,0,0,0,0,,6/30/200,JDOHERTY,GLBA,L,3795.2382,1.51809528,0,6466407.6,442567.1603,6468291.218,445853.1252,,,
2001,5,374,5,0,1,0,0,0,0,0,,7/1/01,JDOHERTY,GLBA,L,3795.2382,1.51809528,0,6466407.6,442567.1603,6468291.218,445853.1252,,,
2002,3,131,16,0,1,0,0,0,0,0,,5/8/02,JDOHERTY,GLBA,H,452.53679,0.181014716,0,6512953.75,440001.2427,6512952.345,440453.599,,,
2002,3,135,16,0,1,0,0,0,2,0,,5/8/02,JDOHERTY,GLBA,H,989.09569,0.395638276,0,6511753.385,440691.8381,6511753.226,441681.7694,,,
2002,5,135,1,0,1,0,0,0,4,0,,5/18/200,JDOHERTY,GLBA,H,505.0054,0.20200216,0,6513353.022,439747.9811,6513352.639,440252.3884,,,
2002,2,137,6,1,1,1,0,1,0,0,50,5/7/02,JDOHERTY,GLBA,H,448.69942,0.179479768,0,6512153.912,440595.6986,6512152.635,441044.2886,440920.4305,6512234.977,20021050
2002,5,137,1,0,1,0,0,0,4,0,,5/18/200,JDOHERTY,GLBA,H,448.69942,0.179479768,0,6512153.912,440595.6986,6512152.635,441044.2886,,,
2002,1,137,11,0,1,0,0,0,0,0,,5/6/02,JDOHERTY,GLBA,H,707.83781,0.283135124,0,6512553.04,440228.49,6512553.342,440935.5859,,,
2002,4,137,8,0,1,0,0,0,0,0,,5/14/200,JDOHERTY,GLBA,H,707.83781,0.283135124,0,6512553.04,440228.49,6512553.342,440935.5859,,,
2002,3,138,16,0,1,0,0,0,4,0,,5/8/02,JDOHERTY,GLBA,H,2397.53307,0.959013228,0,6510553.505,440143.6247,6510554.389,442541.057,,,
2002,2,140,6,0,1,0,0,0,0,0,,5/7/02,JDOHERTY,GLBA,H,1816.43149,0.726572596,0,6510953.445,440447.9954,6510953.822,442265.1813,,,
2002,5,140,1,0,1,0,0,0,0,0,,5/18/200,JDOHERTY,GLBA,H,1816.43149,0.726572596,0,6510953.445,440447.9954,6510953.822,442265.1813,,,
2002,1,140,11,0,1,0,0,0,1,0,,5/6/02,JDOHERTY,GLBA,H,1475.65829,0.590263316,0,6511353.661,440614.3204,6511353.63,442089.7216,,,
2002,4,140,8,0,1,0,0,0,0,0,,5/14/200,JDOHERTY,GLBA,H,1475.65829,0.590263316,0,6511353.661,440614.3204,6511353.63,442089.7216,,,
2002,3,141,16,0,1,0,0,0,2,0,,5/8/02,JDOHERTY,GLBA,H,657.53232,0.263012928,0,6509353.931,438049.3777,6509354.632,438706.8736,,,
2002,1,143,11,0,1,0,0,0,0,0,,5/6/02,JDOHERTY,GLBA,H,805.24171,0.322096684,0,6510152.505,441982.9918,6510153.533,442788.9784,,,
2002,4,143,8,0,1,0,0,0,0,0,,5/14/200,JDOHERTY,GLBA,H,805.24171,0.322096684,0,6510152.505,441982.9918,6510153.533,442788.9784,,,
2002,2,144,6,0,1,0,0,0,0,0,,5/7/02,JDOHERTY,GLBA,H,607.93255,0.24317302,0,6509753.761,442336.1365,6509754.054,442944.2999,,,
2002,5,144,1,0,1,0,0,0,4,0,,5/18/200,JDOHERTY,GLBA,H,607.93255,0.24317302,0,6509753.761,442336.1365,6509754.054,442944.2999,,,
2002,3,147,16,0,1,0,0,0,4,0,,5/8/02,JDOHERTY,GLBA,H,763.55002,0.305420008,0,6506954.186,432790.313,6506954.053,433553.5432,,,
2002,1,147,11,0,1,0,0,0,0,0,,5/6/02,JDOHERTY,GLBA,H,1034.89948,0.413959792,0,6508954.687,442276.9553,6508952.415,443312.9354,,,
2002,4,147,8,0,1,0,0,0,0,0,,5/14/200,JDOHERTY,GLBA,H,1034.89948,0.413959792,0,6508954.687,442276.9553,6508952.415,443312.9354,,,
2002,3,148,16,0,1,0,0,0,4,0,,5/8/02,JDOHERTY,GLBA,H,522.68859,0.209075436,0,6506954.06,442264.6052,6506953.754,442787.2224,,,
2002,3,149,16,0,1,0,0,0,4,0,,5/8/02,JDOHERTY,GLBA,H,596.5184,0.23860736,0,6506953.534,444206.303,6506954.287,444803.309,,,
2002,2,149,6,0,1,0,0,0,0,0,,5/7/02,JDOHERTY,GLBA,H,584.40863,0.233763452,0,6507352.945,433023.2592,6507352.195,433607.6866,,,
2002,5,149,1,0,1,0,0,0,4,0,,5/18/200,JDOHERTY,GLBA,H,584.40863,0.233763452,0,6507352.945,433023.2592,6507352.195,433607.6866,,,
2002,2,150,6,0,1,0,0,0,0,0,,5/7/02,JDOHERTY,GLBA,H,1261.37854,0.504551416,0,6507352.648,441921.8263,6507354.411,443183.3555,,,
2002,5,150,1,0,1,0,0,0,4,0,,5/18/200,JDOHERTY,GLBA,H,1261.37854,0.504551416,0,6507352.648,441921.8263,6507354.411,443183.3555,,,
2002,3,152,16,0,1,0,0,0,2,0,,5/8/02,JDOHERTY,GLBA,H,2842.45924,1.136983696,0,6505754.545,441553.9228,6505753.673,444396.8325,,,
2002,1,153,11,0,1,0,0,0,4,0,,5/6/02,JDOHERTY,GLBA,H,555.47651,0.222190604,0,6506553.756,432976.6312,6506553.495,433532.2004,,,
2002,4,153,8,0,1,0,0,0,4,0,,5/14/200,JDOHERTY,GLBA,H,555.47651,0.222190604,0,6506553.756,432976.6312,6506553.495,433532.2004,,,
2002,1,154,11,0,1,0,0,0,0,0,,5/6/02,JDOHERTY,GLBA,H,514.97664,0.205990656,0,6506554.22,442068.3366,6506554.003,442583.2803,,,
2002,4,154,8,0,1,0,0,0,0,0,,5/14/200,JDOHERTY,GLBA,H,514.97664,0.205990656,0,6506554.22,442068.3366,6506554.003,442583.2803,,,
2002,3,155,16,0,1,0,0,0,4,0,,5/8/02,JDOHERTY,GLBA,H,1286.46316,0.514585264,0,6504554.613,427997.2763,6504553.294,429283.0432,,,
2002,2,155,6,0,1,0,0,0,0,0,,5/7/02,JDOHERTY,GLBA,H,1338.80387,0.535521548,0,6504953.954,443225.5763,6504953.198,444564.1869,,,
2002,5,155,1,0,1,0,0,0,2,0,,5/18/200,JDOHERTY,GLBA,H,1338.80387,0.535521548,0,6504953.954,443225.5763,6504953.198,444564.1869,,,
2002,1,155,11,0,1,0,0,0,0,0,,5/6/02,JDOHERTY,GLBA,H,1585.6331,0.63425324,0,6506553.881,443096.2911,6506553.263,444681.6793,,,
2002,4,155,8,0,1,0,0,0,0,0,,5/14/200,JDOHERTY,GLBA,H,1585.6331,0.63425324,0,6506553.881,443096.2911,6506553.263,444681.6793,,,
2002,3,156,16,0,1,0,0,0,0,0,,5/8/02,JDOHERTY,GLBA,H,1320.77127,0.528308508,0,6504553.809,443300.9298,6504555.199,444621.3421,,,
2002,3,158,16,0,1,0,0,0,0,0,,5/8/02,JDOHERTY,GLBA,H,1066.06223,0.426424892,0,6503354.322,424247.9036,6503354.117,425314.6127,,,
2002,2,158,6,0,1,0,0,0,0,0,,5/7/02,JDOHERTY,GLBA,H,597.25254,0.238901016,0,6503754.219,423921.1049,6503753.715,424518.7062,,,
2002,5,158,1,0,1,0,0,0,4,0,,5/18/200,JDOHERTY,GLBA,H,597.25254,0.238901016,0,6503754.219,423921.1049,6503753.715,424518.7062,,,
2002,1,158,11,0,1,0,0,0,2,0,,5/6/02,JDOHERTY,GLBA,H,1669.53116,0.667812464,0,6505353.975,442779.1316,6505353.884,444449.0986,,,
2002,4,158,8,0,1,0,0,0,0,0,,5/14/200,JDOHERTY,GLBA,H,1669.53116,0.667812464,0,6505353.975,442779.1316,6505353.884,444449.0986,,,
2002,3,159,16,0,1,0,0,0,0,0,,5/8/02,JDOHERTY,GLBA,H,458.53693,0.183414772,0,6503354.623,427346.4649,6503353.498,427805.8025,,,
2002,2,159,6,0,1,0,0,0,0,0,,5/7/02,JDOHERTY,GLBA,H,509.97606,0.203990424,0,6503753.49,427457.38,6503753.285,427967.936,,,
2002,5,159,1,0,1,0,0,0,0,0,,5/18/200,JDOHERTY,GLBA,H,509.97606,0.203990424,0,6503753.49,427457.38,6503753.285,427967.936,,,
2002,3,160,16,0,1,0,0,0,4,0,,5/8/02,JDOHERTY,GLBA,H,430.27603,0.172110412,0,6503354.385,429477.8631,6503354.051,429907.226,,,
2002,2,160,6,0,1,0,0,0,0,0,,5/7/02,JDOHERTY,GLBA,H,485.33536,0.194134144,0,6503753.877,429352.6319,6503754.372,429838.0494,,,
2002,3,161,16,0,1,0,0,0,0,0,,5/8/02,JDOHERTY,GLBA,H,1059.24228,0.423696912,0,6503354.354,437862.7747,6503354.277,438922.562,,,
2002,2,161,6,0,1,0,0,0,0,0,,5/7/02,JDOHERTY,GLBA,H,1603.97032,0.641588128,0,6503753.35,443209.0135,6503754.393,444812.9679,,,
2002,5,161,1,0,1,0,0,0,4,0,,5/18/200,JDOHERTY,GLBA,H,1603.97032,0.641588128,0,6503753.35,443209.0135,6503754.393,444812.9679,,,
2002,1,161,11,0,1,0,0,0,0,0,,5/6/02,JDOHERTY,GLBA,H,450.38464,0.180153856,0,6504152.908,427738.4528,6504153.826,428189.9972,,,
2002,4,161,8,0,1,0,0,0,0,0,,5/14/200,JDOHERTY,GLBA,H,450.38464,0.180153856,0,6504152.908,427738.4528,6504153.826,428189.9972,,,
2002,3,162,16,0,1,0,0,0,0,0,,5/8/02,JDOHERTY,GLBA,H,1902.26542,0.760906168,0,6503355.122,443026.2538,6503353.707,444929.1133,,,
2002,1,162,11,0,1,0,0,0,2,0,,5/6/02,JDOHERTY,GLBA,H,460.92404,0.184369616,0,6504153.365,429125.9088,6504154.286,429586.147,,,
2002,4,162,8,0,1,0,0,0,0,0,,5/14/200,JDOHERTY,GLBA,H,460.92404,0.184369616,0,6504153.365,429125.9088,6504154.286,429586.147,,,
2002,2,163,6,0,1,0,0,0,0,0,,5/7/02,JDOHERTY,GLBA,H,499.37632,0.199750528,0,6502554.347,429377.2764,6502554.603,429876.3802,,,
2002,1,163,11,0,1,0,0,0,4,0,,5/6/02,JDOHERTY,GLBA,H,895.48987,0.358195948,0,6504154.316,437746.9719,6504154.94,438642.2045,,,
2002,4,163,8,0,1,0,0,0,0,0,,5/14/200,JDOHERTY,GLBA,H,895.48987,0.358195948,0,6504154.316,437746.9719,6504154.94,438642.2045,,,
2002,2,164,6,0,1,0,0,0,0,0,,5/7/02,JDOHERTY,GLBA,H,1845.73914,0.738295656,0,6501354.88,426391.8645,6501353.844,428237.0006,,,
2002,5,164,1,0,1,0,0,0,4,0,,5/18/200,JDOHERTY,GLBA,H,1845.73914,0.738295656,0,6501354.88,426391.8645,6501353.844,428237.0006,,,
2002,3,164,16,0,1,0,0,0,4,0,,5/8/02,JDOHERTY,GLBA,H,2174.08112,0.869632448,0,6502153.745,425768.4947,6502153.733,427942.1885,,,
2002,1,164,11,1,1,11,0,11,4,0,23,5/6/02,JDOHERTY,GLBA,H,1418.15244,0.567260976,0,6504152.994,443295.0861,6504154.849,444713.2788,443567.1243,6504232.798,20021023
2002,4,164,8,0,1,0,0,0,0,0,,5/14/200,JDOHERTY,GLBA,H,1418.15244,0.567260976,0,6504152.994,443295.0861,6504154.849,444713.2788,,,
2002,2,165,6,0,1,0,0,0,0,0,,5/7/02,JDOHERTY,GLBA,H,437.95384,0.175181536,0,6501354.241,429638.9906,6501353.77,430077.2787,,,
2002,3,165,16,0,1,0,0,0,1,0,,5/8/02,JDOHERTY,GLBA,H,440.23296,0.176093184,0,6502154.404,429425.1576,6502153.873,429865.2907,,,
2002,3,166,16,0,1,0,0,0,0,0,,5/8/02,JDOHERTY,GLBA,H,428.85101,0.171540404,0,6502154.388,438272.108,6502155.04,438700.613,,,
2002,1,166,11,0,1,0,0,0,0,0,,5/6/02,JDOHERTY,GLBA,H,998.2203,0.39928812,0,6502953.971,424791.4148,6502953.37,425789.5485,,,
2002,4,166,8,0,1,0,0,0,0,0,,5/14/200,JDOHERTY,GLBA,H,998.2203,0.39928812,0,6502953.971,424791.4148,6502953.37,425789.5485,,,
2002,2,167,6,0,1,0,0,0,0,0,,5/7/02,JDOHERTY,GLBA,H,2151.54776,0.860619104,0,6500153.915,426885.0381,6500154.956,429036.6109,,,
2002,5,167,1,0,1,0,0,0,4,0,,5/18/200,JDOHERTY,GLBA,H,2151.54776,0.860619104,0,6500153.915,426885.0381,6500154.956,429036.6109,,,
2002,1,167,11,0,1,0,0,0,0,0,,5/6/02,JDOHERTY,GLBA,H,391.52942,0.156611768,0,6502953.091,427279.0023,6502953.233,427669.7417,,,
2002,4,167,8,0,1,0,0,0,0,0,,5/14/200,JDOHERTY,GLBA,H,391.52942,0.156611768,0,6502953.091,427279.0023,6502953.233,427669.7417,,,
2002,2,168,6,0,1,0,0,0,0,0,,5/7/02,JDOHERTY,GLBA,H,554.28343,0.221713372,0,6500154.896,429962.8362,6500154.246,430517.3945,,,
2002,3,168,16,0,1,0,0,0,4,0,,5/8/02,JDOHERTY,GLBA,H,1858.90775,0.7435631,0,6500954.271,426571.0527,6500954.928,428429.953,,,
2002,1,168,11,0,1,0,0,0,3,0,,5/6/02,JDOHERTY,GLBA,H,406.3626,0.16254504,0,6502953.865,429557.6466,6502953.958,429963.8496,,,
2002,2,169,6,1,1,1,0,1,0,0,46,5/7/02,JDOHERTY,GLBA,H,1281.39394,0.512557576,0,6500155.035,441916.8438,6500154.714,443197.129,442452.098,6500237.77,20021046
2002,5,169,1,0,1,0,0,0,1,0,,5/18/200,JDOHERTY,GLBA,H,1281.39394,0.512557576,0,6500155.035,441916.8438,6500154.714,443197.129,,,
2002,3,169,16,0,1,0,0,0,0,0,,5/8/02,JDOHERTY,GLBA,H,547.85802,0.219143208,0,6500953.09,429548.5233,6500954.356,430096.2318,,,
2002,1,169,11,0,1,0,0,0,2,0,,5/6/02,JDOHERTY,GLBA,H,3755.33628,1.502134512,0,6502955.227,441334.873,6502954.238,445090.7504,,,
2002,4,169,8,0,1,0,0,0,1,0,,5/14/200,JDOHERTY,GLBA,H,3755.33628,1.502134512,0,6502955.227,441334.873,6502954.238,445090.7504,,,
2002,2,170,6,0,1,0,0,0,0,0,,5/7/02,JDOHERTY,GLBA,H,686.10646,0.274442584,0,6500155.197,445900.8907,6500155.007,446586.9778,,,
2002,5,170,1,0,1,0,0,0,4,0,,5/18/200,JDOHERTY,GLBA,H,686.10646,0.274442584,0,6500155.197,445900.8907,6500155.007,446586.9778,,,
2002,3,170,16,0,1,0,0,0,0,0,,5/8/02,JDOHERTY,GLBA,H,1684.96843,0.673987372,0,6500955.124,438640.1113,6500954.914,440325.5736,,,
2002,1,170,11,0,1,0,0,0,0,0,,5/6/02,JDOHERTY,GLBA,H,2066.13721,0.826454884,0,6501752.903,426055.9338,6501753.196,428121.4939,,,
2002,4,170,8,0,1,0,0,0,0,0,,5/14/200,JDOHERTY,GLBA,H,2066.13721,0.826454884,0,6501752.903,426055.9338,6501753.196,428121.4939,,,
2002,3,171,16,0,1,0,0,0,4,0,,5/8/02,JDOHERTY,GLBA,H,1219.70866,0.487883464,0,6500954.209,444645.5371,6500953.761,445865.5433,,,
2002,2,173,6,0,1,0,0,0,0,0,,5/7/02,JDOHERTY,GLBA,H,3035.57701,1.214230804,0,6498953.187,428069.8002,6498954.026,431104.9373,,,
2002,5,173,1,0,1,0,0,0,4,0,,5/18/200,JDOHERTY,GLBA,H,3035.57701,1.214230804,0,6498953.187,428069.8002,6498954.026,431104.9373,,,
2002,1,173,11,0,1,0,0,0,0,0,,5/6/02,JDOHERTY,GLBA,H,1864.85185,0.74594074,0,6500553.634,426752.2141,6500554.273,428617.1078,,,
2002,4,173,8,0,1,0,0,0,0,0,,5/14/200,JDOHERTY,GLBA,H,1864.85185,0.74594074,0,6500553.634,426752.2141,6500554.273,428617.1078,,,
2002,2,174,6,0,1,0,0,0,0,0,,5/7/02,JDOHERTY,GLBA,H,413.82361,0.165529444,0,6498955.493,431548.363,6498953.805,431962.6883,,,
2002,5,174,1,0,1,0,0,0,4,0,,5/18/200,JDOHERTY,GLBA,H,413.82361,0.165529444,0,6498955.493,431548.363,6498953.805,431962.6883,,,
2002,3,174,16,0,1,0,0,0,0,0,,5/8/02,JDOHERTY,GLBA,H,2469.40992,0.987763968,0,6499754.534,427099.206,6499753.638,429569.4129,,,
2002,1,174,11,0,1,0,0,0,0,0,,5/6/02,JDOHERTY,GLBA,H,405.23249,0.162092996,0,6500554.405,429835.5039,6500554.545,430240.9888,,,
2002,4,174,8,0,1,0,0,0,0,0,,5/14/200,JDOHERTY,GLBA,H,405.23249,0.162092996,0,6500554.405,429835.5039,6500554.545,430240.9888,,,
2002,2,175,6,0,1,0,0,0,0,0,,5/7/02,JDOHERTY,GLBA,H,463.08531,0.185234124,0,6498954.5,445891.9581,6498953.67,446354.6438,,,
2002,5,175,1,0,1,0,0,0,2,0,,5/18/200,JDOHERTY,GLBA,H,463.08531,0.185234124,0,6498954.5,445891.9581,6498953.67,446354.6438,,,
2002,3,175,16,0,1,0,0,0,2,0,,5/8/02,JDOHERTY,GLBA,H,1279.06211,0.511624844,0,6499754.789,430020.4933,6499754.303,431299.1213,,,
2002,1,175,11,0,1,0,0,0,4,0,,5/6/02,JDOHERTY,GLBA,H,664.78813,0.265915252,0,6500555.799,445522.3212,6500553.98,446187.0303,,,
2002,4,175,8,0,1,0,0,0,4,0,,5/14/200,JDOHERTY,GLBA,H,664.78813,0.265915252,0,6500555.799,445522.3212,6500553.98,446187.0303,,,
2002,3,176,16,0,1,0,0,0,0,0,,5/8/02,JDOHERTY,GLBA,H,546.50322,0.218601288,0,6499755.002,442483.8279,6499754.391,443030.6345,,,
2002,3,177,16,0,1,0,0,0,4,0,,5/8/02,JDOHERTY,GLBA,H,546.89782,0.218759128,0,6499754.888,446126.6317,6499754.788,446673.4286,,,
2002,2,178,6,0,1,0,0,0,0,0,,5/7/02,JDOHERTY,GLBA,H,2283.98083,0.913592332,0,6497753.538,429626.225,6497753.817,431909.7793,,,
2002,5,178,1,0,1,0,0,0,4,0,,5/18/200,JDOHERTY,GLBA,H,2283.98083,0.913592332,0,6497753.538,429626.225,6497753.817,431909.7793,,,
2002,1,178,11,0,1,0,0,0,4,0,,5/6/02,JDOHERTY,GLBA,H,408.43961,0.163375844,0,6499354.522,445954.6187,6499354.459,446362.0973,,,
2002,4,178,8,0,1,0,0,0,4,0,,5/14/200,JDOHERTY,GLBA,H,408.43961,0.163375844,0,6499354.522,445954.6187,6499354.459,446362.0973,,,
2002,2,179,6,0,1,0,0,0,0,0,,5/7/02,JDOHERTY,GLBA,H,405.28768,0.162115072,0,6497755.631,446693.5098,6497755.685,447098.2499,,,
2002,5,179,1,0,1,0,0,0,2,0,,5/18/200,JDOHERTY,GLBA,H,405.28768,0.162115072,0,6497755.631,446693.5098,6497755.685,447098.2499,,,
2002,3,180,16,0,1,0,0,0,4,0,,5/8/02,JDOHERTY,GLBA,H,3743.54847,1.497419388,0,6498554.755,428438.1283,6498554.657,432180.3443,,,
2002,4,181,8,0,1,0,0,0,4,0,,5/14/200,JDOHERTY,GLBA,H,406.15687,0.162462748,0,6498154.391,446713.4855,6498154.421,447120.1205,,,
2002,3,181,16,0,1,0,0,0,4,0,,5/8/02,JDOHERTY,GLBA,H,951.32428,0.380529712,0,6498554.446,446099.3821,6498554.392,447051.0047,,,
2002,2,182,6,0,1,0,0,0,0,0,,5/7/02,JDOHERTY,GLBA,H,3132.09873,1.252839492,0,6496555.097,430211.018,6496554.137,433342.8518,,,
2002,5,182,1,0,1,0,0,0,4,0,,5/18/200,JDOHERTY,GLBA,H,3132.09873,1.252839492,0,6496555.097,430211.018,6496554.137,433342.8518,,,
2002,2,183,6,2,1,6,0,6,0,0,,5/7/02,JDOHERTY,GLBA,H,2218.42762,0.887371048,0,6496555.62,441584.2148,6496554.565,443803.2848,442492.7632,6496740.562,
2002,2,183,6,3,1,1,0,1,0,0,,5/7/02,JDOHERTY,GLBA,H,2218.42762,0.887371048,0,6496555.62,441584.2148,6496554.565,443803.2848,442655.424,6496638.899,
2002,2,183,6,4,1,2,0,2,0,0,,5/7/02,JDOHERTY,GLBA,H,2218.42762,0.887371048,0,6496555.62,441584.2148,6496554.565,443803.2848,442797.7523,6496740.562,
2002,2,183,6,5,1,2,0,2,0,0,,5/7/02,JDOHERTY,GLBA,H,2218.42762,0.887371048,0,6496555.62,441584.2148,6496554.565,443803.2848,442940.0805,6496638.899,
2002,2,183,6,1,1,1,0,1,0,0,44,5/7/02,JDOHERTY,GLBA,H,2218.42762,0.887371048,0,6496555.62,441584.2148,6496554.565,443803.2848,442126.7764,6496659.232,20021044
2002,5,183,1,4,1,1,0,1,4,0,,5/18/200,JDOHERTY,GLBA,H,2218.42762,0.887371048,0,6496555.62,441584.2148,6496554.565,443803.2848,441758.7151,6496672.277,
2002,5,183,1,1,1,1,0,1,4,0,119,5/18/200,JDOHERTY,GLBA,H,2218.42762,0.887371048,0,6496555.62,441584.2148,6496554.565,443803.2848,442110.3441,6496700.408,20021119
2002,5,183,1,2,1,1,0,1,4,0,119,5/18/200,JDOHERTY,GLBA,H,2218.42762,0.887371048,0,6496555.62,441584.2148,6496554.565,443803.2848,442110.3441,6496545.691,20022119
2002,5,183,1,3,1,1,0,1,4,0,119,5/18/200,JDOHERTY,GLBA,H,2218.42762,0.887371048,0,6496555.62,441584.2148,6496554.565,443803.2848,442011.888,6496630.082,20023119
2002,2,184,6,0,1,0,0,0,0,0,,5/7/02,JDOHERTY,GLBA,H,694.50328,0.277801312,0,6496554.794,447104.2313,6496554.717,447798.6953,,,
2002,5,184,1,0,1,0,0,0,4,0,,5/18/200,JDOHERTY,GLBA,H,694.50328,0.277801312,0,6496554.794,447104.2313,6496554.717,447798.6953,,,
2002,3,184,16,0,1,0,0,0,3,0,,5/8/02,JDOHERTY,GLBA,H,2329.16948,0.931667792,0,6497354.513,429932.8274,6497354.2,432261.1484,,,
2002,1,185,11,1,1,1,0,1,4,0,,5/6/02,JDOHERTY,GLBA,H,1537.37009,0.614948036,0,6496955.385,441659.9364,6496954.964,443196.96,442022.5441,6497209.088,
2002,1,185,11,2,1,1,0,1,4,0,,5/6/02,JDOHERTY,GLBA,H,1537.37009,0.614948036,0,6496955.385,441659.9364,6496954.964,443196.96,441916.9897,6497177.422,
2002,1,185,11,3,1,1,0,1,4,0,,5/6/02,JDOHERTY,GLBA,H,1537.37009,0.614948036,0,6496955.385,441659.9364,6496954.964,443196.96,441843.1016,6497061.312,
2002,1,185,11,4,1,1,0,1,4,0,,5/6/02,JDOHERTY,GLBA,H,1537.37009,0.614948036,0,6496955.385,441659.9364,6496954.964,443196.96,441832.5462,6496902.98,
2002,1,185,11,5,1,4,0,4,4,0,,5/6/02,JDOHERTY,GLBA,H,1537.37009,0.614948036,0,6496955.385,441659.9364,6496954.964,443196.96,442845.8683,6497092.978,
2002,1,185,11,6,1,2,0,2,4,0,,5/6/02,JDOHERTY,GLBA,H,1537.37009,0.614948036,0,6496955.385,441659.9364,6496954.964,443196.96,442613.6486,6497114.089,
2002,1,185,11,7,1,1,0,1,4,0,,5/6/02,JDOHERTY,GLBA,H,1537.37009,0.614948036,0,6496955.385,441659.9364,6496954.964,443196.96,443249.4946,6497013.213,
2002,1,185,11,8,1,1,0,1,4,0,,5/6/02,JDOHERTY,GLBA,H,1537.37009,0.614948036,0,6496955.385,441659.9364,6496954.964,443196.96,443249.4946,6497165.036,
2002,1,185,11,9,1,1,0,1,4,0,,5/6/02,JDOHERTY,GLBA,H,1537.37009,0.614948036,0,6496955.385,441659.9364,6496954.964,443196.96,443081.6902,6497021.204,
2002,1,185,11,10,1,1,0,1,4,0,,5/6/02,JDOHERTY,GLBA,H,1537.37009,0.614948036,0,6496955.385,441659.9364,6496954.964,443196.96,443089.6809,6497196.999,
2002,1,185,11,11,1,1,0,1,4,0,,5/6/02,JDOHERTY,GLBA,H,1537.37009,0.614948036,0,6496955.385,441659.9364,6496954.964,443196.96,442254.7637,6496902.98,
2002,1,185,11,12,1,1,0,1,4,0,,5/6/02,JDOHERTY,GLBA,H,1537.37009,0.614948036,0,6496955.385,441659.9364,6496954.964,443196.96,442265.3191,6497061.312,
2002,1,185,11,13,1,1,0,1,4,0,,5/6/02,JDOHERTY,GLBA,H,1537.37009,0.614948036,0,6496955.385,441659.9364,6496954.964,443196.96,442233.6528,6497198.532,
2002,1,185,11,14,1,1,0,1,4,0,,5/6/02,JDOHERTY,GLBA,H,1537.37009,0.614948036,0,6496955.385,441659.9364,6496954.964,443196.96,442149.2093,6497092.978,
2002,1,185,11,15,1,1,0,1,4,0,,5/6/02,JDOHERTY,GLBA,H,1537.37009,0.614948036,0,6496955.385,441659.9364,6496954.964,443196.96,442106.9876,6496966.313,
2002,1,185,11,16,1,1,0,1,4,0,,5/6/02,JDOHERTY,GLBA,H,1537.37009,0.614948036,0,6496955.385,441659.9364,6496954.964,443196.96,442001.4332,6496881.869,
2002,1,185,11,17,1,1,0,1,4,0,,5/6/02,JDOHERTY,GLBA,H,1537.37009,0.614948036,0,6496955.385,441659.9364,6496954.964,443196.96,442011.9886,6497040.201,
2002,1,185,11,18,1,33,3,36,4,0,,5/6/02,JDOHERTY,GLBA,H,1537.37009,0.614948036,1,6496955.385,441659.9364,6496954.964,443196.96,442423.6507,6497008.535,
2002,4,185,8,5,1,1,0,1,4,0,,5/14/200,JDOHERTY,GLBA,H,1537.37009,0.614948036,0,6496955.385,441659.9364,6496954.964,443196.96,442033.9164,6496921.331,
2002,4,185,8,6,1,1,1,2,4,0,,5/14/200,JDOHERTY,GLBA,H,1537.37009,0.614948036,0,6496955.385,441659.9364,6496954.964,443196.96,441868.8508,6496931.648,
2002,4,185,8,7,1,1,0,1,4,0,,5/14/200,JDOHERTY,GLBA,H,1537.37009,0.614948036,0,6496955.385,441659.9364,6496954.964,443196.96,441951.3836,6497034.814,
2002,4,185,8,8,1,1,0,1,4,0,,5/14/200,JDOHERTY,GLBA,H,1537.37009,0.614948036,0,6496955.385,441659.9364,6496954.964,443196.96,441858.5342,6497148.297,
2002,4,185,8,9,1,100,55,155,4,0,,5/14/200,JDOHERTY,GLBA,H,1537.37009,0.614948036,1,6496955.385,441659.9364,6496954.964,443196.96,442518.7967,6497045.131,
2002,4,185,8,1,1,1,0,1,4,0,90,5/14/200,JDOHERTY,GLBA,H,1537.37009,0.614948036,0,6496955.385,441659.9364,6496954.964,443196.96,443168.7426,6497117.347,20021090
2002,4,185,8,2,1,1,0,1,4,0,90,5/14/200,JDOHERTY,GLBA,H,1537.37009,0.614948036,0,6496955.385,441659.9364,6496954.964,443196.96,443013.9936,6497117.347,20022090
2002,4,185,8,3,1,1,0,1,4,0,90,5/14/200,JDOHERTY,GLBA,H,1537.37009,0.614948036,0,6496955.385,441659.9364,6496954.964,443196.96,442983.0438,6497003.864,20023090
2002,4,185,8,4,1,1,0,1,4,0,90,5/14/200,JDOHERTY,GLBA,H,1537.37009,0.614948036,0,6496955.385,441659.9364,6496954.964,443196.96,443096.5264,6497003.864,20024090
2002,3,185,16,0,1,0,0,0,0,0,,5/8/02,JDOHERTY,GLBA,H,851.05375,0.3404215,0,6497354.758,434289.1963,6497353.511,435139.506,,,
2002,2,186,6,0,1,0,0,0,0,0,,5/7/02,JDOHERTY,GLBA,H,529.03392,0.211613568,0,6495354.326,435824.2607,6495354.941,436353.3275,,,
2002,5,186,1,0,1,0,0,0,4,0,,5/18/200,JDOHERTY,GLBA,H,529.03392,0.211613568,0,6495354.326,435824.2607,6495354.941,436353.3275,,,
2002,1,186,11,0,1,0,0,0,4,0,,5/6/02,JDOHERTY,GLBA,H,410.117,0.1640468,0,6496955.175,447141.6216,6496955.211,447551.2857,,,
2002,4,186,8,0,1,0,0,0,4,0,,5/14/200,JDOHERTY,GLBA,H,410.117,0.1640468,0,6496955.175,447141.6216,6496955.211,447551.2857,,,
2002,3,186,16,0,1,0,0,0,4,0,,5/8/02,JDOHERTY,GLBA,H,592.70624,0.237082496,0,6497354.79,446689.9652,6497354.154,447282.6024,,,
2002,2,187,6,2,1,1,0,1,0,0,,5/7/02,JDOHERTY,GLBA,H,4375.0807,1.75003228,0,6495354.925,441203.8552,6495354.557,445578.4418,442614.7588,6495520.606,
2002,2,187,6,3,1,1,0,1,0,0,,5/7/02,JDOHERTY,GLBA,H,4375.0807,1.75003228,0,6495354.925,441203.8552,6495354.557,445578.4418,442452.098,6495337.613,
2002,2,187,6,4,1,1,0,1,0,0,,5/7/02,JDOHERTY,GLBA,H,4375.0807,1.75003228,0,6495354.925,441203.8552,6495354.557,445578.4418,441801.4547,6495520.606,
2002,2,187,6,5,1,1,0,1,0,0,,5/7/02,JDOHERTY,GLBA,H,4375.0807,1.75003228,0,6495354.925,441203.8552,6495354.557,445578.4418,441659.1265,6495378.278,
2002,2,187,6,6,1,1,0,1,0,0,,5/7/02,JDOHERTY,GLBA,H,4375.0807,1.75003228,0,6495354.925,441203.8552,6495354.557,445578.4418,441577.7961,6495540.939,
2002,2,187,6,7,1,1,0,1,0,0,,5/7/02,JDOHERTY,GLBA,H,4375.0807,1.75003228,0,6495354.925,441203.8552,6495354.557,445578.4418,441394.8027,6495357.945,
2002,2,187,6,8,1,102,0,102,0,0,,5/7/02,JDOHERTY,GLBA,H,4375.0807,1.75003228,1,6495354.925,441203.8552,6495354.557,445578.4418,442980.7457,6495418.943,
2002,2,187,6,9,1,54,0,54,0,0,,5/7/02,JDOHERTY,GLBA,H,4375.0807,1.75003228,1,6495354.925,441203.8552,6495354.557,445578.4418,442167.4416,6495439.276,
2002,2,187,6,1,1,1,0,1,0,0,43,5/7/02,JDOHERTY,GLBA,H,4375.0807,1.75003228,0,6495354.925,441203.8552,6495354.557,445578.4418,443346.7325,6495459.608,20021043
2002,5,187,1,1,1,1,0,1,3,0,,5/18/200,JDOHERTY,GLBA,H,4375.0807,1.75003228,0,6495354.925,441203.8552,6495354.557,445578.4418,441449.2815,6495406.413,
2002,5,187,1,2,1,1,0,1,3,0,,5/18/200,JDOHERTY,GLBA,H,4375.0807,1.75003228,0,6495354.925,441203.8552,6495354.557,445578.4418,441561.8028,6495575.195,
2002,5,187,1,3,1,1,0,1,3,0,,5/18/200,JDOHERTY,GLBA,H,4375.0807,1.75003228,0,6495354.925,441203.8552,6495354.557,445578.4418,441997.8228,6495518.934,
2002,5,187,1,4,1,1,0,1,3,0,,5/18/200,JDOHERTY,GLBA,H,4375.0807,1.75003228,0,6495354.925,441203.8552,6495354.557,445578.4418,441941.5621,6495350.152,
2002,5,187,1,5,1,1,0,1,3,0,,5/18/200,JDOHERTY,GLBA,H,4375.0807,1.75003228,0,6495354.925,441203.8552,6495354.557,445578.4418,442222.8654,6495476.739,
2002,5,187,1,6,1,1,0,1,3,0,,5/18/200,JDOHERTY,GLBA,H,4375.0807,1.75003228,0,6495354.925,441203.8552,6495354.557,445578.4418,442419.7776,6495532.999,
2002,5,187,1,7,1,1,0,1,3,0,,5/18/200,JDOHERTY,GLBA,H,4375.0807,1.75003228,0,6495354.925,441203.8552,6495354.557,445578.4418,442560.4292,6495336.087,
2002,5,187,1,8,1,1,0,1,3,0,,5/18/200,JDOHERTY,GLBA,H,4375.0807,1.75003228,0,6495354.925,441203.8552,6495354.557,445578.4418,442757.3415,6495518.934,
2002,5,187,1,9,1,1,0,1,3,0,,5/18/200,JDOHERTY,GLBA,H,4375.0807,1.75003228,0,6495354.925,441203.8552,6495354.557,445578.4418,442883.9279,6495364.217,
2002,2,188,6,0,1,0,0,0,2,0,,5/7/02,JDOHERTY,GLBA,H,4944.34993,1.977739972,0,6495354.878,446359.3635,6495354.993,451303.4452,,,
2002,5,188,1,0,1,0,0,0,4,0,,5/18/200,JDOHERTY,GLBA,H,4944.34993,1.977739972,0,6495354.878,446359.3635,6495354.993,451303.4452,,,
2002,1,188,11,0,1,0,0,0,0,0,,5/6/02,JDOHERTY,GLBA,H,1159.1977,0.46367908,0,6495753.989,428732.62,6495755.264,429891.4926,,,
2002,4,188,8,0,1,0,0,0,0,0,,5/14/200,JDOHERTY,GLBA,H,1159.1977,0.46367908,0,6495753.989,428732.62,6495755.264,429891.4926,,,
2002,2,189,6,0,1,0,0,0,4,0,,5/7/02,JDOHERTY,GLBA,H,907.71584,0.363086336,0,6494154.884,429091.1437,6494155.212,429998.4447,,,
2002,1,189,11,0,1,0,0,0,4,0,,5/6/02,JDOHERTY,GLBA,H,2619.14602,1.047658408,0,6495753.787,430388.5268,6495754.335,433007.5082,,,
2002,4,189,8,0,1,0,0,0,4,0,,5/14/200,JDOHERTY,GLBA,H,2619.14602,1.047658408,0,6495753.787,430388.5268,6495754.335,433007.5082,,,
2002,3,189,16,0,1,0,0,0,0,0,,5/8/02,JDOHERTY,GLBA,H,571.75338,0.228701352,0,6496154.132,428674.0485,6496154.84,429246.6472,,,
2002,2,190,6,0,1,0,0,0,0,0,,5/7/02,JDOHERTY,GLBA,H,3105.09902,1.242039608,0,6494154.256,430675.9851,6494156.032,433780.6982,,,
2002,1,190,11,0,1,0,0,0,0,0,,5/6/02,JDOHERTY,GLBA,H,428.95745,0.17158298,0,6495754.37,435651.5993,6495754.754,436079.8469,,,
2002,4,190,8,0,1,0,0,0,0,0,,5/14/200,JDOHERTY,GLBA,H,428.95745,0.17158298,0,6495754.37,435651.5993,6495754.754,436079.8469,,,
2002,3,190,16,0,1,0,0,0,4,0,,5/8/02,JDOHERTY,GLBA,H,2643.59966,1.057439864,0,6496153.927,430432.4824,6496155.927,433076.4083,,,
2002,2,191,6,0,1,0,0,0,0,0,,5/7/02,JDOHERTY,GLBA,H,515.51441,0.206205764,0,6494155.288,436278.5104,6494156.2,436793.2031,,,
2002,5,191,1,0,1,0,0,0,0,0,,5/18/200,JDOHERTY,GLBA,H,515.51441,0.206205764,0,6494155.288,436278.5104,6494156.2,436793.2031,,,
2002,1,191,11,6,1,1,0,1,4,0,,5/6/02,JDOHERTY,GLBA,H,3713.18074,1.485272296,0,6495754.23,441063.5805,6495755.574,444777.0361,442381.429,6495805.215,
2002,1,191,11,7,1,2,0,2,4,0,,5/6/02,JDOHERTY,GLBA,H,3713.18074,1.485272296,0,6495754.23,441063.5805,6495755.574,444777.0361,442624.2041,6495889.658,
2002,1,191,11,8,1,32,0,32,4,0,,5/6/02,JDOHERTY,GLBA,H,3713.18074,1.485272296,1,6495754.23,441063.5805,6495755.574,444777.0361,441410.3286,6495826.325,
2002,1,191,11,1,1,1,0,1,4,0,18,5/6/02,JDOHERTY,GLBA,H,3713.18074,1.485272296,0,6495754.23,441063.5805,6495755.574,444777.0361,441843.1016,6495784.104,20021018
2002,1,191,11,2,1,1,0,1,4,0,18,5/6/02,JDOHERTY,GLBA,H,3713.18074,1.485272296,0,6495754.23,441063.5805,6495755.574,444777.0361,441843.1016,6495900.214,20022018
2002,1,191,11,3,1,1,0,1,4,0,18,5/6/02,JDOHERTY,GLBA,H,3713.18074,1.485272296,0,6495754.23,441063.5805,6495755.574,444777.0361,441959.2114,6495931.88,20023018
2002,1,191,11,4,1,1,0,1,4,0,18,5/6/02,JDOHERTY,GLBA,H,3713.18074,1.485272296,0,6495754.23,441063.5805,6495755.574,444777.0361,442054.2104,6495952.991,20024018
2002,1,191,11,5,1,1,1,2,4,0,18,5/6/02,JDOHERTY,GLBA,H,3713.18074,1.485272296,0,6495754.23,441063.5805,6495755.574,444777.0361,441980.3223,6495815.77,20025018
2002,4,191,8,4,1,1,0,1,4,0,,5/14/200,JDOHERTY,GLBA,H,3713.18074,1.485272296,0,6495754.23,441063.5805,6495755.574,444777.0361,441755.3682,6495858.721,
2002,4,191,8,5,1,1,0,1,4,0,,5/14/200,JDOHERTY,GLBA,H,3713.18074,1.485272296,0,6495754.23,441063.5805,6495755.574,444777.0361,441910.1172,6495796.822,
2002,4,191,8,6,1,1,1,2,4,0,,5/14/200,JDOHERTY,GLBA,H,3713.18074,1.485272296,0,6495754.23,441063.5805,6495755.574,444777.0361,442095.816,6495858.721,
2002,4,191,8,7,1,1,1,2,4,0,,5/14/200,JDOHERTY,GLBA,H,3713.18074,1.485272296,0,6495754.23,441063.5805,6495755.574,444777.0361,442446.5805,6495734.922,
2002,4,191,8,8,1,1,0,1,4,0,,5/14/200,JDOHERTY,GLBA,H,3713.18074,1.485272296,0,6495754.23,441063.5805,6495755.574,444777.0361,442002.9666,6495714.289,
2002,4,191,8,9,1,1,0,1,4,0,,5/14/200,JDOHERTY,GLBA,H,3713.18074,1.485272296,0,6495754.23,441063.5805,6495755.574,444777.0361,442023.5998,6496013.47,
2002,4,191,8,10,1,1,0,1,4,0,,5/14/200,JDOHERTY,GLBA,H,3713.18074,1.485272296,0,6495754.23,441063.5805,6495755.574,444777.0361,442209.2987,6495982.521,
2002,4,191,8,11,1,1,0,1,4,0,,5/14/200,JDOHERTY,GLBA,H,3713.18074,1.485272296,0,6495754.23,441063.5805,6495755.574,444777.0361,442364.0477,6495951.571,
2002,4,191,8,12,1,1,0,1,4,0,,5/14/200,JDOHERTY,GLBA,H,3713.18074,1.485272296,0,6495754.23,441063.5805,6495755.574,444777.0361,442580.6963,6495920.621,
2002,4,191,8,13,1,1,0,1,4,0,,5/14/200,JDOHERTY,GLBA,H,3713.18074,1.485272296,0,6495754.23,441063.5805,6495755.574,444777.0361,442714.8121,6495807.138,
2002,4,191,8,14,1,1,0,1,4,0,,5/14/200,JDOHERTY,GLBA,H,3713.18074,1.485272296,0,6495754.23,441063.5805,6495755.574,444777.0361,442848.9279,6495724.606,
2002,4,191,8,15,1,1,0,1,4,0,,5/14/200,JDOHERTY,GLBA,H,3713.18074,1.485272296,0,6495754.23,441063.5805,6495755.574,444777.0361,443096.5264,6495869.038,
2002,4,191,8,16,1,1,0,1,4,0,,5/14/200,JDOHERTY,GLBA,H,3713.18074,1.485272296,0,6495754.23,441063.5805,6495755.574,444777.0361,441724.4184,6495714.289,
2002,4,191,8,17,1,1,0,1,4,0,,5/14/200,JDOHERTY,GLBA,H,3713.18074,1.485272296,0,6495754.23,441063.5805,6495755.574,444777.0361,442157.7156,6495734.922,
2002,4,191,8,1,1,1,0,1,4,0,89,5/14/200,JDOHERTY,GLBA,H,3713.18074,1.485272296,0,6495754.23,441063.5805,6495755.574,444777.0361,441610.9358,6495920.621,20021089
2002,4,191,8,2,1,1,0,1,4,0,89,5/14/200,JDOHERTY,GLBA,H,3713.18074,1.485272296,0,6495754.23,441063.5805,6495755.574,444777.0361,441590.3026,6495817.455,20022089
2002,4,191,8,3,1,1,0,1,4,0,89,5/14/200,JDOHERTY,GLBA,H,3713.18074,1.485272296,0,6495754.23,441063.5805,6495755.574,444777.0361,441487.1365,6495714.289,20023089
2002,3,191,16,0,1,0,0,0,0,0,,5/8/02,JDOHERTY,GLBA,H,601.14437,0.240457748,0,6496154.934,435447.9832,6496154.32,436048.6121,,,
2002,2,192,6,0,1,0,0,0,4,0,,5/7/02,JDOHERTY,GLBA,H,3354.50078,1.341800312,0,6494154.268,446344.7964,6494154.155,449698.0944,,,
2002,5,192,1,0,1,0,0,0,4,0,,5/18/200,JDOHERTY,GLBA,H,3354.50078,1.341800312,0,6494154.268,446344.7964,6494154.155,449698.0944,,,
2002,1,192,11,0,1,0,0,0,4,0,,5/6/02,JDOHERTY,GLBA,H,4143.22777,1.657291108,0,6494555.905,429393.0771,6494555.548,433535.4863,,,
2002,4,192,8,0,1,0,0,0,3,0,,5/14/200,JDOHERTY,GLBA,H,4143.22777,1.657291108,0,6494555.905,429393.0771,6494555.548,433535.4863,,,
2002,3,192,16,3,1,1,0,1,0,0,,5/8/02,JDOHERTY,GLBA,H,2637.59961,1.055039844,0,6496154.651,441588.8651,6496155.03,444225.6917,442388.2741,6496082.381,
2002,3,192,16,4,1,2,0,2,0,0,,5/8/02,JDOHERTY,GLBA,H,2637.59961,1.055039844,0,6496154.651,441588.8651,6496155.03,444225.6917,442627.0228,6496231.599,
2002,3,192,16,5,1,1,0,1,0,0,,5/8/02,JDOHERTY,GLBA,H,2637.59961,1.055039844,0,6496154.651,441588.8651,6496155.03,444225.6917,442447.9612,6496132.12,
2002,3,192,16,6,1,3,0,3,0,0,,5/8/02,JDOHERTY,GLBA,H,2637.59961,1.055039844,0,6496154.651,441588.8651,6496155.03,444225.6917,442577.2835,6496420.609,
2002,3,192,16,7,1,1,0,1,0,0,,5/8/02,JDOHERTY,GLBA,H,2637.59961,1.055039844,0,6496154.651,441588.8651,6496155.03,444225.6917,442726.5015,6496360.921,
2002,3,192,16,8,1,1,0,1,0,0,,5/8/02,JDOHERTY,GLBA,H,2637.59961,1.055039844,0,6496154.651,441588.8651,6496155.03,444225.6917,442438.0134,6496390.765,
2002,3,192,16,9,1,1,0,1,0,0,,5/8/02,JDOHERTY,GLBA,H,2637.59961,1.055039844,0,6496154.651,441588.8651,6496155.03,444225.6917,442527.5442,6496191.808,
2002,3,192,16,10,1,2,0,2,0,0,,5/8/02,JDOHERTY,GLBA,H,2637.59961,1.055039844,0,6496154.651,441588.8651,6496155.03,444225.6917,442646.9185,6496112.225,
2002,3,192,16,11,1,1,0,1,0,0,,5/8/02,JDOHERTY,GLBA,H,2637.59961,1.055039844,0,6496154.651,441588.8651,6496155.03,444225.6917,442527.5442,6496092.329,
2002,3,192,16,1,1,1,0,1,0,0,72,5/8/02,JDOHERTY,GLBA,H,2637.59961,1.055039844,0,6496154.651,441588.8651,6496155.03,444225.6917,442268.8997,6496251.495,20021072
2002,3,192,16,2,1,1,0,1,0,0,72,5/8/02,JDOHERTY,GLBA,H,2637.59961,1.055039844,0,6496154.651,441588.8651,6496155.03,444225.6917,442318.639,6496380.817,20022072
2002,2,193,6,0,1,0,0,0,0,0,,5/7/02,JDOHERTY,GLBA,H,436.4296,0.17457184,0,6492954.718,436602.136,6492955.068,437039.4114,,,
2002,5,193,1,0,1,0,0,0,0,0,,5/18/200,JDOHERTY,GLBA,H,436.4296,0.17457184,0,6492954.718,436602.136,6492955.068,437039.4114,,,
2002,1,193,11,0,1,0,0,0,0,0,,5/6/02,JDOHERTY,GLBA,H,406.80326,0.162721304,0,6494554.125,436291.8055,6494554.925,436698.8669,,,
2002,4,193,8,0,1,0,0,0,0,0,,5/14/200,JDOHERTY,GLBA,H,406.80326,0.162721304,0,6494554.125,436291.8055,6494554.925,436698.8669,,,
2002,3,193,16,0,1,0,0,0,4,0,,5/8/02,JDOHERTY,GLBA,H,1205.77813,0.482311252,0,6496155.624,446977.7328,6496154.277,448182.7389,,,
2002,2,194,6,0,1,0,0,0,0,0,,5/7/02,JDOHERTY,GLBA,H,2636.82051,1.054728204,0,6491756.387,432786.5907,6491756.45,435423.6972,,,
2002,1,194,11,0,1,0,0,0,4,0,,5/6/02,JDOHERTY,GLBA,H,4652.12394,1.860849576,0,6493354.549,429828.962,6493355.402,434479.6862,,,
2002,4,194,8,0,1,0,0,0,4,0,,5/14/200,JDOHERTY,GLBA,H,4652.12394,1.860849576,0,6493354.549,429828.962,6493355.402,434479.6862,,,
2002,2,195,6,0,1,0,0,0,0,0,,5/7/02,JDOHERTY,GLBA,H,571.6944,0.22867776,0,6491754.284,436233.4982,6491756.137,436804.7738,,,
2002,5,195,1,0,1,0,0,0,0,0,,5/18/200,JDOHERTY,GLBA,H,571.6944,0.22867776,0,6491754.284,436233.4982,6491756.137,436804.7738,,,
2002,1,195,11,0,1,0,0,0,0,0,,5/6/02,JDOHERTY,GLBA,H,482.51733,0.193006932,0,6493355.041,436409.8961,6493354.646,436891.7107,,,
2002,4,195,8,0,1,0,0,0,4,0,,5/14/200,JDOHERTY,GLBA,H,482.51733,0.193006932,0,6493355.041,436409.8961,6493354.646,436891.7107,,,
2002,3,195,16,0,1,0,0,0,2,0,,5/8/02,JDOHERTY,GLBA,H,3993.37003,1.597348012,0,6494954.497,429316.943,6494954.748,433309.7026,,,
2002,2,196,6,1,1,1,0,1,0,0,40,5/7/02,JDOHERTY,GLBA,H,724.13458,0.289653832,0,6491755.002,440420.3107,6491755.156,441144.767,440703.4942,6491840.405,20021040
2002,5,196,1,1,1,1,0,1,0,0,115,5/18/200,JDOHERTY,GLBA,H,724.13458,0.289653832,0,6491755.002,440420.3107,6491755.156,441144.767,440872.61,6491847.927,20021115
2002,1,196,11,1,1,1,0,1,3,0,15,5/6/02,JDOHERTY,GLBA,H,3238.38089,1.295352356,0,6493354.688,442412.6229,6493354.674,445650.3947,442824.7574,6493430.241,20021015
2002,1,196,11,2,1,1,0,1,3,0,15,5/6/02,JDOHERTY,GLBA,H,3238.38089,1.295352356,0,6493354.688,442412.6229,6493354.674,445650.3947,442909.2009,6493440.796,20022015
2002,4,196,8,0,1,0,0,0,4,0,,5/14/200,JDOHERTY,GLBA,H,3238.38089,1.295352356,0,6493354.688,442412.6229,6493354.674,445650.3947,,,
2002,3,196,16,0,1,0,0,0,0,0,,5/8/02,JDOHERTY,GLBA,H,432.11557,0.172846228,0,6494954.924,436071.5868,6494955.291,436503.7964,,,
2002,2,197,6,0,1,0,0,0,0,0,,5/7/02,JDOHERTY,GLBA,H,615.63792,0.246255168,0,6490554.449,433389.7437,6490555.134,434005.8211,,,
2002,5,197,1,0,1,0,0,0,4,0,,5/18/200,JDOHERTY,GLBA,H,615.63792,0.246255168,0,6490554.449,433389.7437,6490555.134,434005.8211,,,
2002,1,197,11,0,1,0,0,0,4,0,,5/6/02,JDOHERTY,GLBA,H,1282.2561,0.51290244,0,6493354.092,446634.3022,6493355.333,447916.7903,,,
2002,4,197,8,0,1,0,0,0,4,0,,5/14/200,JDOHERTY,GLBA,H,1282.2561,0.51290244,0,6493354.092,446634.3022,6493355.333,447916.7903,,,
2002,3,197,16,0,1,0,0,0,0,0,,5/8/02,JDOHERTY,GLBA,H,410.78043,0.164312172,0,6493755.868,436528.8703,6493754.791,436938.8917,,,
2002,2,198,6,0,1,0,0,0,0,0,,5/7/02,JDOHERTY,GLBA,H,417.80966,0.167123864,0,6490556.18,449645.9131,6490556.396,450063.0335,,,
2002,5,198,1,0,1,0,0,0,4,0,,5/18/200,JDOHERTY,GLBA,H,417.80966,0.167123864,0,6490556.18,449645.9131,6490556.396,450063.0335,,,
2002,1,198,11,0,1,0,0,0,0,0,,5/6/02,JDOHERTY,GLBA,H,612.85675,0.2451427,0,6492154.243,430835.3999,6492154.575,431448.3272,,,
2002,4,198,8,0,1,0,0,0,4,0,,5/14/200,JDOHERTY,GLBA,H,612.85675,0.2451427,0,6492154.243,430835.3999,6492154.575,431448.3272,,,
2002,3,198,16,0,1,0,0,0,4,0,,5/8/02,JDOHERTY,GLBA,H,2079.85052,0.831940208,0,6493755.016,446225.903,6493754.769,448304.9771,,,
2002,2,199,6,0,1,0,0,0,0,0,,5/7/02,JDOHERTY,GLBA,H,452.96852,0.181187408,0,6489354.471,433554.6545,6489354.219,434007.8646,,,
2002,5,199,1,0,1,0,0,0,4,0,,5/18/200,JDOHERTY,GLBA,H,452.96852,0.181187408,0,6489354.471,433554.6545,6489354.219,434007.8646,,,
2002,1,199,11,0,1,0,0,0,4,0,,5/6/02,JDOHERTY,GLBA,H,2699.43385,1.07977354,0,6492154.212,432427.8224,6492154.856,435126.745,,,
2002,4,199,8,0,1,0,0,0,4,0,,5/14/200,JDOHERTY,GLBA,H,2699.43385,1.07977354,0,6492154.212,432427.8224,6492154.856,435126.745,,,
2002,3,199,16,0,1,0,0,0,0,0,,5/8/02,JDOHERTY,GLBA,H,400.79195,0.16031678,0,6492555.3,436739.1602,6492554.402,437139.6136,,,
2002,2,200,6,0,1,0,0,0,0,0,,5/7/02,JDOHERTY,GLBA,H,3434.41783,1.373767132,0,6489356.023,447344.3093,6489355.812,450779.3256,,,
2002,5,200,1,0,1,0,0,0,4,0,,5/18/200,JDOHERTY,GLBA,H,3434.41783,1.373767132,0,6489356.023,447344.3093,6489355.812,450779.3256,,,
2002,1,200,11,0,1,0,0,0,0,0,,5/6/02,JDOHERTY,GLBA,H,463.84637,0.185538548,0,6492154.655,436608.5419,6492154.583,437072.0839,,,
2002,4,200,8,0,1,0,0,0,4,0,,5/14/200,JDOHERTY,GLBA,H,463.84637,0.185538548,0,6492154.655,436608.5419,6492154.583,437072.0839,,,
2002,3,200,16,0,1,0,0,0,0,0,,5/8/02,JDOHERTY,GLBA,H,520.61978,0.208247912,0,6492554.5,440327.7855,6492555.859,440848.4926,,,
2002,2,201,6,0,1,0,0,0,0,0,,5/7/02,JDOHERTY,GLBA,H,1537.25814,0.614903256,0,6488156.328,431459.7166,6488155.687,432996.4699,,,
2002,5,201,1,0,1,0,0,0,3,0,,5/18/200,JDOHERTY,GLBA,H,1537.25814,0.614903256,0,6488156.328,431459.7166,6488155.687,432996.4699,,,
2002,1,201,11,2,1,1,0,1,0,0,,5/6/02,JDOHERTY,GLBA,H,917.00836,0.366803344,0,6492154.406,440153.9098,6492155.305,441071.2789,440850.8904,6492237.476,
2002,1,201,11,1,1,2,0,2,0,0,13,5/6/02,JDOHERTY,GLBA,H,917.00836,0.366803344,0,6492154.406,440153.9098,6492155.305,441071.2789,440523.6718,6492237.476,20021013
2002,4,201,8,0,1,0,0,0,4,0,,5/14/200,JDOHERTY,GLBA,H,917.00836,0.366803344,0,6492154.406,440153.9098,6492155.305,441071.2789,,,
2002,3,201,16,0,1,0,0,0,0,0,,5/8/02,JDOHERTY,GLBA,H,448.88576,0.179554304,0,6492554.269,446899.6973,6492555.615,447348.6246,,,
2002,2,202,6,0,1,0,0,0,0,0,,5/7/02,JDOHERTY,GLBA,H,724.14759,0.289659036,0,6488156.559,433598.3692,6488155.469,434322.5493,,,
2002,5,202,1,0,1,0,0,0,0,0,,5/18/200,JDOHERTY,GLBA,H,724.14759,0.289659036,0,6488156.559,433598.3692,6488155.469,434322.5493,,,
2002,3,202,16,0,1,0,0,0,0,0,,5/8/02,JDOHERTY,GLBA,H,3777.54136,1.511016544,0,6491354.512,432950.3955,6491356.481,436727.5025,,,
2002,1,202,11,1,1,1,0,1,1,0,,5/6/02,JDOHERTY,GLBA,H,4195.88289,1.678353156,0,6492156.239,442251.4305,6492155.848,446447.2632,443468.6391,6492300.809,
2002,1,202,11,2,1,3,0,3,1,0,,5/6/02,JDOHERTY,GLBA,H,4195.88289,1.678353156,0,6492156.239,442251.4305,6492155.848,446447.2632,443764.1914,6492195.255,
2002,4,202,8,0,1,0,0,0,4,0,,5/14/200,JDOHERTY,GLBA,H,4195.88289,1.678353156,0,6492156.239,442251.4305,6492155.848,446447.2632,,,
2002,2,203,6,0,1,0,0,0,0,0,,5/7/02,JDOHERTY,GLBA,H,1716.36421,0.686545684,0,6488154.877,448626.864,6488154.985,450342.9547,,,
2002,5,203,1,0,1,0,0,0,0,0,,5/18/200,JDOHERTY,GLBA,H,1716.36421,0.686545684,0,6488154.877,448626.864,6488154.985,450342.9547,,,
2002,3,203,16,0,1,0,0,0,4,0,,5/8/02,JDOHERTY,GLBA,H,642.58102,0.257032408,0,6490156.488,431925.5826,6490156.491,432567.9185,,,
2002,1,203,11,0,1,0,0,0,4,0,,5/6/02,JDOHERTY,GLBA,H,1106.5285,0.4426114,0,6490955.409,433278.2274,6490955.244,434384.118,,,
2002,4,203,8,0,1,0,0,0,4,0,,5/14/200,JDOHERTY,GLBA,H,1106.5285,0.4426114,0,6490955.409,433278.2274,6490955.244,434384.118,,,
2002,2,204,6,0,1,0,0,0,0,0,,5/7/02,JDOHERTY,GLBA,H,791.01979,0.316407916,0,6486955.439,428249.5326,6486955.856,429041.0097,,,
2002,5,204,1,0,1,0,0,0,4,0,,5/18/200,JDOHERTY,GLBA,H,791.01979,0.316407916,0,6486955.439,428249.5326,6486955.856,429041.0097,,,
2002,3,204,16,0,1,0,0,0,4,0,,5/8/02,JDOHERTY,GLBA,H,408.11084,0.163244336,0,6490156.115,433565.3678,6490154.778,433972.8632,,,
2002,1,204,11,1,1,1,0,1,2,0,14,5/6/02,JDOHERTY,GLBA,H,3594.8288,1.43793152,0,6490956.043,440234.4918,6490954.695,443828.3415,440935.3339,6491044.712,20021014
2002,4,204,8,1,1,1,0,1,4,0,,5/14/200,JDOHERTY,GLBA,H,3594.8288,1.43793152,0,6490956.043,440234.4918,6490954.695,443828.3415,441033.2061,6491154.351,
2002,4,204,8,2,1,1,0,1,4,0,,5/14/200,JDOHERTY,GLBA,H,3594.8288,1.43793152,0,6490956.043,440234.4918,6490954.695,443828.3415,441177.6385,6490927.386,
2002,4,204,8,3,1,29,4,33,4,0,,5/14/200,JDOHERTY,GLBA,H,3594.8288,1.43793152,1,6490956.043,440234.4918,6490954.695,443828.3415,440589.5922,6491051.185,
2002,2,205,6,0,1,0,0,0,0,0,,5/7/02,JDOHERTY,GLBA,H,748.90427,0.299561708,0,6486955.761,429766.4342,6486955.387,430515.1548,,,
2002,5,205,1,0,1,0,0,0,4,0,,5/18/200,JDOHERTY,GLBA,H,748.90427,0.299561708,0,6486955.761,429766.4342,6486955.387,430515.1548,,,
2002,3,205,16,0,1,0,0,0,4,0,,5/8/02,JDOHERTY,GLBA,H,2032.68891,0.813075564,0,6488954.904,431011.7025,6488954.842,433044.1303,,,
2002,1,205,11,0,1,0,0,0,3,0,,5/6/02,JDOHERTY,GLBA,H,387.64645,0.15505858,0,6490954.901,444332.7382,6490954.961,444720.7329,,,
2002,4,205,8,0,1,0,0,0,4,0,,5/14/200,JDOHERTY,GLBA,H,387.64645,0.15505858,0,6490954.901,444332.7382,6490954.961,444720.7329,,,
2002,2,206,6,0,1,0,0,0,0,0,,5/7/02,JDOHERTY,GLBA,H,666.82471,0.266729884,0,6486954.625,440225.7375,6486955.628,440892.8369,,,
2002,5,206,1,0,1,0,0,0,0,0,,5/18/200,JDOHERTY,GLBA,H,666.82471,0.266729884,0,6486954.625,440225.7375,6486955.628,440892.8369,,,
2002,3,206,16,0,1,0,0,0,3,0,,5/8/02,JDOHERTY,GLBA,H,471.41878,0.188567512,0,6488955.71,433537.2017,6488955.146,434008.8934,,,
2002,1,206,11,0,1,0,0,0,4,0,,5/6/02,JDOHERTY,GLBA,H,1290.1312,0.51605248,0,6490956.67,445126.2084,6490955.471,446416.2566,,,
2002,4,206,8,0,1,0,0,0,4,0,,5/14/200,JDOHERTY,GLBA,H,1290.1312,0.51605248,0,6490956.67,445126.2084,6490955.471,446416.2566,,,
2002,2,207,6,0,1,0,0,0,0,0,,5/7/02,JDOHERTY,GLBA,H,399.99904,0.159999616,0,6485755.183,436027.782,6485756.103,436427.021,,,
2002,5,207,1,0,1,0,0,0,4,0,,5/18/200,JDOHERTY,GLBA,H,399.99904,0.159999616,0,6485755.183,436027.782,6485756.103,436427.021,,,
2002,3,207,16,1,1,1,0,1,4,0,,5/8/02,JDOHERTY,GLBA,H,2553.55784,1.021423136,0,6488954.375,441645.0891,6488956.079,444198.4829,443243.7905,6489168.615,
2002,3,207,16,2,1,1,1,2,4,0,,5/8/02,JDOHERTY,GLBA,H,2553.55784,1.021423136,0,6488954.375,441645.0891,6488956.079,444198.4829,443562.1222,6488959.71,
2002,1,207,11,0,1,0,0,0,0,0,,5/6/02,JDOHERTY,GLBA,H,614.71747,0.245886988,0,6490955.128,446985.6218,6490956.126,447599.6207,,,
2002,4,207,8,0,1,0,0,0,1,0,,5/14/200,JDOHERTY,GLBA,H,614.71747,0.245886988,0,6490955.128,446985.6218,6490956.126,447599.6207,,,
2002,2,208,6,0,1,0,0,0,0,0,,5/7/02,JDOHERTY,GLBA,H,400.88756,0.160355024,0,6485756.178,439707.2056,6485755.588,440108.3489,,,
2002,5,208,1,0,1,0,0,0,4,0,,5/18/200,JDOHERTY,GLBA,H,400.88756,0.160355024,0,6485756.178,439707.2056,6485755.588,440108.3489,,,
2002,3,208,16,0,1,0,0,0,2,0,,5/8/02,JDOHERTY,GLBA,H,2957.14766,1.182859064,0,6488955.86,445132.0807,6488956.317,448089.0869,,,
2002,1,208,11,0,1,0,0,0,0,0,,5/6/02,JDOHERTY,GLBA,H,877.63509,0.351054036,0,6490955.607,448055.4939,6490955.173,448933.2944,,,
2002,4,208,8,0,1,0,0,0,4,0,,5/14/200,JDOHERTY,GLBA,H,877.63509,0.351054036,0,6490955.607,448055.4939,6490955.173,448933.2944,,,
2002,2,209,6,0,1,0,0,0,0,0,,5/7/02,JDOHERTY,GLBA,H,649.60936,0.259843744,0,6484555.532,435727.3724,6484556.07,436376.4413,,,
2002,5,209,1,0,1,0,0,0,0,0,,5/18/200,JDOHERTY,GLBA,H,649.60936,0.259843744,0,6484555.532,435727.3724,6484556.07,436376.4413,,,
2002,3,209,16,1,1,1,0,1,0,0,68,5/8/02,JDOHERTY,GLBA,H,2051.27343,0.820509372,0,6488955.538,448569.449,6488956.932,450620.9756,449680.0593,6489059.188,20021068
2002,1,209,11,0,1,0,0,0,2,0,,5/6/02,JDOHERTY,GLBA,H,2214.44796,0.885779184,0,6489755.523,447862.9551,6489756.302,450078.0364,,,
2002,4,209,8,0,1,0,0,0,3,0,,5/14/200,JDOHERTY,GLBA,H,2214.44796,0.885779184,0,6489755.523,447862.9551,6489756.302,450078.0364,,,
2002,2,210,6,0,1,0,0,0,0,0,,5/7/02,JDOHERTY,GLBA,H,698.18381,0.279273524,0,6484555.592,448113.259,6484555.691,448810.8252,,,
2002,5,210,1,0,1,0,0,0,0,0,,5/18/200,JDOHERTY,GLBA,H,698.18381,0.279273524,0,6484555.592,448113.259,6484555.691,448810.8252,,,
2002,3,210,16,0,1,0,0,0,4,0,,5/8/02,JDOHERTY,GLBA,H,3003.95337,1.201581348,0,6487755.637,431765.3243,6487754.525,434768.2416,,,
2002,1,210,11,0,1,0,0,0,0,0,,5/6/02,JDOHERTY,GLBA,H,1417.39226,0.566956904,0,6488554.825,431491.9377,6488554.385,432909.143,,,
2002,4,210,8,0,1,0,0,0,4,0,,5/14/200,JDOHERTY,GLBA,H,1417.39226,0.566956904,0,6488554.825,431491.9377,6488554.385,432909.143,,,
2002,2,211,6,0,1,0,0,0,0,0,,5/7/02,JDOHERTY,GLBA,H,1363.91492,0.545565968,0,6483355.557,435673.6625,6483355.678,437037.2988,,,
2002,5,211,1,0,1,0,0,0,1,0,,5/18/200,JDOHERTY,GLBA,H,1363.91492,0.545565968,0,6483355.557,435673.6625,6483355.678,437037.2988,,,
2002,3,211,16,0,1,0,0,0,0,0,,5/8/02,JDOHERTY,GLBA,H,1884.16243,0.753664972,0,6487755.061,448545.8947,6487756.715,450430.1184,,,
2002,1,211,11,0,1,0,0,0,0,0,,5/6/02,JDOHERTY,GLBA,H,760.2373,0.30409492,0,6488555.92,433471.1951,6488554.185,434232.1768,,,
2002,4,211,8,0,1,0,0,0,4,0,,5/14/200,JDOHERTY,GLBA,H,760.2373,0.30409492,0,6488555.92,433471.1951,6488554.185,434232.1768,,,
2002,2,212,6,0,1,0,0,0,0,0,,5/7/02,JDOHERTY,GLBA,H,3618.05719,1.447222876,0,6483356.121,439844.217,6483356.074,443461.6033,,,
2002,5,212,1,0,1,0,0,0,2,2,,5/18/200,JDOHERTY,GLBA,H,3618.05719,1.447222876,0,6483356.121,439844.217,6483356.074,443461.6033,,,
2002,3,212,16,0,1,0,0,0,4,0,,5/8/02,JDOHERTY,GLBA,H,4871.59236,1.948636944,0,6486555.882,428276.2,6486555.017,433147.7499,,,
2002,1,212,11,2,1,2,0,2,0,0,,5/6/02,JDOHERTY,GLBA,H,3048.47101,1.219388404,0,6488555.814,441117.9258,6488555.659,444165.593,443078.0879,6488743.626,
2002,1,212,11,3,1,1,0,1,0,0,,5/6/02,JDOHERTY,GLBA,H,3048.47101,1.219388404,0,6488555.814,441117.9258,6488555.659,444165.593,443595.3044,6488616.961,
2002,1,212,11,1,1,1,0,1,0,0,12,5/6/02,JDOHERTY,GLBA,H,3048.47101,1.219388404,0,6488555.814,441117.9258,6488555.659,444165.593,442634.7595,6488638.072,20021012
2002,4,212,8,1,1,2,0,2,4,0,84,5/14/200,JDOHERTY,GLBA,H,3048.47101,1.219388404,0,6488555.814,441117.9258,6488555.659,444165.593,441466.5033,6488719.633,20021084
2002,4,212,8,2,1,1,0,1,4,0,84,5/14/200,JDOHERTY,GLBA,H,3048.47101,1.219388404,0,6488555.814,441117.9258,6488555.659,444165.593,441373.6539,6488616.467,20022084
2002,4,212,8,3,1,1,1,2,4,0,,5/14/200,JDOHERTY,GLBA,H,3048.47101,1.219388404,0,6488555.814,441117.9258,6488555.659,444165.593,441724.4184,6488709.317,
2002,4,212,8,4,1,1,1,2,4,0,,5/14/200,JDOHERTY,GLBA,H,3048.47101,1.219388404,0,6488555.814,441117.9258,6488555.659,444165.593,441910.1172,6488544.251,
2002,4,212,8,5,1,1,1,2,4,0,,5/14/200,JDOHERTY,GLBA,H,3048.47101,1.219388404,0,6488555.814,441117.9258,6488555.659,444165.593,442054.5496,6488719.633,
2002,4,212,8,6,1,1,0,1,4,0,,5/14/200,JDOHERTY,GLBA,H,3048.47101,1.219388404,0,6488555.814,441117.9258,6488555.659,444165.593,442281.5149,6488626.784,
2002,4,212,8,7,1,1,1,2,4,0,,5/14/200,JDOHERTY,GLBA,H,3048.47101,1.219388404,0,6488555.814,441117.9258,6488555.659,444165.593,442456.8971,6488750.583,
2002,2,213,6,0,1,0,0,0,0,0,,5/7/02,JDOHERTY,GLBA,H,961.67602,0.384670408,0,6482156.96,440832.0359,6482157.413,441793.5423,,,
2002,5,213,1,0,1,0,0,0,3,0,,5/18/200,JDOHERTY,GLBA,H,961.67602,0.384670408,0,6482156.96,440832.0359,6482157.413,441793.5423,,,
2002,3,213,16,0,1,0,0,0,4,0,,5/8/02,JDOHERTY,GLBA,H,485.55248,0.194220992,0,6486556.115,439948.7095,6486556.118,440434.2662,,,
2002,1,213,11,0,1,0,0,0,0,0,,5/6/02,JDOHERTY,GLBA,H,1361.58741,0.544634964,0,6488556.615,448844.69,6488555.756,450205.3744,,,
2002,4,213,8,0,1,0,0,0,3,0,,5/14/200,JDOHERTY,GLBA,H,1361.58741,0.544634964,0,6488556.615,448844.69,6488555.756,450205.3744,,,
2002,2,214,6,0,1,0,0,0,0,0,,5/7/02,JDOHERTY,GLBA,H,1058.91998,0.423567992,0,6480956.755,437444.1704,6480956.723,438502.2734,,,
2002,5,214,1,0,1,0,0,0,4,0,,5/18/200,JDOHERTY,GLBA,H,1058.91998,0.423567992,0,6480956.755,437444.1704,6480956.723,438502.2734,,,
2002,3,214,16,0,1,0,0,0,0,0,,5/8/02,JDOHERTY,GLBA,H,877.81595,0.35112638,0,6486555.639,449871.1224,6486555.616,450749.9041,,,
2002,1,214,11,0,1,0,0,0,0,0,,5/6/02,JDOHERTY,GLBA,H,3341.87034,1.336748136,0,6487356.291,430411.5787,6487355.83,433752.7556,,,
2002,4,214,8,1,1,1,0,1,2,0,95,5/14/200,JDOHERTY,GLBA,H,3341.87034,1.336748136,0,6487356.291,430411.5787,6487355.83,433752.7556,433563.9865,6487461.008,20021095
2002,2,215,6,0,1,0,0,0,0,0,,5/7/02,JDOHERTY,GLBA,H,1970.53101,0.788212404,0,6480955.585,440013.5356,6480957.492,441983.8363,,,
2002,5,215,1,0,1,0,0,0,3,0,,5/18/200,JDOHERTY,GLBA,H,1970.53101,0.788212404,0,6480955.585,440013.5356,6480957.492,441983.8363,,,
2002,1,215,11,0,1,0,0,0,0,0,,5/6/02,JDOHERTY,GLBA,H,893.07362,0.357229448,0,6486154.893,435422.4239,6486156.972,436315.0385,,,
2002,4,215,8,0,1,0,0,0,1,0,,5/14/200,JDOHERTY,GLBA,H,893.07362,0.357229448,0,6486154.893,435422.4239,6486156.972,436315.0385,,,
2002,2,216,6,0,1,0,0,0,0,0,,5/7/02,JDOHERTY,GLBA,H,694.1393,0.27765572,0,6480956.528,445411.7803,6480956.203,446106.1074,,,
2002,5,216,1,0,1,0,0,0,4,0,,5/18/200,JDOHERTY,GLBA,H,694.1393,0.27765572,0,6480956.528,445411.7803,6480956.203,446106.1074,,,
2002,3,216,16,0,1,0,0,0,0,0,,5/8/02,JDOHERTY,GLBA,H,409.29199,0.163716796,0,6485356.225,436135.8931,6485357,436544.8847,,,
2002,1,216,11,0,1,0,0,0,0,0,,5/6/02,JDOHERTY,GLBA,H,445.44352,0.178177408,0,6486154.615,439746.3638,6486157.059,440192.1885,,,
2002,4,216,8,0,1,0,0,0,0,0,,5/14/200,JDOHERTY,GLBA,H,445.44352,0.178177408,0,6486154.615,439746.3638,6486157.059,440192.1885,,,
2002,2,217,6,0,1,0,0,0,0,0,,5/7/02,JDOHERTY,GLBA,H,1365.27402,0.546109608,0,6479756.296,436841.325,6479756.816,438207.1766,,,
2002,5,217,1,1,1,1,0,1,3,2,108,5/18/200,JDOHERTY,GLBA,H,1365.27402,0.546109608,0,6479756.296,436841.325,6479756.816,438207.1766,437862.6656,6479850.345,20021108
2002,3,217,16,0,1,0,0,0,4,0,,5/8/02,JDOHERTY,GLBA,H,406.84225,0.1627369,0,6485355.631,439684.5228,6485356.806,440091.5627,,,
2002,1,217,11,1,1,1,0,1,1,0,10,5/6/02,JDOHERTY,GLBA,H,7222.44147,2.888976588,0,6486155.513,441896.6287,6486155.196,449118.2196,442339.2072,6486231.432,20021010
2002,1,217,11,2,1,1,0,1,1,0,,5/6/02,JDOHERTY,GLBA,H,7222.44147,2.888976588,0,6486155.513,441896.6287,6486155.196,449118.2196,444640.2928,6486210.321,
2002,4,217,8,1,1,1,0,1,2,0,81,5/14/200,JDOHERTY,GLBA,H,7222.44147,2.888976588,0,6486155.513,441896.6287,6486155.196,449118.2196,444148.8197,6486233.332,20021081
2002,2,218,6,0,1,0,0,0,0,0,,5/7/02,JDOHERTY,GLBA,H,1316.75849,0.526703396,0,6479755.92,442540.0007,6479757.277,443856.1809,,,
2002,5,218,1,0,1,0,0,0,0,0,,5/18/200,JDOHERTY,GLBA,H,1316.75849,0.526703396,0,6479755.92,442540.0007,6479757.277,443856.1809,,,
2002,3,218,16,0,1,0,0,0,0,0,,5/8/02,JDOHERTY,GLBA,H,663.49385,0.26539754,0,6485355.513,448252.0746,6485356.067,448916.4786,,,
2002,1,218,11,0,1,0,0,0,0,0,,5/6/02,JDOHERTY,GLBA,H,567.29895,0.22691958,0,6486154.894,450005.8323,6486156.971,450572.9982,,,
2002,4,218,8,0,1,0,0,0,0,0,,5/14/200,JDOHERTY,GLBA,H,567.29895,0.22691958,0,6486154.894,450005.8323,6486156.971,450572.9982,,,
2002,2,219,6,0,1,0,0,0,0,0,,5/7/02,JDOHERTY,GLBA,H,1515.64994,0.606259976,0,6478557.268,436613.7734,6478557.201,438129.8952,,,
2002,5,219,1,0,1,0,0,0,2,2,,5/18/200,JDOHERTY,GLBA,H,1515.64994,0.606259976,0,6478557.268,436613.7734,6478557.201,438129.8952,,,
2002,3,219,16,0,1,0,0,0,0,0,,5/8/02,JDOHERTY,GLBA,H,712.86569,0.285146276,0,6484156.347,435622.6748,6484155.825,436335.9285,,,
2002,1,219,11,0,1,0,0,0,0,0,,5/6/02,JDOHERTY,GLBA,H,564.26291,0.225705164,0,6484955.049,435925.3243,6484956.989,436489.8248,,,
2002,4,219,8,0,1,0,0,0,0,0,,5/14/200,JDOHERTY,GLBA,H,564.26291,0.225705164,0,6484955.049,435925.3243,6484956.989,436489.8248,,,
2002,2,220,6,0,1,0,0,0,0,0,,5/7/02,JDOHERTY,GLBA,H,987.66557,0.395066228,0,6478555.844,444949.248,6478556.949,445937.8833,,,
2002,5,220,1,0,1,0,0,0,1,2,,5/18/200,JDOHERTY,GLBA,H,987.66557,0.395066228,0,6478555.844,444949.248,6478556.949,445937.8833,,,
2002,3,220,16,0,1,0,0,0,1,0,,5/8/02,JDOHERTY,GLBA,H,5046.26635,2.01850654,0,6484155.35,440132.4544,6484155.715,445178.4273,,,
2002,1,220,11,0,1,0,0,0,3,0,,5/6/02,JDOHERTY,GLBA,H,7251.39245,2.90055698,0,6484955.478,439877.5183,6484956.649,447128.6681,,,
2002,4,220,8,0,1,0,0,0,1,0,,5/14/200,JDOHERTY,GLBA,H,7251.39245,2.90055698,0,6484955.478,439877.5183,6484956.649,447128.6681,,,
2002,2,221,6,0,1,0,0,0,0,0,,5/7/02,JDOHERTY,GLBA,H,1233.00708,0.493202832,0,6478556.935,446344.6154,6478556.977,447577.4557,,,
2002,5,221,1,0,1,0,0,0,0,2,,5/18/200,JDOHERTY,GLBA,H,1233.00708,0.493202832,0,6478556.935,446344.6154,6478556.977,447577.4557,,,
2002,3,221,16,0,1,0,0,0,0,0,,5/8/02,JDOHERTY,GLBA,H,2630.55989,1.052223956,0,6482956.23,439537.7263,6482955.505,442167.946,,,
2002,1,221,11,0,1,0,0,0,4,0,,5/6/02,JDOHERTY,GLBA,H,641.03246,0.256412984,0,6484956.349,448122.454,6484955.345,448762.6204,,,
2002,2,222,6,0,1,0,0,0,0,0,,5/7/02,JDOHERTY,GLBA,H,1457.75124,0.583100496,0,6477357.071,446007.0096,6477355.864,447464.0795,,,
2002,5,222,1,0,1,0,0,0,0,0,,5/18/200,JDOHERTY,GLBA,H,1457.75124,0.583100496,0,6477357.071,446007.0096,6477355.864,447464.0795,,,
2002,3,222,16,0,1,0,0,0,0,0,,5/8/02,JDOHERTY,GLBA,H,655.03593,0.262014372,0,6482955.072,442957.1915,6482956.74,443611.3567,,,
2002,1,222,11,0,1,0,0,0,0,0,,5/6/02,JDOHERTY,GLBA,H,815.47116,0.326188464,0,6483757.087,435635.5497,6483756.767,436450.9226,,,
2002,4,222,8,0,1,0,0,0,2,0,,5/14/200,JDOHERTY,GLBA,H,815.47116,0.326188464,0,6483757.087,435635.5497,6483756.767,436450.9226,,,
2002,2,223,6,0,1,0,0,0,0,0,,5/7/02,JDOHERTY,GLBA,H,436.77199,0.174708796,0,6476156.28,437965.4683,6476156.84,438401.6982,,,
2002,5,223,1,0,1,0,0,0,3,2,,5/18/200,JDOHERTY,GLBA,H,436.77199,0.174708796,0,6476156.28,437965.4683,6476156.84,438401.6982,,,
2002,3,223,16,1,1,1,0,1,0,0,79,5/8/02,JDOHERTY,GLBA,H,1992.22172,0.796888688,0,6482954.971,444123.5617,6482954.918,446115.1134,445611.3824,6483040.73,20021079
2002,1,223,11,1,1,1,0,1,0,0,9,5/6/02,JDOHERTY,GLBA,H,3411.98006,1.364792024,0,6483756.541,439996.1364,6483755.891,443407.1223,441114.7763,6483835.347,20021009
2002,4,223,8,1,1,1,0,1,1,0,80,5/14/200,JDOHERTY,GLBA,H,3411.98006,1.364792024,0,6483756.541,439996.1364,6483755.891,443407.1223,440568.959,6483829.564,20021080
2002,4,223,8,2,1,1,0,1,1,0,,5/14/200,JDOHERTY,GLBA,H,3411.98006,1.364792024,0,6483756.541,439996.1364,6483755.891,443407.1223,443003.677,6483839.881,
2002,2,224,6,0,1,0,0,0,0,0,,5/7/02,JDOHERTY,GLBA,H,1191.48063,0.476592252,0,6476156.158,446016.7842,6476156.663,447208.5214,,,
2002,5,224,1,0,1,0,0,0,0,0,,5/18/200,JDOHERTY,GLBA,H,1191.48063,0.476592252,0,6476156.158,446016.7842,6476156.663,447208.5214,,,
2002,3,224,16,0,1,0,0,0,0,0,,5/8/02,JDOHERTY,GLBA,H,1362.94425,0.5451777,0,6482956.397,447371.8645,6482956.892,448734.5293,,,
2002,1,224,11,0,1,0,0,0,0,0,,5/6/02,JDOHERTY,GLBA,H,726.77122,0.290708488,0,6483756.745,448033.6817,6483756.437,448761.5098,,,
2002,4,224,8,0,1,0,0,0,0,0,,5/14/200,JDOHERTY,GLBA,H,726.77122,0.290708488,0,6483756.745,448033.6817,6483756.437,448761.5098,,,
2002,2,225,6,0,1,0,0,0,0,0,,5/7/02,JDOHERTY,GLBA,H,411.84731,0.164738924,0,6474955.937,438288.3886,6474956.912,438700.4072,,,
2002,5,225,1,1,1,1,0,1,0,0,107,5/18/200,JDOHERTY,GLBA,H,411.84731,0.164738924,0,6474955.937,438288.3886,6474956.912,438700.4072,438594.054,6475040.061,20021107
2002,3,225,16,0,1,0,0,0,0,0,,5/8/02,JDOHERTY,GLBA,H,815.75405,0.32630162,0,6481756.138,441073.921,6481756.952,441889.6859,,,
2002,1,225,11,0,1,0,0,0,0,0,,5/6/02,JDOHERTY,GLBA,H,1279.24824,0.511699296,0,6482557.32,444944.1477,6482556.262,446223.3617,,,
2002,4,225,8,0,1,0,0,0,2,0,,5/14/200,JDOHERTY,GLBA,H,1279.24824,0.511699296,0,6482557.32,444944.1477,6482556.262,446223.3617,,,
2002,2,226,6,0,1,0,0,0,0,0,,5/7/02,JDOHERTY,GLBA,H,1338.22077,0.535288308,0,6474957.581,446126.9246,6474956.166,447465.0875,,,
2002,5,226,1,0,1,0,0,0,0,0,,5/18/200,JDOHERTY,GLBA,H,1338.22077,0.535288308,0,6474957.581,446126.9246,6474956.166,447465.0875,,,
2002,3,226,16,0,1,0,0,0,0,0,,5/8/02,JDOHERTY,GLBA,H,1057.8233,0.42312932,0,6481756.024,445042.7574,6481756.199,446099.6023,,,
2002,1,226,11,0,1,0,0,0,0,0,,5/6/02,JDOHERTY,GLBA,H,656.44171,0.262576684,0,6482556.777,446865.8936,6482555.361,447522.005,,,
2002,4,226,8,0,1,0,0,0,0,0,,5/14/200,JDOHERTY,GLBA,H,656.44171,0.262576684,0,6482556.777,446865.8936,6482555.361,447522.005,,,
2002,2,227,6,1,1,1,1,2,0,0,,5/7/02,JDOHERTY,GLBA,H,1050.42043,0.420168172,0,6473757.417,438024.0434,6473757.703,439074.3424,438383.8094,6473954.885,
2002,2,227,6,2,1,48,38,86,0,0,,5/7/02,JDOHERTY,GLBA,H,1050.42043,0.420168172,1,6473757.417,438024.0434,6473757.703,439074.3424,438923.0654,6473835.05,
2002,5,227,1,1,1,1,0,1,0,0,,5/18/200,JDOHERTY,GLBA,H,1050.42043,0.420168172,0,6473757.417,438024.0434,6473757.703,439074.3424,438242.425,6473858.587,
2002,5,227,1,2,1,1,0,1,0,0,,5/18/200,JDOHERTY,GLBA,H,1050.42043,0.420168172,0,6473757.417,438024.0434,6473757.703,439074.3424,438354.9463,6473957.043,
2002,5,227,1,3,1,1,1,2,0,0,,5/18/200,JDOHERTY,GLBA,H,1050.42043,0.420168172,0,6473757.417,438024.0434,6473757.703,439074.3424,438509.663,6473971.108,
2002,5,227,1,4,1,1,0,1,0,0,,5/18/200,JDOHERTY,GLBA,H,1050.42043,0.420168172,0,6473757.417,438024.0434,6473757.703,439074.3424,438875.3572,6473928.913,
2002,5,227,1,5,1,1,0,1,0,0,,5/18/200,JDOHERTY,GLBA,H,1050.42043,0.420168172,0,6473757.417,438024.0434,6473757.703,439074.3424,439044.1391,6473900.783,
2002,3,227,16,0,1,0,0,0,0,0,,5/8/02,JDOHERTY,GLBA,H,1095.79234,0.438316936,0,6480555.749,437334.6755,6480556.962,438429.8659,,,
2002,1,227,11,0,1,0,0,0,0,0,,5/6/02,JDOHERTY,GLBA,H,1040.59493,0.416237972,0,6482555.494,448350.1844,6482556.772,449390.2758,,,
2002,4,227,8,0,1,0,0,0,3,0,,5/14/200,JDOHERTY,GLBA,H,1040.59493,0.416237972,0,6482555.494,448350.1844,6482556.772,449390.2758,,,
2002,2,228,6,0,1,0,0,0,0,0,,5/7/02,JDOHERTY,GLBA,H,767.66099,0.307064396,0,6473757.38,446220.5595,6473756.232,446988.2378,,,
2002,5,228,1,0,1,0,0,0,1,1,,5/18/200,JDOHERTY,GLBA,H,767.66099,0.307064396,0,6473757.38,446220.5595,6473756.232,446988.2378,,,
2002,3,228,16,0,1,0,0,0,0,0,,5/8/02,JDOHERTY,GLBA,H,1781.62409,0.712649636,0,6479355.414,436495.3188,6479356.68,438276.7614,,,
2002,1,228,11,0,1,0,0,0,0,0,,5/6/02,JDOHERTY,GLBA,H,1104.51579,0.441806316,0,6481356.971,444780.4599,6481356.417,445885.0502,,,
2002,4,228,8,0,1,0,0,0,2,0,,5/14/200,JDOHERTY,GLBA,H,1104.51579,0.441806316,0,6481356.971,444780.4599,6481356.417,445885.0502,,,
2002,2,229,6,1,1,2,0,2,0,0,30,5/7/02,JDOHERTY,GLBA,H,745.88598,0.298354392,0,6472556.869,438360.8469,6472556.375,439107.3794,438647.4456,6472672.654,20021030
2002,2,229,6,2,1,1,1,2,0,0,,5/7/02,JDOHERTY,GLBA,H,745.88598,0.298354392,0,6472556.869,438360.8469,6472556.375,439107.3794,439090.8339,6472684.638,
2002,5,229,1,0,1,0,0,0,0,0,,5/18/200,JDOHERTY,GLBA,H,745.88598,0.298354392,0,6472556.869,438360.8469,6472556.375,439107.3794,,,
2002,3,229,16,0,1,0,0,0,0,0,,5/8/02,JDOHERTY,GLBA,H,1706.94636,0.682778544,0,6479356.992,443041.9983,6479356.719,444748.3997,,,
2002,1,229,11,0,1,0,0,0,0,0,,5/6/02,JDOHERTY,GLBA,H,1023.20513,0.409282052,0,6480156.979,437317.6035,6480155.609,438340.8846,,,
2002,4,229,8,0,1,0,0,0,4,0,,5/14/200,JDOHERTY,GLBA,H,1023.20513,0.409282052,0,6480156.979,437317.6035,6480155.609,438340.8846,,,
2002,2,230,6,0,1,0,0,0,0,0,,5/7/02,JDOHERTY,GLBA,H,597.99519,0.239198076,0,6472557.3,446034.5748,6472556.572,446631.9518,,,
2002,5,230,1,0,1,0,0,0,0,2,,5/18/200,JDOHERTY,GLBA,H,597.99519,0.239198076,0,6472557.3,446034.5748,6472556.572,446631.9518,,,
2002,1,230,11,0,1,0,0,0,0,0,,5/6/02,JDOHERTY,GLBA,H,1631.3225,0.652529,0,6480156.642,442172.3611,6480157.06,443803.5425,,,
2002,4,230,8,0,1,0,0,0,0,0,,5/14/200,JDOHERTY,GLBA,H,1631.3225,0.652529,0,6480156.642,442172.3611,6480157.06,443803.5425,,,
2002,2,231,6,1,1,1,0,1,0,0,29,5/7/02,JDOHERTY,GLBA,H,583.12474,0.233249896,0,6471357.315,439234.0738,6471357.635,439817.0601,439833.8088,6471486.291,20021029
2002,2,231,6,2,1,2,0,2,0,0,29,5/7/02,JDOHERTY,GLBA,H,583.12474,0.233249896,0,6471357.315,439234.0738,6471357.635,439817.0601,439713.9742,6471366.456,20022029
2002,3,231,16,0,1,0,0,0,0,0,,5/8/02,JDOHERTY,GLBA,H,818.21543,0.327286172,0,6478156.806,437279.8036,6478156.804,438098.2799,,,
2002,1,231,11,1,1,1,0,1,0,0,26,5/6/02,JDOHERTY,GLBA,H,1472.40997,0.588963988,0,6478956.049,436515.1268,6478956.636,437987.3208,436953.9893,6479047.063,20021026
2002,4,231,8,1,1,1,0,1,2,0,99,5/14/200,JDOHERTY,GLBA,H,1472.40997,0.588963988,0,6478956.049,436515.1268,6478956.636,437987.3208,437288.2797,6479052.977,20021099
2002,2,232,6,0,1,0,0,0,0,0,,5/7/02,JDOHERTY,GLBA,H,383.15428,0.153261712,0,6471356.596,445759.7705,6471356.901,446142.8829,,,
2002,5,232,1,0,1,0,0,0,1,0,,5/18/200,JDOHERTY,GLBA,H,383.15428,0.153261712,0,6471356.596,445759.7705,6471356.901,446142.8829,,,
2002,1,232,11,0,1,0,0,0,0,0,,5/6/02,JDOHERTY,GLBA,H,559.71373,0.223885492,0,6476555.865,437930.8874,6476556.338,438490.7201,,,
2002,4,232,8,0,1,0,0,0,4,3,,5/14/200,JDOHERTY,GLBA,H,559.71373,0.223885492,0,6476555.865,437930.8874,6476556.338,438490.7201,,,
2002,3,232,16,0,1,0,0,0,0,0,,5/8/02,JDOHERTY,GLBA,H,942.03132,0.376812528,0,6478157.421,445171.3772,6478155.512,446113.3585,,,
2002,2,233,6,1,1,1,0,1,1,0,28,5/7/02,JDOHERTY,GLBA,H,3149.52493,1.259809972,0,6470156.527,437222.2323,6470157.662,440372.1105,439690.0072,6470311.911,20021028
2002,2,233,6,2,1,1,0,1,1,0,28,5/7/02,JDOHERTY,GLBA,H,3149.52493,1.259809972,0,6470156.527,437222.2323,6470157.662,440372.1105,439690.0072,6470192.077,20022028
2002,2,233,6,3,1,1,0,1,1,0,,5/7/02,JDOHERTY,GLBA,H,3149.52493,1.259809972,0,6470156.527,437222.2323,6470157.662,440372.1105,440277.1971,6470240.01,
2002,5,233,1,1,1,1,0,1,0,0,104,5/18/200,JDOHERTY,GLBA,H,3149.52493,1.259809972,0,6470156.527,437222.2323,6470157.662,440372.1105,439437.9636,6470173.515,20021104
2002,5,233,1,2,1,1,0,1,0,0,104,5/18/200,JDOHERTY,GLBA,H,3149.52493,1.259809972,0,6470156.527,437222.2323,6470157.662,440372.1105,439522.3546,6470342.297,20022104
2002,5,233,1,3,1,1,0,1,0,0,104,5/18/200,JDOHERTY,GLBA,H,3149.52493,1.259809972,0,6470156.527,437222.2323,6470157.662,440372.1105,439691.1365,6470370.427,20023104
2002,1,233,11,0,1,0,0,0,0,0,,5/6/02,JDOHERTY,GLBA,H,1182.61804,0.473047216,0,6476556.92,446025.2128,6476557.545,447208.0682,,,
2002,4,233,8,0,1,0,0,0,4,0,,5/14/200,JDOHERTY,GLBA,H,1182.61804,0.473047216,0,6476556.92,446025.2128,6476557.545,447208.0682,,,
2002,3,233,16,0,1,0,0,0,0,0,,5/8/02,JDOHERTY,GLBA,H,858.84979,0.343539916,0,6478155.71,446778.9903,6478157.157,447637.3153,,,
2002,2,234,6,0,1,0,0,0,0,0,,5/7/02,JDOHERTY,GLBA,H,3018.39913,1.207359652,0,6468956.85,436687.0593,6468955.879,439705.215,,,
2002,5,234,1,1,1,1,0,1,3,1,105,5/18/200,JDOHERTY,GLBA,H,3018.39913,1.207359652,0,6468956.85,436687.0593,6468955.879,439705.215,438833.1617,6469132.693,20021105
2002,5,234,1,2,1,1,1,2,3,1,,5/18/200,JDOHERTY,GLBA,H,3018.39913,1.207359652,0,6468956.85,436687.0593,6468955.879,439705.215,439198.8559,6468992.042,
2002,1,234,11,0,1,0,0,0,0,0,,5/6/02,JDOHERTY,GLBA,H,426.02953,0.170411812,0,6475357.42,438250.868,6475356.308,438677.4206,,,
2002,3,234,16,0,1,0,0,0,0,0,,5/8/02,JDOHERTY,GLBA,H,418.23739,0.167294956,0,6476957.291,437897.3173,6476956.261,438315.9111,,,
2002,2,235,6,0,1,0,0,0,0,0,,5/7/02,JDOHERTY,GLBA,H,803.37437,0.321349748,0,6468957.233,440225.1645,6468956.264,441027.9609,,,
2002,5,235,1,0,1,0,0,0,2,3,,5/18/200,JDOHERTY,GLBA,H,803.37437,0.321349748,0,6468957.233,440225.1645,6468956.264,441027.9609,,,
2002,1,235,11,0,1,0,0,0,0,0,,5/6/02,JDOHERTY,GLBA,H,1396.29114,0.558516456,0,6475357.021,446096.3687,6475356.67,447492.8398,,,
2002,3,235,16,0,1,0,0,0,0,0,,5/8/02,JDOHERTY,GLBA,H,1696.06756,0.678427024,0,6476956.911,445954.7816,6476956.197,447651.471,,,
2002,2,236,6,1,1,1,0,1,4,0,27,5/7/02,JDOHERTY,GLBA,H,2819.27265,1.12770906,0,6468956.08,445820.3226,6468957.277,448639.2852,446820.1697,6469029.68,20021027
2002,5,236,1,0,1,0,0,0,4,3,,5/18/200,JDOHERTY,GLBA,H,2819.27265,1.12770906,0,6468956.08,445820.3226,6468957.277,448639.2852,,,
2002,1,236,11,1,1,1,0,1,0,0,5,5/6/02,JDOHERTY,GLBA,H,924.54499,0.369817996,0,6474156.431,438025.4625,6474156.796,438950.9598,438296.4743,6474177.121,20021005
2002,4,236,8,0,1,0,0,0,4,2,,5/14/200,JDOHERTY,GLBA,H,924.54499,0.369817996,0,6474156.431,438025.4625,6474156.796,438950.9598,,,
2002,3,236,16,0,1,0,0,0,0,0,,5/8/02,JDOHERTY,GLBA,H,486.67597,0.194670388,0,6475755.744,438060.4187,6475755.521,438547.3185,,,
2002,2,237,6,0,1,0,0,0,0,0,,5/7/02,JDOHERTY,GLBA,H,464.11986,0.185647944,0,6467757.545,435790.5273,6467757.425,436255.0108,,,
2002,1,237,11,0,1,0,0,0,0,0,,5/6/02,JDOHERTY,GLBA,H,899.3273,0.35973092,0,6474156.392,446221.1476,6474157.185,447120.2809,,,
2002,3,237,16,0,1,0,0,0,0,0,,5/8/02,JDOHERTY,GLBA,H,1315.21866,0.526087464,0,6475756.622,446054.1383,6475755.481,447369.6374,,,
2002,2,238,6,0,1,0,0,0,0,0,,5/7/02,JDOHERTY,GLBA,H,2094.71653,0.837886612,0,6467758.066,439631.2566,6467756.214,441726.1989,,,
2002,5,238,1,0,1,0,0,0,2,0,,5/18/200,JDOHERTY,GLBA,H,2094.71653,0.837886612,0,6467758.066,439631.2566,6467756.214,441726.1989,,,
2002,1,238,11,1,1,1,0,1,4,0,4,5/6/02,JDOHERTY,GLBA,H,959.83685,0.38393474,0,6472955.829,438129.3213,6472957.547,439089.2282,439077.5767,6473037.134,20021004
2002,1,238,11,2,1,3,0,3,4,0,4,5/6/02,JDOHERTY,GLBA,H,959.83685,0.38393474,0,6472955.829,438129.3213,6472957.547,439089.2282,439014.2441,6473111.022,20022004
2002,4,238,8,2,1,1,1,2,4,2,,5/14/200,JDOHERTY,GLBA,H,959.83685,0.38393474,0,6472955.829,438129.3213,6472957.547,439089.2282,438887.3529,6473131.248,
2002,4,238,8,3,1,1,0,1,4,2,,5/14/200,JDOHERTY,GLBA,H,959.83685,0.38393474,0,6472955.829,438129.3213,6472957.547,439089.2282,439145.268,6473069.349,
2002,4,238,8,1,1,1,0,1,4,2,101,5/14/200,JDOHERTY,GLBA,H,959.83685,0.38393474,0,6472955.829,438129.3213,6472957.547,439089.2282,438454.0557,6473048.715,20021101
2002,3,238,16,1,1,2,0,2,0,0,55,5/8/02,JDOHERTY,GLBA,H,788.0033,0.31520132,0,6474557.164,438035.6775,6474557.81,438823.7364,438309.6493,6474803.897,20021055
2002,3,238,16,2,1,1,0,1,0,0,,5/8/02,JDOHERTY,GLBA,H,788.0033,0.31520132,0,6474557.164,438035.6775,6474557.81,438823.7364,438558.3459,6474694.471,
2002,3,238,16,3,1,1,0,1,0,0,,5/8/02,JDOHERTY,GLBA,H,788.0033,0.31520132,0,6474557.164,438035.6775,6474557.81,438823.7364,438667.7725,6474614.888,
2002,3,238,16,4,1,1,1,2,0,0,,5/8/02,JDOHERTY,GLBA,H,788.0033,0.31520132,0,6474557.164,438035.6775,6474557.81,438823.7364,438816.9904,6474535.305,
2002,3,238,16,5,1,1,0,1,0,0,,5/8/02,JDOHERTY,GLBA,H,788.0033,0.31520132,0,6474557.164,438035.6775,6474557.81,438823.7364,438816.9904,6474694.471,
2002,3,238,16,6,1,1,0,1,0,0,,5/8/02,JDOHERTY,GLBA,H,788.0033,0.31520132,0,6474557.164,438035.6775,6474557.81,438823.7364,438677.7203,6474774.054,
2002,2,239,6,0,1,0,0,0,4,0,,5/7/02,JDOHERTY,GLBA,H,2336.25241,0.934500964,0,6467758.376,446138.5166,6467756.813,448475.3222,,,
2002,5,239,1,0,1,0,0,0,4,3,,5/18/200,JDOHERTY,GLBA,H,2336.25241,0.934500964,0,6467758.376,446138.5166,6467756.813,448475.3222,,,
2002,1,239,11,0,1,0,0,0,0,0,,5/6/02,JDOHERTY,GLBA,H,635.82153,0.254328612,0,6472958.194,446168.7009,6472956.958,446804.9868,,,
2002,3,239,16,0,1,0,0,0,0,0,,5/8/02,JDOHERTY,GLBA,H,1090.01637,0.436006548,0,6474557.154,446229.553,6474557.241,447319.4946,,,
2002,2,240,6,0,1,0,0,0,0,0,,5/7/02,JDOHERTY,GLBA,H,1200.75248,0.480300992,0,6466556.645,440526.4476,6466557.271,441727.0097,,,
2002,5,240,1,0,1,0,0,0,2,0,,5/18/200,JDOHERTY,GLBA,H,1200.75248,0.480300992,0,6466556.645,440526.4476,6466557.271,441727.0097,,,
2002,1,240,11,0,1,0,0,0,0,0,,5/6/02,JDOHERTY,GLBA,H,513.07514,0.205230056,0,6471756.448,439107.6666,6471755.969,439620.3978,,,
2002,4,240,8,0,1,0,0,0,4,4,,5/14/200,JDOHERTY,GLBA,H,513.07514,0.205230056,0,6471756.448,439107.6666,6471755.969,439620.3978,,,
2002,3,240,16,1,1,2,0,2,0,0,57,5/8/02,JDOHERTY,GLBA,H,968.55689,0.387422756,0,6473357.158,438101.532,6473356.879,439070.0798,438528.5023,6473321.665,20021057
2002,3,240,16,2,1,1,0,1,0,0,,5/8/02,JDOHERTY,GLBA,H,968.55689,0.387422756,0,6473357.158,438101.532,6473356.879,439070.0798,438996.052,6473560.414,
2002,2,241,6,0,1,0,0,0,4,0,,5/7/02,JDOHERTY,GLBA,H,2596.4204,1.03856816,0,6466556.756,445525.7411,6466556.989,448121.9345,,,
2002,5,241,1,0,1,0,0,0,4,0,,5/18/200,JDOHERTY,GLBA,H,2596.4204,1.03856816,0,6466556.756,445525.7411,6466556.989,448121.9345,,,
2002,1,241,11,0,1,0,0,0,0,0,,5/6/02,JDOHERTY,GLBA,H,430.77437,0.172309748,0,6471757.57,445752.6266,6471757.221,446183.4529,,,
2002,3,241,16,0,1,0,0,0,0,0,,5/8/02,JDOHERTY,GLBA,H,737.22533,0.294890132,0,6473356.592,446214.1029,6473355.851,446951.66,,,
2002,1,242,11,0,1,0,0,0,0,0,,5/6/02,JDOHERTY,GLBA,H,581.73698,0.232694792,0,6471756.819,449431.2019,6471756.804,450013.0985,,,
2002,3,242,16,1,1,1,0,1,0,0,,5/8/02,JDOHERTY,GLBA,H,487.49745,0.19499898,0,6472158.036,438823.4249,6472156.055,439310.7396,439175.1136,6472386.566,
2002,1,243,11,1,1,1,0,1,4,0,,5/6/02,JDOHERTY,GLBA,H,5649.18254,2.259673016,0,6470556.523,445504.0083,6470556.589,451153.2148,445769.7247,6470577.717,
2002,3,243,16,0,1,0,0,0,0,0,,5/8/02,JDOHERTY,GLBA,H,603.74548,0.241498192,0,6472156.703,445744.4858,6472155.851,446347.7705,,,
2002,1,244,11,0,1,0,0,0,0,0,,5/6/02,JDOHERTY,GLBA,H,2963.3536,1.18534144,0,6469357.192,436836.8807,6469357.17,439800.1191,,,
2002,3,244,16,1,1,1,0,1,4,0,61,5/8/02,JDOHERTY,GLBA,H,5484.04509,2.193618036,0,6470956.899,445674.316,6470957.392,451158.1895,446834.9698,6470983.917,20021061
2002,1,245,11,1,1,2,1,3,2,0,7,5/6/02,JDOHERTY,GLBA,H,3157.05228,1.262820912,0,6469357.241,445664.9132,6469357.623,448822.0125,448577.4714,6469427.174,20021007
2002,1,245,11,2,1,2,0,2,2,0,,5/6/02,JDOHERTY,GLBA,H,3157.05228,1.262820912,0,6469357.241,445664.9132,6469357.623,448822.0125,448197.4756,6469427.174,
[truncated: 428,827 more chars]
